# Supplementary material for: Discovery Strategies of Bioactive Compounds Synthesized by Nonribosomal Peptide Synthetases and Type-I Polyketide Synthases Derived from Marine Microbiomes
Source: Mar Drugs. 2016 Apr 16;14(4):80. doi: 10.3390/md14040080 (PMC4849084; doi:10.3390/md14040080)
Supplement: Supplementary File 1 [file marinedrugs-14-00080-s001.xlsx]

## Sheet: ALL_2774
YP_001515431.1	3-oxoacyl-(acyl carrier protein) synthase II [Acaryochloris marina MBIC11017]	3-oxoacyl-(acyl carrier protein) synthase II	Acaryochloris marina MBIC11017	ketoacyl-synt	PF00109.22	Beta-ketoacyl_synthase_N-terminal_domain	253	gi|158334259|ref|YP_001515431.1|	-	387	2.9e-38	119.6	0.3	1	3	5.5e-08	8.2e-08	19.8	0	3	35	4	39	3	50	0.88
YP_001515431.1	3-oxoacyl-(acyl carrier protein) synthase II [Acaryochloris marina MBIC11017]	3-oxoacyl-(acyl carrier protein) synthase II	Acaryochloris marina MBIC11017	ketoacyl-synt	PF00109.22	Beta-ketoacyl_synthase_N-terminal_domain	253	gi|158334259|ref|YP_001515431.1|	-	387	2.9e-38	119.6	0.3	2	3	1.3e-31	2e-31	97.1	0.1	92	252	62	228	54	229	0.82
YP_001515431.1	3-oxoacyl-(acyl carrier protein) synthase II [Acaryochloris marina MBIC11017]	3-oxoacyl-(acyl carrier protein) synthase II	Acaryochloris marina MBIC11017	ketoacyl-synt	PF00109.22	Beta-ketoacyl_synthase_N-terminal_domain	253	gi|158334259|ref|YP_001515431.1|	-	387	2.9e-38	119.6	0.3	3	3	0.33	0.5	-2.5	0	89	118	259	283	254	322	0.7
YP_001515431.1	3-oxoacyl-(acyl carrier protein) synthase II [Acaryochloris marina MBIC11017]	3-oxoacyl-(acyl carrier protein) synthase II	Acaryochloris marina MBIC11017	Ketoacyl-synt_C	PF02801.18	Beta-ketoacyl_synthase_C-terminal_domain	118	gi|158334259|ref|YP_001515431.1|	-	387	3.9e-32	98.5	0.6	1	1	5.4e-32	8.1e-32	97.5	0.6	1	117	237	348	237	349	0.97
YP_001516477.1	acetyl-CoA acetyltransferase [Acaryochloris marina MBIC11017]	acetyl-CoA acetyltransferase	Acaryochloris marina MBIC11017	ketoacyl-synt	PF00109.22	Beta-ketoacyl_synthase_N-terminal_domain	253	gi|158335305|ref|YP_001516477.1|	-	393	3.1e-09	24.4	0.2	1	2	1e-09	3.1e-09	24.4	0.2	169	205	85	121	68	136	0.9
YP_001516477.1	acetyl-CoA acetyltransferase [Acaryochloris marina MBIC11017]	acetyl-CoA acetyltransferase	Acaryochloris marina MBIC11017	ketoacyl-synt	PF00109.22	Beta-ketoacyl_synthase_N-terminal_domain	253	gi|158335305|ref|YP_001516477.1|	-	393	3.1e-09	24.4	0.2	2	2	0.2	0.61	-2.7	0.2	184	202	364	382	350	386	0.77
YP_001517160.1	3-oxoacyl-ACP synthase [Acaryochloris marina MBIC11017]	3-oxoacyl-ACP synthase	Acaryochloris marina MBIC11017	ketoacyl-synt	PF00109.22	Beta-ketoacyl_synthase_N-terminal_domain	253	gi|158335986|ref|YP_001517160.1|	-	376	6.5e-09	23.4	0.4	1	1	2.3e-08	3.4e-08	21	0.1	170	248	123	198	120	202	0.75
YP_001517160.1	3-oxoacyl-ACP synthase [Acaryochloris marina MBIC11017]	3-oxoacyl-ACP synthase	Acaryochloris marina MBIC11017	Ketoacyl-synt_C	PF02801.18	Beta-ketoacyl_synthase_C-terminal_domain	118	gi|158335986|ref|YP_001517160.1|	-	376	5.2e-07	17.5	0	1	3	9.9e-06	1.5e-05	12.8	0	20	59	65	101	52	135	0.79
YP_001517160.1	3-oxoacyl-ACP synthase [Acaryochloris marina MBIC11017]	3-oxoacyl-ACP synthase	Acaryochloris marina MBIC11017	Ketoacyl-synt_C	PF02801.18	Beta-ketoacyl_synthase_C-terminal_domain	118	gi|158335986|ref|YP_001517160.1|	-	376	5.2e-07	17.5	0	2	3	1	1.5	-3.4	0	81	98	228	245	223	255	0.69
YP_001517160.1	3-oxoacyl-ACP synthase [Acaryochloris marina MBIC11017]	3-oxoacyl-ACP synthase	Acaryochloris marina MBIC11017	Ketoacyl-synt_C	PF02801.18	Beta-ketoacyl_synthase_C-terminal_domain	118	gi|158335986|ref|YP_001517160.1|	-	376	5.2e-07	17.5	0	3	3	0.027	0.041	1.7	0	32	57	278	303	271	307	0.85
YP_001517439.1	D-alanyl-D-alanine carboxypeptidase [Acaryochloris marina MBIC11017]	D-alanyl-D-alanine carboxypeptidase	Acaryochloris marina MBIC11017	Ketoacyl-synt_C	PF02801.18	Beta-ketoacyl_synthase_C-terminal_domain	118	gi|158336265|ref|YP_001517439.1|	-	437	2.1e-06	15.5	0.4	1	3	6.3e-05	0.00019	9.3	0.1	13	54	263	304	252	307	0.83
YP_001517439.1	D-alanyl-D-alanine carboxypeptidase [Acaryochloris marina MBIC11017]	D-alanyl-D-alanine carboxypeptidase	Acaryochloris marina MBIC11017	Ketoacyl-synt_C	PF02801.18	Beta-ketoacyl_synthase_C-terminal_domain	118	gi|158336265|ref|YP_001517439.1|	-	437	2.1e-06	15.5	0.4	2	3	0.012	0.035	1.9	0.1	91	112	311	332	309	337	0.89
YP_001517439.1	D-alanyl-D-alanine carboxypeptidase [Acaryochloris marina MBIC11017]	D-alanyl-D-alanine carboxypeptidase	Acaryochloris marina MBIC11017	Ketoacyl-synt_C	PF02801.18	Beta-ketoacyl_synthase_C-terminal_domain	118	gi|158336265|ref|YP_001517439.1|	-	437	2.1e-06	15.5	0.4	3	3	0.05	0.15	-0.1	0	23	50	394	421	377	427	0.81
YP_001519795.1	3-oxoacyl-(acyl carrier protein) synthase II [Acaryochloris marina MBIC11017]	3-oxoacyl-(acyl carrier protein) synthase II	Acaryochloris marina MBIC11017	ketoacyl-synt	PF00109.22	Beta-ketoacyl_synthase_N-terminal_domain	253	gi|158338618|ref|YP_001519795.1|	-	417	1.9e-64	205.3	0.5	1	2	1.3e-64	1.9e-64	205.3	0.5	2	253	7	250	6	250	0.91
YP_001519795.1	3-oxoacyl-(acyl carrier protein) synthase II [Acaryochloris marina MBIC11017]	3-oxoacyl-(acyl carrier protein) synthase II	Acaryochloris marina MBIC11017	ketoacyl-synt	PF00109.22	Beta-ketoacyl_synthase_N-terminal_domain	253	gi|158338618|ref|YP_001519795.1|	-	417	1.9e-64	205.3	0.5	2	2	0.22	0.33	-1.9	0.1	99	133	290	321	283	361	0.54
YP_001519795.1	3-oxoacyl-(acyl carrier protein) synthase II [Acaryochloris marina MBIC11017]	3-oxoacyl-(acyl carrier protein) synthase II	Acaryochloris marina MBIC11017	Ketoacyl-synt_C	PF02801.18	Beta-ketoacyl_synthase_C-terminal_domain	118	gi|158338618|ref|YP_001519795.1|	-	417	9.9e-40	123	2	1	2	1	1.5	-3.3	0	30	40	85	95	71	124	0.61
YP_001519795.1	3-oxoacyl-(acyl carrier protein) synthase II [Acaryochloris marina MBIC11017]	3-oxoacyl-(acyl carrier protein) synthase II	Acaryochloris marina MBIC11017	Ketoacyl-synt_C	PF02801.18	Beta-ketoacyl_synthase_C-terminal_domain	118	gi|158338618|ref|YP_001519795.1|	-	417	9.9e-40	123	2	2	2	6.6e-40	9.9e-40	123	2	1	117	258	372	258	373	0.98
YP_001520879.1	hypothetical protein AM1_A0226 [Acaryochloris marina MBIC11017]	hypothetical protein AM1_A0226	Acaryochloris marina MBIC11017	ketoacyl-synt	PF00109.22	Beta-ketoacyl_synthase_N-terminal_domain	253	gi|158339490|ref|YP_001520879.1|	-	536	8.9e-09	22.9	1.2	1	2	0.033	0.1	-0.2	0.1	71	111	90	131	26	148	0.67
YP_001520879.1	hypothetical protein AM1_A0226 [Acaryochloris marina MBIC11017]	hypothetical protein AM1_A0226	Acaryochloris marina MBIC11017	ketoacyl-synt	PF00109.22	Beta-ketoacyl_synthase_N-terminal_domain	253	gi|158339490|ref|YP_001520879.1|	-	536	8.9e-09	22.9	1.2	2	2	1e-08	3.1e-08	21.1	0.1	154	199	147	192	134	199	0.87
YP_001520880.1	barbamide biosynthesis protein BarG [Acaryochloris marina MBIC11017]	barbamide biosynthesis protein BarG	Acaryochloris marina MBIC11017	Condensation	PF00668.16	Condensation_domain	301	gi|158339491|ref|YP_001520880.1|	-	1203	3.7e-46	145.2	0.1	1	1	2.2e-46	6.7e-46	144.3	0.1	5	299	82	376	79	378	0.93
YP_001520881.1	beta-ketoacyl synthase, putative [Acaryochloris marina MBIC11017]	beta-ketoacyl synthase, putative	Acaryochloris marina MBIC11017	ketoacyl-synt	PF00109.22	Beta-ketoacyl_synthase_N-terminal_domain	253	gi|158339492|ref|YP_001520881.1|	-	1665	1e-78	252.1	0.2	1	1	1.4e-78	2.1e-78	251	0.2	3	253	9	255	8	255	0.91
YP_001520881.1	beta-ketoacyl synthase, putative [Acaryochloris marina MBIC11017]	beta-ketoacyl synthase, putative	Acaryochloris marina MBIC11017	Ketoacyl-synt_C	PF02801.18	Beta-ketoacyl_synthase_C-terminal_domain	118	gi|158339492|ref|YP_001520881.1|	-	1665	9.6e-45	139.2	1.6	1	1	1.9e-44	2.8e-44	137.7	1.6	1	117	263	381	263	382	0.98
YP_001520882.1	nonribosomal polyketide synthase protein [Acaryochloris marina MBIC11017]	nonribosomal polyketide synthase protein	Acaryochloris marina MBIC11017	Condensation	PF00668.16	Condensation_domain	301	gi|158339493|ref|YP_001520882.1|	-	1450	3.5e-42	132.1	0.8	1	1	2.7e-42	8.1e-42	130.9	0.8	4	299	86	382	84	384	0.9
YP_001520883.1	polyketide synthase type I, putative [Acaryochloris marina MBIC11017]	polyketide synthase type I, putative	Acaryochloris marina MBIC11017	ketoacyl-synt	PF00109.22	Beta-ketoacyl_synthase_N-terminal_domain	253	gi|158339494|ref|YP_001520883.1|	-	1552	9.1e-76	242.4	2.4	1	3	6.8e-76	1e-75	242.2	0	3	252	5	250	4	251	0.96
YP_001520883.1	polyketide synthase type I, putative [Acaryochloris marina MBIC11017]	polyketide synthase type I, putative	Acaryochloris marina MBIC11017	ketoacyl-synt	PF00109.22	Beta-ketoacyl_synthase_N-terminal_domain	253	gi|158339494|ref|YP_001520883.1|	-	1552	9.1e-76	242.4	2.4	2	3	0.9	1.3	-3.9	0.1	97	168	290	360	287	363	0.64
YP_001520883.1	polyketide synthase type I, putative [Acaryochloris marina MBIC11017]	polyketide synthase type I, putative	Acaryochloris marina MBIC11017	ketoacyl-synt	PF00109.22	Beta-ketoacyl_synthase_N-terminal_domain	253	gi|158339494|ref|YP_001520883.1|	-	1552	9.1e-76	242.4	2.4	3	3	0.2	0.31	-1.8	0.1	83	124	590	631	573	660	0.75
YP_001520883.1	polyketide synthase type I, putative [Acaryochloris marina MBIC11017]	polyketide synthase type I, putative	Acaryochloris marina MBIC11017	Ketoacyl-synt_C	PF02801.18	Beta-ketoacyl_synthase_C-terminal_domain	118	gi|158339494|ref|YP_001520883.1|	-	1552	3.5e-46	143.9	0.9	1	1	6.2e-46	9.3e-46	142.5	0.9	1	117	259	377	259	378	0.98
YP_001520884.1	non-ribosomal peptide synthetase [Acaryochloris marina MBIC11017]	non-ribosomal peptide synthetase	Acaryochloris marina MBIC11017	Condensation	PF00668.16	Condensation_domain	301	gi|158339495|ref|YP_001520884.1|	-	2719	1.6e-221	721	7.7	1	3	5.9e-85	1.8e-84	271	2.2	5	300	52	354	49	355	0.98
YP_001520884.1	non-ribosomal peptide synthetase [Acaryochloris marina MBIC11017]	non-ribosomal peptide synthetase	Acaryochloris marina MBIC11017	Condensation	PF00668.16	Condensation_domain	301	gi|158339495|ref|YP_001520884.1|	-	2719	1.6e-221	721	7.7	2	3	9.6e-80	2.9e-79	253.9	0	2	300	1153	1454	1152	1455	0.98
YP_001520884.1	non-ribosomal peptide synthetase [Acaryochloris marina MBIC11017]	non-ribosomal peptide synthetase	Acaryochloris marina MBIC11017	Condensation	PF00668.16	Condensation_domain	301	gi|158339495|ref|YP_001520884.1|	-	2719	1.6e-221	721	7.7	3	3	1.8e-62	5.5e-62	197.1	0.5	5	299	2241	2549	2237	2551	0.87
YP_001520885.1	non-ribosomal peptide synthetase [Acaryochloris marina MBIC11017]	non-ribosomal peptide synthetase	Acaryochloris marina MBIC11017	Condensation	PF00668.16	Condensation_domain	301	gi|158339496|ref|YP_001520885.1|	-	482	3.5e-69	220.8	0.1	1	1	1.5e-69	4.5e-69	220.4	0.1	2	300	10	310	9	311	0.93
YP_001520887.1	peptide synthetase, putative [Acaryochloris marina MBIC11017]	peptide synthetase, putative	Acaryochloris marina MBIC11017	Condensation	PF00668.16	Condensation_domain	301	gi|158339498|ref|YP_001520887.1|	-	3081	2e-173	563.1	2.2	1	3	2.7e-16	8.2e-16	45.6	0	183	273	12	102	9	116	0.95
YP_001520887.1	peptide synthetase, putative [Acaryochloris marina MBIC11017]	peptide synthetase, putative	Acaryochloris marina MBIC11017	Condensation	PF00668.16	Condensation_domain	301	gi|158339498|ref|YP_001520887.1|	-	3081	2e-173	563.1	2.2	2	3	4.2e-80	1.2e-79	255.1	0.4	4	300	912	1211	909	1212	0.95
YP_001520887.1	peptide synthetase, putative [Acaryochloris marina MBIC11017]	peptide synthetase, putative	Acaryochloris marina MBIC11017	Condensation	PF00668.16	Condensation_domain	301	gi|158339498|ref|YP_001520887.1|	-	3081	2e-173	563.1	2.2	3	3	1.4e-81	4.3e-81	259.9	0.1	4	300	1982	2278	1980	2279	0.97
YP_001520888.1	nonribosomal protein synthetase [Acaryochloris marina MBIC11017]	nonribosomal protein synthetase	Acaryochloris marina MBIC11017	Condensation	PF00668.16	Condensation_domain	301	gi|158339499|ref|YP_001520888.1|	-	1573	2.2e-88	283.8	1.2	1	1	1.5e-88	4.6e-88	282.8	1.2	4	300	86	385	84	386	0.98
YP_008379550.1	hypothetical protein APA386B_1P216 [Acetobacter pasteurianus 386B]	hypothetical protein APA386B_1P216	Acetobacter pasteurianus 386B	Ketoacyl-synt_C	PF02801.18	Beta-ketoacyl_synthase_C-terminal_domain	118	gi|529218744|ref|YP_008379550.1|	-	66	1.1e-07	19.7	0	1	1	4.8e-08	1.4e-07	19.3	0	6	49	21	64	17	65	0.94
YP_008379551.1	acyl-carrier-protein synthase II [Acetobacter pasteurianus 386B]	acyl-carrier-protein synthase II	Acetobacter pasteurianus 386B	Ketoacyl-synt_C	PF02801.18	Beta-ketoacyl_synthase_C-terminal_domain	118	gi|529218745|ref|YP_008379551.1|	-	93	1.1e-10	29.3	0	1	1	4.6e-11	1.4e-10	29	0	70	117	3	47	1	48	0.89
YP_008391460.1	3-Oxoacyl-[acyl-carrier-protein (ACP)] synthase III [Acetobacter pasteurianus 386B]	3-Oxoacyl-acyl-carrier-protein (ACP) synthase III	Acetobacter pasteurianus 386B	ketoacyl-synt	PF00109.22	Beta-ketoacyl_synthase_N-terminal_domain	253	gi|529230645|ref|YP_008391460.1|	-	326	2.6e-06	14.9	3.6	1	2	1.1e-06	3.3e-06	14.5	0.5	102	206	43	150	32	159	0.78
YP_008391460.1	3-Oxoacyl-[acyl-carrier-protein (ACP)] synthase III [Acetobacter pasteurianus 386B]	3-Oxoacyl-acyl-carrier-protein (ACP) synthase III	Acetobacter pasteurianus 386B	ketoacyl-synt	PF00109.22	Beta-ketoacyl_synthase_N-terminal_domain	253	gi|529230645|ref|YP_008391460.1|	-	326	2.6e-06	14.9	3.6	2	2	0.02	0.061	0.5	0.1	237	249	163	175	154	178	0.84
YP_008393445.1	3-oxoacyl-(acyl carrier protein) synthase II [Acetobacter pasteurianus 386B]	3-oxoacyl-(acyl carrier protein) synthase II	Acetobacter pasteurianus 386B	ketoacyl-synt	PF00109.22	Beta-ketoacyl_synthase_N-terminal_domain	253	gi|529232630|ref|YP_008393445.1|	-	436	4.8e-67	213.8	1.1	1	2	4.1e-67	6.2e-67	213.5	0.2	2	253	20	272	19	272	0.89
YP_008393445.1	3-oxoacyl-(acyl carrier protein) synthase II [Acetobacter pasteurianus 386B]	3-oxoacyl-(acyl carrier protein) synthase II	Acetobacter pasteurianus 386B	ketoacyl-synt	PF00109.22	Beta-ketoacyl_synthase_N-terminal_domain	253	gi|529232630|ref|YP_008393445.1|	-	436	4.8e-67	213.8	1.1	2	2	0.31	0.47	-2.4	0	94	113	307	326	303	369	0.73
YP_008393445.1	3-oxoacyl-(acyl carrier protein) synthase II [Acetobacter pasteurianus 386B]	3-oxoacyl-(acyl carrier protein) synthase II	Acetobacter pasteurianus 386B	Ketoacyl-synt_C	PF02801.18	Beta-ketoacyl_synthase_C-terminal_domain	118	gi|529232630|ref|YP_008393445.1|	-	436	7.7e-39	120.2	0.2	1	1	1e-38	1.5e-38	119.2	0.2	1	117	280	393	280	394	0.97
YP_003187700.1	3-oxoacyl-(acyl carrier protein) synthase II [Acetobacter pasteurianus IFO 3283-01]	3-oxoacyl-(acyl carrier protein) synthase II	Acetobacter pasteurianus IFO 3283-01	ketoacyl-synt	PF00109.22	Beta-ketoacyl_synthase_N-terminal_domain	253	gi|258542267|ref|YP_003187700.1|	-	436	4.8e-67	213.8	1.1	1	2	4.1e-67	6.2e-67	213.5	0.2	2	253	20	272	19	272	0.89
YP_003187700.1	3-oxoacyl-(acyl carrier protein) synthase II [Acetobacter pasteurianus IFO 3283-01]	3-oxoacyl-(acyl carrier protein) synthase II	Acetobacter pasteurianus IFO 3283-01	ketoacyl-synt	PF00109.22	Beta-ketoacyl_synthase_N-terminal_domain	253	gi|258542267|ref|YP_003187700.1|	-	436	4.8e-67	213.8	1.1	2	2	0.31	0.47	-2.4	0	94	113	307	326	303	369	0.73
YP_003187700.1	3-oxoacyl-(acyl carrier protein) synthase II [Acetobacter pasteurianus IFO 3283-01]	3-oxoacyl-(acyl carrier protein) synthase II	Acetobacter pasteurianus IFO 3283-01	Ketoacyl-synt_C	PF02801.18	Beta-ketoacyl_synthase_C-terminal_domain	118	gi|258542267|ref|YP_003187700.1|	-	436	7.7e-39	120.2	0.2	1	1	1e-38	1.5e-38	119.2	0.2	1	117	280	393	280	394	0.97
YP_003188208.1	3-oxoacyl-[acyl-carrier-protein (ACP)] synthase III [Acetobacter pasteurianus IFO 3283-01]	3-oxoacyl-acyl-carrier-protein (ACP) synthase III	Acetobacter pasteurianus IFO 3283-01	ketoacyl-synt	PF00109.22	Beta-ketoacyl_synthase_N-terminal_domain	253	gi|258542775|ref|YP_003188208.1|	-	326	2.6e-06	14.9	3.6	1	2	1.1e-06	3.3e-06	14.5	0.5	102	206	43	150	32	159	0.78
YP_003188208.1	3-oxoacyl-[acyl-carrier-protein (ACP)] synthase III [Acetobacter pasteurianus IFO 3283-01]	3-oxoacyl-acyl-carrier-protein (ACP) synthase III	Acetobacter pasteurianus IFO 3283-01	ketoacyl-synt	PF00109.22	Beta-ketoacyl_synthase_N-terminal_domain	253	gi|258542775|ref|YP_003188208.1|	-	326	2.6e-06	14.9	3.6	2	2	0.02	0.061	0.5	0.1	237	249	163	175	154	178	0.84
YP_005501680.1	3-oxoacyl-[acyl-carrier-protein (ACP)] synthase II [Acetobacter pasteurianus IFO 3283-01-42C]	3-oxoacyl-acyl-carrier-protein (ACP) synthase II	Acetobacter pasteurianus IFO 3283-01-42C	ketoacyl-synt	PF00109.22	Beta-ketoacyl_synthase_N-terminal_domain	253	gi|384119056|ref|YP_005501680.1|	-	436	4.8e-67	213.8	1.1	1	2	4.1e-67	6.2e-67	213.5	0.2	2	253	20	272	19	272	0.89
YP_005501680.1	3-oxoacyl-[acyl-carrier-protein (ACP)] synthase II [Acetobacter pasteurianus IFO 3283-01-42C]	3-oxoacyl-acyl-carrier-protein (ACP) synthase II	Acetobacter pasteurianus IFO 3283-01-42C	ketoacyl-synt	PF00109.22	Beta-ketoacyl_synthase_N-terminal_domain	253	gi|384119056|ref|YP_005501680.1|	-	436	4.8e-67	213.8	1.1	2	2	0.31	0.47	-2.4	0	94	113	307	326	303	369	0.73
YP_005501680.1	3-oxoacyl-[acyl-carrier-protein (ACP)] synthase II [Acetobacter pasteurianus IFO 3283-01-42C]	3-oxoacyl-acyl-carrier-protein (ACP) synthase II	Acetobacter pasteurianus IFO 3283-01-42C	Ketoacyl-synt_C	PF02801.18	Beta-ketoacyl_synthase_C-terminal_domain	118	gi|384119056|ref|YP_005501680.1|	-	436	7.7e-39	120.2	0.2	1	1	1e-38	1.5e-38	119.2	0.2	1	117	280	393	280	394	0.97
YP_005502122.1	3-oxoacyl-[acyl-carrier-protein (ACP)] synthase III [Acetobacter pasteurianus IFO 3283-01-42C]	3-oxoacyl-acyl-carrier-protein (ACP) synthase III	Acetobacter pasteurianus IFO 3283-01-42C	ketoacyl-synt	PF00109.22	Beta-ketoacyl_synthase_N-terminal_domain	253	gi|384119498|ref|YP_005502122.1|	-	326	2.6e-06	14.9	3.6	1	2	1.1e-06	3.3e-06	14.5	0.5	102	206	43	150	32	159	0.78
YP_005502122.1	3-oxoacyl-[acyl-carrier-protein (ACP)] synthase III [Acetobacter pasteurianus IFO 3283-01-42C]	3-oxoacyl-acyl-carrier-protein (ACP) synthase III	Acetobacter pasteurianus IFO 3283-01-42C	ketoacyl-synt	PF00109.22	Beta-ketoacyl_synthase_N-terminal_domain	253	gi|384119498|ref|YP_005502122.1|	-	326	2.6e-06	14.9	3.6	2	2	0.02	0.061	0.5	0.1	237	249	163	175	154	178	0.84
YP_005477768.1	3-oxoacyl-[acyl-carrier-protein (ACP)] synthase II [Acetobacter pasteurianus IFO 3283-03]	3-oxoacyl-acyl-carrier-protein (ACP) synthase II	Acetobacter pasteurianus IFO 3283-03	ketoacyl-synt	PF00109.22	Beta-ketoacyl_synthase_N-terminal_domain	253	gi|384050705|ref|YP_005477768.1|	-	436	4.8e-67	213.8	1.1	1	2	4.1e-67	6.2e-67	213.5	0.2	2	253	20	272	19	272	0.89
YP_005477768.1	3-oxoacyl-[acyl-carrier-protein (ACP)] synthase II [Acetobacter pasteurianus IFO 3283-03]	3-oxoacyl-acyl-carrier-protein (ACP) synthase II	Acetobacter pasteurianus IFO 3283-03	ketoacyl-synt	PF00109.22	Beta-ketoacyl_synthase_N-terminal_domain	253	gi|384050705|ref|YP_005477768.1|	-	436	4.8e-67	213.8	1.1	2	2	0.31	0.47	-2.4	0	94	113	307	326	303	369	0.73
YP_005477768.1	3-oxoacyl-[acyl-carrier-protein (ACP)] synthase II [Acetobacter pasteurianus IFO 3283-03]	3-oxoacyl-acyl-carrier-protein (ACP) synthase II	Acetobacter pasteurianus IFO 3283-03	Ketoacyl-synt_C	PF02801.18	Beta-ketoacyl_synthase_C-terminal_domain	118	gi|384050705|ref|YP_005477768.1|	-	436	7.7e-39	120.2	0.2	1	1	1e-38	1.5e-38	119.2	0.2	1	117	280	393	280	394	0.97
YP_005478276.1	3-oxoacyl-[acyl-carrier-protein (ACP)] synthase III [Acetobacter pasteurianus IFO 3283-03]	3-oxoacyl-acyl-carrier-protein (ACP) synthase III	Acetobacter pasteurianus IFO 3283-03	ketoacyl-synt	PF00109.22	Beta-ketoacyl_synthase_N-terminal_domain	253	gi|384051213|ref|YP_005478276.1|	-	326	2.6e-06	14.9	3.6	1	2	1.1e-06	3.3e-06	14.5	0.5	102	206	43	150	32	159	0.78
YP_005478276.1	3-oxoacyl-[acyl-carrier-protein (ACP)] synthase III [Acetobacter pasteurianus IFO 3283-03]	3-oxoacyl-acyl-carrier-protein (ACP) synthase III	Acetobacter pasteurianus IFO 3283-03	ketoacyl-synt	PF00109.22	Beta-ketoacyl_synthase_N-terminal_domain	253	gi|384051213|ref|YP_005478276.1|	-	326	2.6e-06	14.9	3.6	2	2	0.02	0.061	0.5	0.1	237	249	163	175	154	178	0.84
YP_005486907.1	3-oxoacyl-[acyl-carrier-protein (ACP)] synthase II [Acetobacter pasteurianus IFO 3283-07]	3-oxoacyl-acyl-carrier-protein (ACP) synthase II	Acetobacter pasteurianus IFO 3283-07	ketoacyl-synt	PF00109.22	Beta-ketoacyl_synthase_N-terminal_domain	253	gi|384053813|ref|YP_005486907.1|	-	436	4.8e-67	213.8	1.1	1	2	4.1e-67	6.2e-67	213.5	0.2	2	253	20	272	19	272	0.89
YP_005486907.1	3-oxoacyl-[acyl-carrier-protein (ACP)] synthase II [Acetobacter pasteurianus IFO 3283-07]	3-oxoacyl-acyl-carrier-protein (ACP) synthase II	Acetobacter pasteurianus IFO 3283-07	ketoacyl-synt	PF00109.22	Beta-ketoacyl_synthase_N-terminal_domain	253	gi|384053813|ref|YP_005486907.1|	-	436	4.8e-67	213.8	1.1	2	2	0.31	0.47	-2.4	0	94	113	307	326	303	369	0.73
YP_005486907.1	3-oxoacyl-[acyl-carrier-protein (ACP)] synthase II [Acetobacter pasteurianus IFO 3283-07]	3-oxoacyl-acyl-carrier-protein (ACP) synthase II	Acetobacter pasteurianus IFO 3283-07	Ketoacyl-synt_C	PF02801.18	Beta-ketoacyl_synthase_C-terminal_domain	118	gi|384053813|ref|YP_005486907.1|	-	436	7.7e-39	120.2	0.2	1	1	1e-38	1.5e-38	119.2	0.2	1	117	280	393	280	394	0.97
YP_005487415.1	3-oxoacyl-[acyl-carrier-protein (ACP)] synthase III [Acetobacter pasteurianus IFO 3283-07]	3-oxoacyl-acyl-carrier-protein (ACP) synthase III	Acetobacter pasteurianus IFO 3283-07	ketoacyl-synt	PF00109.22	Beta-ketoacyl_synthase_N-terminal_domain	253	gi|384054321|ref|YP_005487415.1|	-	326	2.6e-06	14.9	3.6	1	2	1.1e-06	3.3e-06	14.5	0.5	102	206	43	150	32	159	0.78
YP_005487415.1	3-oxoacyl-[acyl-carrier-protein (ACP)] synthase III [Acetobacter pasteurianus IFO 3283-07]	3-oxoacyl-acyl-carrier-protein (ACP) synthase III	Acetobacter pasteurianus IFO 3283-07	ketoacyl-synt	PF00109.22	Beta-ketoacyl_synthase_N-terminal_domain	253	gi|384054321|ref|YP_005487415.1|	-	326	2.6e-06	14.9	3.6	2	2	0.02	0.061	0.5	0.1	237	249	163	175	154	178	0.84
YP_005480932.1	3-oxoacyl-[acyl-carrier-protein (ACP)] synthase II [Acetobacter pasteurianus IFO 3283-12]	3-oxoacyl-acyl-carrier-protein (ACP) synthase II	Acetobacter pasteurianus IFO 3283-12	ketoacyl-synt	PF00109.22	Beta-ketoacyl_synthase_N-terminal_domain	253	gi|384042188|ref|YP_005480932.1|	-	436	4.8e-67	213.8	1.1	1	2	4.1e-67	6.2e-67	213.5	0.2	2	253	20	272	19	272	0.89
YP_005480932.1	3-oxoacyl-[acyl-carrier-protein (ACP)] synthase II [Acetobacter pasteurianus IFO 3283-12]	3-oxoacyl-acyl-carrier-protein (ACP) synthase II	Acetobacter pasteurianus IFO 3283-12	ketoacyl-synt	PF00109.22	Beta-ketoacyl_synthase_N-terminal_domain	253	gi|384042188|ref|YP_005480932.1|	-	436	4.8e-67	213.8	1.1	2	2	0.31	0.47	-2.4	0	94	113	307	326	303	369	0.73
YP_005480932.1	3-oxoacyl-[acyl-carrier-protein (ACP)] synthase II [Acetobacter pasteurianus IFO 3283-12]	3-oxoacyl-acyl-carrier-protein (ACP) synthase II	Acetobacter pasteurianus IFO 3283-12	Ketoacyl-synt_C	PF02801.18	Beta-ketoacyl_synthase_C-terminal_domain	118	gi|384042188|ref|YP_005480932.1|	-	436	7.7e-39	120.2	0.2	1	1	1e-38	1.5e-38	119.2	0.2	1	117	280	393	280	394	0.97
YP_005481440.1	3-oxoacyl-[acyl-carrier-protein (ACP)] synthase III [Acetobacter pasteurianus IFO 3283-12]	3-oxoacyl-acyl-carrier-protein (ACP) synthase III	Acetobacter pasteurianus IFO 3283-12	ketoacyl-synt	PF00109.22	Beta-ketoacyl_synthase_N-terminal_domain	253	gi|384042696|ref|YP_005481440.1|	-	326	2.6e-06	14.9	3.6	1	2	1.1e-06	3.3e-06	14.5	0.5	102	206	43	150	32	159	0.78
YP_005481440.1	3-oxoacyl-[acyl-carrier-protein (ACP)] synthase III [Acetobacter pasteurianus IFO 3283-12]	3-oxoacyl-acyl-carrier-protein (ACP) synthase III	Acetobacter pasteurianus IFO 3283-12	ketoacyl-synt	PF00109.22	Beta-ketoacyl_synthase_N-terminal_domain	253	gi|384042696|ref|YP_005481440.1|	-	326	2.6e-06	14.9	3.6	2	2	0.02	0.061	0.5	0.1	237	249	163	175	154	178	0.84
YP_005489714.1	3-oxoacyl-[acyl-carrier-protein (ACP)] synthase II [Acetobacter pasteurianus IFO 3283-22]	3-oxoacyl-acyl-carrier-protein (ACP) synthase II	Acetobacter pasteurianus IFO 3283-22	ketoacyl-synt	PF00109.22	Beta-ketoacyl_synthase_N-terminal_domain	253	gi|384057047|ref|YP_005489714.1|	-	436	4.8e-67	213.8	1.1	1	2	4.1e-67	6.2e-67	213.5	0.2	2	253	20	272	19	272	0.89
YP_005489714.1	3-oxoacyl-[acyl-carrier-protein (ACP)] synthase II [Acetobacter pasteurianus IFO 3283-22]	3-oxoacyl-acyl-carrier-protein (ACP) synthase II	Acetobacter pasteurianus IFO 3283-22	ketoacyl-synt	PF00109.22	Beta-ketoacyl_synthase_N-terminal_domain	253	gi|384057047|ref|YP_005489714.1|	-	436	4.8e-67	213.8	1.1	2	2	0.31	0.47	-2.4	0	94	113	307	326	303	369	0.73
YP_005489714.1	3-oxoacyl-[acyl-carrier-protein (ACP)] synthase II [Acetobacter pasteurianus IFO 3283-22]	3-oxoacyl-acyl-carrier-protein (ACP) synthase II	Acetobacter pasteurianus IFO 3283-22	Ketoacyl-synt_C	PF02801.18	Beta-ketoacyl_synthase_C-terminal_domain	118	gi|384057047|ref|YP_005489714.1|	-	436	7.7e-39	120.2	0.2	1	1	1e-38	1.5e-38	119.2	0.2	1	117	280	393	280	394	0.97
YP_005490222.1	3-oxoacyl-[acyl-carrier-protein (ACP)] synthase III [Acetobacter pasteurianus IFO 3283-22]	3-oxoacyl-acyl-carrier-protein (ACP) synthase III	Acetobacter pasteurianus IFO 3283-22	ketoacyl-synt	PF00109.22	Beta-ketoacyl_synthase_N-terminal_domain	253	gi|384057555|ref|YP_005490222.1|	-	326	2.6e-06	14.9	3.6	1	2	1.1e-06	3.3e-06	14.5	0.5	102	206	43	150	32	159	0.78
YP_005490222.1	3-oxoacyl-[acyl-carrier-protein (ACP)] synthase III [Acetobacter pasteurianus IFO 3283-22]	3-oxoacyl-acyl-carrier-protein (ACP) synthase III	Acetobacter pasteurianus IFO 3283-22	ketoacyl-synt	PF00109.22	Beta-ketoacyl_synthase_N-terminal_domain	253	gi|384057555|ref|YP_005490222.1|	-	326	2.6e-06	14.9	3.6	2	2	0.02	0.061	0.5	0.1	237	249	163	175	154	178	0.84
YP_005498816.1	3-oxoacyl-[acyl-carrier-protein (ACP)] synthase II [Acetobacter pasteurianus IFO 3283-26]	3-oxoacyl-acyl-carrier-protein (ACP) synthase II	Acetobacter pasteurianus IFO 3283-26	ketoacyl-synt	PF00109.22	Beta-ketoacyl_synthase_N-terminal_domain	253	gi|384059688|ref|YP_005498816.1|	-	436	4.8e-67	213.8	1.1	1	2	4.1e-67	6.2e-67	213.5	0.2	2	253	20	272	19	272	0.89
YP_005498816.1	3-oxoacyl-[acyl-carrier-protein (ACP)] synthase II [Acetobacter pasteurianus IFO 3283-26]	3-oxoacyl-acyl-carrier-protein (ACP) synthase II	Acetobacter pasteurianus IFO 3283-26	ketoacyl-synt	PF00109.22	Beta-ketoacyl_synthase_N-terminal_domain	253	gi|384059688|ref|YP_005498816.1|	-	436	4.8e-67	213.8	1.1	2	2	0.31	0.47	-2.4	0	94	113	307	326	303	369	0.73
YP_005498816.1	3-oxoacyl-[acyl-carrier-protein (ACP)] synthase II [Acetobacter pasteurianus IFO 3283-26]	3-oxoacyl-acyl-carrier-protein (ACP) synthase II	Acetobacter pasteurianus IFO 3283-26	Ketoacyl-synt_C	PF02801.18	Beta-ketoacyl_synthase_C-terminal_domain	118	gi|384059688|ref|YP_005498816.1|	-	436	7.7e-39	120.2	0.2	1	1	1e-38	1.5e-38	119.2	0.2	1	117	280	393	280	394	0.97
YP_005499324.1	3-oxoacyl-[acyl-carrier-protein (ACP)] synthase III [Acetobacter pasteurianus IFO 3283-26]	3-oxoacyl-acyl-carrier-protein (ACP) synthase III	Acetobacter pasteurianus IFO 3283-26	ketoacyl-synt	PF00109.22	Beta-ketoacyl_synthase_N-terminal_domain	253	gi|384060196|ref|YP_005499324.1|	-	326	2.6e-06	14.9	3.6	1	2	1.1e-06	3.3e-06	14.5	0.5	102	206	43	150	32	159	0.78
YP_005499324.1	3-oxoacyl-[acyl-carrier-protein (ACP)] synthase III [Acetobacter pasteurianus IFO 3283-26]	3-oxoacyl-acyl-carrier-protein (ACP) synthase III	Acetobacter pasteurianus IFO 3283-26	ketoacyl-synt	PF00109.22	Beta-ketoacyl_synthase_N-terminal_domain	253	gi|384060196|ref|YP_005499324.1|	-	326	2.6e-06	14.9	3.6	2	2	0.02	0.061	0.5	0.1	237	249	163	175	154	178	0.84
YP_005483622.1	3-oxoacyl-[acyl-carrier-protein (ACP)] synthase II [Acetobacter pasteurianus IFO 3283-32]	3-oxoacyl-acyl-carrier-protein (ACP) synthase II	Acetobacter pasteurianus IFO 3283-32	ketoacyl-synt	PF00109.22	Beta-ketoacyl_synthase_N-terminal_domain	253	gi|384062980|ref|YP_005483622.1|	-	436	4.8e-67	213.8	1.1	1	2	4.1e-67	6.2e-67	213.5	0.2	2	253	20	272	19	272	0.89
YP_005483622.1	3-oxoacyl-[acyl-carrier-protein (ACP)] synthase II [Acetobacter pasteurianus IFO 3283-32]	3-oxoacyl-acyl-carrier-protein (ACP) synthase II	Acetobacter pasteurianus IFO 3283-32	ketoacyl-synt	PF00109.22	Beta-ketoacyl_synthase_N-terminal_domain	253	gi|384062980|ref|YP_005483622.1|	-	436	4.8e-67	213.8	1.1	2	2	0.31	0.47	-2.4	0	94	113	307	326	303	369	0.73
YP_005483622.1	3-oxoacyl-[acyl-carrier-protein (ACP)] synthase II [Acetobacter pasteurianus IFO 3283-32]	3-oxoacyl-acyl-carrier-protein (ACP) synthase II	Acetobacter pasteurianus IFO 3283-32	Ketoacyl-synt_C	PF02801.18	Beta-ketoacyl_synthase_C-terminal_domain	118	gi|384062980|ref|YP_005483622.1|	-	436	7.7e-39	120.2	0.2	1	1	1e-38	1.5e-38	119.2	0.2	1	117	280	393	280	394	0.97
YP_005484130.1	3-oxoacyl-[acyl-carrier-protein (ACP)] synthase III [Acetobacter pasteurianus IFO 3283-32]	3-oxoacyl-acyl-carrier-protein (ACP) synthase III	Acetobacter pasteurianus IFO 3283-32	ketoacyl-synt	PF00109.22	Beta-ketoacyl_synthase_N-terminal_domain	253	gi|384063488|ref|YP_005484130.1|	-	326	2.6e-06	14.9	3.6	1	2	1.1e-06	3.3e-06	14.5	0.5	102	206	43	150	32	159	0.78
YP_005484130.1	3-oxoacyl-[acyl-carrier-protein (ACP)] synthase III [Acetobacter pasteurianus IFO 3283-32]	3-oxoacyl-acyl-carrier-protein (ACP) synthase III	Acetobacter pasteurianus IFO 3283-32	ketoacyl-synt	PF00109.22	Beta-ketoacyl_synthase_N-terminal_domain	253	gi|384063488|ref|YP_005484130.1|	-	326	2.6e-06	14.9	3.6	2	2	0.02	0.061	0.5	0.1	237	249	163	175	154	178	0.84
YP_005269540.1	bacitracin synthase 1 [Acetobacterium woodii DSM 1030]	bacitracin synthase 1	Acetobacterium woodii DSM 1030	Condensation	PF00668.16	Condensation_domain	301	gi|379011728|ref|YP_005269540.1|	-	2237	2e-47	149.3	0	1	2	0.00016	0.00049	6.9	0	191	271	30	112	15	120	0.87
YP_005269540.1	bacitracin synthase 1 [Acetobacterium woodii DSM 1030]	bacitracin synthase 1	Acetobacterium woodii DSM 1030	Condensation	PF00668.16	Condensation_domain	301	gi|379011728|ref|YP_005269540.1|	-	2237	2e-47	149.3	0	2	2	4.4e-45	1.3e-44	140.1	0	2	299	839	1116	838	1118	0.94
YP_005269584.1	3-oxoacyl-ACP synthase [Acetobacterium woodii DSM 1030]	3-oxoacyl-ACP synthase	Acetobacterium woodii DSM 1030	ketoacyl-synt	PF00109.22	Beta-ketoacyl_synthase_N-terminal_domain	253	gi|379011772|ref|YP_005269584.1|	-	420	1.4e-61	195.9	0.1	1	1	1.3e-61	2e-61	195.5	0.1	2	253	3	244	2	244	0.9
YP_005269584.1	3-oxoacyl-ACP synthase [Acetobacterium woodii DSM 1030]	3-oxoacyl-ACP synthase	Acetobacterium woodii DSM 1030	Ketoacyl-synt_C	PF02801.18	Beta-ketoacyl_synthase_C-terminal_domain	118	gi|379011772|ref|YP_005269584.1|	-	420	1.5e-33	103.1	0.7	1	1	2.2e-33	3.3e-33	102	0.7	1	117	252	370	252	371	0.91
YP_005270877.1	siderophore/surfactin synthetase-like protein [Acetobacterium woodii DSM 1030]	siderophore/surfactin synthetase-like protein	Acetobacterium woodii DSM 1030	Condensation	PF00668.16	Condensation_domain	301	gi|379013065|ref|YP_005270877.1|	-	424	1.5e-08	21.7	0.1	1	2	1.4e-05	4.1e-05	10.4	0	30	163	26	147	18	167	0.77
YP_005270877.1	siderophore/surfactin synthetase-like protein [Acetobacterium woodii DSM 1030]	siderophore/surfactin synthetase-like protein	Acetobacterium woodii DSM 1030	Condensation	PF00668.16	Condensation_domain	301	gi|379013065|ref|YP_005270877.1|	-	424	1.5e-08	21.7	0.1	2	2	4.3e-05	0.00013	8.8	0	224	263	207	246	177	286	0.78
YP_003827611.1	3-oxoacyl-(acyl-carrier-protein) synthase II [Acetohalobium arabaticum DSM 5501]	3-oxoacyl-(acyl-carrier-protein) synthase II	Acetohalobium arabaticum DSM 5501	ketoacyl-synt	PF00109.22	Beta-ketoacyl_synthase_N-terminal_domain	253	gi|302391791|ref|YP_003827611.1|	-	413	1.7e-63	202.2	3.1	1	1	1.9e-63	2.8e-63	201.5	3.1	2	253	3	246	2	246	0.91
YP_003827611.1	3-oxoacyl-(acyl-carrier-protein) synthase II [Acetohalobium arabaticum DSM 5501]	3-oxoacyl-(acyl-carrier-protein) synthase II	Acetohalobium arabaticum DSM 5501	Ketoacyl-synt_C	PF02801.18	Beta-ketoacyl_synthase_C-terminal_domain	118	gi|302391791|ref|YP_003827611.1|	-	413	3.2e-42	131.1	0.2	1	1	4.4e-42	6.7e-42	130.1	0.2	1	117	254	368	254	369	0.98
YP_003828408.1	acetyl-CoA acetyltransferase [Acetohalobium arabaticum DSM 5501]	acetyl-CoA acetyltransferase	Acetohalobium arabaticum DSM 5501	ketoacyl-synt	PF00109.22	Beta-ketoacyl_synthase_N-terminal_domain	253	gi|302392588|ref|YP_003828408.1|	-	392	2.2e-09	24.9	6.1	1	4	0.0057	0.017	2.4	0.1	90	131	28	69	20	78	0.82
YP_003828408.1	acetyl-CoA acetyltransferase [Acetohalobium arabaticum DSM 5501]	acetyl-CoA acetyltransferase	Acetohalobium arabaticum DSM 5501	ketoacyl-synt	PF00109.22	Beta-ketoacyl_synthase_N-terminal_domain	253	gi|302392588|ref|YP_003828408.1|	-	392	2.2e-09	24.9	6.1	2	4	9.2e-10	2.8e-09	24.6	0.3	164	206	77	119	67	134	0.88
YP_003828408.1	acetyl-CoA acetyltransferase [Acetohalobium arabaticum DSM 5501]	acetyl-CoA acetyltransferase	Acetohalobium arabaticum DSM 5501	ketoacyl-synt	PF00109.22	Beta-ketoacyl_synthase_N-terminal_domain	253	gi|302392588|ref|YP_003828408.1|	-	392	2.2e-09	24.9	6.1	3	4	0.083	0.25	-1.5	0	30	74	156	199	137	208	0.68
YP_003828408.1	acetyl-CoA acetyltransferase [Acetohalobium arabaticum DSM 5501]	acetyl-CoA acetyltransferase	Acetohalobium arabaticum DSM 5501	ketoacyl-synt	PF00109.22	Beta-ketoacyl_synthase_N-terminal_domain	253	gi|302392588|ref|YP_003828408.1|	-	392	2.2e-09	24.9	6.1	4	4	0.3	0.91	-3.3	0	235	253	247	265	234	265	0.72
YP_008656405.1	3-oxoacyl-[acyl-carrier-protein] synthase [Acholeplasma brassicae]	3-oxoacyl-acyl-carrier-protein synthase	Acholeplasma brassicae	ketoacyl-synt	PF00109.22	Beta-ketoacyl_synthase_N-terminal_domain	253	gi|651867118|ref|YP_008656405.1|	-	410	1.2e-49	156.8	0.1	1	2	3.7e-49	5.6e-49	154.6	0	2	253	3	245	2	245	0.89
YP_008656405.1	3-oxoacyl-[acyl-carrier-protein] synthase [Acholeplasma brassicae]	3-oxoacyl-acyl-carrier-protein synthase	Acholeplasma brassicae	ketoacyl-synt	PF00109.22	Beta-ketoacyl_synthase_N-terminal_domain	253	gi|651867118|ref|YP_008656405.1|	-	410	1.2e-49	156.8	0.1	2	2	0.067	0.1	-0.2	0	89	143	275	327	262	347	0.65
YP_008656405.1	3-oxoacyl-[acyl-carrier-protein] synthase [Acholeplasma brassicae]	3-oxoacyl-acyl-carrier-protein synthase	Acholeplasma brassicae	Ketoacyl-synt_C	PF02801.18	Beta-ketoacyl_synthase_C-terminal_domain	118	gi|651867118|ref|YP_008656405.1|	-	410	7.5e-42	129.9	0.3	1	1	1e-41	1.5e-41	128.9	0.3	1	117	253	367	253	368	0.98
YP_008656969.1	Acetyl-CoA C-acetyltransferase [Acholeplasma brassicae]	Acetyl-CoA C-acetyltransferase	Acholeplasma brassicae	ketoacyl-synt	PF00109.22	Beta-ketoacyl_synthase_N-terminal_domain	253	gi|651867682|ref|YP_008656969.1|	-	404	4e-08	20.8	0	1	1	3.6e-08	1.1e-07	19.4	0	165	205	79	119	13	161	0.83
YP_001620456.1	beta-ketoacyl-(acyl carrier protein) synthase III [Acholeplasma laidlawii PG-8A]	beta-ketoacyl-(acyl carrier protein) synthase III	Acholeplasma laidlawii PG-8A	ketoacyl-synt	PF00109.22	Beta-ketoacyl_synthase_N-terminal_domain	253	gi|162447324|ref|YP_001620456.1|	-	310	9.7e-07	16.3	0.5	1	1	9.2e-07	2.8e-06	14.8	0.5	86	211	23	152	10	168	0.73
YP_001620459.1	beta-ketoacyl-(acyl carrier protein) synthetase [Acholeplasma laidlawii PG-8A]	beta-ketoacyl-(acyl carrier protein) synthetase	Acholeplasma laidlawii PG-8A	ketoacyl-synt	PF00109.22	Beta-ketoacyl_synthase_N-terminal_domain	253	gi|162447327|ref|YP_001620459.1|	-	412	1.9e-53	169.3	0	1	1	2.1e-53	3.1e-53	168.6	0	2	253	3	245	2	245	0.91
YP_001620459.1	beta-ketoacyl-(acyl carrier protein) synthetase [Acholeplasma laidlawii PG-8A]	beta-ketoacyl-(acyl carrier protein) synthetase	Acholeplasma laidlawii PG-8A	Ketoacyl-synt_C	PF02801.18	Beta-ketoacyl_synthase_C-terminal_domain	118	gi|162447327|ref|YP_001620459.1|	-	412	1.9e-39	122.2	0.2	1	1	2.1e-39	3.1e-39	121.5	0.2	1	117	253	367	253	368	0.99
YP_001620497.1	acetyl-CoA acetyltransferase, thiolase II [Acholeplasma laidlawii PG-8A]	acetyl-CoA acetyltransferase, thiolase II	Acholeplasma laidlawii PG-8A	ketoacyl-synt	PF00109.22	Beta-ketoacyl_synthase_N-terminal_domain	253	gi|162447365|ref|YP_001620497.1|	-	403	1.9e-06	15.3	0.1	1	1	1.7e-06	5.1e-06	13.9	0.1	115	206	14	119	6	127	0.67
YP_008636483.1	3-oxoacyl-[acyl-carrier-protein] synthase [Acholeplasma palmae J233]	3-oxoacyl-acyl-carrier-protein synthase	Acholeplasma palmae J233	ketoacyl-synt	PF00109.22	Beta-ketoacyl_synthase_N-terminal_domain	253	gi|651866337|ref|YP_008636483.1|	-	415	3.6e-56	178.2	0	1	2	4.5e-56	6.8e-56	177.3	0	2	253	4	247	3	247	0.91
YP_008636483.1	3-oxoacyl-[acyl-carrier-protein] synthase [Acholeplasma palmae J233]	3-oxoacyl-acyl-carrier-protein synthase	Acholeplasma palmae J233	ketoacyl-synt	PF00109.22	Beta-ketoacyl_synthase_N-terminal_domain	253	gi|651866337|ref|YP_008636483.1|	-	415	3.6e-56	178.2	0	2	2	0.48	0.72	-3	0	99	139	287	323	281	350	0.41
YP_008636483.1	3-oxoacyl-[acyl-carrier-protein] synthase [Acholeplasma palmae J233]	3-oxoacyl-acyl-carrier-protein synthase	Acholeplasma palmae J233	Ketoacyl-synt_C	PF02801.18	Beta-ketoacyl_synthase_C-terminal_domain	118	gi|651866337|ref|YP_008636483.1|	-	415	4.4e-37	114.5	0.4	1	1	5.3e-37	7.9e-37	113.7	0.4	1	117	255	369	255	370	0.98
YP_008636592.1	Acetyl-CoA acetyltransferase [Acholeplasma palmae J233]	Acetyl-CoA acetyltransferase	Acholeplasma palmae J233	ketoacyl-synt	PF00109.22	Beta-ketoacyl_synthase_N-terminal_domain	253	gi|651866446|ref|YP_008636592.1|	-	386	3.4e-08	21	0	1	1	2.6e-08	7.7e-08	19.9	0	166	206	80	120	37	131	0.92
YP_003977598.1	3-oxoacyl-[acyl-carrier-protein] synthase III [Achromobacter xylosoxidans A8]	3-oxoacyl-acyl-carrier-protein synthase III	Achromobacter xylosoxidans A8	ketoacyl-synt	PF00109.22	Beta-ketoacyl_synthase_N-terminal_domain	253	gi|311104745|ref|YP_003977598.1|	-	328	5.3e-06	13.8	11.4	1	2	0.00056	0.0017	5.6	0.1	83	111	56	84	37	92	0.84
YP_003977598.1	3-oxoacyl-[acyl-carrier-protein] synthase III [Achromobacter xylosoxidans A8]	3-oxoacyl-acyl-carrier-protein synthase III	Achromobacter xylosoxidans A8	ketoacyl-synt	PF00109.22	Beta-ketoacyl_synthase_N-terminal_domain	253	gi|311104745|ref|YP_003977598.1|	-	328	5.3e-06	13.8	11.4	2	2	0.00094	0.0028	4.9	7.4	155	204	101	151	89	181	0.87
YP_003977602.1	3-oxoacyl-[acyl-carrier-protein] synthase [Achromobacter xylosoxidans A8]	3-oxoacyl-acyl-carrier-protein synthase	Achromobacter xylosoxidans A8	ketoacyl-synt	PF00109.22	Beta-ketoacyl_synthase_N-terminal_domain	253	gi|311104749|ref|YP_003977602.1|	-	409	1.8e-67	215.3	0.1	1	1	1.8e-67	2.6e-67	214.7	0.1	2	253	3	246	2	246	0.94
YP_003977602.1	3-oxoacyl-[acyl-carrier-protein] synthase [Achromobacter xylosoxidans A8]	3-oxoacyl-acyl-carrier-protein synthase	Achromobacter xylosoxidans A8	Ketoacyl-synt_C	PF02801.18	Beta-ketoacyl_synthase_C-terminal_domain	118	gi|311104749|ref|YP_003977602.1|	-	409	6.6e-37	113.9	0.1	1	1	7.8e-37	1.2e-36	113.1	0.1	1	117	254	366	254	367	0.95
YP_003977756.1	thiolase, C-terminal domain-containing protein 2, partial [Achromobacter xylosoxidans A8]	thiolase, C-terminal domain-containing protein 2, partial	Achromobacter xylosoxidans A8	Ketoacyl-synt_C	PF02801.18	Beta-ketoacyl_synthase_C-terminal_domain	118	gi|311104903|ref|YP_003977756.1|	-	385	1.7e-07	19.1	0.2	1	3	2.5e-05	7.4e-05	10.6	0	6	50	13	55	9	57	0.76
YP_003977756.1	thiolase, C-terminal domain-containing protein 2, partial [Achromobacter xylosoxidans A8]	thiolase, C-terminal domain-containing protein 2, partial	Achromobacter xylosoxidans A8	Ketoacyl-synt_C	PF02801.18	Beta-ketoacyl_synthase_C-terminal_domain	118	gi|311104903|ref|YP_003977756.1|	-	385	1.7e-07	19.1	0.2	2	3	0.069	0.21	-0.6	0	45	73	152	180	148	189	0.77
YP_003977756.1	thiolase, C-terminal domain-containing protein 2, partial [Achromobacter xylosoxidans A8]	thiolase, C-terminal domain-containing protein 2, partial	Achromobacter xylosoxidans A8	Ketoacyl-synt_C	PF02801.18	Beta-ketoacyl_synthase_C-terminal_domain	118	gi|311104903|ref|YP_003977756.1|	-	385	1.7e-07	19.1	0.2	3	3	0.002	0.0059	4.4	0	26	48	261	283	237	289	0.83
YP_003978381.1	beta-ketoacyl synthase, C-terminal domain-containing protein 1, partial [Achromobacter xylosoxidans A8]	beta-ketoacyl synthase, C-terminal domain-containing protein 1, partial	Achromobacter xylosoxidans A8	ketoacyl-synt	PF00109.22	Beta-ketoacyl_synthase_N-terminal_domain	253	gi|311105528|ref|YP_003978381.1|	-	407	3.4e-49	155.3	1.6	1	2	3e-49	4.5e-49	154.9	0.7	1	253	1	246	1	246	0.86
YP_003978381.1	beta-ketoacyl synthase, C-terminal domain-containing protein 1, partial [Achromobacter xylosoxidans A8]	beta-ketoacyl synthase, C-terminal domain-containing protein 1, partial	Achromobacter xylosoxidans A8	ketoacyl-synt	PF00109.22	Beta-ketoacyl_synthase_N-terminal_domain	253	gi|311105528|ref|YP_003978381.1|	-	407	3.4e-49	155.3	1.6	2	2	0.21	0.31	-1.8	0	95	123	280	303	262	332	0.69
YP_003978381.1	beta-ketoacyl synthase, C-terminal domain-containing protein 1, partial [Achromobacter xylosoxidans A8]	beta-ketoacyl synthase, C-terminal domain-containing protein 1, partial	Achromobacter xylosoxidans A8	Ketoacyl-synt_C	PF02801.18	Beta-ketoacyl_synthase_C-terminal_domain	118	gi|311105528|ref|YP_003978381.1|	-	407	2e-32	99.5	0	1	2	0.18	0.27	-0.9	0	52	93	105	145	101	150	0.8
YP_003978381.1	beta-ketoacyl synthase, C-terminal domain-containing protein 1, partial [Achromobacter xylosoxidans A8]	beta-ketoacyl synthase, C-terminal domain-containing protein 1, partial	Achromobacter xylosoxidans A8	Ketoacyl-synt_C	PF02801.18	Beta-ketoacyl_synthase_C-terminal_domain	118	gi|311105528|ref|YP_003978381.1|	-	407	2e-32	99.5	0	2	2	6.1e-32	9.1e-32	97.4	0	1	117	254	363	254	364	0.96
YP_003978384.1	beta-ketoacyl synthase, C-terminal domain-containing protein 2, partial [Achromobacter xylosoxidans A8]	beta-ketoacyl synthase, C-terminal domain-containing protein 2, partial	Achromobacter xylosoxidans A8	ketoacyl-synt	PF00109.22	Beta-ketoacyl_synthase_N-terminal_domain	253	gi|311105531|ref|YP_003978384.1|	-	399	9.2e-23	68.8	0.5	1	2	6.1e-23	9.2e-23	68.8	0.5	113	252	94	232	70	233	0.82
YP_003978384.1	beta-ketoacyl synthase, C-terminal domain-containing protein 2, partial [Achromobacter xylosoxidans A8]	beta-ketoacyl synthase, C-terminal domain-containing protein 2, partial	Achromobacter xylosoxidans A8	ketoacyl-synt	PF00109.22	Beta-ketoacyl_synthase_N-terminal_domain	253	gi|311105531|ref|YP_003978384.1|	-	399	9.2e-23	68.8	0.5	2	2	0.38	0.57	-2.6	0.2	96	135	266	302	262	340	0.56
YP_003978384.1	beta-ketoacyl synthase, C-terminal domain-containing protein 2, partial [Achromobacter xylosoxidans A8]	beta-ketoacyl synthase, C-terminal domain-containing protein 2, partial	Achromobacter xylosoxidans A8	Ketoacyl-synt_C	PF02801.18	Beta-ketoacyl_synthase_C-terminal_domain	118	gi|311105531|ref|YP_003978384.1|	-	399	2.5e-26	79.8	3.7	1	1	3.2e-26	4.8e-26	78.9	3.7	5	106	241	337	238	342	0.92
YP_003978600.1	acetyl-CoA C-acyltransferase [Achromobacter xylosoxidans A8]	acetyl-CoA C-acyltransferase	Achromobacter xylosoxidans A8	ketoacyl-synt	PF00109.22	Beta-ketoacyl_synthase_N-terminal_domain	253	gi|311105747|ref|YP_003978600.1|	-	412	1.2e-09	25.8	3.5	1	3	0.019	0.057	0.6	0.1	91	112	27	48	12	63	0.77
YP_003978600.1	acetyl-CoA C-acyltransferase [Achromobacter xylosoxidans A8]	acetyl-CoA C-acyltransferase	Achromobacter xylosoxidans A8	ketoacyl-synt	PF00109.22	Beta-ketoacyl_synthase_N-terminal_domain	253	gi|311105747|ref|YP_003978600.1|	-	412	1.2e-09	25.8	3.5	2	3	3.9e-10	1.2e-09	25.8	3.5	151	215	62	128	49	135	0.89
YP_003978600.1	acetyl-CoA C-acyltransferase [Achromobacter xylosoxidans A8]	acetyl-CoA C-acyltransferase	Achromobacter xylosoxidans A8	ketoacyl-synt	PF00109.22	Beta-ketoacyl_synthase_N-terminal_domain	253	gi|311105747|ref|YP_003978600.1|	-	412	1.2e-09	25.8	3.5	3	3	0.064	0.19	-1.1	0	89	112	280	303	272	322	0.81
YP_003978631.1	amino acid adenylation domain-containing protein 2 [Achromobacter xylosoxidans A8]	amino acid adenylation domain-containing protein 2	Achromobacter xylosoxidans A8	Condensation	PF00668.16	Condensation_domain	301	gi|311105778|ref|YP_003978631.1|	-	1753	2.2e-75	241.1	0	1	1	1.1e-75	3.3e-75	240.6	0	3	300	694	994	692	995	0.94
YP_003978632.1	linear gramicidin synthetase subunit C [Achromobacter xylosoxidans A8]	linear gramicidin synthetase subunit C	Achromobacter xylosoxidans A8	Condensation	PF00668.16	Condensation_domain	301	gi|311105779|ref|YP_003978632.1|	-	2608	6.7e-177	574.5	0	1	3	1.2e-66	3.6e-66	210.9	0	4	301	47	348	44	348	0.97
YP_003978632.1	linear gramicidin synthetase subunit C [Achromobacter xylosoxidans A8]	linear gramicidin synthetase subunit C	Achromobacter xylosoxidans A8	Condensation	PF00668.16	Condensation_domain	301	gi|311105779|ref|YP_003978632.1|	-	2608	6.7e-177	574.5	0	2	3	1e-50	3.1e-50	158.6	0	9	300	1100	1392	1096	1393	0.91
YP_003978632.1	linear gramicidin synthetase subunit C [Achromobacter xylosoxidans A8]	linear gramicidin synthetase subunit C	Achromobacter xylosoxidans A8	Condensation	PF00668.16	Condensation_domain	301	gi|311105779|ref|YP_003978632.1|	-	2608	6.7e-177	574.5	0	3	3	8.9e-64	2.7e-63	201.5	0	3	300	1563	1850	1561	1851	0.91
YP_003978633.1	syringomycin synthetase [Achromobacter xylosoxidans A8]	syringomycin synthetase	Achromobacter xylosoxidans A8	Condensation	PF00668.16	Condensation_domain	301	gi|311105780|ref|YP_003978633.1|	-	2452	4e-119	384.8	0	1	2	4.4e-71	1.3e-70	225.5	0	8	297	54	347	51	350	0.97
YP_003978633.1	syringomycin synthetase [Achromobacter xylosoxidans A8]	syringomycin synthetase	Achromobacter xylosoxidans A8	Condensation	PF00668.16	Condensation_domain	301	gi|311105780|ref|YP_003978633.1|	-	2452	4e-119	384.8	0	2	2	3.1e-50	9.4e-50	157	0	2	300	1147	1440	1146	1441	0.92
YP_003979467.1	thiolase, C-terminal domain-containing protein 5, partial [Achromobacter xylosoxidans A8]	thiolase, C-terminal domain-containing protein 5, partial	Achromobacter xylosoxidans A8	Ketoacyl-synt_C	PF02801.18	Beta-ketoacyl_synthase_C-terminal_domain	118	gi|311106614|ref|YP_003979467.1|	-	385	2.6e-06	15.2	0	1	2	0.032	0.096	0.5	0	30	45	37	52	13	55	0.85
YP_003979467.1	thiolase, C-terminal domain-containing protein 5, partial [Achromobacter xylosoxidans A8]	thiolase, C-terminal domain-containing protein 5, partial	Achromobacter xylosoxidans A8	Ketoacyl-synt_C	PF02801.18	Beta-ketoacyl_synthase_C-terminal_domain	118	gi|311106614|ref|YP_003979467.1|	-	385	2.6e-06	15.2	0	2	2	9.7e-06	2.9e-05	11.9	0	3	49	233	280	231	285	0.82
YP_003979686.1	acetyl-CoA acetyltransferase [Achromobacter xylosoxidans A8]	acetyl-CoA acetyltransferase	Achromobacter xylosoxidans A8	ketoacyl-synt	PF00109.22	Beta-ketoacyl_synthase_N-terminal_domain	253	gi|311106833|ref|YP_003979686.1|	-	393	1.5e-07	18.9	0.7	1	4	0.2	0.6	-2.7	0	91	112	30	51	29	66	0.75
YP_003979686.1	acetyl-CoA acetyltransferase [Achromobacter xylosoxidans A8]	acetyl-CoA acetyltransferase	Achromobacter xylosoxidans A8	ketoacyl-synt	PF00109.22	Beta-ketoacyl_synthase_N-terminal_domain	253	gi|311106833|ref|YP_003979686.1|	-	393	1.5e-07	18.9	0.7	2	4	4.9e-08	1.5e-07	18.9	0.7	174	206	89	121	82	128	0.89
YP_003979686.1	acetyl-CoA acetyltransferase [Achromobacter xylosoxidans A8]	acetyl-CoA acetyltransferase	Achromobacter xylosoxidans A8	ketoacyl-synt	PF00109.22	Beta-ketoacyl_synthase_N-terminal_domain	253	gi|311106833|ref|YP_003979686.1|	-	393	1.5e-07	18.9	0.7	3	4	0.038	0.11	-0.3	0.2	230	253	242	265	212	265	0.74
YP_003979686.1	acetyl-CoA acetyltransferase [Achromobacter xylosoxidans A8]	acetyl-CoA acetyltransferase	Achromobacter xylosoxidans A8	ketoacyl-synt	PF00109.22	Beta-ketoacyl_synthase_N-terminal_domain	253	gi|311106833|ref|YP_003979686.1|	-	393	1.5e-07	18.9	0.7	4	4	0.022	0.066	0.4	0	150	178	354	382	328	390	0.8
YP_003979910.1	thiolase, N-terminal domain-containing protein, partial [Achromobacter xylosoxidans A8]	thiolase, N-terminal domain-containing protein, partial	Achromobacter xylosoxidans A8	ketoacyl-synt	PF00109.22	Beta-ketoacyl_synthase_N-terminal_domain	253	gi|311107057|ref|YP_003979910.1|	-	397	1.3e-08	22.4	2.8	1	2	0.0003	0.00091	6.5	0	77	126	11	60	5	70	0.81
YP_003979910.1	thiolase, N-terminal domain-containing protein, partial [Achromobacter xylosoxidans A8]	thiolase, N-terminal domain-containing protein, partial	Achromobacter xylosoxidans A8	ketoacyl-synt	PF00109.22	Beta-ketoacyl_synthase_N-terminal_domain	253	gi|311107057|ref|YP_003979910.1|	-	397	1.3e-08	22.4	2.8	2	2	7.8e-07	2.3e-06	15	1.3	167	205	72	110	58	118	0.9
YP_003979979.1	acetyl-CoA acetyltransferase [Achromobacter xylosoxidans A8]	acetyl-CoA acetyltransferase	Achromobacter xylosoxidans A8	ketoacyl-synt	PF00109.22	Beta-ketoacyl_synthase_N-terminal_domain	253	gi|311107126|ref|YP_003979979.1|	-	384	5.4e-08	20.4	2.4	1	3	2.5e-08	7.5e-08	19.9	0.2	171	206	85	120	80	127	0.88
YP_003979979.1	acetyl-CoA acetyltransferase [Achromobacter xylosoxidans A8]	acetyl-CoA acetyltransferase	Achromobacter xylosoxidans A8	ketoacyl-synt	PF00109.22	Beta-ketoacyl_synthase_N-terminal_domain	253	gi|311107126|ref|YP_003979979.1|	-	384	5.4e-08	20.4	2.4	2	3	0.26	0.79	-3.1	0	234	251	237	254	233	256	0.75
YP_003979979.1	acetyl-CoA acetyltransferase [Achromobacter xylosoxidans A8]	acetyl-CoA acetyltransferase	Achromobacter xylosoxidans A8	ketoacyl-synt	PF00109.22	Beta-ketoacyl_synthase_N-terminal_domain	253	gi|311107126|ref|YP_003979979.1|	-	384	5.4e-08	20.4	2.4	3	3	0.12	0.35	-1.9	0	92	110	284	302	275	326	0.8
YP_003980170.1	beta-ketoadipyl CoA thiolase 1 [Achromobacter xylosoxidans A8]	beta-ketoadipyl CoA thiolase 1	Achromobacter xylosoxidans A8	ketoacyl-synt	PF00109.22	Beta-ketoacyl_synthase_N-terminal_domain	253	gi|311107317|ref|YP_003980170.1|	-	401	5.9e-09	23.5	0.5	1	1	4.3e-09	1.3e-08	22.4	0.5	170	215	86	130	75	143	0.78
YP_003980454.1	aconitate hydratase [Achromobacter xylosoxidans A8]	aconitate hydratase	Achromobacter xylosoxidans A8	Ketoacyl-synt_C	PF02801.18	Beta-ketoacyl_synthase_C-terminal_domain	118	gi|311107601|ref|YP_003980454.1|	-	863	8.3e-06	13.6	0	1	1	5.8e-06	1.8e-05	12.6	0	57	95	689	725	686	729	0.9
YP_003980531.1	acetyl-CoA acetyltransferase [Achromobacter xylosoxidans A8]	acetyl-CoA acetyltransferase	Achromobacter xylosoxidans A8	ketoacyl-synt	PF00109.22	Beta-ketoacyl_synthase_N-terminal_domain	253	gi|311107678|ref|YP_003980531.1|	-	431	1.2e-09	25.8	0.1	1	2	1.5e-09	4.6e-09	23.9	0.1	169	208	84	123	67	138	0.82
YP_003980531.1	acetyl-CoA acetyltransferase [Achromobacter xylosoxidans A8]	acetyl-CoA acetyltransferase	Achromobacter xylosoxidans A8	ketoacyl-synt	PF00109.22	Beta-ketoacyl_synthase_N-terminal_domain	253	gi|311107678|ref|YP_003980531.1|	-	431	1.2e-09	25.8	0.1	2	2	0.14	0.41	-2.2	0	65	106	246	288	219	292	0.69
YP_003980535.1	acetyl-CoA acetyltransferase [Achromobacter xylosoxidans A8]	acetyl-CoA acetyltransferase	Achromobacter xylosoxidans A8	ketoacyl-synt	PF00109.22	Beta-ketoacyl_synthase_N-terminal_domain	253	gi|311107682|ref|YP_003980535.1|	-	399	2.2e-08	21.6	1.2	1	1	1.8e-08	5.5e-08	20.3	1	170	206	89	125	84	148	0.84
YP_003980794.1	acetyl-CoA acetyltransferase [Achromobacter xylosoxidans A8]	acetyl-CoA acetyltransferase	Achromobacter xylosoxidans A8	ketoacyl-synt	PF00109.22	Beta-ketoacyl_synthase_N-terminal_domain	253	gi|311107941|ref|YP_003980794.1|	-	398	7.2e-08	20	0.9	1	3	0.019	0.057	0.6	0	90	125	32	67	29	78	0.76
YP_003980794.1	acetyl-CoA acetyltransferase [Achromobacter xylosoxidans A8]	acetyl-CoA acetyltransferase	Achromobacter xylosoxidans A8	ketoacyl-synt	PF00109.22	Beta-ketoacyl_synthase_N-terminal_domain	253	gi|311107941|ref|YP_003980794.1|	-	398	7.2e-08	20	0.9	2	3	2.4e-08	7.2e-08	20	0.9	170	208	87	125	82	138	0.87
YP_003980794.1	acetyl-CoA acetyltransferase [Achromobacter xylosoxidans A8]	acetyl-CoA acetyltransferase	Achromobacter xylosoxidans A8	ketoacyl-synt	PF00109.22	Beta-ketoacyl_synthase_N-terminal_domain	253	gi|311107941|ref|YP_003980794.1|	-	398	7.2e-08	20	0.9	3	3	0.12	0.35	-2	0.1	175	252	251	269	236	272	0.62
YP_003980807.1	acetyl-CoA acetyltransferase [Achromobacter xylosoxidans A8]	acetyl-CoA acetyltransferase	Achromobacter xylosoxidans A8	ketoacyl-synt	PF00109.22	Beta-ketoacyl_synthase_N-terminal_domain	253	gi|311107954|ref|YP_003980807.1|	-	401	9.9e-07	16.2	4.5	1	4	0.1	0.31	-1.8	0	2	12	7	17	6	26	0.87
YP_003980807.1	acetyl-CoA acetyltransferase [Achromobacter xylosoxidans A8]	acetyl-CoA acetyltransferase	Achromobacter xylosoxidans A8	ketoacyl-synt	PF00109.22	Beta-ketoacyl_synthase_N-terminal_domain	253	gi|311107954|ref|YP_003980807.1|	-	401	9.9e-07	16.2	4.5	2	4	0.0021	0.0063	3.8	0	89	123	28	58	20	74	0.78
YP_003980807.1	acetyl-CoA acetyltransferase [Achromobacter xylosoxidans A8]	acetyl-CoA acetyltransferase	Achromobacter xylosoxidans A8	ketoacyl-synt	PF00109.22	Beta-ketoacyl_synthase_N-terminal_domain	253	gi|311107954|ref|YP_003980807.1|	-	401	9.9e-07	16.2	4.5	3	4	4.8e-06	1.4e-05	12.4	0.5	171	204	84	117	74	129	0.86
YP_003980807.1	acetyl-CoA acetyltransferase [Achromobacter xylosoxidans A8]	acetyl-CoA acetyltransferase	Achromobacter xylosoxidans A8	ketoacyl-synt	PF00109.22	Beta-ketoacyl_synthase_N-terminal_domain	253	gi|311107954|ref|YP_003980807.1|	-	401	9.9e-07	16.2	4.5	4	4	0.15	0.45	-2.3	0	90	118	352	379	349	385	0.83
YP_003980818.1	thiolase, C-terminal domain-containing protein 7, partial [Achromobacter xylosoxidans A8]	thiolase, C-terminal domain-containing protein 7, partial	Achromobacter xylosoxidans A8	ketoacyl-synt	PF00109.22	Beta-ketoacyl_synthase_N-terminal_domain	253	gi|311107965|ref|YP_003980818.1|	-	394	1.3e-07	19.1	4.3	1	2	0.0027	0.004	4.4	0.2	88	122	24	58	8	64	0.81
YP_003980818.1	thiolase, C-terminal domain-containing protein 7, partial [Achromobacter xylosoxidans A8]	thiolase, C-terminal domain-containing protein 7, partial	Achromobacter xylosoxidans A8	ketoacyl-synt	PF00109.22	Beta-ketoacyl_synthase_N-terminal_domain	253	gi|311107965|ref|YP_003980818.1|	-	394	1.3e-07	19.1	4.3	2	2	1.1e-06	1.6e-06	15.5	1.8	153	205	59	112	51	120	0.86
YP_003980818.1	thiolase, C-terminal domain-containing protein 7, partial [Achromobacter xylosoxidans A8]	thiolase, C-terminal domain-containing protein 7, partial	Achromobacter xylosoxidans A8	Ketoacyl-synt_C	PF02801.18	Beta-ketoacyl_synthase_C-terminal_domain	118	gi|311107965|ref|YP_003980818.1|	-	394	6.6e-08	20.4	0.3	1	3	0.076	0.11	0.3	0	27	45	29	47	16	55	0.84
YP_003980818.1	thiolase, C-terminal domain-containing protein 7, partial [Achromobacter xylosoxidans A8]	thiolase, C-terminal domain-containing protein 7, partial	Achromobacter xylosoxidans A8	Ketoacyl-synt_C	PF02801.18	Beta-ketoacyl_synthase_C-terminal_domain	118	gi|311107965|ref|YP_003980818.1|	-	394	6.6e-08	20.4	0.3	2	3	2.4e-05	3.5e-05	11.6	0	26	52	269	295	242	300	0.86
YP_003980818.1	thiolase, C-terminal domain-containing protein 7, partial [Achromobacter xylosoxidans A8]	thiolase, C-terminal domain-containing protein 7, partial	Achromobacter xylosoxidans A8	Ketoacyl-synt_C	PF02801.18	Beta-ketoacyl_synthase_C-terminal_domain	118	gi|311107965|ref|YP_003980818.1|	-	394	6.6e-08	20.4	0.3	3	3	0.0051	0.0076	4.1	0	88	109	342	363	340	368	0.91
YP_003982691.1	beta-ketoadipyl CoA thiolase 2 [Achromobacter xylosoxidans A8]	beta-ketoadipyl CoA thiolase 2	Achromobacter xylosoxidans A8	ketoacyl-synt	PF00109.22	Beta-ketoacyl_synthase_N-terminal_domain	253	gi|311109840|ref|YP_003982691.1|	-	400	3.3e-08	21.1	0.8	1	1	2.5e-08	7.6e-08	19.9	0.8	170	208	85	123	60	139	0.84
YP_003982720.1	thiolase family protein [Achromobacter xylosoxidans A8]	thiolase family protein	Achromobacter xylosoxidans A8	ketoacyl-synt	PF00109.22	Beta-ketoacyl_synthase_N-terminal_domain	253	gi|311109869|ref|YP_003982720.1|	-	398	1.4e-06	15.8	0.3	1	2	1.4e-06	4.1e-06	14.2	0.1	163	207	81	125	60	145	0.83
YP_003982720.1	thiolase family protein [Achromobacter xylosoxidans A8]	thiolase family protein	Achromobacter xylosoxidans A8	ketoacyl-synt	PF00109.22	Beta-ketoacyl_synthase_N-terminal_domain	253	gi|311109869|ref|YP_003982720.1|	-	398	1.4e-06	15.8	0.3	2	2	0.22	0.65	-2.8	0	238	251	220	233	220	235	0.85
YP_008921881.1	Thiolase [Achromobacter xylosoxidans NBRC 15126 = ATCC 27061]	Thiolase	Achromobacter xylosoxidans NBRC 15126 = ATCC 27061	Ketoacyl-synt_C	PF02801.18	Beta-ketoacyl_synthase_C-terminal_domain	118	gi|568125234|ref|YP_008921881.1|	-	382	1.7e-07	19.1	6.7	1	4	0.0029	0.0087	3.9	0	4	47	9	50	6	58	0.78
YP_008921881.1	Thiolase [Achromobacter xylosoxidans NBRC 15126 = ATCC 27061]	Thiolase	Achromobacter xylosoxidans NBRC 15126 = ATCC 27061	Ketoacyl-synt_C	PF02801.18	Beta-ketoacyl_synthase_C-terminal_domain	118	gi|568125234|ref|YP_008921881.1|	-	382	1.7e-07	19.1	6.7	2	4	0.00041	0.0012	6.6	0.1	49	73	156	180	152	191	0.84
YP_008921881.1	Thiolase [Achromobacter xylosoxidans NBRC 15126 = ATCC 27061]	Thiolase	Achromobacter xylosoxidans NBRC 15126 = ATCC 27061	Ketoacyl-synt_C	PF02801.18	Beta-ketoacyl_synthase_C-terminal_domain	118	gi|568125234|ref|YP_008921881.1|	-	382	1.7e-07	19.1	6.7	3	4	4.5e-05	0.00014	9.7	0	23	47	250	274	228	281	0.74
YP_008921881.1	Thiolase [Achromobacter xylosoxidans NBRC 15126 = ATCC 27061]	Thiolase	Achromobacter xylosoxidans NBRC 15126 = ATCC 27061	Ketoacyl-synt_C	PF02801.18	Beta-ketoacyl_synthase_C-terminal_domain	118	gi|568125234|ref|YP_008921881.1|	-	382	1.7e-07	19.1	6.7	4	4	0.13	0.38	-1.4	0.7	87	106	325	344	324	348	0.83
YP_008921888.1	Acetyl-CoA C-acyltransferase [Achromobacter xylosoxidans NBRC 15126 = ATCC 27061]	Acetyl-CoA C-acyltransferase	Achromobacter xylosoxidans NBRC 15126 = ATCC 27061	ketoacyl-synt	PF00109.22	Beta-ketoacyl_synthase_N-terminal_domain	253	gi|568125241|ref|YP_008921888.1|	-	393	4.1e-06	14.2	4.2	1	3	0.0028	0.0084	3.4	0	90	126	29	65	26	78	0.8
YP_008921888.1	Acetyl-CoA C-acyltransferase [Achromobacter xylosoxidans NBRC 15126 = ATCC 27061]	Acetyl-CoA C-acyltransferase	Achromobacter xylosoxidans NBRC 15126 = ATCC 27061	ketoacyl-synt	PF00109.22	Beta-ketoacyl_synthase_N-terminal_domain	253	gi|568125241|ref|YP_008921888.1|	-	393	4.1e-06	14.2	4.2	2	3	5.2e-05	0.00016	9	0.7	171	210	85	124	78	162	0.82
YP_008921888.1	Acetyl-CoA C-acyltransferase [Achromobacter xylosoxidans NBRC 15126 = ATCC 27061]	Acetyl-CoA C-acyltransferase	Achromobacter xylosoxidans NBRC 15126 = ATCC 27061	ketoacyl-synt	PF00109.22	Beta-ketoacyl_synthase_N-terminal_domain	253	gi|568125241|ref|YP_008921888.1|	-	393	4.1e-06	14.2	4.2	3	3	0.016	0.048	0.9	0	234	253	246	265	233	265	0.76
YP_008922963.1	iron aquisition yersiniabactin synthesis enzyme (Irp2) [Achromobacter xylosoxidans NBRC 15126 = ATCC 27061]	iron aquisition yersiniabactin synthesis enzyme (Irp2)	Achromobacter xylosoxidans NBRC 15126 = ATCC 27061	Condensation	PF00668.16	Condensation_domain	301	gi|568126316|ref|YP_008922963.1|	-	2051	3.2e-92	296.5	0	1	2	1.9e-50	5.8e-50	157.7	0	5	298	91	383	88	386	0.91
YP_008922963.1	iron aquisition yersiniabactin synthesis enzyme (Irp2) [Achromobacter xylosoxidans NBRC 15126 = ATCC 27061]	iron aquisition yersiniabactin synthesis enzyme (Irp2)	Achromobacter xylosoxidans NBRC 15126 = ATCC 27061	Condensation	PF00668.16	Condensation_domain	301	gi|568126316|ref|YP_008922963.1|	-	2051	3.2e-92	296.5	0	2	2	5e-44	1.5e-43	136.6	0	5	298	1492	1778	1489	1781	0.9
YP_008922964.1	iron aquisition yersiniabactin synthesis enzyme (Irp1,polyketide synthetase) [Achromobacter xylosoxidans NBRC 15126 = ATCC 27061]	iron aquisition yersiniabactin synthesis enzyme (Irp1,polyketide synthetase)	Achromobacter xylosoxidans NBRC 15126 = ATCC 27061	ketoacyl-synt	PF00109.22	Beta-ketoacyl_synthase_N-terminal_domain	253	gi|568126317|ref|YP_008922964.1|	-	3240	5.7e-72	230	0.2	1	1	1.4e-71	1.4e-71	228.7	0.2	2	253	15	264	14	264	0.92
YP_008922964.1	iron aquisition yersiniabactin synthesis enzyme (Irp1,polyketide synthetase) [Achromobacter xylosoxidans NBRC 15126 = ATCC 27061]	iron aquisition yersiniabactin synthesis enzyme (Irp1,polyketide synthetase)	Achromobacter xylosoxidans NBRC 15126 = ATCC 27061	Condensation	PF00668.16	Condensation_domain	301	gi|568126317|ref|YP_008922964.1|	-	3240	4.7e-47	148.1	0	1	1	8e-47	8e-47	147.4	0	4	299	1959	2254	1957	2256	0.87
YP_008922964.1	iron aquisition yersiniabactin synthesis enzyme (Irp1,polyketide synthetase) [Achromobacter xylosoxidans NBRC 15126 = ATCC 27061]	iron aquisition yersiniabactin synthesis enzyme (Irp1,polyketide synthetase)	Achromobacter xylosoxidans NBRC 15126 = ATCC 27061	Ketoacyl-synt_C	PF02801.18	Beta-ketoacyl_synthase_C-terminal_domain	118	gi|568126317|ref|YP_008922964.1|	-	3240	2e-40	125.3	0.2	1	1	6.4e-40	6.4e-40	123.7	0.2	2	117	273	389	272	390	0.98
YP_008923222.1	3-oxoacyl-[acyl-carrier-protein] synthase, KASIII [Achromobacter xylosoxidans NBRC 15126 = ATCC 27061]	3-oxoacyl-acyl-carrier-protein synthase, KASIII	Achromobacter xylosoxidans NBRC 15126 = ATCC 27061	ketoacyl-synt	PF00109.22	Beta-ketoacyl_synthase_N-terminal_domain	253	gi|568126575|ref|YP_008923222.1|	-	328	3.1e-06	14.6	10.5	1	3	0.00028	0.00084	6.6	0.1	83	111	56	84	45	94	0.83
YP_008923222.1	3-oxoacyl-[acyl-carrier-protein] synthase, KASIII [Achromobacter xylosoxidans NBRC 15126 = ATCC 27061]	3-oxoacyl-acyl-carrier-protein synthase, KASIII	Achromobacter xylosoxidans NBRC 15126 = ATCC 27061	ketoacyl-synt	PF00109.22	Beta-ketoacyl_synthase_N-terminal_domain	253	gi|568126575|ref|YP_008923222.1|	-	328	3.1e-06	14.6	10.5	2	3	3.6e-05	0.00011	9.6	1.8	155	204	101	151	87	163	0.86
YP_008923222.1	3-oxoacyl-[acyl-carrier-protein] synthase, KASIII [Achromobacter xylosoxidans NBRC 15126 = ATCC 27061]	3-oxoacyl-acyl-carrier-protein synthase, KASIII	Achromobacter xylosoxidans NBRC 15126 = ATCC 27061	ketoacyl-synt	PF00109.22	Beta-ketoacyl_synthase_N-terminal_domain	253	gi|568126575|ref|YP_008923222.1|	-	328	3.1e-06	14.6	10.5	3	3	0.0036	0.011	3	0.1	236	250	165	179	153	181	0.83
YP_008923226.1	3-oxoacyl-[acyl-carrier-protein] synthase, KASII [Achromobacter xylosoxidans NBRC 15126 = ATCC 27061]	3-oxoacyl-acyl-carrier-protein synthase, KASII	Achromobacter xylosoxidans NBRC 15126 = ATCC 27061	ketoacyl-synt	PF00109.22	Beta-ketoacyl_synthase_N-terminal_domain	253	gi|568126579|ref|YP_008923226.1|	-	409	1.5e-68	218.7	0.2	1	1	1.7e-68	2.5e-68	218.1	0.2	2	253	3	246	2	246	0.94
YP_008923226.1	3-oxoacyl-[acyl-carrier-protein] synthase, KASII [Achromobacter xylosoxidans NBRC 15126 = ATCC 27061]	3-oxoacyl-acyl-carrier-protein synthase, KASII	Achromobacter xylosoxidans NBRC 15126 = ATCC 27061	Ketoacyl-synt_C	PF02801.18	Beta-ketoacyl_synthase_C-terminal_domain	118	gi|568126579|ref|YP_008923226.1|	-	409	3.7e-36	111.5	0	1	1	5.4e-36	8e-36	110.4	0	1	117	254	366	254	367	0.95
YP_008923909.1	3-oxoacyl-[ACP] synthase [Achromobacter xylosoxidans NBRC 15126 = ATCC 27061]	3-oxoacyl-ACP synthase	Achromobacter xylosoxidans NBRC 15126 = ATCC 27061	ketoacyl-synt	PF00109.22	Beta-ketoacyl_synthase_N-terminal_domain	253	gi|568127262|ref|YP_008923909.1|	-	407	8.5e-50	157.3	0.9	1	2	4.4e-49	6.6e-49	154.4	0.4	2	253	2	246	1	246	0.86
YP_008923909.1	3-oxoacyl-[ACP] synthase [Achromobacter xylosoxidans NBRC 15126 = ATCC 27061]	3-oxoacyl-ACP synthase	Achromobacter xylosoxidans NBRC 15126 = ATCC 27061	ketoacyl-synt	PF00109.22	Beta-ketoacyl_synthase_N-terminal_domain	253	gi|568127262|ref|YP_008923909.1|	-	407	8.5e-50	157.3	0.9	2	2	0.024	0.035	1.3	0	87	124	272	304	259	339	0.7
YP_008923909.1	3-oxoacyl-[ACP] synthase [Achromobacter xylosoxidans NBRC 15126 = ATCC 27061]	3-oxoacyl-ACP synthase	Achromobacter xylosoxidans NBRC 15126 = ATCC 27061	Ketoacyl-synt_C	PF02801.18	Beta-ketoacyl_synthase_C-terminal_domain	118	gi|568127262|ref|YP_008923909.1|	-	407	1.1e-32	100.3	0	1	2	0.16	0.25	-0.8	0	51	93	104	145	73	150	0.73
YP_008923909.1	3-oxoacyl-[ACP] synthase [Achromobacter xylosoxidans NBRC 15126 = ATCC 27061]	3-oxoacyl-ACP synthase	Achromobacter xylosoxidans NBRC 15126 = ATCC 27061	Ketoacyl-synt_C	PF02801.18	Beta-ketoacyl_synthase_C-terminal_domain	118	gi|568127262|ref|YP_008923909.1|	-	407	1.1e-32	100.3	0	2	2	3.2e-32	4.9e-32	98.2	0	1	117	254	363	254	364	0.96
YP_008923912.1	3-oxoacyl-[ACP] synthase FabV [Achromobacter xylosoxidans NBRC 15126 = ATCC 27061]	3-oxoacyl-ACP synthase FabV	Achromobacter xylosoxidans NBRC 15126 = ATCC 27061	ketoacyl-synt	PF00109.22	Beta-ketoacyl_synthase_N-terminal_domain	253	gi|568127265|ref|YP_008923912.1|	-	400	1.7e-23	71.1	1.7	1	2	1.2e-23	1.7e-23	71.1	1.7	111	251	93	233	60	235	0.77
YP_008923912.1	3-oxoacyl-[ACP] synthase FabV [Achromobacter xylosoxidans NBRC 15126 = ATCC 27061]	3-oxoacyl-ACP synthase FabV	Achromobacter xylosoxidans NBRC 15126 = ATCC 27061	ketoacyl-synt	PF00109.22	Beta-ketoacyl_synthase_N-terminal_domain	253	gi|568127265|ref|YP_008923912.1|	-	400	1.7e-23	71.1	1.7	2	2	0.53	0.8	-3.1	0.1	92	110	263	281	262	302	0.73
YP_008923912.1	3-oxoacyl-[ACP] synthase FabV [Achromobacter xylosoxidans NBRC 15126 = ATCC 27061]	3-oxoacyl-ACP synthase FabV	Achromobacter xylosoxidans NBRC 15126 = ATCC 27061	Ketoacyl-synt_C	PF02801.18	Beta-ketoacyl_synthase_C-terminal_domain	118	gi|568127265|ref|YP_008923912.1|	-	400	1.5e-26	80.5	0.3	1	1	2.2e-26	3.2e-26	79.5	0.3	5	106	242	338	239	351	0.9
YP_008924074.1	3-ketoacyl-CoA thiolase [Achromobacter xylosoxidans NBRC 15126 = ATCC 27061]	3-ketoacyl-CoA thiolase	Achromobacter xylosoxidans NBRC 15126 = ATCC 27061	ketoacyl-synt	PF00109.22	Beta-ketoacyl_synthase_N-terminal_domain	253	gi|568127427|ref|YP_008924074.1|	-	390	1.3e-08	22.4	4.8	1	4	0.0022	0.0034	4.7	0.1	91	124	26	55	20	77	0.72
YP_008924074.1	3-ketoacyl-CoA thiolase [Achromobacter xylosoxidans NBRC 15126 = ATCC 27061]	3-ketoacyl-CoA thiolase	Achromobacter xylosoxidans NBRC 15126 = ATCC 27061	ketoacyl-synt	PF00109.22	Beta-ketoacyl_synthase_N-terminal_domain	253	gi|568127427|ref|YP_008924074.1|	-	390	1.3e-08	22.4	4.8	2	4	1.9e-07	2.8e-07	18	0.7	167	207	78	118	75	127	0.89
YP_008924074.1	3-ketoacyl-CoA thiolase [Achromobacter xylosoxidans NBRC 15126 = ATCC 27061]	3-ketoacyl-CoA thiolase	Achromobacter xylosoxidans NBRC 15126 = ATCC 27061	ketoacyl-synt	PF00109.22	Beta-ketoacyl_synthase_N-terminal_domain	253	gi|568127427|ref|YP_008924074.1|	-	390	1.3e-08	22.4	4.8	3	4	0.27	0.41	-2.2	0	238	253	216	231	197	231	0.84
YP_008924074.1	3-ketoacyl-CoA thiolase [Achromobacter xylosoxidans NBRC 15126 = ATCC 27061]	3-ketoacyl-CoA thiolase	Achromobacter xylosoxidans NBRC 15126 = ATCC 27061	ketoacyl-synt	PF00109.22	Beta-ketoacyl_synthase_N-terminal_domain	253	gi|568127427|ref|YP_008924074.1|	-	390	1.3e-08	22.4	4.8	4	4	0.51	0.76	-3.1	0	95	112	266	283	263	314	0.78
YP_008924074.1	3-ketoacyl-CoA thiolase [Achromobacter xylosoxidans NBRC 15126 = ATCC 27061]	3-ketoacyl-CoA thiolase	Achromobacter xylosoxidans NBRC 15126 = ATCC 27061	Ketoacyl-synt_C	PF02801.18	Beta-ketoacyl_synthase_C-terminal_domain	118	gi|568127427|ref|YP_008924074.1|	-	390	4e-07	17.9	1.5	1	2	0.011	0.017	2.9	0	26	48	27	49	16	55	0.83
YP_008924074.1	3-ketoacyl-CoA thiolase [Achromobacter xylosoxidans NBRC 15126 = ATCC 27061]	3-ketoacyl-CoA thiolase	Achromobacter xylosoxidans NBRC 15126 = ATCC 27061	Ketoacyl-synt_C	PF02801.18	Beta-ketoacyl_synthase_C-terminal_domain	118	gi|568127427|ref|YP_008924074.1|	-	390	4e-07	17.9	1.5	2	2	9.7e-05	0.00015	9.6	1	24	68	261	304	256	362	0.71
YP_008925073.1	3-ketoacyl-CoA thiolase / Acetyl-CoA acetyltransferase [Achromobacter xylosoxidans NBRC 15126 = ATCC 27061]	3-ketoacyl-CoA thiolase / Acetyl-CoA acetyltransferase	Achromobacter xylosoxidans NBRC 15126 = ATCC 27061	ketoacyl-synt	PF00109.22	Beta-ketoacyl_synthase_N-terminal_domain	253	gi|568128426|ref|YP_008925073.1|	-	393	1.5e-06	15.7	2.4	1	3	4.9e-07	1.5e-06	15.7	2.4	171	206	86	121	29	128	0.92
YP_008925073.1	3-ketoacyl-CoA thiolase / Acetyl-CoA acetyltransferase [Achromobacter xylosoxidans NBRC 15126 = ATCC 27061]	3-ketoacyl-CoA thiolase / Acetyl-CoA acetyltransferase	Achromobacter xylosoxidans NBRC 15126 = ATCC 27061	ketoacyl-synt	PF00109.22	Beta-ketoacyl_synthase_N-terminal_domain	253	gi|568128426|ref|YP_008925073.1|	-	393	1.5e-06	15.7	2.4	2	3	0.011	0.034	1.4	0.8	29	124	157	249	151	291	0.57
YP_008925073.1	3-ketoacyl-CoA thiolase / Acetyl-CoA acetyltransferase [Achromobacter xylosoxidans NBRC 15126 = ATCC 27061]	3-ketoacyl-CoA thiolase / Acetyl-CoA acetyltransferase	Achromobacter xylosoxidans NBRC 15126 = ATCC 27061	ketoacyl-synt	PF00109.22	Beta-ketoacyl_synthase_N-terminal_domain	253	gi|568128426|ref|YP_008925073.1|	-	393	1.5e-06	15.7	2.4	3	3	0.047	0.14	-0.7	0.1	150	178	354	382	334	389	0.78
YP_008925477.1	3-ketoacyl-CoA thiolase / Acetyl-CoA acetyltransferase [Achromobacter xylosoxidans NBRC 15126 = ATCC 27061]	3-ketoacyl-CoA thiolase / Acetyl-CoA acetyltransferase	Achromobacter xylosoxidans NBRC 15126 = ATCC 27061	ketoacyl-synt	PF00109.22	Beta-ketoacyl_synthase_N-terminal_domain	253	gi|568128830|ref|YP_008925477.1|	-	384	1.4e-09	25.6	3.7	1	3	1e-09	3e-09	24.5	0.6	170	206	84	120	79	127	0.88
YP_008925477.1	3-ketoacyl-CoA thiolase / Acetyl-CoA acetyltransferase [Achromobacter xylosoxidans NBRC 15126 = ATCC 27061]	3-ketoacyl-CoA thiolase / Acetyl-CoA acetyltransferase	Achromobacter xylosoxidans NBRC 15126 = ATCC 27061	ketoacyl-synt	PF00109.22	Beta-ketoacyl_synthase_N-terminal_domain	253	gi|568128830|ref|YP_008925477.1|	-	384	1.4e-09	25.6	3.7	2	3	0.14	0.41	-2.2	0	238	251	241	254	232	256	0.77
YP_008925477.1	3-ketoacyl-CoA thiolase / Acetyl-CoA acetyltransferase [Achromobacter xylosoxidans NBRC 15126 = ATCC 27061]	3-ketoacyl-CoA thiolase / Acetyl-CoA acetyltransferase	Achromobacter xylosoxidans NBRC 15126 = ATCC 27061	ketoacyl-synt	PF00109.22	Beta-ketoacyl_synthase_N-terminal_domain	253	gi|568128830|ref|YP_008925477.1|	-	384	1.4e-09	25.6	3.7	3	3	0.023	0.069	0.4	0	86	110	276	302	264	356	0.81
YP_008925654.1	Acetyl-CoA acetyltransferase / Beta-ketoadipyl CoA thiolase [Achromobacter xylosoxidans NBRC 15126 = ATCC 27061]	Acetyl-CoA acetyltransferase / Beta-ketoadipyl CoA thiolase	Achromobacter xylosoxidans NBRC 15126 = ATCC 27061	ketoacyl-synt	PF00109.22	Beta-ketoacyl_synthase_N-terminal_domain	253	gi|568129007|ref|YP_008925654.1|	-	401	1.4e-09	25.6	0.5	1	1	1e-09	3e-09	24.5	0.5	170	223	86	138	76	144	0.81
YP_008925843.1	Malonyl CoA-acyl carrier protein transacylase [Achromobacter xylosoxidans NBRC 15126 = ATCC 27061]	Malonyl CoA-acyl carrier protein transacylase	Achromobacter xylosoxidans NBRC 15126 = ATCC 27061	ketoacyl-synt	PF00109.22	Beta-ketoacyl_synthase_N-terminal_domain	253	gi|568129196|ref|YP_008925843.1|	-	4043	2.5e-90	290.1	2	1	2	3.5e-90	5.3e-90	289	0.2	2	253	1550	1801	1549	1801	0.96
YP_008925843.1	Malonyl CoA-acyl carrier protein transacylase [Achromobacter xylosoxidans NBRC 15126 = ATCC 27061]	Malonyl CoA-acyl carrier protein transacylase	Achromobacter xylosoxidans NBRC 15126 = ATCC 27061	ketoacyl-synt	PF00109.22	Beta-ketoacyl_synthase_N-terminal_domain	253	gi|568129196|ref|YP_008925843.1|	-	4043	2.5e-90	290.1	2	2	2	0.12	0.18	-1	0.1	85	173	2150	2254	2141	2259	0.66
YP_008925843.1	Malonyl CoA-acyl carrier protein transacylase [Achromobacter xylosoxidans NBRC 15126 = ATCC 27061]	Malonyl CoA-acyl carrier protein transacylase	Achromobacter xylosoxidans NBRC 15126 = ATCC 27061	Ketoacyl-synt_C	PF02801.18	Beta-ketoacyl_synthase_C-terminal_domain	118	gi|568129196|ref|YP_008925843.1|	-	4043	3.7e-46	143.8	0.5	1	3	1.4	2.1	-3.8	0.1	36	58	247	269	243	271	0.83
YP_008925843.1	Malonyl CoA-acyl carrier protein transacylase [Achromobacter xylosoxidans NBRC 15126 = ATCC 27061]	Malonyl CoA-acyl carrier protein transacylase	Achromobacter xylosoxidans NBRC 15126 = ATCC 27061	Ketoacyl-synt_C	PF02801.18	Beta-ketoacyl_synthase_C-terminal_domain	118	gi|568129196|ref|YP_008925843.1|	-	4043	3.7e-46	143.8	0.5	2	3	2.4e-46	3.7e-46	143.8	0.5	1	117	1809	1926	1809	1927	0.98
YP_008925843.1	Malonyl CoA-acyl carrier protein transacylase [Achromobacter xylosoxidans NBRC 15126 = ATCC 27061]	Malonyl CoA-acyl carrier protein transacylase	Achromobacter xylosoxidans NBRC 15126 = ATCC 27061	Ketoacyl-synt_C	PF02801.18	Beta-ketoacyl_synthase_C-terminal_domain	118	gi|568129196|ref|YP_008925843.1|	-	4043	3.7e-46	143.8	0.5	3	3	2	3	-4.6	1.4	92	109	3077	3094	3076	3095	0.9
YP_008925844.1	3-ketoacyl-CoA thiolase [Achromobacter xylosoxidans NBRC 15126 = ATCC 27061]	3-ketoacyl-CoA thiolase	Achromobacter xylosoxidans NBRC 15126 = ATCC 27061	ketoacyl-synt	PF00109.22	Beta-ketoacyl_synthase_N-terminal_domain	253	gi|568129197|ref|YP_008925844.1|	-	393	6.1e-11	30	6.6	1	3	0.00031	0.00046	7.5	0	89	112	26	49	19	59	0.86
YP_008925844.1	3-ketoacyl-CoA thiolase [Achromobacter xylosoxidans NBRC 15126 = ATCC 27061]	3-ketoacyl-CoA thiolase	Achromobacter xylosoxidans NBRC 15126 = ATCC 27061	ketoacyl-synt	PF00109.22	Beta-ketoacyl_synthase_N-terminal_domain	253	gi|568129197|ref|YP_008925844.1|	-	393	6.1e-11	30	6.6	2	3	1.4e-09	2.2e-09	24.9	0.8	171	219	84	133	80	148	0.83
YP_008925844.1	3-ketoacyl-CoA thiolase [Achromobacter xylosoxidans NBRC 15126 = ATCC 27061]	3-ketoacyl-CoA thiolase	Achromobacter xylosoxidans NBRC 15126 = ATCC 27061	ketoacyl-synt	PF00109.22	Beta-ketoacyl_synthase_N-terminal_domain	253	gi|568129197|ref|YP_008925844.1|	-	393	6.1e-11	30	6.6	3	3	0.25	0.38	-2.1	0.2	190	223	322	355	322	381	0.7
YP_008925844.1	3-ketoacyl-CoA thiolase [Achromobacter xylosoxidans NBRC 15126 = ATCC 27061]	3-ketoacyl-CoA thiolase	Achromobacter xylosoxidans NBRC 15126 = ATCC 27061	Ketoacyl-synt_C	PF02801.18	Beta-ketoacyl_synthase_C-terminal_domain	118	gi|568129197|ref|YP_008925844.1|	-	393	3.7e-06	14.8	0	1	2	0.0052	0.0077	4	0	28	47	31	50	9	55	0.86
YP_008925844.1	3-ketoacyl-CoA thiolase [Achromobacter xylosoxidans NBRC 15126 = ATCC 27061]	3-ketoacyl-CoA thiolase	Achromobacter xylosoxidans NBRC 15126 = ATCC 27061	Ketoacyl-synt_C	PF02801.18	Beta-ketoacyl_synthase_C-terminal_domain	118	gi|568129197|ref|YP_008925844.1|	-	393	3.7e-06	14.8	0	2	2	0.00047	0.0007	7.4	0	26	52	265	291	260	296	0.88
YP_008926114.1	3-ketoacyl-CoA thiolase / Acetyl-CoA acetyltransferase [Achromobacter xylosoxidans NBRC 15126 = ATCC 27061]	3-ketoacyl-CoA thiolase / Acetyl-CoA acetyltransferase	Achromobacter xylosoxidans NBRC 15126 = ATCC 27061	ketoacyl-synt	PF00109.22	Beta-ketoacyl_synthase_N-terminal_domain	253	gi|568129467|ref|YP_008926114.1|	-	429	6.8e-10	26.6	0.2	1	2	1.2e-09	3.7e-09	24.2	0.1	169	210	84	125	64	138	0.82
YP_008926114.1	3-ketoacyl-CoA thiolase / Acetyl-CoA acetyltransferase [Achromobacter xylosoxidans NBRC 15126 = ATCC 27061]	3-ketoacyl-CoA thiolase / Acetyl-CoA acetyltransferase	Achromobacter xylosoxidans NBRC 15126 = ATCC 27061	ketoacyl-synt	PF00109.22	Beta-ketoacyl_synthase_N-terminal_domain	253	gi|568129467|ref|YP_008926114.1|	-	429	6.8e-10	26.6	0.2	2	2	0.038	0.11	-0.3	0	67	104	249	286	180	296	0.71
YP_008926118.1	3-ketoacyl-CoA thiolase / Acetyl-CoA acetyltransferase [Achromobacter xylosoxidans NBRC 15126 = ATCC 27061]	3-ketoacyl-CoA thiolase / Acetyl-CoA acetyltransferase	Achromobacter xylosoxidans NBRC 15126 = ATCC 27061	ketoacyl-synt	PF00109.22	Beta-ketoacyl_synthase_N-terminal_domain	253	gi|568129471|ref|YP_008926118.1|	-	399	1.9e-07	18.6	0.9	1	3	6.3e-08	1.9e-07	18.6	0.9	170	206	89	125	86	138	0.86
YP_008926118.1	3-ketoacyl-CoA thiolase / Acetyl-CoA acetyltransferase [Achromobacter xylosoxidans NBRC 15126 = ATCC 27061]	3-ketoacyl-CoA thiolase / Acetyl-CoA acetyltransferase	Achromobacter xylosoxidans NBRC 15126 = ATCC 27061	ketoacyl-synt	PF00109.22	Beta-ketoacyl_synthase_N-terminal_domain	253	gi|568129471|ref|YP_008926118.1|	-	399	1.9e-07	18.6	0.9	2	3	0.11	0.34	-1.9	0	115	156	148	190	134	195	0.48
YP_008926118.1	3-ketoacyl-CoA thiolase / Acetyl-CoA acetyltransferase [Achromobacter xylosoxidans NBRC 15126 = ATCC 27061]	3-ketoacyl-CoA thiolase / Acetyl-CoA acetyltransferase	Achromobacter xylosoxidans NBRC 15126 = ATCC 27061	ketoacyl-synt	PF00109.22	Beta-ketoacyl_synthase_N-terminal_domain	253	gi|568129471|ref|YP_008926118.1|	-	399	1.9e-07	18.6	0.9	3	3	0.33	0.99	-3.4	0	238	247	256	265	247	268	0.8
YP_008926392.1	3-ketoacyl-CoA thiolase / Acetyl-CoA acetyltransferase [Achromobacter xylosoxidans NBRC 15126 = ATCC 27061]	3-ketoacyl-CoA thiolase / Acetyl-CoA acetyltransferase	Achromobacter xylosoxidans NBRC 15126 = ATCC 27061	ketoacyl-synt	PF00109.22	Beta-ketoacyl_synthase_N-terminal_domain	253	gi|568129745|ref|YP_008926392.1|	-	393	2.3e-06	15	6.5	1	4	0.013	0.04	1.1	0	91	122	29	60	24	86	0.81
YP_008926392.1	3-ketoacyl-CoA thiolase / Acetyl-CoA acetyltransferase [Achromobacter xylosoxidans NBRC 15126 = ATCC 27061]	3-ketoacyl-CoA thiolase / Acetyl-CoA acetyltransferase	Achromobacter xylosoxidans NBRC 15126 = ATCC 27061	ketoacyl-synt	PF00109.22	Beta-ketoacyl_synthase_N-terminal_domain	253	gi|568129745|ref|YP_008926392.1|	-	393	2.3e-06	15	6.5	2	4	8.8e-07	2.6e-06	14.8	0.7	167	208	81	122	76	138	0.82
YP_008926392.1	3-ketoacyl-CoA thiolase / Acetyl-CoA acetyltransferase [Achromobacter xylosoxidans NBRC 15126 = ATCC 27061]	3-ketoacyl-CoA thiolase / Acetyl-CoA acetyltransferase	Achromobacter xylosoxidans NBRC 15126 = ATCC 27061	ketoacyl-synt	PF00109.22	Beta-ketoacyl_synthase_N-terminal_domain	253	gi|568129745|ref|YP_008926392.1|	-	393	2.3e-06	15	6.5	3	4	0.13	0.39	-2.1	0.1	236	251	248	263	230	265	0.77
YP_008926392.1	3-ketoacyl-CoA thiolase / Acetyl-CoA acetyltransferase [Achromobacter xylosoxidans NBRC 15126 = ATCC 27061]	3-ketoacyl-CoA thiolase / Acetyl-CoA acetyltransferase	Achromobacter xylosoxidans NBRC 15126 = ATCC 27061	ketoacyl-synt	PF00109.22	Beta-ketoacyl_synthase_N-terminal_domain	253	gi|568129745|ref|YP_008926392.1|	-	393	2.3e-06	15	6.5	4	4	0.069	0.21	-1.2	0	95	111	296	312	294	354	0.78
YP_008926463.1	Aconitate hydratase 2 [Achromobacter xylosoxidans NBRC 15126 = ATCC 27061]	Aconitate hydratase 2	Achromobacter xylosoxidans NBRC 15126 = ATCC 27061	Ketoacyl-synt_C	PF02801.18	Beta-ketoacyl_synthase_C-terminal_domain	118	gi|568129816|ref|YP_008926463.1|	-	863	8.2e-06	13.6	0	1	1	5.8e-06	1.8e-05	12.6	0	57	95	689	725	686	729	0.9
YP_008926532.1	Acetyl-CoA acetyltransferase / Beta-ketoadipyl CoA thiolase [Achromobacter xylosoxidans NBRC 15126 = ATCC 27061]	Acetyl-CoA acetyltransferase / Beta-ketoadipyl CoA thiolase	Achromobacter xylosoxidans NBRC 15126 = ATCC 27061	ketoacyl-synt	PF00109.22	Beta-ketoacyl_synthase_N-terminal_domain	253	gi|568129885|ref|YP_008926532.1|	-	402	4.4e-09	23.9	1.4	1	3	4.4e-09	1.3e-08	22.4	0.1	175	209	92	125	80	144	0.81
YP_008926532.1	Acetyl-CoA acetyltransferase / Beta-ketoadipyl CoA thiolase [Achromobacter xylosoxidans NBRC 15126 = ATCC 27061]	Acetyl-CoA acetyltransferase / Beta-ketoadipyl CoA thiolase	Achromobacter xylosoxidans NBRC 15126 = ATCC 27061	ketoacyl-synt	PF00109.22	Beta-ketoacyl_synthase_N-terminal_domain	253	gi|568129885|ref|YP_008926532.1|	-	402	4.4e-09	23.9	1.4	2	3	0.072	0.22	-1.3	0	191	241	191	247	180	251	0.74
YP_008926532.1	Acetyl-CoA acetyltransferase / Beta-ketoadipyl CoA thiolase [Achromobacter xylosoxidans NBRC 15126 = ATCC 27061]	Acetyl-CoA acetyltransferase / Beta-ketoadipyl CoA thiolase	Achromobacter xylosoxidans NBRC 15126 = ATCC 27061	ketoacyl-synt	PF00109.22	Beta-ketoacyl_synthase_N-terminal_domain	253	gi|568129885|ref|YP_008926532.1|	-	402	4.4e-09	23.9	1.4	3	3	0.11	0.32	-1.8	0	84	108	256	280	220	292	0.68
YP_008027632.1	3-oxoacyl-[acyl-carrier-protein] synthase,KASII [Achromobacter xylosoxidans NH44784-1996]	3-oxoacyl-acyl-carrier-protein synthase,KASII	Achromobacter xylosoxidans NH44784-1996	ketoacyl-synt	PF00109.22	Beta-ketoacyl_synthase_N-terminal_domain	253	gi|528982315|ref|YP_008027632.1|	-	409	1.5e-68	218.7	0.2	1	1	1.7e-68	2.5e-68	218.1	0.2	2	253	3	246	2	246	0.94
YP_008027632.1	3-oxoacyl-[acyl-carrier-protein] synthase,KASII [Achromobacter xylosoxidans NH44784-1996]	3-oxoacyl-acyl-carrier-protein synthase,KASII	Achromobacter xylosoxidans NH44784-1996	Ketoacyl-synt_C	PF02801.18	Beta-ketoacyl_synthase_C-terminal_domain	118	gi|528982315|ref|YP_008027632.1|	-	409	3.7e-36	111.5	0	1	1	5.4e-36	8e-36	110.4	0	1	117	254	366	254	367	0.95
YP_008027636.1	3-oxoacyl-[acyl-carrier-protein] synthase,KASIII [Achromobacter xylosoxidans NH44784-1996]	3-oxoacyl-acyl-carrier-protein synthase,KASIII	Achromobacter xylosoxidans NH44784-1996	ketoacyl-synt	PF00109.22	Beta-ketoacyl_synthase_N-terminal_domain	253	gi|528982319|ref|YP_008027636.1|	-	328	3.1e-06	14.6	10.5	1	3	0.00028	0.00084	6.6	0.1	83	111	56	84	45	94	0.83
YP_008027636.1	3-oxoacyl-[acyl-carrier-protein] synthase,KASIII [Achromobacter xylosoxidans NH44784-1996]	3-oxoacyl-acyl-carrier-protein synthase,KASIII	Achromobacter xylosoxidans NH44784-1996	ketoacyl-synt	PF00109.22	Beta-ketoacyl_synthase_N-terminal_domain	253	gi|528982319|ref|YP_008027636.1|	-	328	3.1e-06	14.6	10.5	2	3	3.6e-05	0.00011	9.6	1.8	155	204	101	151	87	163	0.86
YP_008027636.1	3-oxoacyl-[acyl-carrier-protein] synthase,KASIII [Achromobacter xylosoxidans NH44784-1996]	3-oxoacyl-acyl-carrier-protein synthase,KASIII	Achromobacter xylosoxidans NH44784-1996	ketoacyl-synt	PF00109.22	Beta-ketoacyl_synthase_N-terminal_domain	253	gi|528982319|ref|YP_008027636.1|	-	328	3.1e-06	14.6	10.5	3	3	0.0036	0.011	3	0.1	236	250	165	179	153	181	0.83
YP_008029174.1	Acetyl-CoA C-acyltransferase [Achromobacter xylosoxidans NH44784-1996]	Acetyl-CoA C-acyltransferase	Achromobacter xylosoxidans NH44784-1996	ketoacyl-synt	PF00109.22	Beta-ketoacyl_synthase_N-terminal_domain	253	gi|528983857|ref|YP_008029174.1|	-	393	4.4e-06	14.1	4.3	1	3	0.0029	0.0087	3.3	0	90	126	29	65	26	76	0.8
YP_008029174.1	Acetyl-CoA C-acyltransferase [Achromobacter xylosoxidans NH44784-1996]	Acetyl-CoA C-acyltransferase	Achromobacter xylosoxidans NH44784-1996	ketoacyl-synt	PF00109.22	Beta-ketoacyl_synthase_N-terminal_domain	253	gi|528983857|ref|YP_008029174.1|	-	393	4.4e-06	14.1	4.3	2	3	5.6e-05	0.00017	8.9	0.6	171	209	85	123	78	150	0.81
YP_008029174.1	Acetyl-CoA C-acyltransferase [Achromobacter xylosoxidans NH44784-1996]	Acetyl-CoA C-acyltransferase	Achromobacter xylosoxidans NH44784-1996	ketoacyl-synt	PF00109.22	Beta-ketoacyl_synthase_N-terminal_domain	253	gi|528983857|ref|YP_008029174.1|	-	393	4.4e-06	14.1	4.3	3	3	0.016	0.048	0.9	0	234	253	246	265	233	265	0.76
YP_008029184.1	thiolase [Achromobacter xylosoxidans NH44784-1996]	thiolase	Achromobacter xylosoxidans NH44784-1996	Ketoacyl-synt_C	PF02801.18	Beta-ketoacyl_synthase_C-terminal_domain	118	gi|528983867|ref|YP_008029184.1|	-	382	3.3e-07	18.1	6.1	1	4	0.0022	0.0065	4.3	0	2	47	7	50	6	58	0.8
YP_008029184.1	thiolase [Achromobacter xylosoxidans NH44784-1996]	thiolase	Achromobacter xylosoxidans NH44784-1996	Ketoacyl-synt_C	PF02801.18	Beta-ketoacyl_synthase_C-terminal_domain	118	gi|528983867|ref|YP_008029184.1|	-	382	3.3e-07	18.1	6.1	2	4	0.00098	0.0029	5.4	0	49	73	156	180	153	192	0.83
YP_008029184.1	thiolase [Achromobacter xylosoxidans NH44784-1996]	thiolase	Achromobacter xylosoxidans NH44784-1996	Ketoacyl-synt_C	PF02801.18	Beta-ketoacyl_synthase_C-terminal_domain	118	gi|528983867|ref|YP_008029184.1|	-	382	3.3e-07	18.1	6.1	3	4	9.4e-05	0.00028	8.7	0	23	47	250	274	228	280	0.74
YP_008029184.1	thiolase [Achromobacter xylosoxidans NH44784-1996]	thiolase	Achromobacter xylosoxidans NH44784-1996	Ketoacyl-synt_C	PF02801.18	Beta-ketoacyl_synthase_C-terminal_domain	118	gi|528983867|ref|YP_008029184.1|	-	382	3.3e-07	18.1	6.1	4	4	0.099	0.3	-1.1	0.6	87	106	325	344	324	351	0.84
YP_008030727.1	Aconitate hydratase 2 [Achromobacter xylosoxidans NH44784-1996]	Aconitate hydratase 2	Achromobacter xylosoxidans NH44784-1996	Ketoacyl-synt_C	PF02801.18	Beta-ketoacyl_synthase_C-terminal_domain	118	gi|528985410|ref|YP_008030727.1|	-	863	8.2e-06	13.6	0	1	1	5.8e-06	1.8e-05	12.6	0	57	95	689	725	686	729	0.9
YP_008031025.1	FIG138576: 3-oxoacyl-[ACP] synthase [Achromobacter xylosoxidans NH44784-1996]	FIG138576: 3-oxoacyl-ACP synthase	Achromobacter xylosoxidans NH44784-1996	ketoacyl-synt	PF00109.22	Beta-ketoacyl_synthase_N-terminal_domain	253	gi|528985708|ref|YP_008031025.1|	-	407	1.2e-49	156.9	0.9	1	2	6e-49	9e-49	154	0.4	2	253	2	246	1	246	0.86
YP_008031025.1	FIG138576: 3-oxoacyl-[ACP] synthase [Achromobacter xylosoxidans NH44784-1996]	FIG138576: 3-oxoacyl-ACP synthase	Achromobacter xylosoxidans NH44784-1996	ketoacyl-synt	PF00109.22	Beta-ketoacyl_synthase_N-terminal_domain	253	gi|528985708|ref|YP_008031025.1|	-	407	1.2e-49	156.9	0.9	2	2	0.024	0.035	1.3	0	87	124	272	304	259	339	0.7
YP_008031025.1	FIG138576: 3-oxoacyl-[ACP] synthase [Achromobacter xylosoxidans NH44784-1996]	FIG138576: 3-oxoacyl-ACP synthase	Achromobacter xylosoxidans NH44784-1996	Ketoacyl-synt_C	PF02801.18	Beta-ketoacyl_synthase_C-terminal_domain	118	gi|528985708|ref|YP_008031025.1|	-	407	1.1e-32	100.3	0	1	2	0.16	0.25	-0.8	0	51	93	104	145	73	150	0.73
YP_008031025.1	FIG138576: 3-oxoacyl-[ACP] synthase [Achromobacter xylosoxidans NH44784-1996]	FIG138576: 3-oxoacyl-ACP synthase	Achromobacter xylosoxidans NH44784-1996	Ketoacyl-synt_C	PF02801.18	Beta-ketoacyl_synthase_C-terminal_domain	118	gi|528985708|ref|YP_008031025.1|	-	407	1.1e-32	100.3	0	2	2	3.2e-32	4.9e-32	98.2	0	1	117	254	363	254	364	0.96
YP_008031028.1	3-oxoacyl-[ACP] synthase [Achromobacter xylosoxidans NH44784-1996]	3-oxoacyl-ACP synthase	Achromobacter xylosoxidans NH44784-1996	ketoacyl-synt	PF00109.22	Beta-ketoacyl_synthase_N-terminal_domain	253	gi|528985711|ref|YP_008031028.1|	-	400	1.9e-23	71	1.8	1	2	1.3e-23	1.9e-23	71	1.8	111	251	93	233	61	235	0.77
YP_008031028.1	3-oxoacyl-[ACP] synthase [Achromobacter xylosoxidans NH44784-1996]	3-oxoacyl-ACP synthase	Achromobacter xylosoxidans NH44784-1996	ketoacyl-synt	PF00109.22	Beta-ketoacyl_synthase_N-terminal_domain	253	gi|528985711|ref|YP_008031028.1|	-	400	1.9e-23	71	1.8	2	2	0.53	0.8	-3.1	0.1	92	110	263	281	262	302	0.73
YP_008031028.1	3-oxoacyl-[ACP] synthase [Achromobacter xylosoxidans NH44784-1996]	3-oxoacyl-ACP synthase	Achromobacter xylosoxidans NH44784-1996	Ketoacyl-synt_C	PF02801.18	Beta-ketoacyl_synthase_C-terminal_domain	118	gi|528985711|ref|YP_008031028.1|	-	400	1.5e-26	80.5	0.3	1	1	2.2e-26	3.2e-26	79.5	0.3	5	106	242	338	239	351	0.9
YP_008031189.1	3-ketoacyl-CoA thiolase [Achromobacter xylosoxidans NH44784-1996]	3-ketoacyl-CoA thiolase	Achromobacter xylosoxidans NH44784-1996	ketoacyl-synt	PF00109.22	Beta-ketoacyl_synthase_N-terminal_domain	253	gi|528985872|ref|YP_008031189.1|	-	390	1.3e-08	22.4	4.8	1	4	0.0022	0.0034	4.7	0.1	91	124	26	55	20	77	0.72
YP_008031189.1	3-ketoacyl-CoA thiolase [Achromobacter xylosoxidans NH44784-1996]	3-ketoacyl-CoA thiolase	Achromobacter xylosoxidans NH44784-1996	ketoacyl-synt	PF00109.22	Beta-ketoacyl_synthase_N-terminal_domain	253	gi|528985872|ref|YP_008031189.1|	-	390	1.3e-08	22.4	4.8	2	4	1.9e-07	2.8e-07	18	0.7	167	207	78	118	75	127	0.89
YP_008031189.1	3-ketoacyl-CoA thiolase [Achromobacter xylosoxidans NH44784-1996]	3-ketoacyl-CoA thiolase	Achromobacter xylosoxidans NH44784-1996	ketoacyl-synt	PF00109.22	Beta-ketoacyl_synthase_N-terminal_domain	253	gi|528985872|ref|YP_008031189.1|	-	390	1.3e-08	22.4	4.8	3	4	0.27	0.41	-2.2	0	238	253	216	231	197	231	0.84
YP_008031189.1	3-ketoacyl-CoA thiolase [Achromobacter xylosoxidans NH44784-1996]	3-ketoacyl-CoA thiolase	Achromobacter xylosoxidans NH44784-1996	ketoacyl-synt	PF00109.22	Beta-ketoacyl_synthase_N-terminal_domain	253	gi|528985872|ref|YP_008031189.1|	-	390	1.3e-08	22.4	4.8	4	4	0.51	0.76	-3.1	0	95	112	266	283	263	314	0.78
YP_008031189.1	3-ketoacyl-CoA thiolase [Achromobacter xylosoxidans NH44784-1996]	3-ketoacyl-CoA thiolase	Achromobacter xylosoxidans NH44784-1996	Ketoacyl-synt_C	PF02801.18	Beta-ketoacyl_synthase_C-terminal_domain	118	gi|528985872|ref|YP_008031189.1|	-	390	4e-07	17.9	1.5	1	2	0.011	0.017	2.9	0	26	48	27	49	16	55	0.83
YP_008031189.1	3-ketoacyl-CoA thiolase [Achromobacter xylosoxidans NH44784-1996]	3-ketoacyl-CoA thiolase	Achromobacter xylosoxidans NH44784-1996	Ketoacyl-synt_C	PF02801.18	Beta-ketoacyl_synthase_C-terminal_domain	118	gi|528985872|ref|YP_008031189.1|	-	390	4e-07	17.9	1.5	2	2	9.7e-05	0.00015	9.6	1	24	68	261	304	256	362	0.71
YP_008032239.1	3-ketoacyl-CoA thiolase [Achromobacter xylosoxidans NH44784-1996]	3-ketoacyl-CoA thiolase	Achromobacter xylosoxidans NH44784-1996	ketoacyl-synt	PF00109.22	Beta-ketoacyl_synthase_N-terminal_domain	253	gi|528986922|ref|YP_008032239.1|	-	393	4.5e-07	17.3	0.9	1	4	0.089	0.27	-1.6	0	91	113	30	52	29	71	0.76
YP_008032239.1	3-ketoacyl-CoA thiolase [Achromobacter xylosoxidans NH44784-1996]	3-ketoacyl-CoA thiolase	Achromobacter xylosoxidans NH44784-1996	ketoacyl-synt	PF00109.22	Beta-ketoacyl_synthase_N-terminal_domain	253	gi|528986922|ref|YP_008032239.1|	-	393	4.5e-07	17.3	0.9	2	4	1.5e-07	4.5e-07	17.3	0.9	174	206	89	121	80	128	0.89
YP_008032239.1	3-ketoacyl-CoA thiolase [Achromobacter xylosoxidans NH44784-1996]	3-ketoacyl-CoA thiolase	Achromobacter xylosoxidans NH44784-1996	ketoacyl-synt	PF00109.22	Beta-ketoacyl_synthase_N-terminal_domain	253	gi|528986922|ref|YP_008032239.1|	-	393	4.5e-07	17.3	0.9	3	4	0.015	0.046	0.9	0.6	110	194	235	265	152	284	0.54
YP_008032239.1	3-ketoacyl-CoA thiolase [Achromobacter xylosoxidans NH44784-1996]	3-ketoacyl-CoA thiolase	Achromobacter xylosoxidans NH44784-1996	ketoacyl-synt	PF00109.22	Beta-ketoacyl_synthase_N-terminal_domain	253	gi|528986922|ref|YP_008032239.1|	-	393	4.5e-07	17.3	0.9	4	4	0.047	0.14	-0.7	0.1	150	178	354	382	334	389	0.78
YP_008032527.1	3-ketoacyl-CoA thiolase [Achromobacter xylosoxidans NH44784-1996]	3-ketoacyl-CoA thiolase	Achromobacter xylosoxidans NH44784-1996	ketoacyl-synt	PF00109.22	Beta-ketoacyl_synthase_N-terminal_domain	253	gi|528987210|ref|YP_008032527.1|	-	384	1.3e-09	25.6	3.7	1	3	1e-09	3e-09	24.5	0.6	170	206	84	120	79	127	0.88
YP_008032527.1	3-ketoacyl-CoA thiolase [Achromobacter xylosoxidans NH44784-1996]	3-ketoacyl-CoA thiolase	Achromobacter xylosoxidans NH44784-1996	ketoacyl-synt	PF00109.22	Beta-ketoacyl_synthase_N-terminal_domain	253	gi|528987210|ref|YP_008032527.1|	-	384	1.3e-09	25.6	3.7	2	3	0.14	0.41	-2.2	0	238	251	241	254	232	256	0.77
YP_008032527.1	3-ketoacyl-CoA thiolase [Achromobacter xylosoxidans NH44784-1996]	3-ketoacyl-CoA thiolase	Achromobacter xylosoxidans NH44784-1996	ketoacyl-synt	PF00109.22	Beta-ketoacyl_synthase_N-terminal_domain	253	gi|528987210|ref|YP_008032527.1|	-	384	1.3e-09	25.6	3.7	3	3	0.022	0.067	0.4	0	86	110	276	302	264	357	0.8
YP_008032700.1	Acetyl-CoA acetyltransferase [Achromobacter xylosoxidans NH44784-1996]	Acetyl-CoA acetyltransferase	Achromobacter xylosoxidans NH44784-1996	ketoacyl-synt	PF00109.22	Beta-ketoacyl_synthase_N-terminal_domain	253	gi|528987383|ref|YP_008032700.1|	-	401	1.4e-09	25.6	0.5	1	1	1e-09	3e-09	24.5	0.5	170	223	86	138	76	144	0.81
YP_008032877.1	Malonyl CoA-acyl carrier protein transacylase [Achromobacter xylosoxidans NH44784-1996]	Malonyl CoA-acyl carrier protein transacylase	Achromobacter xylosoxidans NH44784-1996	ketoacyl-synt	PF00109.22	Beta-ketoacyl_synthase_N-terminal_domain	253	gi|528987560|ref|YP_008032877.1|	-	4043	3.3e-90	289.7	1.8	1	2	3.7e-90	5.6e-90	289	0.2	2	253	1550	1801	1549	1801	0.96
YP_008032877.1	Malonyl CoA-acyl carrier protein transacylase [Achromobacter xylosoxidans NH44784-1996]	Malonyl CoA-acyl carrier protein transacylase	Achromobacter xylosoxidans NH44784-1996	ketoacyl-synt	PF00109.22	Beta-ketoacyl_synthase_N-terminal_domain	253	gi|528987560|ref|YP_008032877.1|	-	4043	3.3e-90	289.7	1.8	2	2	0.23	0.35	-1.9	0.1	86	159	2151	2241	2143	2256	0.56
YP_008032877.1	Malonyl CoA-acyl carrier protein transacylase [Achromobacter xylosoxidans NH44784-1996]	Malonyl CoA-acyl carrier protein transacylase	Achromobacter xylosoxidans NH44784-1996	Ketoacyl-synt_C	PF02801.18	Beta-ketoacyl_synthase_C-terminal_domain	118	gi|528987560|ref|YP_008032877.1|	-	4043	4.2e-46	143.6	0.5	1	3	1.6	2.4	-4	0.1	36	58	247	269	244	271	0.86
YP_008032877.1	Malonyl CoA-acyl carrier protein transacylase [Achromobacter xylosoxidans NH44784-1996]	Malonyl CoA-acyl carrier protein transacylase	Achromobacter xylosoxidans NH44784-1996	Ketoacyl-synt_C	PF02801.18	Beta-ketoacyl_synthase_C-terminal_domain	118	gi|528987560|ref|YP_008032877.1|	-	4043	4.2e-46	143.6	0.5	2	3	2.8e-46	4.2e-46	143.6	0.5	1	117	1809	1926	1809	1927	0.98
YP_008032877.1	Malonyl CoA-acyl carrier protein transacylase [Achromobacter xylosoxidans NH44784-1996]	Malonyl CoA-acyl carrier protein transacylase	Achromobacter xylosoxidans NH44784-1996	Ketoacyl-synt_C	PF02801.18	Beta-ketoacyl_synthase_C-terminal_domain	118	gi|528987560|ref|YP_008032877.1|	-	4043	4.2e-46	143.6	0.5	3	3	2	3	-4.6	1.4	92	109	3077	3094	3076	3095	0.9
YP_008032878.1	3-ketoacyl-CoA thiolase [Achromobacter xylosoxidans NH44784-1996]	3-ketoacyl-CoA thiolase	Achromobacter xylosoxidans NH44784-1996	ketoacyl-synt	PF00109.22	Beta-ketoacyl_synthase_N-terminal_domain	253	gi|528987561|ref|YP_008032878.1|	-	393	6.1e-11	30	6.6	1	3	0.00031	0.00046	7.5	0	89	112	26	49	19	59	0.86
YP_008032878.1	3-ketoacyl-CoA thiolase [Achromobacter xylosoxidans NH44784-1996]	3-ketoacyl-CoA thiolase	Achromobacter xylosoxidans NH44784-1996	ketoacyl-synt	PF00109.22	Beta-ketoacyl_synthase_N-terminal_domain	253	gi|528987561|ref|YP_008032878.1|	-	393	6.1e-11	30	6.6	2	3	1.4e-09	2.2e-09	24.9	0.8	171	219	84	133	80	148	0.83
YP_008032878.1	3-ketoacyl-CoA thiolase [Achromobacter xylosoxidans NH44784-1996]	3-ketoacyl-CoA thiolase	Achromobacter xylosoxidans NH44784-1996	ketoacyl-synt	PF00109.22	Beta-ketoacyl_synthase_N-terminal_domain	253	gi|528987561|ref|YP_008032878.1|	-	393	6.1e-11	30	6.6	3	3	0.25	0.38	-2.1	0.2	190	223	322	355	322	381	0.7
YP_008032878.1	3-ketoacyl-CoA thiolase [Achromobacter xylosoxidans NH44784-1996]	3-ketoacyl-CoA thiolase	Achromobacter xylosoxidans NH44784-1996	Ketoacyl-synt_C	PF02801.18	Beta-ketoacyl_synthase_C-terminal_domain	118	gi|528987561|ref|YP_008032878.1|	-	393	3.7e-06	14.8	0	1	2	0.0052	0.0077	4	0	28	47	31	50	9	55	0.86
YP_008032878.1	3-ketoacyl-CoA thiolase [Achromobacter xylosoxidans NH44784-1996]	3-ketoacyl-CoA thiolase	Achromobacter xylosoxidans NH44784-1996	Ketoacyl-synt_C	PF02801.18	Beta-ketoacyl_synthase_C-terminal_domain	118	gi|528987561|ref|YP_008032878.1|	-	393	3.7e-06	14.8	0	2	2	0.00047	0.0007	7.4	0	26	52	265	291	260	296	0.88
YP_008033172.1	3-ketoacyl-CoA thiolase [Achromobacter xylosoxidans NH44784-1996]	3-ketoacyl-CoA thiolase	Achromobacter xylosoxidans NH44784-1996	ketoacyl-synt	PF00109.22	Beta-ketoacyl_synthase_N-terminal_domain	253	gi|528987855|ref|YP_008033172.1|	-	429	6.8e-10	26.6	0.2	1	2	1.2e-09	3.7e-09	24.2	0.1	169	210	84	125	64	138	0.82
YP_008033172.1	3-ketoacyl-CoA thiolase [Achromobacter xylosoxidans NH44784-1996]	3-ketoacyl-CoA thiolase	Achromobacter xylosoxidans NH44784-1996	ketoacyl-synt	PF00109.22	Beta-ketoacyl_synthase_N-terminal_domain	253	gi|528987855|ref|YP_008033172.1|	-	429	6.8e-10	26.6	0.2	2	2	0.038	0.11	-0.3	0	67	104	249	286	180	296	0.71
YP_008033176.1	3-ketoacyl-CoA thiolase [Achromobacter xylosoxidans NH44784-1996]	3-ketoacyl-CoA thiolase	Achromobacter xylosoxidans NH44784-1996	ketoacyl-synt	PF00109.22	Beta-ketoacyl_synthase_N-terminal_domain	253	gi|528987859|ref|YP_008033176.1|	-	399	2e-07	18.5	0.9	1	3	6.7e-08	2e-07	18.5	0.9	170	206	89	125	85	136	0.86
YP_008033176.1	3-ketoacyl-CoA thiolase [Achromobacter xylosoxidans NH44784-1996]	3-ketoacyl-CoA thiolase	Achromobacter xylosoxidans NH44784-1996	ketoacyl-synt	PF00109.22	Beta-ketoacyl_synthase_N-terminal_domain	253	gi|528987859|ref|YP_008033176.1|	-	399	2e-07	18.5	0.9	2	3	0.13	0.39	-2.1	0	115	156	148	190	135	195	0.47
YP_008033176.1	3-ketoacyl-CoA thiolase [Achromobacter xylosoxidans NH44784-1996]	3-ketoacyl-CoA thiolase	Achromobacter xylosoxidans NH44784-1996	ketoacyl-synt	PF00109.22	Beta-ketoacyl_synthase_N-terminal_domain	253	gi|528987859|ref|YP_008033176.1|	-	399	2e-07	18.5	0.9	3	3	0.33	0.99	-3.4	0	238	247	256	265	247	268	0.8
YP_008033451.1	3-ketoacyl-CoA thiolase [Achromobacter xylosoxidans NH44784-1996]	3-ketoacyl-CoA thiolase	Achromobacter xylosoxidans NH44784-1996	ketoacyl-synt	PF00109.22	Beta-ketoacyl_synthase_N-terminal_domain	253	gi|528988134|ref|YP_008033451.1|	-	393	2.6e-06	14.9	6.8	1	4	0.011	0.032	1.4	0	91	124	29	62	23	86	0.79
YP_008033451.1	3-ketoacyl-CoA thiolase [Achromobacter xylosoxidans NH44784-1996]	3-ketoacyl-CoA thiolase	Achromobacter xylosoxidans NH44784-1996	ketoacyl-synt	PF00109.22	Beta-ketoacyl_synthase_N-terminal_domain	253	gi|528988134|ref|YP_008033451.1|	-	393	2.6e-06	14.9	6.8	2	4	8.9e-07	2.7e-06	14.8	0.7	167	208	81	122	78	138	0.81
YP_008033451.1	3-ketoacyl-CoA thiolase [Achromobacter xylosoxidans NH44784-1996]	3-ketoacyl-CoA thiolase	Achromobacter xylosoxidans NH44784-1996	ketoacyl-synt	PF00109.22	Beta-ketoacyl_synthase_N-terminal_domain	253	gi|528988134|ref|YP_008033451.1|	-	393	2.6e-06	14.9	6.8	3	4	0.13	0.39	-2.1	0.1	236	251	248	263	230	265	0.77
YP_008033451.1	3-ketoacyl-CoA thiolase [Achromobacter xylosoxidans NH44784-1996]	3-ketoacyl-CoA thiolase	Achromobacter xylosoxidans NH44784-1996	ketoacyl-synt	PF00109.22	Beta-ketoacyl_synthase_N-terminal_domain	253	gi|528988134|ref|YP_008033451.1|	-	393	2.6e-06	14.9	6.8	4	4	0.069	0.21	-1.2	0	95	111	296	312	294	354	0.78
YP_003398096.1	acetyl-CoA acetyltransferase [Acidaminococcus fermentans DSM 20731]	acetyl-CoA acetyltransferase	Acidaminococcus fermentans DSM 20731	ketoacyl-synt	PF00109.22	Beta-ketoacyl_synthase_N-terminal_domain	253	gi|284047757|ref|YP_003398096.1|	-	402	2e-10	28.3	1.4	1	3	4.1e-10	1.2e-09	25.8	0.6	167	205	79	117	75	126	0.92
YP_003398096.1	acetyl-CoA acetyltransferase [Acidaminococcus fermentans DSM 20731]	acetyl-CoA acetyltransferase	Acidaminococcus fermentans DSM 20731	ketoacyl-synt	PF00109.22	Beta-ketoacyl_synthase_N-terminal_domain	253	gi|284047757|ref|YP_003398096.1|	-	402	2e-10	28.3	1.4	2	3	0.039	0.12	-0.4	0	41	107	132	192	123	199	0.76
YP_003398096.1	acetyl-CoA acetyltransferase [Acidaminococcus fermentans DSM 20731]	acetyl-CoA acetyltransferase	Acidaminococcus fermentans DSM 20731	ketoacyl-synt	PF00109.22	Beta-ketoacyl_synthase_N-terminal_domain	253	gi|284047757|ref|YP_003398096.1|	-	402	2e-10	28.3	1.4	3	3	0.21	0.62	-2.8	0	92	124	302	338	297	356	0.74
YP_003399064.1	3-oxoacyl-(acyl-carrier-protein) synthase 2 [Acidaminococcus fermentans DSM 20731]	3-oxoacyl-(acyl-carrier-protein) synthase 2	Acidaminococcus fermentans DSM 20731	ketoacyl-synt	PF00109.22	Beta-ketoacyl_synthase_N-terminal_domain	253	gi|284048725|ref|YP_003399064.1|	-	415	1.7e-65	208.7	0.4	1	2	1.3e-64	1.9e-64	205.3	0.5	2	253	3	246	2	246	0.93
YP_003399064.1	3-oxoacyl-(acyl-carrier-protein) synthase 2 [Acidaminococcus fermentans DSM 20731]	3-oxoacyl-(acyl-carrier-protein) synthase 2	Acidaminococcus fermentans DSM 20731	ketoacyl-synt	PF00109.22	Beta-ketoacyl_synthase_N-terminal_domain	253	gi|284048725|ref|YP_003399064.1|	-	415	1.7e-65	208.7	0.4	2	2	0.025	0.037	1.2	0	86	112	273	299	264	338	0.82
YP_003399064.1	3-oxoacyl-(acyl-carrier-protein) synthase 2 [Acidaminococcus fermentans DSM 20731]	3-oxoacyl-(acyl-carrier-protein) synthase 2	Acidaminococcus fermentans DSM 20731	Ketoacyl-synt_C	PF02801.18	Beta-ketoacyl_synthase_C-terminal_domain	118	gi|284048725|ref|YP_003399064.1|	-	415	4.8e-43	133.7	0.1	1	1	5.8e-43	8.6e-43	132.9	0.1	1	117	254	368	254	369	0.98
YP_003399069.1	3-oxoacyl-(acyl-carrier-protein) synthase III [Acidaminococcus fermentans DSM 20731]	3-oxoacyl-(acyl-carrier-protein) synthase III	Acidaminococcus fermentans DSM 20731	Ketoacyl-synt_C	PF02801.18	Beta-ketoacyl_synthase_C-terminal_domain	118	gi|284048730|ref|YP_003399069.1|	-	336	4.6e-06	14.4	0.1	1	2	0.00011	0.00033	8.5	0	14	47	43	79	34	86	0.73
YP_003399069.1	3-oxoacyl-(acyl-carrier-protein) synthase III [Acidaminococcus fermentans DSM 20731]	3-oxoacyl-(acyl-carrier-protein) synthase III	Acidaminococcus fermentans DSM 20731	Ketoacyl-synt_C	PF02801.18	Beta-ketoacyl_synthase_C-terminal_domain	118	gi|284048730|ref|YP_003399069.1|	-	336	4.6e-06	14.4	0.1	2	2	0.0041	0.012	3.4	0	28	51	233	256	220	269	0.82
YP_003399152.1	acetyl-CoA acetyltransferase [Acidaminococcus fermentans DSM 20731]	acetyl-CoA acetyltransferase	Acidaminococcus fermentans DSM 20731	ketoacyl-synt	PF00109.22	Beta-ketoacyl_synthase_N-terminal_domain	253	gi|284048813|ref|YP_003399152.1|	-	393	1.4e-09	25.5	6.9	1	4	0.0058	0.0087	3.3	0	90	126	28	64	25	79	0.8
YP_003399152.1	acetyl-CoA acetyltransferase [Acidaminococcus fermentans DSM 20731]	acetyl-CoA acetyltransferase	Acidaminococcus fermentans DSM 20731	ketoacyl-synt	PF00109.22	Beta-ketoacyl_synthase_N-terminal_domain	253	gi|284048813|ref|YP_003399152.1|	-	393	1.4e-09	25.5	6.9	2	4	1.4e-09	2e-09	25	0.5	167	207	80	120	68	143	0.87
YP_003399152.1	acetyl-CoA acetyltransferase [Acidaminococcus fermentans DSM 20731]	acetyl-CoA acetyltransferase	Acidaminococcus fermentans DSM 20731	ketoacyl-synt	PF00109.22	Beta-ketoacyl_synthase_N-terminal_domain	253	gi|284048813|ref|YP_003399152.1|	-	393	1.4e-09	25.5	6.9	3	4	0.24	0.36	-2	0.1	236	253	248	265	235	265	0.77
YP_003399152.1	acetyl-CoA acetyltransferase [Acidaminococcus fermentans DSM 20731]	acetyl-CoA acetyltransferase	Acidaminococcus fermentans DSM 20731	ketoacyl-synt	PF00109.22	Beta-ketoacyl_synthase_N-terminal_domain	253	gi|284048813|ref|YP_003399152.1|	-	393	1.4e-09	25.5	6.9	4	4	0.65	0.98	-3.4	0	96	112	297	313	295	339	0.73
YP_003399152.1	acetyl-CoA acetyltransferase [Acidaminococcus fermentans DSM 20731]	acetyl-CoA acetyltransferase	Acidaminococcus fermentans DSM 20731	Ketoacyl-synt_C	PF02801.18	Beta-ketoacyl_synthase_C-terminal_domain	118	gi|284048813|ref|YP_003399152.1|	-	393	4e-07	17.9	2	1	4	0.0021	0.0032	5.3	0	21	47	27	51	4	54	0.73
YP_003399152.1	acetyl-CoA acetyltransferase [Acidaminococcus fermentans DSM 20731]	acetyl-CoA acetyltransferase	Acidaminococcus fermentans DSM 20731	Ketoacyl-synt_C	PF02801.18	Beta-ketoacyl_synthase_C-terminal_domain	118	gi|284048813|ref|YP_003399152.1|	-	393	4e-07	17.9	2	2	4	0.62	0.93	-2.7	0	17	29	159	171	153	195	0.51
YP_003399152.1	acetyl-CoA acetyltransferase [Acidaminococcus fermentans DSM 20731]	acetyl-CoA acetyltransferase	Acidaminococcus fermentans DSM 20731	Ketoacyl-synt_C	PF02801.18	Beta-ketoacyl_synthase_C-terminal_domain	118	gi|284048813|ref|YP_003399152.1|	-	393	4e-07	17.9	2	3	4	0.0026	0.0038	5	0	29	50	296	317	274	323	0.88
YP_003399152.1	acetyl-CoA acetyltransferase [Acidaminococcus fermentans DSM 20731]	acetyl-CoA acetyltransferase	Acidaminococcus fermentans DSM 20731	Ketoacyl-synt_C	PF02801.18	Beta-ketoacyl_synthase_C-terminal_domain	118	gi|284048813|ref|YP_003399152.1|	-	393	4e-07	17.9	2	4	4	0.0043	0.0064	4.3	0.1	87	109	347	369	343	371	0.94
YP_004895822.1	hypothetical protein Acin_0440 [Acidaminococcus intestini RyC-MR95]	hypothetical protein Acin_0440	Acidaminococcus intestini RyC-MR95	ketoacyl-synt	PF00109.22	Beta-ketoacyl_synthase_N-terminal_domain	253	gi|352683838|ref|YP_004895822.1|	-	395	3.5e-09	24.2	0.3	1	1	2.3e-09	7e-09	23.3	0.3	167	204	78	115	67	125	0.9
YP_004896094.1	acetyl-CoA acetyltransferase [Acidaminococcus intestini RyC-MR95]	acetyl-CoA acetyltransferase	Acidaminococcus intestini RyC-MR95	ketoacyl-synt	PF00109.22	Beta-ketoacyl_synthase_N-terminal_domain	253	gi|352684110|ref|YP_004896094.1|	-	393	1.1e-10	29.2	0.6	1	2	0.022	0.066	0.4	0	93	128	31	66	27	77	0.79
YP_004896094.1	acetyl-CoA acetyltransferase [Acidaminococcus intestini RyC-MR95]	acetyl-CoA acetyltransferase	Acidaminococcus intestini RyC-MR95	ketoacyl-synt	PF00109.22	Beta-ketoacyl_synthase_N-terminal_domain	253	gi|352684110|ref|YP_004896094.1|	-	393	1.1e-10	29.2	0.6	2	2	3.3e-10	1e-09	26	0.4	165	209	78	121	65	150	0.82
YP_004896974.1	beta-ketoacyl synthase [Acidaminococcus intestini RyC-MR95]	beta-ketoacyl synthase	Acidaminococcus intestini RyC-MR95	ketoacyl-synt	PF00109.22	Beta-ketoacyl_synthase_N-terminal_domain	253	gi|352684989|ref|YP_004896974.1|	-	418	2e-68	218.3	0.6	1	2	3.2e-68	4.9e-68	217.1	0.3	2	253	6	249	5	249	0.92
YP_004896974.1	beta-ketoacyl synthase [Acidaminococcus intestini RyC-MR95]	beta-ketoacyl synthase	Acidaminococcus intestini RyC-MR95	ketoacyl-synt	PF00109.22	Beta-ketoacyl_synthase_N-terminal_domain	253	gi|352684989|ref|YP_004896974.1|	-	418	2e-68	218.3	0.6	2	2	0.16	0.24	-1.4	0	86	124	276	311	270	355	0.67
YP_004896974.1	beta-ketoacyl synthase [Acidaminococcus intestini RyC-MR95]	beta-ketoacyl synthase	Acidaminococcus intestini RyC-MR95	Ketoacyl-synt_C	PF02801.18	Beta-ketoacyl_synthase_C-terminal_domain	118	gi|352684989|ref|YP_004896974.1|	-	418	2.8e-40	124.8	0.6	1	2	0.86	1.3	-3.1	0	44	55	160	171	150	176	0.75
YP_004896974.1	beta-ketoacyl synthase [Acidaminococcus intestini RyC-MR95]	beta-ketoacyl synthase	Acidaminococcus intestini RyC-MR95	Ketoacyl-synt_C	PF02801.18	Beta-ketoacyl_synthase_C-terminal_domain	118	gi|352684989|ref|YP_004896974.1|	-	418	2.8e-40	124.8	0.6	2	2	3.6e-40	5.5e-40	123.9	0.1	1	117	257	371	257	372	0.98
YP_004458484.1	acetyl-CoA C-acetyltransferase [Acidianus hospitalis W1]	acetyl-CoA C-acetyltransferase	Acidianus hospitalis W1	ketoacyl-synt	PF00109.22	Beta-ketoacyl_synthase_N-terminal_domain	253	gi|332796984|ref|YP_004458484.1|	-	355	8.6e-08	19.7	0.1	1	2	7.7e-08	2.3e-07	18.3	0	146	205	50	109	20	116	0.87
YP_004458484.1	acetyl-CoA C-acetyltransferase [Acidianus hospitalis W1]	acetyl-CoA C-acetyltransferase	Acidianus hospitalis W1	ketoacyl-synt	PF00109.22	Beta-ketoacyl_synthase_N-terminal_domain	253	gi|332796984|ref|YP_004458484.1|	-	355	8.6e-08	19.7	0.1	2	2	0.25	0.75	-3	0	238	250	205	217	204	219	0.84
YP_004459345.1	acetyl-CoA acetyltransferase [Acidianus hospitalis W1]	acetyl-CoA acetyltransferase	Acidianus hospitalis W1	ketoacyl-synt	PF00109.22	Beta-ketoacyl_synthase_N-terminal_domain	253	gi|332797845|ref|YP_004459345.1|	-	395	2.2e-10	28.2	3.1	1	3	0.012	0.037	1.2	0	93	119	31	57	27	74	0.76
YP_004459345.1	acetyl-CoA acetyltransferase [Acidianus hospitalis W1]	acetyl-CoA acetyltransferase	Acidianus hospitalis W1	ketoacyl-synt	PF00109.22	Beta-ketoacyl_synthase_N-terminal_domain	253	gi|332797845|ref|YP_004459345.1|	-	395	2.2e-10	28.2	3.1	2	3	7.4e-10	2.2e-09	24.9	1.8	169	207	82	120	78	135	0.87
YP_004459345.1	acetyl-CoA acetyltransferase [Acidianus hospitalis W1]	acetyl-CoA acetyltransferase	Acidianus hospitalis W1	ketoacyl-synt	PF00109.22	Beta-ketoacyl_synthase_N-terminal_domain	253	gi|332797845|ref|YP_004459345.1|	-	395	2.2e-10	28.2	3.1	3	3	0.24	0.73	-3	0	229	250	240	261	224	263	0.68
YP_003815465.1	3-ketoacyl-CoA thiolase [Acidilobus saccharovorans 345-15]	3-ketoacyl-CoA thiolase	Acidilobus saccharovorans 345-15	ketoacyl-synt	PF00109.22	Beta-ketoacyl_synthase_N-terminal_domain	253	gi|302347827|ref|YP_003815465.1|	-	396	1.5e-12	35.3	9.4	1	4	0.00013	0.0002	8.7	0	89	122	23	56	20	68	0.84
YP_003815465.1	3-ketoacyl-CoA thiolase [Acidilobus saccharovorans 345-15]	3-ketoacyl-CoA thiolase	Acidilobus saccharovorans 345-15	ketoacyl-synt	PF00109.22	Beta-ketoacyl_synthase_N-terminal_domain	253	gi|302347827|ref|YP_003815465.1|	-	396	1.5e-12	35.3	9.4	2	4	1.5e-10	2.3e-10	28.1	3.7	157	207	64	115	47	122	0.83
YP_003815465.1	3-ketoacyl-CoA thiolase [Acidilobus saccharovorans 345-15]	3-ketoacyl-CoA thiolase	Acidilobus saccharovorans 345-15	ketoacyl-synt	PF00109.22	Beta-ketoacyl_synthase_N-terminal_domain	253	gi|302347827|ref|YP_003815465.1|	-	396	1.5e-12	35.3	9.4	3	4	0.3	0.45	-2.3	0	238	252	210	224	199	225	0.87
YP_003815465.1	3-ketoacyl-CoA thiolase [Acidilobus saccharovorans 345-15]	3-ketoacyl-CoA thiolase	Acidilobus saccharovorans 345-15	ketoacyl-synt	PF00109.22	Beta-ketoacyl_synthase_N-terminal_domain	253	gi|302347827|ref|YP_003815465.1|	-	396	1.5e-12	35.3	9.4	4	4	0.093	0.14	-0.6	0.1	143	161	251	268	208	278	0.55
YP_003815465.1	3-ketoacyl-CoA thiolase [Acidilobus saccharovorans 345-15]	3-ketoacyl-CoA thiolase	Acidilobus saccharovorans 345-15	Ketoacyl-synt_C	PF02801.18	Beta-ketoacyl_synthase_C-terminal_domain	118	gi|302347827|ref|YP_003815465.1|	-	396	2.3e-06	15.4	1	1	3	4e-05	6.1e-05	10.8	0	24	49	24	49	4	57	0.77
YP_003815465.1	3-ketoacyl-CoA thiolase [Acidilobus saccharovorans 345-15]	3-ketoacyl-CoA thiolase	Acidilobus saccharovorans 345-15	Ketoacyl-synt_C	PF02801.18	Beta-ketoacyl_synthase_C-terminal_domain	118	gi|302347827|ref|YP_003815465.1|	-	396	2.3e-06	15.4	1	2	3	0.45	0.68	-2.2	0	25	42	258	275	240	287	0.79
YP_003815465.1	3-ketoacyl-CoA thiolase [Acidilobus saccharovorans 345-15]	3-ketoacyl-CoA thiolase	Acidilobus saccharovorans 345-15	Ketoacyl-synt_C	PF02801.18	Beta-ketoacyl_synthase_C-terminal_domain	118	gi|302347827|ref|YP_003815465.1|	-	396	2.3e-06	15.4	1	3	3	0.031	0.047	1.5	0.1	88	112	336	360	331	364	0.87
YP_003815759.1	3-ketoacyl-CoA thiolase [Acidilobus saccharovorans 345-15]	3-ketoacyl-CoA thiolase	Acidilobus saccharovorans 345-15	ketoacyl-synt	PF00109.22	Beta-ketoacyl_synthase_N-terminal_domain	253	gi|302348121|ref|YP_003815759.1|	-	397	4e-07	17.5	5.4	1	3	0.015	0.044	1	0	92	116	34	58	29	82	0.7
YP_003815759.1	3-ketoacyl-CoA thiolase [Acidilobus saccharovorans 345-15]	3-ketoacyl-CoA thiolase	Acidilobus saccharovorans 345-15	ketoacyl-synt	PF00109.22	Beta-ketoacyl_synthase_N-terminal_domain	253	gi|302348121|ref|YP_003815759.1|	-	397	4e-07	17.5	5.4	2	3	9.4e-07	2.8e-06	14.7	3.9	168	206	85	123	81	143	0.79
YP_003815759.1	3-ketoacyl-CoA thiolase [Acidilobus saccharovorans 345-15]	3-ketoacyl-CoA thiolase	Acidilobus saccharovorans 345-15	ketoacyl-synt	PF00109.22	Beta-ketoacyl_synthase_N-terminal_domain	253	gi|302348121|ref|YP_003815759.1|	-	397	4e-07	17.5	5.4	3	3	0.18	0.55	-2.6	0	87	107	256	276	244	289	0.73
YP_003816472.1	3-ketoacyl-CoA thiolase [Acidilobus saccharovorans 345-15]	3-ketoacyl-CoA thiolase	Acidilobus saccharovorans 345-15	ketoacyl-synt	PF00109.22	Beta-ketoacyl_synthase_N-terminal_domain	253	gi|302348834|ref|YP_003816472.1|	-	381	9.6e-11	29.4	0.1	1	2	2.9e-10	8.6e-10	26.3	0.2	155	222	62	130	47	144	0.86
YP_003816472.1	3-ketoacyl-CoA thiolase [Acidilobus saccharovorans 345-15]	3-ketoacyl-CoA thiolase	Acidilobus saccharovorans 345-15	ketoacyl-synt	PF00109.22	Beta-ketoacyl_synthase_N-terminal_domain	253	gi|302348834|ref|YP_003816472.1|	-	381	9.6e-11	29.4	0.1	2	2	0.029	0.087	0	0	233	250	199	221	179	224	0.72
YP_003108729.1	acetyl-CoA acetyltransferase [Acidimicrobium ferrooxidans DSM 10331]	acetyl-CoA acetyltransferase	Acidimicrobium ferrooxidans DSM 10331	ketoacyl-synt	PF00109.22	Beta-ketoacyl_synthase_N-terminal_domain	253	gi|256370905|ref|YP_003108729.1|	-	391	1.5e-06	15.6	1.2	1	1	1.2e-06	3.7e-06	14.3	1.2	169	206	83	120	70	129	0.92
YP_003108750.1	acetyl-CoA acetyltransferase [Acidimicrobium ferrooxidans DSM 10331]	acetyl-CoA acetyltransferase	Acidimicrobium ferrooxidans DSM 10331	ketoacyl-synt	PF00109.22	Beta-ketoacyl_synthase_N-terminal_domain	253	gi|256370926|ref|YP_003108750.1|	-	398	6.6e-06	13.5	6.7	1	4	0.044	0.066	0.4	0.1	94	119	32	57	25	74	0.71
YP_003108750.1	acetyl-CoA acetyltransferase [Acidimicrobium ferrooxidans DSM 10331]	acetyl-CoA acetyltransferase	Acidimicrobium ferrooxidans DSM 10331	ketoacyl-synt	PF00109.22	Beta-ketoacyl_synthase_N-terminal_domain	253	gi|256370926|ref|YP_003108750.1|	-	398	6.6e-06	13.5	6.7	2	4	6e-06	9.1e-06	13.1	1	159	206	72	119	63	132	0.86
YP_003108750.1	acetyl-CoA acetyltransferase [Acidimicrobium ferrooxidans DSM 10331]	acetyl-CoA acetyltransferase	Acidimicrobium ferrooxidans DSM 10331	ketoacyl-synt	PF00109.22	Beta-ketoacyl_synthase_N-terminal_domain	253	gi|256370926|ref|YP_003108750.1|	-	398	6.6e-06	13.5	6.7	3	4	0.043	0.064	0.5	0	234	253	247	266	226	266	0.8
YP_003108750.1	acetyl-CoA acetyltransferase [Acidimicrobium ferrooxidans DSM 10331]	acetyl-CoA acetyltransferase	Acidimicrobium ferrooxidans DSM 10331	ketoacyl-synt	PF00109.22	Beta-ketoacyl_synthase_N-terminal_domain	253	gi|256370926|ref|YP_003108750.1|	-	398	6.6e-06	13.5	6.7	4	4	0.42	0.63	-2.8	0	101	114	303	316	297	353	0.59
YP_003108750.1	acetyl-CoA acetyltransferase [Acidimicrobium ferrooxidans DSM 10331]	acetyl-CoA acetyltransferase	Acidimicrobium ferrooxidans DSM 10331	Ketoacyl-synt_C	PF02801.18	Beta-ketoacyl_synthase_C-terminal_domain	118	gi|256370926|ref|YP_003108750.1|	-	398	2.2e-07	18.7	0.7	1	2	8.2e-05	0.00012	9.9	0	27	48	31	52	3	55	0.8
YP_003108750.1	acetyl-CoA acetyltransferase [Acidimicrobium ferrooxidans DSM 10331]	acetyl-CoA acetyltransferase	Acidimicrobium ferrooxidans DSM 10331	Ketoacyl-synt_C	PF02801.18	Beta-ketoacyl_synthase_C-terminal_domain	118	gi|256370926|ref|YP_003108750.1|	-	398	2.2e-07	18.7	0.7	2	2	0.0041	0.0061	4.4	0.1	27	49	295	317	275	370	0.86
YP_003108903.1	acetyl-CoA acetyltransferase [Acidimicrobium ferrooxidans DSM 10331]	acetyl-CoA acetyltransferase	Acidimicrobium ferrooxidans DSM 10331	ketoacyl-synt	PF00109.22	Beta-ketoacyl_synthase_N-terminal_domain	253	gi|256371079|ref|YP_003108903.1|	-	390	7.6e-10	26.4	0	1	1	6.2e-10	1.9e-09	25.1	0	170	216	88	133	83	146	0.85
YP_003109692.1	3-oxoacyl-(acyl-carrier-protein) synthase III [Acidimicrobium ferrooxidans DSM 10331]	3-oxoacyl-(acyl-carrier-protein) synthase III	Acidimicrobium ferrooxidans DSM 10331	ketoacyl-synt	PF00109.22	Beta-ketoacyl_synthase_N-terminal_domain	253	gi|256371868|ref|YP_003109692.1|	-	306	1.2e-08	22.5	8.5	1	4	0.0017	0.005	4.1	0	77	110	39	70	12	73	0.76
YP_003109692.1	3-oxoacyl-(acyl-carrier-protein) synthase III [Acidimicrobium ferrooxidans DSM 10331]	3-oxoacyl-(acyl-carrier-protein) synthase III	Acidimicrobium ferrooxidans DSM 10331	ketoacyl-synt	PF00109.22	Beta-ketoacyl_synthase_N-terminal_domain	253	gi|256371868|ref|YP_003109692.1|	-	306	1.2e-08	22.5	8.5	2	4	1.9e-06	5.8e-06	13.7	2.4	153	200	86	133	73	140	0.85
YP_003109692.1	3-oxoacyl-(acyl-carrier-protein) synthase III [Acidimicrobium ferrooxidans DSM 10331]	3-oxoacyl-(acyl-carrier-protein) synthase III	Acidimicrobium ferrooxidans DSM 10331	ketoacyl-synt	PF00109.22	Beta-ketoacyl_synthase_N-terminal_domain	253	gi|256371868|ref|YP_003109692.1|	-	306	1.2e-08	22.5	8.5	3	4	0.0019	0.0058	3.9	0.2	229	252	141	166	133	167	0.79
YP_003109692.1	3-oxoacyl-(acyl-carrier-protein) synthase III [Acidimicrobium ferrooxidans DSM 10331]	3-oxoacyl-(acyl-carrier-protein) synthase III	Acidimicrobium ferrooxidans DSM 10331	ketoacyl-synt	PF00109.22	Beta-ketoacyl_synthase_N-terminal_domain	253	gi|256371868|ref|YP_003109692.1|	-	306	1.2e-08	22.5	8.5	4	4	0.0083	0.025	1.8	0	84	110	199	225	185	279	0.82
YP_003109695.1	beta-ketoacyl synthase [Acidimicrobium ferrooxidans DSM 10331]	beta-ketoacyl synthase	Acidimicrobium ferrooxidans DSM 10331	ketoacyl-synt	PF00109.22	Beta-ketoacyl_synthase_N-terminal_domain	253	gi|256371871|ref|YP_003109695.1|	-	401	3.2e-49	155.4	9.1	1	3	3.1e-07	4.6e-07	17.3	0.1	2	46	14	57	13	64	0.86
YP_003109695.1	beta-ketoacyl synthase [Acidimicrobium ferrooxidans DSM 10331]	beta-ketoacyl synthase	Acidimicrobium ferrooxidans DSM 10331	ketoacyl-synt	PF00109.22	Beta-ketoacyl_synthase_N-terminal_domain	253	gi|256371871|ref|YP_003109695.1|	-	401	3.2e-49	155.4	9.1	2	3	4.8e-45	7.2e-45	141.2	4.2	71	253	53	235	44	235	0.91
YP_003109695.1	beta-ketoacyl synthase [Acidimicrobium ferrooxidans DSM 10331]	beta-ketoacyl synthase	Acidimicrobium ferrooxidans DSM 10331	ketoacyl-synt	PF00109.22	Beta-ketoacyl_synthase_N-terminal_domain	253	gi|256371871|ref|YP_003109695.1|	-	401	3.2e-49	155.4	9.1	3	3	0.082	0.12	-0.5	0	97	112	273	288	268	311	0.8
YP_003109695.1	beta-ketoacyl synthase [Acidimicrobium ferrooxidans DSM 10331]	beta-ketoacyl synthase	Acidimicrobium ferrooxidans DSM 10331	Ketoacyl-synt_C	PF02801.18	Beta-ketoacyl_synthase_C-terminal_domain	118	gi|256371871|ref|YP_003109695.1|	-	401	2e-36	112.4	1.9	1	1	3e-36	4.5e-36	111.2	1.9	1	115	243	353	243	355	0.98
YP_003109969.1	acetyl-CoA acetyltransferase [Acidimicrobium ferrooxidans DSM 10331]	acetyl-CoA acetyltransferase	Acidimicrobium ferrooxidans DSM 10331	ketoacyl-synt	PF00109.22	Beta-ketoacyl_synthase_N-terminal_domain	253	gi|256372145|ref|YP_003109969.1|	-	399	2e-10	28.4	1.6	1	2	6.5e-11	2e-10	28.4	1.6	165	206	78	119	31	138	0.85
YP_003109969.1	acetyl-CoA acetyltransferase [Acidimicrobium ferrooxidans DSM 10331]	acetyl-CoA acetyltransferase	Acidimicrobium ferrooxidans DSM 10331	ketoacyl-synt	PF00109.22	Beta-ketoacyl_synthase_N-terminal_domain	253	gi|256372145|ref|YP_003109969.1|	-	399	2e-10	28.4	1.6	2	2	0.27	0.81	-3.1	0.2	89	119	362	390	359	394	0.59
YP_001234387.1	acetyl-CoA acetyltransferase [Acidiphilium cryptum JF-5]	acetyl-CoA acetyltransferase	Acidiphilium cryptum JF-5	ketoacyl-synt	PF00109.22	Beta-ketoacyl_synthase_N-terminal_domain	253	gi|148260260|ref|YP_001234387.1|	-	428	4.9e-09	23.8	0.2	1	2	5.2e-09	1.6e-08	22.1	0.1	157	225	76	146	73	157	0.78
YP_001234387.1	acetyl-CoA acetyltransferase [Acidiphilium cryptum JF-5]	acetyl-CoA acetyltransferase	Acidiphilium cryptum JF-5	ketoacyl-synt	PF00109.22	Beta-ketoacyl_synthase_N-terminal_domain	253	gi|148260260|ref|YP_001234387.1|	-	428	4.9e-09	23.8	0.2	2	2	0.13	0.39	-2.1	0	234	251	261	278	252	280	0.8
YP_001234655.1	3-oxoacyl-(acyl carrier protein) synthase II [Acidiphilium cryptum JF-5]	3-oxoacyl-(acyl carrier protein) synthase II	Acidiphilium cryptum JF-5	ketoacyl-synt	PF00109.22	Beta-ketoacyl_synthase_N-terminal_domain	253	gi|148260528|ref|YP_001234655.1|	-	422	4.3e-65	207.4	1.1	1	2	2.9e-65	4.3e-65	207.4	1.1	1	253	3	256	3	256	0.89
YP_001234655.1	3-oxoacyl-(acyl carrier protein) synthase II [Acidiphilium cryptum JF-5]	3-oxoacyl-(acyl carrier protein) synthase II	Acidiphilium cryptum JF-5	ketoacyl-synt	PF00109.22	Beta-ketoacyl_synthase_N-terminal_domain	253	gi|148260528|ref|YP_001234655.1|	-	422	4.3e-65	207.4	1.1	2	2	0.14	0.22	-1.3	0	93	112	290	309	280	360	0.69
YP_001234655.1	3-oxoacyl-(acyl carrier protein) synthase II [Acidiphilium cryptum JF-5]	3-oxoacyl-(acyl carrier protein) synthase II	Acidiphilium cryptum JF-5	Ketoacyl-synt_C	PF02801.18	Beta-ketoacyl_synthase_C-terminal_domain	118	gi|148260528|ref|YP_001234655.1|	-	422	1.8e-43	135.1	0.7	1	1	2.4e-43	3.6e-43	134.2	0.7	1	117	264	378	264	379	0.98
YP_001234701.1	acetyl-CoA acetyltransferase [Acidiphilium cryptum JF-5]	acetyl-CoA acetyltransferase	Acidiphilium cryptum JF-5	ketoacyl-synt	PF00109.22	Beta-ketoacyl_synthase_N-terminal_domain	253	gi|148260574|ref|YP_001234701.1|	-	390	1.1e-07	19.4	8.7	1	4	0.0016	0.0047	4.2	0	85	118	24	57	15	75	0.78
YP_001234701.1	acetyl-CoA acetyltransferase [Acidiphilium cryptum JF-5]	acetyl-CoA acetyltransferase	Acidiphilium cryptum JF-5	ketoacyl-synt	PF00109.22	Beta-ketoacyl_synthase_N-terminal_domain	253	gi|148260574|ref|YP_001234701.1|	-	390	1.1e-07	19.4	8.7	2	4	4.5e-08	1.4e-07	19.1	0.9	167	208	81	122	69	131	0.88
YP_001234701.1	acetyl-CoA acetyltransferase [Acidiphilium cryptum JF-5]	acetyl-CoA acetyltransferase	Acidiphilium cryptum JF-5	ketoacyl-synt	PF00109.22	Beta-ketoacyl_synthase_N-terminal_domain	253	gi|148260574|ref|YP_001234701.1|	-	390	1.1e-07	19.4	8.7	3	4	0.11	0.33	-1.9	0.1	118	126	201	209	147	262	0.5
YP_001234701.1	acetyl-CoA acetyltransferase [Acidiphilium cryptum JF-5]	acetyl-CoA acetyltransferase	Acidiphilium cryptum JF-5	ketoacyl-synt	PF00109.22	Beta-ketoacyl_synthase_N-terminal_domain	253	gi|148260574|ref|YP_001234701.1|	-	390	1.1e-07	19.4	8.7	4	4	0.17	0.51	-2.5	0.1	146	177	348	378	334	384	0.7
YP_001234968.1	beta-ketoadipyl CoA thiolase [Acidiphilium cryptum JF-5]	beta-ketoadipyl CoA thiolase	Acidiphilium cryptum JF-5	ketoacyl-synt	PF00109.22	Beta-ketoacyl_synthase_N-terminal_domain	253	gi|148260841|ref|YP_001234968.1|	-	400	9.8e-10	26.1	0.3	1	1	9.8e-10	2.9e-09	24.5	0.3	172	207	87	122	82	143	0.8
YP_001235370.1	acetyl-CoA acetyltransferase [Acidiphilium cryptum JF-5]	acetyl-CoA acetyltransferase	Acidiphilium cryptum JF-5	ketoacyl-synt	PF00109.22	Beta-ketoacyl_synthase_N-terminal_domain	253	gi|148261243|ref|YP_001235370.1|	-	390	7.8e-10	26.4	9.1	1	3	5.6e-05	0.00017	8.9	0.1	81	136	19	74	10	87	0.83
YP_001235370.1	acetyl-CoA acetyltransferase [Acidiphilium cryptum JF-5]	acetyl-CoA acetyltransferase	Acidiphilium cryptum JF-5	ketoacyl-synt	PF00109.22	Beta-ketoacyl_synthase_N-terminal_domain	253	gi|148261243|ref|YP_001235370.1|	-	390	7.8e-10	26.4	9.1	2	3	7.9e-09	2.4e-08	21.5	2	174	216	87	129	80	157	0.83
YP_001235370.1	acetyl-CoA acetyltransferase [Acidiphilium cryptum JF-5]	acetyl-CoA acetyltransferase	Acidiphilium cryptum JF-5	ketoacyl-synt	PF00109.22	Beta-ketoacyl_synthase_N-terminal_domain	253	gi|148261243|ref|YP_001235370.1|	-	390	7.8e-10	26.4	9.1	3	3	0.28	0.83	-3.2	0.1	234	253	244	263	223	263	0.62
YP_001235510.1	acetyl-CoA acetyltransferase [Acidiphilium cryptum JF-5]	acetyl-CoA acetyltransferase	Acidiphilium cryptum JF-5	ketoacyl-synt	PF00109.22	Beta-ketoacyl_synthase_N-terminal_domain	253	gi|148261383|ref|YP_001235510.1|	-	389	6.2e-10	26.7	0.1	1	2	0.0017	0.0026	5	0	90	118	24	52	12	71	0.84
YP_001235510.1	acetyl-CoA acetyltransferase [Acidiphilium cryptum JF-5]	acetyl-CoA acetyltransferase	Acidiphilium cryptum JF-5	ketoacyl-synt	PF00109.22	Beta-ketoacyl_synthase_N-terminal_domain	253	gi|148261383|ref|YP_001235510.1|	-	389	6.2e-10	26.7	0.1	2	2	1.1e-07	1.6e-07	18.8	0.1	171	206	81	116	77	135	0.85
YP_001235510.1	acetyl-CoA acetyltransferase [Acidiphilium cryptum JF-5]	acetyl-CoA acetyltransferase	Acidiphilium cryptum JF-5	Ketoacyl-synt_C	PF02801.18	Beta-ketoacyl_synthase_C-terminal_domain	118	gi|148261383|ref|YP_001235510.1|	-	389	8.1e-07	16.9	0.5	1	2	0.003	0.0045	4.8	0	26	47	26	47	5	50	0.79
YP_001235510.1	acetyl-CoA acetyltransferase [Acidiphilium cryptum JF-5]	acetyl-CoA acetyltransferase	Acidiphilium cryptum JF-5	Ketoacyl-synt_C	PF02801.18	Beta-ketoacyl_synthase_C-terminal_domain	118	gi|148261383|ref|YP_001235510.1|	-	389	8.1e-07	16.9	0.5	2	2	0.0002	0.0003	8.6	0.5	24	68	260	303	252	357	0.75
YP_004283526.1	acetyl-CoA acyltransferase [Acidiphilium multivorum AIU301]	acetyl-CoA acyltransferase	Acidiphilium multivorum AIU301	ketoacyl-synt	PF00109.22	Beta-ketoacyl_synthase_N-terminal_domain	253	gi|326403445|ref|YP_004283526.1|	-	428	5e-09	23.8	0.2	1	2	5.2e-09	1.6e-08	22.1	0.1	157	225	76	146	73	157	0.78
YP_004283526.1	acetyl-CoA acyltransferase [Acidiphilium multivorum AIU301]	acetyl-CoA acyltransferase	Acidiphilium multivorum AIU301	ketoacyl-synt	PF00109.22	Beta-ketoacyl_synthase_N-terminal_domain	253	gi|326403445|ref|YP_004283526.1|	-	428	5e-09	23.8	0.2	2	2	0.13	0.39	-2.1	0	234	251	261	278	252	280	0.8
YP_004283802.1	3-oxoacyl-ACP synthase II [Acidiphilium multivorum AIU301]	3-oxoacyl-ACP synthase II	Acidiphilium multivorum AIU301	ketoacyl-synt	PF00109.22	Beta-ketoacyl_synthase_N-terminal_domain	253	gi|326403720|ref|YP_004283802.1|	-	422	4.3e-65	207.4	1.1	1	2	2.9e-65	4.3e-65	207.4	1.1	1	253	3	256	3	256	0.89
YP_004283802.1	3-oxoacyl-ACP synthase II [Acidiphilium multivorum AIU301]	3-oxoacyl-ACP synthase II	Acidiphilium multivorum AIU301	ketoacyl-synt	PF00109.22	Beta-ketoacyl_synthase_N-terminal_domain	253	gi|326403720|ref|YP_004283802.1|	-	422	4.3e-65	207.4	1.1	2	2	0.14	0.22	-1.3	0	93	112	290	309	280	360	0.69
YP_004283802.1	3-oxoacyl-ACP synthase II [Acidiphilium multivorum AIU301]	3-oxoacyl-ACP synthase II	Acidiphilium multivorum AIU301	Ketoacyl-synt_C	PF02801.18	Beta-ketoacyl_synthase_C-terminal_domain	118	gi|326403720|ref|YP_004283802.1|	-	422	1.8e-43	135.1	0.7	1	1	2.4e-43	3.6e-43	134.2	0.7	1	117	264	378	264	379	0.98
YP_004283851.1	putative acetyl-CoA acyltransferase [Acidiphilium multivorum AIU301]	putative acetyl-CoA acyltransferase	Acidiphilium multivorum AIU301	ketoacyl-synt	PF00109.22	Beta-ketoacyl_synthase_N-terminal_domain	253	gi|326403769|ref|YP_004283851.1|	-	390	1.1e-07	19.4	8.7	1	4	0.0016	0.0047	4.2	0	85	118	24	57	15	75	0.78
YP_004283851.1	putative acetyl-CoA acyltransferase [Acidiphilium multivorum AIU301]	putative acetyl-CoA acyltransferase	Acidiphilium multivorum AIU301	ketoacyl-synt	PF00109.22	Beta-ketoacyl_synthase_N-terminal_domain	253	gi|326403769|ref|YP_004283851.1|	-	390	1.1e-07	19.4	8.7	2	4	4.5e-08	1.4e-07	19.1	0.9	167	208	81	122	69	131	0.88
YP_004283851.1	putative acetyl-CoA acyltransferase [Acidiphilium multivorum AIU301]	putative acetyl-CoA acyltransferase	Acidiphilium multivorum AIU301	ketoacyl-synt	PF00109.22	Beta-ketoacyl_synthase_N-terminal_domain	253	gi|326403769|ref|YP_004283851.1|	-	390	1.1e-07	19.4	8.7	3	4	0.11	0.33	-1.9	0.1	118	126	201	209	147	262	0.5
YP_004283851.1	putative acetyl-CoA acyltransferase [Acidiphilium multivorum AIU301]	putative acetyl-CoA acyltransferase	Acidiphilium multivorum AIU301	ketoacyl-synt	PF00109.22	Beta-ketoacyl_synthase_N-terminal_domain	253	gi|326403769|ref|YP_004283851.1|	-	390	1.1e-07	19.4	8.7	4	4	0.17	0.51	-2.5	0.1	146	177	348	378	334	384	0.7
YP_004284317.1	beta-ketoadipyl-CoA thiolase [Acidiphilium multivorum AIU301]	beta-ketoadipyl-CoA thiolase	Acidiphilium multivorum AIU301	ketoacyl-synt	PF00109.22	Beta-ketoacyl_synthase_N-terminal_domain	253	gi|326404235|ref|YP_004284317.1|	-	400	9.9e-10	26.1	0.3	1	1	9.8e-10	2.9e-09	24.5	0.3	172	207	87	122	82	143	0.8
YP_004284739.1	acetyl-CoA acetyltransferase [Acidiphilium multivorum AIU301]	acetyl-CoA acetyltransferase	Acidiphilium multivorum AIU301	ketoacyl-synt	PF00109.22	Beta-ketoacyl_synthase_N-terminal_domain	253	gi|326404657|ref|YP_004284739.1|	-	390	8.4e-10	26.3	9.5	1	3	6.2e-05	0.00019	8.8	0.1	81	136	19	74	10	85	0.83
YP_004284739.1	acetyl-CoA acetyltransferase [Acidiphilium multivorum AIU301]	acetyl-CoA acetyltransferase	Acidiphilium multivorum AIU301	ketoacyl-synt	PF00109.22	Beta-ketoacyl_synthase_N-terminal_domain	253	gi|326404657|ref|YP_004284739.1|	-	390	8.4e-10	26.3	9.5	2	3	6.6e-09	2e-08	21.8	2.2	174	217	87	130	80	158	0.84
YP_004284739.1	acetyl-CoA acetyltransferase [Acidiphilium multivorum AIU301]	acetyl-CoA acetyltransferase	Acidiphilium multivorum AIU301	ketoacyl-synt	PF00109.22	Beta-ketoacyl_synthase_N-terminal_domain	253	gi|326404657|ref|YP_004284739.1|	-	390	8.4e-10	26.3	9.5	3	3	0.28	0.83	-3.2	0.1	234	253	244	263	223	263	0.62
YP_004284954.1	putative acetyl-CoA acyltransferase [Acidiphilium multivorum AIU301]	putative acetyl-CoA acyltransferase	Acidiphilium multivorum AIU301	ketoacyl-synt	PF00109.22	Beta-ketoacyl_synthase_N-terminal_domain	253	gi|326404872|ref|YP_004284954.1|	-	389	6.1e-10	26.7	0.1	1	2	0.0017	0.0026	5	0	90	118	24	52	12	71	0.84
YP_004284954.1	putative acetyl-CoA acyltransferase [Acidiphilium multivorum AIU301]	putative acetyl-CoA acyltransferase	Acidiphilium multivorum AIU301	ketoacyl-synt	PF00109.22	Beta-ketoacyl_synthase_N-terminal_domain	253	gi|326404872|ref|YP_004284954.1|	-	389	6.1e-10	26.7	0.1	2	2	1.1e-07	1.6e-07	18.8	0.1	171	206	81	116	77	135	0.85
YP_004284954.1	putative acetyl-CoA acyltransferase [Acidiphilium multivorum AIU301]	putative acetyl-CoA acyltransferase	Acidiphilium multivorum AIU301	Ketoacyl-synt_C	PF02801.18	Beta-ketoacyl_synthase_C-terminal_domain	118	gi|326404872|ref|YP_004284954.1|	-	389	7.6e-07	17	0.5	1	2	0.003	0.0045	4.8	0	26	47	26	47	5	50	0.79
YP_004284954.1	putative acetyl-CoA acyltransferase [Acidiphilium multivorum AIU301]	putative acetyl-CoA acyltransferase	Acidiphilium multivorum AIU301	Ketoacyl-synt_C	PF02801.18	Beta-ketoacyl_synthase_C-terminal_domain	118	gi|326404872|ref|YP_004284954.1|	-	389	7.6e-07	17	0.5	2	2	0.0002	0.0003	8.6	0.5	24	68	260	303	252	357	0.75
YP_004748363.1	3-oxoacyl-ACP synthase [Acidithiobacillus caldus SM-1]	3-oxoacyl-ACP synthase	Acidithiobacillus caldus SM-1	ketoacyl-synt	PF00109.22	Beta-ketoacyl_synthase_N-terminal_domain	253	gi|340781756|ref|YP_004748363.1|	-	314	7.9e-06	13.3	6.7	1	3	0.0065	0.019	2.2	0.1	89	111	55	77	37	85	0.75
YP_004748363.1	3-oxoacyl-ACP synthase [Acidithiobacillus caldus SM-1]	3-oxoacyl-ACP synthase	Acidithiobacillus caldus SM-1	ketoacyl-synt	PF00109.22	Beta-ketoacyl_synthase_N-terminal_domain	253	gi|340781756|ref|YP_004748363.1|	-	314	7.9e-06	13.3	6.7	2	3	4.4e-06	1.3e-05	12.5	0.3	157	206	96	146	81	157	0.83
YP_004748363.1	3-oxoacyl-ACP synthase [Acidithiobacillus caldus SM-1]	3-oxoacyl-ACP synthase	Acidithiobacillus caldus SM-1	ketoacyl-synt	PF00109.22	Beta-ketoacyl_synthase_N-terminal_domain	253	gi|340781756|ref|YP_004748363.1|	-	314	7.9e-06	13.3	6.7	3	3	0.019	0.058	0.6	0.1	236	248	158	170	146	173	0.8
YP_004748367.1	3-oxoacyl-ACP synthase [Acidithiobacillus caldus SM-1]	3-oxoacyl-ACP synthase	Acidithiobacillus caldus SM-1	ketoacyl-synt	PF00109.22	Beta-ketoacyl_synthase_N-terminal_domain	253	gi|340781760|ref|YP_004748367.1|	-	398	4.6e-59	187.7	0.4	1	2	4.9e-59	7.4e-59	187	0.1	17	252	3	230	1	231	0.91
YP_004748367.1	3-oxoacyl-ACP synthase [Acidithiobacillus caldus SM-1]	3-oxoacyl-ACP synthase	Acidithiobacillus caldus SM-1	ketoacyl-synt	PF00109.22	Beta-ketoacyl_synthase_N-terminal_domain	253	gi|340781760|ref|YP_004748367.1|	-	398	4.6e-59	187.7	0.4	2	2	0.47	0.7	-2.9	0	95	110	267	282	264	324	0.68
YP_004748367.1	3-oxoacyl-ACP synthase [Acidithiobacillus caldus SM-1]	3-oxoacyl-ACP synthase	Acidithiobacillus caldus SM-1	Ketoacyl-synt_C	PF02801.18	Beta-ketoacyl_synthase_C-terminal_domain	118	gi|340781760|ref|YP_004748367.1|	-	398	1.2e-44	138.9	1	1	1	1.4e-44	2e-44	138.2	1	1	117	239	353	239	354	0.98
YP_004783917.1	3-oxoacyl-ACP synthase III [Acidithiobacillus ferrivorans SS3]	3-oxoacyl-ACP synthase III	Acidithiobacillus ferrivorans SS3	ketoacyl-synt	PF00109.22	Beta-ketoacyl_synthase_N-terminal_domain	253	gi|344199591|ref|YP_004783917.1|	-	314	4.2e-06	14.2	6.3	1	2	8.6e-06	2.6e-05	11.6	2.8	150	206	90	146	34	153	0.66
YP_004783917.1	3-oxoacyl-ACP synthase III [Acidithiobacillus ferrivorans SS3]	3-oxoacyl-ACP synthase III	Acidithiobacillus ferrivorans SS3	ketoacyl-synt	PF00109.22	Beta-ketoacyl_synthase_N-terminal_domain	253	gi|344199591|ref|YP_004783917.1|	-	314	4.2e-06	14.2	6.3	2	2	0.03	0.091	0	0.1	237	249	159	171	146	174	0.75
YP_004783921.1	3-oxoacyl-ACP synthase II [Acidithiobacillus ferrivorans SS3]	3-oxoacyl-ACP synthase II	Acidithiobacillus ferrivorans SS3	ketoacyl-synt	PF00109.22	Beta-ketoacyl_synthase_N-terminal_domain	253	gi|344199595|ref|YP_004783921.1|	-	413	9.9e-65	206.3	0.5	1	1	1.1e-64	1.6e-64	205.5	0.5	2	252	3	245	2	246	0.93
YP_004783921.1	3-oxoacyl-ACP synthase II [Acidithiobacillus ferrivorans SS3]	3-oxoacyl-ACP synthase II	Acidithiobacillus ferrivorans SS3	Ketoacyl-synt_C	PF02801.18	Beta-ketoacyl_synthase_C-terminal_domain	118	gi|344199595|ref|YP_004783921.1|	-	413	5.8e-45	139.9	0.4	1	1	6.7e-45	1e-44	139.2	0.4	1	117	254	368	254	369	0.98
YP_004784574.1	TonB-dependent receptor [Acidithiobacillus ferrivorans SS3]	TonB-dependent receptor	Acidithiobacillus ferrivorans SS3	Ketoacyl-synt_C	PF02801.18	Beta-ketoacyl_synthase_C-terminal_domain	118	gi|344200248|ref|YP_004784574.1|	-	787	9.5e-06	13.4	2.3	1	1	5.9e-06	1.8e-05	12.6	2.3	20	105	21	100	15	112	0.84
YP_004785246.1	hypothetical protein Acife_2845 [Acidithiobacillus ferrivorans SS3]	hypothetical protein Acife_2845	Acidithiobacillus ferrivorans SS3	ketoacyl-synt	PF00109.22	Beta-ketoacyl_synthase_N-terminal_domain	253	gi|344200920|ref|YP_004785246.1|	-	269	3.9e-07	17.5	1	1	2	0.055	0.17	-0.9	0	2	28	2	28	1	34	0.83
YP_004785246.1	hypothetical protein Acife_2845 [Acidithiobacillus ferrivorans SS3]	hypothetical protein Acife_2845	Acidithiobacillus ferrivorans SS3	ketoacyl-synt	PF00109.22	Beta-ketoacyl_synthase_N-terminal_domain	253	gi|344200920|ref|YP_004785246.1|	-	269	3.9e-07	17.5	1	2	2	4.1e-07	1.2e-06	15.9	0.9	77	199	45	164	39	168	0.82
YP_004785247.1	beta-ketoacyl synthase [Acidithiobacillus ferrivorans SS3]	beta-ketoacyl synthase	Acidithiobacillus ferrivorans SS3	ketoacyl-synt	PF00109.22	Beta-ketoacyl_synthase_N-terminal_domain	253	gi|344200921|ref|YP_004785247.1|	-	397	1.7e-24	74.4	3.2	1	2	1.2e-24	1.7e-24	74.4	3.2	87	249	77	234	4	236	0.72
YP_004785247.1	beta-ketoacyl synthase [Acidithiobacillus ferrivorans SS3]	beta-ketoacyl synthase	Acidithiobacillus ferrivorans SS3	ketoacyl-synt	PF00109.22	Beta-ketoacyl_synthase_N-terminal_domain	253	gi|344200921|ref|YP_004785247.1|	-	397	1.7e-24	74.4	3.2	2	2	0.019	0.029	1.6	1.3	114	170	321	390	268	391	0.56
YP_004785247.1	beta-ketoacyl synthase [Acidithiobacillus ferrivorans SS3]	beta-ketoacyl synthase	Acidithiobacillus ferrivorans SS3	Ketoacyl-synt_C	PF02801.18	Beta-ketoacyl_synthase_C-terminal_domain	118	gi|344200921|ref|YP_004785247.1|	-	397	1.4e-33	103.2	1.1	1	1	1.9e-33	2.8e-33	102.2	1.1	5	113	247	350	244	353	0.96
YP_002425283.1	hypothetical protein AFE_0795 [Acidithiobacillus ferrooxidans ATCC 23270]	hypothetical protein AFE_0795	Acidithiobacillus ferrooxidans ATCC 23270	ketoacyl-synt	PF00109.22	Beta-ketoacyl_synthase_N-terminal_domain	253	gi|218666885|ref|YP_002425283.1|	-	271	3.5e-06	14.4	0.5	1	1	1.6e-06	4.7e-06	14	0.5	78	187	48	154	31	167	0.8
YP_002425284.1	3-oxoacyl-ACP synthase [Acidithiobacillus ferrooxidans ATCC 23270]	3-oxoacyl-ACP synthase	Acidithiobacillus ferrooxidans ATCC 23270	ketoacyl-synt	PF00109.22	Beta-ketoacyl_synthase_N-terminal_domain	253	gi|218668137|ref|YP_002425284.1|	-	397	2e-27	84	0.8	1	2	1.2e-26	1.8e-26	80.9	0	99	249	76	234	54	236	0.82
YP_002425284.1	3-oxoacyl-ACP synthase [Acidithiobacillus ferrooxidans ATCC 23270]	3-oxoacyl-ACP synthase	Acidithiobacillus ferrooxidans ATCC 23270	ketoacyl-synt	PF00109.22	Beta-ketoacyl_synthase_N-terminal_domain	253	gi|218668137|ref|YP_002425284.1|	-	397	2e-27	84	0.8	2	2	0.035	0.053	0.7	0.1	115	115	324	324	268	392	0.45
YP_002425284.1	3-oxoacyl-ACP synthase [Acidithiobacillus ferrooxidans ATCC 23270]	3-oxoacyl-ACP synthase	Acidithiobacillus ferrooxidans ATCC 23270	Ketoacyl-synt_C	PF02801.18	Beta-ketoacyl_synthase_C-terminal_domain	118	gi|218668137|ref|YP_002425284.1|	-	397	2e-31	96.3	1.6	1	1	2.3e-31	3.5e-31	95.5	1.6	4	113	246	350	243	353	0.96
YP_002426319.1	3-oxoacyl-(acyl-carrier-protein) synthase III [Acidithiobacillus ferrooxidans ATCC 23270]	3-oxoacyl-(acyl-carrier-protein) synthase III	Acidithiobacillus ferrooxidans ATCC 23270	ketoacyl-synt	PF00109.22	Beta-ketoacyl_synthase_N-terminal_domain	253	gi|218665102|ref|YP_002426319.1|	-	314	4.7e-06	14	0.2	1	3	0.0098	0.029	1.6	0.2	91	111	57	77	44	88	0.85
YP_002426319.1	3-oxoacyl-(acyl-carrier-protein) synthase III [Acidithiobacillus ferrooxidans ATCC 23270]	3-oxoacyl-(acyl-carrier-protein) synthase III	Acidithiobacillus ferrooxidans ATCC 23270	ketoacyl-synt	PF00109.22	Beta-ketoacyl_synthase_N-terminal_domain	253	gi|218665102|ref|YP_002426319.1|	-	314	4.7e-06	14	0.2	2	3	1.6e-06	4.7e-06	14	0.2	165	208	105	148	80	153	0.84
YP_002426319.1	3-oxoacyl-(acyl-carrier-protein) synthase III [Acidithiobacillus ferrooxidans ATCC 23270]	3-oxoacyl-(acyl-carrier-protein) synthase III	Acidithiobacillus ferrooxidans ATCC 23270	ketoacyl-synt	PF00109.22	Beta-ketoacyl_synthase_N-terminal_domain	253	gi|218665102|ref|YP_002426319.1|	-	314	4.7e-06	14	0.2	3	3	0.016	0.047	0.9	0.2	237	249	159	171	147	174	0.77
YP_002426323.1	3-oxoacyl-(acyl-carrier-protein) synthase II [Acidithiobacillus ferrooxidans ATCC 23270]	3-oxoacyl-(acyl-carrier-protein) synthase II	Acidithiobacillus ferrooxidans ATCC 23270	ketoacyl-synt	PF00109.22	Beta-ketoacyl_synthase_N-terminal_domain	253	gi|218667697|ref|YP_002426323.1|	-	413	2.7e-63	201.6	0.6	1	1	3.2e-63	4.8e-63	200.7	0.6	2	252	3	245	2	246	0.93
YP_002426323.1	3-oxoacyl-(acyl-carrier-protein) synthase II [Acidithiobacillus ferrooxidans ATCC 23270]	3-oxoacyl-(acyl-carrier-protein) synthase II	Acidithiobacillus ferrooxidans ATCC 23270	Ketoacyl-synt_C	PF02801.18	Beta-ketoacyl_synthase_C-terminal_domain	118	gi|218667697|ref|YP_002426323.1|	-	413	1.2e-45	142.1	0.4	1	1	1.4e-45	2e-45	141.4	0.4	1	117	254	368	254	369	0.99
YP_002427377.1	polyketide synthase, type I [Acidithiobacillus ferrooxidans ATCC 23270]	polyketide synthase, type I	Acidithiobacillus ferrooxidans ATCC 23270	ketoacyl-synt	PF00109.22	Beta-ketoacyl_synthase_N-terminal_domain	253	gi|218667914|ref|YP_002427377.1|	-	2486	1.2e-80	258.4	0.5	1	1	1.6e-80	2.4e-80	257.4	0.5	2	253	4	251	3	251	0.94
YP_002427377.1	polyketide synthase, type I [Acidithiobacillus ferrooxidans ATCC 23270]	polyketide synthase, type I	Acidithiobacillus ferrooxidans ATCC 23270	Ketoacyl-synt_C	PF02801.18	Beta-ketoacyl_synthase_C-terminal_domain	118	gi|218667914|ref|YP_002427377.1|	-	2486	2.2e-43	134.8	0.5	1	1	3.3e-43	5e-43	133.7	0.5	1	117	259	376	259	377	0.98
YP_002219393.1	hypothetical protein Lferr_0938 [Acidithiobacillus ferrooxidans ATCC 53993]	hypothetical protein Lferr_0938	Acidithiobacillus ferrooxidans ATCC 53993	ketoacyl-synt	PF00109.22	Beta-ketoacyl_synthase_N-terminal_domain	253	gi|198283072|ref|YP_002219393.1|	-	271	3.5e-06	14.4	0.5	1	1	1.6e-06	4.7e-06	14	0.5	78	187	48	154	31	167	0.8
YP_002219394.1	3-oxoacyl-ACP synthase [Acidithiobacillus ferrooxidans ATCC 53993]	3-oxoacyl-ACP synthase	Acidithiobacillus ferrooxidans ATCC 53993	ketoacyl-synt	PF00109.22	Beta-ketoacyl_synthase_N-terminal_domain	253	gi|198283073|ref|YP_002219394.1|	-	397	2e-27	84	0.8	1	2	1.2e-26	1.8e-26	80.9	0	99	249	76	234	54	236	0.82
YP_002219394.1	3-oxoacyl-ACP synthase [Acidithiobacillus ferrooxidans ATCC 53993]	3-oxoacyl-ACP synthase	Acidithiobacillus ferrooxidans ATCC 53993	ketoacyl-synt	PF00109.22	Beta-ketoacyl_synthase_N-terminal_domain	253	gi|198283073|ref|YP_002219394.1|	-	397	2e-27	84	0.8	2	2	0.035	0.053	0.7	0.1	115	115	324	324	268	392	0.45
YP_002219394.1	3-oxoacyl-ACP synthase [Acidithiobacillus ferrooxidans ATCC 53993]	3-oxoacyl-ACP synthase	Acidithiobacillus ferrooxidans ATCC 53993	Ketoacyl-synt_C	PF02801.18	Beta-ketoacyl_synthase_C-terminal_domain	118	gi|198283073|ref|YP_002219394.1|	-	397	2e-31	96.3	1.6	1	1	2.3e-31	3.5e-31	95.5	1.6	4	113	246	350	243	353	0.96
YP_002220010.1	3-oxoacyl-(acyl-carrier-protein) synthase III [Acidithiobacillus ferrooxidans ATCC 53993]	3-oxoacyl-(acyl-carrier-protein) synthase III	Acidithiobacillus ferrooxidans ATCC 53993	ketoacyl-synt	PF00109.22	Beta-ketoacyl_synthase_N-terminal_domain	253	gi|198283689|ref|YP_002220010.1|	-	314	4.7e-06	14	0.2	1	3	0.0098	0.029	1.6	0.2	91	111	57	77	44	88	0.85
YP_002220010.1	3-oxoacyl-(acyl-carrier-protein) synthase III [Acidithiobacillus ferrooxidans ATCC 53993]	3-oxoacyl-(acyl-carrier-protein) synthase III	Acidithiobacillus ferrooxidans ATCC 53993	ketoacyl-synt	PF00109.22	Beta-ketoacyl_synthase_N-terminal_domain	253	gi|198283689|ref|YP_002220010.1|	-	314	4.7e-06	14	0.2	2	3	1.6e-06	4.7e-06	14	0.2	165	208	105	148	80	153	0.84
YP_002220010.1	3-oxoacyl-(acyl-carrier-protein) synthase III [Acidithiobacillus ferrooxidans ATCC 53993]	3-oxoacyl-(acyl-carrier-protein) synthase III	Acidithiobacillus ferrooxidans ATCC 53993	ketoacyl-synt	PF00109.22	Beta-ketoacyl_synthase_N-terminal_domain	253	gi|198283689|ref|YP_002220010.1|	-	314	4.7e-06	14	0.2	3	3	0.016	0.047	0.9	0.2	237	249	159	171	147	174	0.77
YP_002220014.1	3-oxoacyl-(acyl-carrier-protein) synthase 2 [Acidithiobacillus ferrooxidans ATCC 53993]	3-oxoacyl-(acyl-carrier-protein) synthase 2	Acidithiobacillus ferrooxidans ATCC 53993	ketoacyl-synt	PF00109.22	Beta-ketoacyl_synthase_N-terminal_domain	253	gi|198283693|ref|YP_002220014.1|	-	413	2.7e-63	201.6	0.6	1	1	3.2e-63	4.8e-63	200.7	0.6	2	252	3	245	2	246	0.93
YP_002220014.1	3-oxoacyl-(acyl-carrier-protein) synthase 2 [Acidithiobacillus ferrooxidans ATCC 53993]	3-oxoacyl-(acyl-carrier-protein) synthase 2	Acidithiobacillus ferrooxidans ATCC 53993	Ketoacyl-synt_C	PF02801.18	Beta-ketoacyl_synthase_C-terminal_domain	118	gi|198283693|ref|YP_002220014.1|	-	413	1.2e-45	142.1	0.4	1	1	1.4e-45	2e-45	141.4	0.4	1	117	254	368	254	369	0.99
YP_002221018.1	Beta-ketoacyl synthase [Acidithiobacillus ferrooxidans ATCC 53993]	Beta-ketoacyl synthase	Acidithiobacillus ferrooxidans ATCC 53993	ketoacyl-synt	PF00109.22	Beta-ketoacyl_synthase_N-terminal_domain	253	gi|198284697|ref|YP_002221018.1|	-	2486	1.2e-80	258.4	0.5	1	1	1.6e-80	2.4e-80	257.4	0.5	2	253	4	251	3	251	0.94
YP_002221018.1	Beta-ketoacyl synthase [Acidithiobacillus ferrooxidans ATCC 53993]	Beta-ketoacyl synthase	Acidithiobacillus ferrooxidans ATCC 53993	Ketoacyl-synt_C	PF02801.18	Beta-ketoacyl_synthase_C-terminal_domain	118	gi|198284697|ref|YP_002221018.1|	-	2486	2.2e-43	134.8	0.5	1	1	3.3e-43	5e-43	133.7	0.5	1	117	259	376	259	377	0.98
YP_002754258.1	polyketide synthase peptide synthetase fusion protein [Acidobacterium capsulatum ATCC 51196]	polyketide synthase peptide synthetase fusion protein	Acidobacterium capsulatum ATCC 51196	ketoacyl-synt	PF00109.22	Beta-ketoacyl_synthase_N-terminal_domain	253	gi|225872801|ref|YP_002754258.1|	-	3034	4e-99	318.9	0.4	1	2	1.9e-98	1.9e-98	316.7	0	2	253	44	292	43	292	0.98
YP_002754258.1	polyketide synthase peptide synthetase fusion protein [Acidobacterium capsulatum ATCC 51196]	polyketide synthase peptide synthetase fusion protein	Acidobacterium capsulatum ATCC 51196	ketoacyl-synt	PF00109.22	Beta-ketoacyl_synthase_N-terminal_domain	253	gi|225872801|ref|YP_002754258.1|	-	3034	4e-99	318.9	0.4	2	2	0.2	0.2	-1.2	0.1	95	137	628	674	613	733	0.57
YP_002754258.1	polyketide synthase peptide synthetase fusion protein [Acidobacterium capsulatum ATCC 51196]	polyketide synthase peptide synthetase fusion protein	Acidobacterium capsulatum ATCC 51196	Condensation	PF00668.16	Condensation_domain	301	gi|225872801|ref|YP_002754258.1|	-	3034	7.2e-131	423.3	0	1	2	2.1e-64	2.1e-64	205.1	0	3	299	1553	1835	1551	1837	0.95
YP_002754258.1	polyketide synthase peptide synthetase fusion protein [Acidobacterium capsulatum ATCC 51196]	polyketide synthase peptide synthetase fusion protein	Acidobacterium capsulatum ATCC 51196	Condensation	PF00668.16	Condensation_domain	301	gi|225872801|ref|YP_002754258.1|	-	3034	7.2e-131	423.3	0	2	2	1e-67	1e-67	216	0	2	297	2573	2871	2572	2874	0.93
YP_002754258.1	polyketide synthase peptide synthetase fusion protein [Acidobacterium capsulatum ATCC 51196]	polyketide synthase peptide synthetase fusion protein	Acidobacterium capsulatum ATCC 51196	Ketoacyl-synt_C	PF02801.18	Beta-ketoacyl_synthase_C-terminal_domain	118	gi|225872801|ref|YP_002754258.1|	-	3034	5.9e-45	139.9	3	1	3	7.3e-45	7.3e-45	139.6	0.6	1	117	300	415	300	416	0.97
YP_002754258.1	polyketide synthase peptide synthetase fusion protein [Acidobacterium capsulatum ATCC 51196]	polyketide synthase peptide synthetase fusion protein	Acidobacterium capsulatum ATCC 51196	Ketoacyl-synt_C	PF02801.18	Beta-ketoacyl_synthase_C-terminal_domain	118	gi|225872801|ref|YP_002754258.1|	-	3034	5.9e-45	139.9	3	2	3	1.4	1.4	-3.2	0	14	44	613	643	608	644	0.83
YP_002754258.1	polyketide synthase peptide synthetase fusion protein [Acidobacterium capsulatum ATCC 51196]	polyketide synthase peptide synthetase fusion protein	Acidobacterium capsulatum ATCC 51196	Ketoacyl-synt_C	PF02801.18	Beta-ketoacyl_synthase_C-terminal_domain	118	gi|225872801|ref|YP_002754258.1|	-	3034	5.9e-45	139.9	3	3	3	0.81	0.81	-2.5	0.1	9	44	1043	1078	1035	1099	0.73
YP_002754261.1	nonribosomal peptide synthetase [Acidobacterium capsulatum ATCC 51196]	nonribosomal peptide synthetase	Acidobacterium capsulatum ATCC 51196	Condensation	PF00668.16	Condensation_domain	301	gi|225872804|ref|YP_002754261.1|	-	3102	1.1e-192	626.3	0	1	3	1.2e-78	3.7e-78	250.2	0	5	298	819	1102	816	1105	0.97
YP_002754261.1	nonribosomal peptide synthetase [Acidobacterium capsulatum ATCC 51196]	nonribosomal peptide synthetase	Acidobacterium capsulatum ATCC 51196	Condensation	PF00668.16	Condensation_domain	301	gi|225872804|ref|YP_002754261.1|	-	3102	1.1e-192	626.3	0	2	3	8e-50	2.4e-49	155.7	0	4	300	1852	2136	1850	2137	0.88
YP_002754261.1	nonribosomal peptide synthetase [Acidobacterium capsulatum ATCC 51196]	nonribosomal peptide synthetase	Acidobacterium capsulatum ATCC 51196	Condensation	PF00668.16	Condensation_domain	301	gi|225872804|ref|YP_002754261.1|	-	3102	1.1e-192	626.3	0	3	3	2.1e-68	6.2e-68	216.7	0	3	300	2278	2576	2276	2577	0.95
YP_002754850.1	3-oxoacyl-ACP synthase [Acidobacterium capsulatum ATCC 51196]	3-oxoacyl-ACP synthase	Acidobacterium capsulatum ATCC 51196	ketoacyl-synt	PF00109.22	Beta-ketoacyl_synthase_N-terminal_domain	253	gi|225873391|ref|YP_002754850.1|	-	415	1.6e-61	195.8	2.9	1	2	1.5e-61	2.3e-61	195.2	1.1	2	253	4	247	3	247	0.92
YP_002754850.1	3-oxoacyl-ACP synthase [Acidobacterium capsulatum ATCC 51196]	3-oxoacyl-ACP synthase	Acidobacterium capsulatum ATCC 51196	ketoacyl-synt	PF00109.22	Beta-ketoacyl_synthase_N-terminal_domain	253	gi|225873391|ref|YP_002754850.1|	-	415	1.6e-61	195.8	2.9	2	2	0.072	0.11	-0.3	0	96	123	284	314	280	353	0.69
YP_002754850.1	3-oxoacyl-ACP synthase [Acidobacterium capsulatum ATCC 51196]	3-oxoacyl-ACP synthase	Acidobacterium capsulatum ATCC 51196	Ketoacyl-synt_C	PF02801.18	Beta-ketoacyl_synthase_C-terminal_domain	118	gi|225873391|ref|YP_002754850.1|	-	415	3.3e-42	131	0.4	1	1	4.1e-42	6.1e-42	130.2	0.4	1	117	255	371	255	372	0.99
YP_002755353.1	acetyl-CoA acetyltransferase family protein [Acidobacterium capsulatum ATCC 51196]	acetyl-CoA acetyltransferase family protein	Acidobacterium capsulatum ATCC 51196	ketoacyl-synt	PF00109.22	Beta-ketoacyl_synthase_N-terminal_domain	253	gi|225873894|ref|YP_002755353.1|	-	402	8.9e-12	32.8	2.5	1	2	0.00062	0.0019	5.5	0	90	128	35	73	31	85	0.84
YP_002755353.1	acetyl-CoA acetyltransferase family protein [Acidobacterium capsulatum ATCC 51196]	acetyl-CoA acetyltransferase family protein	Acidobacterium capsulatum ATCC 51196	ketoacyl-synt	PF00109.22	Beta-ketoacyl_synthase_N-terminal_domain	253	gi|225873894|ref|YP_002755353.1|	-	402	8.9e-12	32.8	2.5	2	2	3.1e-10	9.4e-10	26.1	0.8	169	208	89	128	84	149	0.86
YP_002755837.1	acetyl-CoA acetyltransferases/thiolase family protein [Acidobacterium capsulatum ATCC 51196]	acetyl-CoA acetyltransferases/thiolase family protein	Acidobacterium capsulatum ATCC 51196	ketoacyl-synt	PF00109.22	Beta-ketoacyl_synthase_N-terminal_domain	253	gi|225874378|ref|YP_002755837.1|	-	394	1.6e-09	25.4	1.1	1	3	5.3e-10	1.6e-09	25.4	1.1	153	205	66	121	34	135	0.83
YP_002755837.1	acetyl-CoA acetyltransferases/thiolase family protein [Acidobacterium capsulatum ATCC 51196]	acetyl-CoA acetyltransferases/thiolase family protein	Acidobacterium capsulatum ATCC 51196	ketoacyl-synt	PF00109.22	Beta-ketoacyl_synthase_N-terminal_domain	253	gi|225874378|ref|YP_002755837.1|	-	394	1.6e-09	25.4	1.1	2	3	0.34	1	-3.5	0	239	249	251	261	232	265	0.58
YP_002755837.1	acetyl-CoA acetyltransferases/thiolase family protein [Acidobacterium capsulatum ATCC 51196]	acetyl-CoA acetyltransferases/thiolase family protein	Acidobacterium capsulatum ATCC 51196	ketoacyl-synt	PF00109.22	Beta-ketoacyl_synthase_N-terminal_domain	253	gi|225874378|ref|YP_002755837.1|	-	394	1.6e-09	25.4	1.1	3	3	0.17	0.52	-2.5	0.1	186	202	368	384	353	387	0.8
YP_002756057.1	3-oxoacyl-ACP synthase [Acidobacterium capsulatum ATCC 51196]	3-oxoacyl-ACP synthase	Acidobacterium capsulatum ATCC 51196	ketoacyl-synt	PF00109.22	Beta-ketoacyl_synthase_N-terminal_domain	253	gi|225874598|ref|YP_002756057.1|	-	340	6.9e-06	13.5	3.1	1	2	6.9e-05	0.00021	8.6	3.2	146	211	94	160	62	184	0.85
YP_002756057.1	3-oxoacyl-ACP synthase [Acidobacterium capsulatum ATCC 51196]	3-oxoacyl-ACP synthase	Acidobacterium capsulatum ATCC 51196	ketoacyl-synt	PF00109.22	Beta-ketoacyl_synthase_N-terminal_domain	253	gi|225874598|ref|YP_002756057.1|	-	340	6.9e-06	13.5	3.1	2	2	0.056	0.17	-0.9	0	70	109	219	258	203	306	0.72
YP_872385.1	acetyl-CoA acetyltransferase [Acidothermus cellulolyticus 11B]	acetyl-CoA acetyltransferase	Acidothermus cellulolyticus 11B	ketoacyl-synt	PF00109.22	Beta-ketoacyl_synthase_N-terminal_domain	253	gi|117927834|ref|YP_872385.1|	-	391	1.4e-06	15.7	0.6	1	2	3.8e-06	1.1e-05	12.7	0.1	169	206	82	119	65	137	0.88
YP_872385.1	acetyl-CoA acetyltransferase [Acidothermus cellulolyticus 11B]	acetyl-CoA acetyltransferase	Acidothermus cellulolyticus 11B	ketoacyl-synt	PF00109.22	Beta-ketoacyl_synthase_N-terminal_domain	253	gi|117927834|ref|YP_872385.1|	-	391	1.4e-06	15.7	0.6	2	2	0.021	0.062	0.5	0	94	175	292	377	270	379	0.58
YP_872431.1	acetyl-CoA acetyltransferase [Acidothermus cellulolyticus 11B]	acetyl-CoA acetyltransferase	Acidothermus cellulolyticus 11B	ketoacyl-synt	PF00109.22	Beta-ketoacyl_synthase_N-terminal_domain	253	gi|117927880|ref|YP_872431.1|	-	392	4.6e-08	20.6	2	1	2	0.13	0.39	-2.1	0	91	122	27	58	23	71	0.72
YP_872431.1	acetyl-CoA acetyltransferase [Acidothermus cellulolyticus 11B]	acetyl-CoA acetyltransferase	Acidothermus cellulolyticus 11B	ketoacyl-synt	PF00109.22	Beta-ketoacyl_synthase_N-terminal_domain	253	gi|117927880|ref|YP_872431.1|	-	392	4.6e-08	20.6	2	2	2	4.1e-08	1.2e-07	19.2	1.4	164	208	75	119	58	129	0.87
YP_872634.1	3-oxoacyl-ACP synthase [Acidothermus cellulolyticus 11B]	3-oxoacyl-ACP synthase	Acidothermus cellulolyticus 11B	ketoacyl-synt	PF00109.22	Beta-ketoacyl_synthase_N-terminal_domain	253	gi|117928083|ref|YP_872634.1|	-	414	3.7e-61	194.5	1.8	1	2	3.9e-60	5.9e-60	190.6	1.3	2	251	9	247	8	249	0.93
YP_872634.1	3-oxoacyl-ACP synthase [Acidothermus cellulolyticus 11B]	3-oxoacyl-ACP synthase	Acidothermus cellulolyticus 11B	ketoacyl-synt	PF00109.22	Beta-ketoacyl_synthase_N-terminal_domain	253	gi|117928083|ref|YP_872634.1|	-	414	3.7e-61	194.5	1.8	2	2	0.013	0.019	2.2	0	85	112	275	302	266	334	0.85
YP_872634.1	3-oxoacyl-ACP synthase [Acidothermus cellulolyticus 11B]	3-oxoacyl-ACP synthase	Acidothermus cellulolyticus 11B	Ketoacyl-synt_C	PF02801.18	Beta-ketoacyl_synthase_C-terminal_domain	118	gi|117928083|ref|YP_872634.1|	-	414	6.4e-39	120.4	0.5	1	1	9.7e-39	1.5e-38	119.3	0.5	1	117	257	371	257	372	0.98
YP_872957.1	3-oxoacyl-ACP synthase [Acidothermus cellulolyticus 11B]	3-oxoacyl-ACP synthase	Acidothermus cellulolyticus 11B	ketoacyl-synt	PF00109.22	Beta-ketoacyl_synthase_N-terminal_domain	253	gi|117928406|ref|YP_872957.1|	-	412	6e-53	167.6	11.2	1	2	2.9e-52	4.3e-52	164.9	6.4	3	253	4	246	3	246	0.88
YP_872957.1	3-oxoacyl-ACP synthase [Acidothermus cellulolyticus 11B]	3-oxoacyl-ACP synthase	Acidothermus cellulolyticus 11B	ketoacyl-synt	PF00109.22	Beta-ketoacyl_synthase_N-terminal_domain	253	gi|117928406|ref|YP_872957.1|	-	412	6e-53	167.6	11.2	2	2	0.0013	0.002	5.4	0.2	84	133	271	319	264	356	0.59
YP_872957.1	3-oxoacyl-ACP synthase [Acidothermus cellulolyticus 11B]	3-oxoacyl-ACP synthase	Acidothermus cellulolyticus 11B	Ketoacyl-synt_C	PF02801.18	Beta-ketoacyl_synthase_C-terminal_domain	118	gi|117928406|ref|YP_872957.1|	-	412	9.4e-40	123.1	1.6	1	2	0.13	0.2	-0.5	0.1	12	39	86	113	75	147	0.74
YP_872957.1	3-oxoacyl-ACP synthase [Acidothermus cellulolyticus 11B]	3-oxoacyl-ACP synthase	Acidothermus cellulolyticus 11B	Ketoacyl-synt_C	PF02801.18	Beta-ketoacyl_synthase_C-terminal_domain	118	gi|117928406|ref|YP_872957.1|	-	412	9.4e-40	123.1	1.6	2	2	6.3e-40	9.4e-40	123.1	1.6	1	117	254	368	254	369	0.97
YP_004232535.1	acetyl-CoA acetyltransferase [Acidovorax avenae subsp. avenae ATCC 19860]	acetyl-CoA acetyltransferase	Acidovorax avenae subsp. avenae ATCC 19860	ketoacyl-synt	PF00109.22	Beta-ketoacyl_synthase_N-terminal_domain	253	gi|326314863|ref|YP_004232535.1|	-	396	1.2e-08	22.5	6.8	1	3	0.0052	0.016	2.5	0.1	88	124	28	64	24	77	0.83
YP_004232535.1	acetyl-CoA acetyltransferase [Acidovorax avenae subsp. avenae ATCC 19860]	acetyl-CoA acetyltransferase	Acidovorax avenae subsp. avenae ATCC 19860	ketoacyl-synt	PF00109.22	Beta-ketoacyl_synthase_N-terminal_domain	253	gi|326314863|ref|YP_004232535.1|	-	396	1.2e-08	22.5	6.8	2	3	1.1e-08	3.2e-08	21.1	1.6	167	206	83	122	72	143	0.84
YP_004232535.1	acetyl-CoA acetyltransferase [Acidovorax avenae subsp. avenae ATCC 19860]	acetyl-CoA acetyltransferase	Acidovorax avenae subsp. avenae ATCC 19860	ketoacyl-synt	PF00109.22	Beta-ketoacyl_synthase_N-terminal_domain	253	gi|326314863|ref|YP_004232535.1|	-	396	1.2e-08	22.5	6.8	3	3	0.076	0.23	-1.3	0	101	169	332	376	300	395	0.58
YP_004233386.1	3-oxoacyl-ACP synthase II [Acidovorax avenae subsp. avenae ATCC 19860]	3-oxoacyl-ACP synthase II	Acidovorax avenae subsp. avenae ATCC 19860	ketoacyl-synt	PF00109.22	Beta-ketoacyl_synthase_N-terminal_domain	253	gi|326315714|ref|YP_004233386.1|	-	449	6.7e-57	180.6	3.8	1	2	4.4e-57	6.7e-57	180.6	3.8	3	253	27	279	25	279	0.86
YP_004233386.1	3-oxoacyl-ACP synthase II [Acidovorax avenae subsp. avenae ATCC 19860]	3-oxoacyl-ACP synthase II	Acidovorax avenae subsp. avenae ATCC 19860	ketoacyl-synt	PF00109.22	Beta-ketoacyl_synthase_N-terminal_domain	253	gi|326315714|ref|YP_004233386.1|	-	449	6.7e-57	180.6	3.8	2	2	0.092	0.14	-0.6	0.4	99	123	319	346	312	386	0.5
YP_004233386.1	3-oxoacyl-ACP synthase II [Acidovorax avenae subsp. avenae ATCC 19860]	3-oxoacyl-ACP synthase II	Acidovorax avenae subsp. avenae ATCC 19860	Ketoacyl-synt_C	PF02801.18	Beta-ketoacyl_synthase_C-terminal_domain	118	gi|326315714|ref|YP_004233386.1|	-	449	2.3e-36	112.2	2.1	1	2	0.89	1.3	-3.2	0.1	28	41	110	123	92	125	0.64
YP_004233386.1	3-oxoacyl-ACP synthase II [Acidovorax avenae subsp. avenae ATCC 19860]	3-oxoacyl-ACP synthase II	Acidovorax avenae subsp. avenae ATCC 19860	Ketoacyl-synt_C	PF02801.18	Beta-ketoacyl_synthase_C-terminal_domain	118	gi|326315714|ref|YP_004233386.1|	-	449	2.3e-36	112.2	2.1	2	2	1.5e-36	2.3e-36	112.2	2.1	1	117	287	400	287	401	0.98
YP_004233686.1	3-oxoacyl-ACP synthase III [Acidovorax avenae subsp. avenae ATCC 19860]	3-oxoacyl-ACP synthase III	Acidovorax avenae subsp. avenae ATCC 19860	ketoacyl-synt	PF00109.22	Beta-ketoacyl_synthase_N-terminal_domain	253	gi|326316014|ref|YP_004233686.1|	-	325	2.1e-06	15.2	9.6	1	3	2.5e-06	7.6e-06	13.3	2.7	101	204	42	148	39	157	0.72
YP_004233686.1	3-oxoacyl-ACP synthase III [Acidovorax avenae subsp. avenae ATCC 19860]	3-oxoacyl-ACP synthase III	Acidovorax avenae subsp. avenae ATCC 19860	ketoacyl-synt	PF00109.22	Beta-ketoacyl_synthase_N-terminal_domain	253	gi|326316014|ref|YP_004233686.1|	-	325	2.1e-06	15.2	9.6	2	3	0.0051	0.015	2.5	0.2	236	251	162	177	151	178	0.82
YP_004233686.1	3-oxoacyl-ACP synthase III [Acidovorax avenae subsp. avenae ATCC 19860]	3-oxoacyl-ACP synthase III	Acidovorax avenae subsp. avenae ATCC 19860	ketoacyl-synt	PF00109.22	Beta-ketoacyl_synthase_N-terminal_domain	253	gi|326316014|ref|YP_004233686.1|	-	325	2.1e-06	15.2	9.6	3	3	0.28	0.83	-3.2	0	94	122	230	263	224	287	0.67
YP_004233690.1	3-oxoacyl-ACP synthase II [Acidovorax avenae subsp. avenae ATCC 19860]	3-oxoacyl-ACP synthase II	Acidovorax avenae subsp. avenae ATCC 19860	ketoacyl-synt	PF00109.22	Beta-ketoacyl_synthase_N-terminal_domain	253	gi|326316018|ref|YP_004233690.1|	-	414	4.7e-65	207.3	1.5	1	2	3.9e-65	5.8e-65	207	0.5	2	253	4	251	3	251	0.91
YP_004233690.1	3-oxoacyl-ACP synthase II [Acidovorax avenae subsp. avenae ATCC 19860]	3-oxoacyl-ACP synthase II	Acidovorax avenae subsp. avenae ATCC 19860	ketoacyl-synt	PF00109.22	Beta-ketoacyl_synthase_N-terminal_domain	253	gi|326316018|ref|YP_004233690.1|	-	414	4.7e-65	207.3	1.5	2	2	0.21	0.32	-1.8	0	97	114	287	304	283	344	0.66
YP_004233690.1	3-oxoacyl-ACP synthase II [Acidovorax avenae subsp. avenae ATCC 19860]	3-oxoacyl-ACP synthase II	Acidovorax avenae subsp. avenae ATCC 19860	Ketoacyl-synt_C	PF02801.18	Beta-ketoacyl_synthase_C-terminal_domain	118	gi|326316018|ref|YP_004233690.1|	-	414	2.1e-39	122	0.2	1	1	2.4e-39	3.7e-39	121.2	0.2	1	117	259	371	259	372	0.95
YP_004233865.1	3-ketoacyl-ACP synthase I [Acidovorax avenae subsp. avenae ATCC 19860]	3-ketoacyl-ACP synthase I	Acidovorax avenae subsp. avenae ATCC 19860	ketoacyl-synt	PF00109.22	Beta-ketoacyl_synthase_N-terminal_domain	253	gi|326316193|ref|YP_004233865.1|	-	416	5.2e-47	148.2	4.8	1	2	3.5e-47	5.2e-47	148.2	4.8	2	253	14	254	13	254	0.88
YP_004233865.1	3-ketoacyl-ACP synthase I [Acidovorax avenae subsp. avenae ATCC 19860]	3-ketoacyl-ACP synthase I	Acidovorax avenae subsp. avenae ATCC 19860	ketoacyl-synt	PF00109.22	Beta-ketoacyl_synthase_N-terminal_domain	253	gi|326316193|ref|YP_004233865.1|	-	416	5.2e-47	148.2	4.8	2	2	0.24	0.36	-2	0	115	168	340	405	299	408	0.6
YP_004233865.1	3-ketoacyl-ACP synthase I [Acidovorax avenae subsp. avenae ATCC 19860]	3-ketoacyl-ACP synthase I	Acidovorax avenae subsp. avenae ATCC 19860	Ketoacyl-synt_C	PF02801.18	Beta-ketoacyl_synthase_C-terminal_domain	118	gi|326316193|ref|YP_004233865.1|	-	416	2.1e-26	80.1	0.3	1	2	0.22	0.33	-1.2	0	27	46	88	107	80	154	0.72
YP_004233865.1	3-ketoacyl-ACP synthase I [Acidovorax avenae subsp. avenae ATCC 19860]	3-ketoacyl-ACP synthase I	Acidovorax avenae subsp. avenae ATCC 19860	Ketoacyl-synt_C	PF02801.18	Beta-ketoacyl_synthase_C-terminal_domain	118	gi|326316193|ref|YP_004233865.1|	-	416	2.1e-26	80.1	0.3	2	2	5e-26	7.5e-26	78.3	0	1	117	262	370	262	371	0.94
YP_004233867.1	3-ketoacyl-ACP synthase I [Acidovorax avenae subsp. avenae ATCC 19860]	3-ketoacyl-ACP synthase I	Acidovorax avenae subsp. avenae ATCC 19860	ketoacyl-synt	PF00109.22	Beta-ketoacyl_synthase_N-terminal_domain	253	gi|326316195|ref|YP_004233867.1|	-	408	6.3e-45	141.4	1.4	1	2	3.6e-44	5.4e-44	138.3	0.7	1	253	1	246	1	246	0.84
YP_004233867.1	3-ketoacyl-ACP synthase I [Acidovorax avenae subsp. avenae ATCC 19860]	3-ketoacyl-ACP synthase I	Acidovorax avenae subsp. avenae ATCC 19860	ketoacyl-synt	PF00109.22	Beta-ketoacyl_synthase_N-terminal_domain	253	gi|326316195|ref|YP_004233867.1|	-	408	6.3e-45	141.4	1.4	2	2	0.018	0.027	1.7	0	83	112	268	297	258	339	0.77
YP_004233867.1	3-ketoacyl-ACP synthase I [Acidovorax avenae subsp. avenae ATCC 19860]	3-ketoacyl-ACP synthase I	Acidovorax avenae subsp. avenae ATCC 19860	Ketoacyl-synt_C	PF02801.18	Beta-ketoacyl_synthase_C-terminal_domain	118	gi|326316195|ref|YP_004233867.1|	-	408	2.2e-32	99.3	0.1	1	1	2.9e-32	4.4e-32	98.4	0.1	1	117	254	363	254	364	0.95
YP_004233870.1	3-ketoacyl-ACP synthase I [Acidovorax avenae subsp. avenae ATCC 19860]	3-ketoacyl-ACP synthase I	Acidovorax avenae subsp. avenae ATCC 19860	ketoacyl-synt	PF00109.22	Beta-ketoacyl_synthase_N-terminal_domain	253	gi|326316198|ref|YP_004233870.1|	-	396	3.6e-26	79.9	0.5	1	2	0.16	0.24	-1.4	0.1	227	246	18	37	14	38	0.88
YP_004233870.1	3-ketoacyl-ACP synthase I [Acidovorax avenae subsp. avenae ATCC 19860]	3-ketoacyl-ACP synthase I	Acidovorax avenae subsp. avenae ATCC 19860	ketoacyl-synt	PF00109.22	Beta-ketoacyl_synthase_N-terminal_domain	253	gi|326316198|ref|YP_004233870.1|	-	396	3.6e-26	79.9	0.5	2	2	2.4e-26	3.6e-26	79.9	0.5	111	250	94	233	70	235	0.8
YP_004233870.1	3-ketoacyl-ACP synthase I [Acidovorax avenae subsp. avenae ATCC 19860]	3-ketoacyl-ACP synthase I	Acidovorax avenae subsp. avenae ATCC 19860	Ketoacyl-synt_C	PF02801.18	Beta-ketoacyl_synthase_C-terminal_domain	118	gi|326316198|ref|YP_004233870.1|	-	396	3e-29	89.2	0.1	1	1	4e-29	6e-29	88.3	0.1	3	115	238	345	237	346	0.96
YP_004234842.1	acetyl-CoA acetyltransferase [Acidovorax avenae subsp. avenae ATCC 19860]	acetyl-CoA acetyltransferase	Acidovorax avenae subsp. avenae ATCC 19860	ketoacyl-synt	PF00109.22	Beta-ketoacyl_synthase_N-terminal_domain	253	gi|326317170|ref|YP_004234842.1|	-	391	6.3e-10	26.7	3.5	1	2	0.045	0.14	-0.6	0.1	90	121	29	56	18	82	0.77
YP_004234842.1	acetyl-CoA acetyltransferase [Acidovorax avenae subsp. avenae ATCC 19860]	acetyl-CoA acetyltransferase	Acidovorax avenae subsp. avenae ATCC 19860	ketoacyl-synt	PF00109.22	Beta-ketoacyl_synthase_N-terminal_domain	253	gi|326317170|ref|YP_004234842.1|	-	391	6.3e-10	26.7	3.5	2	2	4.7e-10	1.4e-09	25.6	1.9	165	209	80	124	56	143	0.78
YP_004235210.1	acetyl-CoA acetyltransferase [Acidovorax avenae subsp. avenae ATCC 19860]	acetyl-CoA acetyltransferase	Acidovorax avenae subsp. avenae ATCC 19860	ketoacyl-synt	PF00109.22	Beta-ketoacyl_synthase_N-terminal_domain	253	gi|326317538|ref|YP_004235210.1|	-	393	7.6e-09	23.2	2.1	1	3	0.0043	0.013	2.7	0	87	133	25	71	18	79	0.79
YP_004235210.1	acetyl-CoA acetyltransferase [Acidovorax avenae subsp. avenae ATCC 19860]	acetyl-CoA acetyltransferase	Acidovorax avenae subsp. avenae ATCC 19860	ketoacyl-synt	PF00109.22	Beta-ketoacyl_synthase_N-terminal_domain	253	gi|326317538|ref|YP_004235210.1|	-	393	7.6e-09	23.2	2.1	2	3	2.5e-09	7.6e-09	23.2	2.1	167	206	80	119	76	134	0.89
YP_004235210.1	acetyl-CoA acetyltransferase [Acidovorax avenae subsp. avenae ATCC 19860]	acetyl-CoA acetyltransferase	Acidovorax avenae subsp. avenae ATCC 19860	ketoacyl-synt	PF00109.22	Beta-ketoacyl_synthase_N-terminal_domain	253	gi|326317538|ref|YP_004235210.1|	-	393	7.6e-09	23.2	2.1	3	3	0.12	0.35	-2	0.2	232	252	239	264	199	265	0.68
YP_004235458.1	propanoyl-CoA C-acyltransferase [Acidovorax avenae subsp. avenae ATCC 19860]	propanoyl-CoA C-acyltransferase	Acidovorax avenae subsp. avenae ATCC 19860	ketoacyl-synt	PF00109.22	Beta-ketoacyl_synthase_N-terminal_domain	253	gi|326317786|ref|YP_004235458.1|	-	394	2.8e-06	14.7	7.4	1	2	2.7e-06	4.1e-06	14.2	4.9	137	208	41	114	5	137	0.74
YP_004235458.1	propanoyl-CoA C-acyltransferase [Acidovorax avenae subsp. avenae ATCC 19860]	propanoyl-CoA C-acyltransferase	Acidovorax avenae subsp. avenae ATCC 19860	ketoacyl-synt	PF00109.22	Beta-ketoacyl_synthase_N-terminal_domain	253	gi|326317786|ref|YP_004235458.1|	-	394	2.8e-06	14.7	7.4	2	2	0.12	0.18	-1	0	106	135	251	280	234	302	0.67
YP_004235458.1	propanoyl-CoA C-acyltransferase [Acidovorax avenae subsp. avenae ATCC 19860]	propanoyl-CoA C-acyltransferase	Acidovorax avenae subsp. avenae ATCC 19860	Ketoacyl-synt_C	PF02801.18	Beta-ketoacyl_synthase_C-terminal_domain	118	gi|326317786|ref|YP_004235458.1|	-	394	9.8e-07	16.6	8.1	1	3	0.0038	0.0058	4.5	1.2	15	47	17	49	5	112	0.68
YP_004235458.1	propanoyl-CoA C-acyltransferase [Acidovorax avenae subsp. avenae ATCC 19860]	propanoyl-CoA C-acyltransferase	Acidovorax avenae subsp. avenae ATCC 19860	Ketoacyl-synt_C	PF02801.18	Beta-ketoacyl_synthase_C-terminal_domain	118	gi|326317786|ref|YP_004235458.1|	-	394	9.8e-07	16.6	8.1	2	3	1.2e-05	1.8e-05	12.5	0.1	24	51	267	294	242	300	0.83
YP_004235458.1	propanoyl-CoA C-acyltransferase [Acidovorax avenae subsp. avenae ATCC 19860]	propanoyl-CoA C-acyltransferase	Acidovorax avenae subsp. avenae ATCC 19860	Ketoacyl-synt_C	PF02801.18	Beta-ketoacyl_synthase_C-terminal_domain	118	gi|326317786|ref|YP_004235458.1|	-	394	9.8e-07	16.6	8.1	3	3	0.047	0.071	0.9	0.1	88	107	342	361	340	365	0.86
YP_004236111.1	amino acid adenylation domain-containing protein [Acidovorax avenae subsp. avenae ATCC 19860]	amino acid adenylation domain-containing protein	Acidovorax avenae subsp. avenae ATCC 19860	Condensation	PF00668.16	Condensation_domain	301	gi|326318439|ref|YP_004236111.1|	-	1375	1.9e-50	159.3	0	1	1	8.1e-51	2.4e-50	158.9	0	3	300	46	354	44	355	0.94
YP_004236112.1	amino acid adenylation domain-containing protein [Acidovorax avenae subsp. avenae ATCC 19860]	amino acid adenylation domain-containing protein	Acidovorax avenae subsp. avenae ATCC 19860	Condensation	PF00668.16	Condensation_domain	301	gi|326318440|ref|YP_004236112.1|	-	2678	1.4e-186	606.2	0	1	3	2.7e-77	8e-77	245.9	0	4	300	58	359	55	360	0.96
YP_004236112.1	amino acid adenylation domain-containing protein [Acidovorax avenae subsp. avenae ATCC 19860]	amino acid adenylation domain-containing protein	Acidovorax avenae subsp. avenae ATCC 19860	Condensation	PF00668.16	Condensation_domain	301	gi|326318440|ref|YP_004236112.1|	-	2678	1.4e-186	606.2	0	2	3	3.1e-57	9.2e-57	180	0	2	299	1125	1430	1124	1432	0.91
YP_004236112.1	amino acid adenylation domain-containing protein [Acidovorax avenae subsp. avenae ATCC 19860]	amino acid adenylation domain-containing protein	Acidovorax avenae subsp. avenae ATCC 19860	Condensation	PF00668.16	Condensation_domain	301	gi|326318440|ref|YP_004236112.1|	-	2678	1.4e-186	606.2	0	3	3	2.6e-56	7.9e-56	176.9	0	2	299	1597	1905	1596	1907	0.9
YP_004236113.1	amino acid adenylation domain-containing protein [Acidovorax avenae subsp. avenae ATCC 19860]	amino acid adenylation domain-containing protein	Acidovorax avenae subsp. avenae ATCC 19860	Condensation	PF00668.16	Condensation_domain	301	gi|326318441|ref|YP_004236113.1|	-	1127	6.6e-64	203.5	0	1	1	3.5e-64	1e-63	202.8	0	4	300	57	362	55	363	0.91
YP_004236114.1	6-deoxyerythronolide-B synthase [Acidovorax avenae subsp. avenae ATCC 19860]	6-deoxyerythronolide-B synthase	Acidovorax avenae subsp. avenae ATCC 19860	ketoacyl-synt	PF00109.22	Beta-ketoacyl_synthase_N-terminal_domain	253	gi|326318442|ref|YP_004236114.1|	-	1529	3.8e-74	237.1	0.1	1	1	5.6e-74	8.4e-74	236	0.1	3	253	19	271	18	271	0.91
YP_004236114.1	6-deoxyerythronolide-B synthase [Acidovorax avenae subsp. avenae ATCC 19860]	6-deoxyerythronolide-B synthase	Acidovorax avenae subsp. avenae ATCC 19860	Ketoacyl-synt_C	PF02801.18	Beta-ketoacyl_synthase_C-terminal_domain	118	gi|326318442|ref|YP_004236114.1|	-	1529	3.2e-44	137.5	2.4	1	1	5.5e-44	8.2e-44	136.2	2.4	1	117	279	397	279	398	0.98
YP_004236115.1	amino acid adenylation domain-containing protein [Acidovorax avenae subsp. avenae ATCC 19860]	amino acid adenylation domain-containing protein	Acidovorax avenae subsp. avenae ATCC 19860	Condensation	PF00668.16	Condensation_domain	301	gi|326318443|ref|YP_004236115.1|	-	1785	1.4e-57	182.6	0	1	1	7.2e-58	2.2e-57	182.1	0	6	296	705	999	701	1003	0.94
YP_004236299.1	beta-ketoadipyl CoA thiolase [Acidovorax avenae subsp. avenae ATCC 19860]	beta-ketoadipyl CoA thiolase	Acidovorax avenae subsp. avenae ATCC 19860	ketoacyl-synt	PF00109.22	Beta-ketoacyl_synthase_N-terminal_domain	253	gi|326318627|ref|YP_004236299.1|	-	402	9.7e-09	22.8	1.1	1	2	6.3e-09	1.9e-08	21.9	0.3	175	206	92	123	81	144	0.82
YP_004236299.1	beta-ketoadipyl CoA thiolase [Acidovorax avenae subsp. avenae ATCC 19860]	beta-ketoadipyl CoA thiolase	Acidovorax avenae subsp. avenae ATCC 19860	ketoacyl-synt	PF00109.22	Beta-ketoacyl_synthase_N-terminal_domain	253	gi|326318627|ref|YP_004236299.1|	-	402	9.7e-09	22.8	1.1	2	2	0.21	0.62	-2.8	0	146	175	360	388	321	389	0.75
YP_004236457.1	acetyl-CoA acetyltransferase [Acidovorax avenae subsp. avenae ATCC 19860]	acetyl-CoA acetyltransferase	Acidovorax avenae subsp. avenae ATCC 19860	ketoacyl-synt	PF00109.22	Beta-ketoacyl_synthase_N-terminal_domain	253	gi|326318785|ref|YP_004236457.1|	-	399	1.1e-10	29.2	1.7	1	1	9.7e-11	2.9e-10	27.8	1.3	170	206	90	126	87	140	0.88
YP_004236507.1	3-ketoacyl-ACP synthase I [Acidovorax avenae subsp. avenae ATCC 19860]	3-ketoacyl-ACP synthase I	Acidovorax avenae subsp. avenae ATCC 19860	ketoacyl-synt	PF00109.22	Beta-ketoacyl_synthase_N-terminal_domain	253	gi|326318835|ref|YP_004236507.1|	-	408	1e-48	153.8	4	1	1	9.8e-49	1.5e-48	153.3	4	2	253	5	247	4	247	0.9
YP_004236507.1	3-ketoacyl-ACP synthase I [Acidovorax avenae subsp. avenae ATCC 19860]	3-ketoacyl-ACP synthase I	Acidovorax avenae subsp. avenae ATCC 19860	Ketoacyl-synt_C	PF02801.18	Beta-ketoacyl_synthase_C-terminal_domain	118	gi|326318835|ref|YP_004236507.1|	-	408	1.9e-30	93.1	0.6	1	3	0.0099	0.015	3.1	0	27	46	79	98	62	114	0.83
YP_004236507.1	3-ketoacyl-ACP synthase I [Acidovorax avenae subsp. avenae ATCC 19860]	3-ketoacyl-ACP synthase I	Acidovorax avenae subsp. avenae ATCC 19860	Ketoacyl-synt_C	PF02801.18	Beta-ketoacyl_synthase_C-terminal_domain	118	gi|326318835|ref|YP_004236507.1|	-	408	1.9e-30	93.1	0.6	2	3	0.41	0.62	-2.1	0.1	78	95	158	175	147	185	0.82
YP_004236507.1	3-ketoacyl-ACP synthase I [Acidovorax avenae subsp. avenae ATCC 19860]	3-ketoacyl-ACP synthase I	Acidovorax avenae subsp. avenae ATCC 19860	Ketoacyl-synt_C	PF02801.18	Beta-ketoacyl_synthase_C-terminal_domain	118	gi|326318835|ref|YP_004236507.1|	-	408	1.9e-30	93.1	0.6	3	3	7.8e-29	1.2e-28	87.3	0	2	117	256	362	255	363	0.94
YP_004237041.1	amino acid adenylation domain-containing protein [Acidovorax avenae subsp. avenae ATCC 19860]	amino acid adenylation domain-containing protein	Acidovorax avenae subsp. avenae ATCC 19860	Condensation	PF00668.16	Condensation_domain	301	gi|326319369|ref|YP_004237041.1|	-	1449	2.1e-49	155.8	0	1	1	1.2e-49	3.6e-49	155.1	0	5	300	11	304	8	305	0.94
YP_968422.1	beta-ketothiolase [Acidovorax citrulli AAC00-1]	beta-ketothiolase	Acidovorax citrulli AAC00-1	ketoacyl-synt	PF00109.22	Beta-ketoacyl_synthase_N-terminal_domain	253	gi|120608744|ref|YP_968422.1|	-	398	8.2e-09	23	6.5	1	3	0.0046	0.014	2.6	0.1	87	124	29	66	20	79	0.84
YP_968422.1	beta-ketothiolase [Acidovorax citrulli AAC00-1]	beta-ketothiolase	Acidovorax citrulli AAC00-1	ketoacyl-synt	PF00109.22	Beta-ketoacyl_synthase_N-terminal_domain	253	gi|120608744|ref|YP_968422.1|	-	398	8.2e-09	23	6.5	2	3	6.9e-09	2.1e-08	21.7	1.3	166	207	84	125	73	145	0.82
YP_968422.1	beta-ketothiolase [Acidovorax citrulli AAC00-1]	beta-ketothiolase	Acidovorax citrulli AAC00-1	ketoacyl-synt	PF00109.22	Beta-ketoacyl_synthase_N-terminal_domain	253	gi|120608744|ref|YP_968422.1|	-	398	8.2e-09	23	6.5	3	3	0.096	0.29	-1.7	0	101	165	334	374	311	394	0.56
YP_969549.1	3-oxoacyl-ACP synthase [Acidovorax citrulli AAC00-1]	3-oxoacyl-ACP synthase	Acidovorax citrulli AAC00-1	ketoacyl-synt	PF00109.22	Beta-ketoacyl_synthase_N-terminal_domain	253	gi|120609871|ref|YP_969549.1|	-	325	2.4e-06	15	8.8	1	3	5.8e-06	1.7e-05	12.2	2.6	104	204	45	148	41	157	0.69
YP_969549.1	3-oxoacyl-ACP synthase [Acidovorax citrulli AAC00-1]	3-oxoacyl-ACP synthase	Acidovorax citrulli AAC00-1	ketoacyl-synt	PF00109.22	Beta-ketoacyl_synthase_N-terminal_domain	253	gi|120609871|ref|YP_969549.1|	-	325	2.4e-06	15	8.8	2	3	0.0051	0.015	2.5	0.2	236	251	162	177	151	178	0.82
YP_969549.1	3-oxoacyl-ACP synthase [Acidovorax citrulli AAC00-1]	3-oxoacyl-ACP synthase	Acidovorax citrulli AAC00-1	ketoacyl-synt	PF00109.22	Beta-ketoacyl_synthase_N-terminal_domain	253	gi|120609871|ref|YP_969549.1|	-	325	2.4e-06	15	8.8	3	3	0.37	1.1	-3.6	0	94	111	230	252	225	285	0.67
YP_969553.1	3-oxoacyl-[acyl-carrier-protein] synthase II [Acidovorax citrulli AAC00-1]	3-oxoacyl-acyl-carrier-protein synthase II	Acidovorax citrulli AAC00-1	ketoacyl-synt	PF00109.22	Beta-ketoacyl_synthase_N-terminal_domain	253	gi|120609875|ref|YP_969553.1|	-	414	6e-65	207	1.3	1	2	5.1e-65	7.7e-65	206.6	0.3	2	253	4	251	3	251	0.91
YP_969553.1	3-oxoacyl-[acyl-carrier-protein] synthase II [Acidovorax citrulli AAC00-1]	3-oxoacyl-acyl-carrier-protein synthase II	Acidovorax citrulli AAC00-1	ketoacyl-synt	PF00109.22	Beta-ketoacyl_synthase_N-terminal_domain	253	gi|120609875|ref|YP_969553.1|	-	414	6e-65	207	1.3	2	2	0.24	0.36	-2	0	98	114	288	304	284	344	0.65
YP_969553.1	3-oxoacyl-[acyl-carrier-protein] synthase II [Acidovorax citrulli AAC00-1]	3-oxoacyl-acyl-carrier-protein synthase II	Acidovorax citrulli AAC00-1	Ketoacyl-synt_C	PF02801.18	Beta-ketoacyl_synthase_C-terminal_domain	118	gi|120609875|ref|YP_969553.1|	-	414	1.1e-39	123	0.3	1	1	1.2e-39	1.8e-39	122.2	0.3	1	117	259	371	259	372	0.95
YP_970827.1	acetyl-CoA acetyltransferase [Acidovorax citrulli AAC00-1]	acetyl-CoA acetyltransferase	Acidovorax citrulli AAC00-1	ketoacyl-synt	PF00109.22	Beta-ketoacyl_synthase_N-terminal_domain	253	gi|120611149|ref|YP_970827.1|	-	393	3.7e-09	24.2	8	1	3	0.0039	0.012	2.9	0.1	87	135	25	73	19	79	0.8
YP_970827.1	acetyl-CoA acetyltransferase [Acidovorax citrulli AAC00-1]	acetyl-CoA acetyltransferase	Acidovorax citrulli AAC00-1	ketoacyl-synt	PF00109.22	Beta-ketoacyl_synthase_N-terminal_domain	253	gi|120611149|ref|YP_970827.1|	-	393	3.7e-09	24.2	8	2	3	2.8e-09	8.3e-09	23	2.2	167	206	80	119	76	132	0.89
YP_970827.1	acetyl-CoA acetyltransferase [Acidovorax citrulli AAC00-1]	acetyl-CoA acetyltransferase	Acidovorax citrulli AAC00-1	ketoacyl-synt	PF00109.22	Beta-ketoacyl_synthase_N-terminal_domain	253	gi|120611149|ref|YP_970827.1|	-	393	3.7e-09	24.2	8	3	3	0.085	0.25	-1.5	0	228	253	235	265	199	265	0.63
YP_971221.1	acetyl-CoA acetyltransferase [Acidovorax citrulli AAC00-1]	acetyl-CoA acetyltransferase	Acidovorax citrulli AAC00-1	ketoacyl-synt	PF00109.22	Beta-ketoacyl_synthase_N-terminal_domain	253	gi|120611543|ref|YP_971221.1|	-	391	2e-10	28.4	3.4	1	2	2.1e-10	6.4e-10	26.7	2.5	151	214	64	129	19	143	0.79
YP_971221.1	acetyl-CoA acetyltransferase [Acidovorax citrulli AAC00-1]	acetyl-CoA acetyltransferase	Acidovorax citrulli AAC00-1	ketoacyl-synt	PF00109.22	Beta-ketoacyl_synthase_N-terminal_domain	253	gi|120611543|ref|YP_971221.1|	-	391	2e-10	28.4	3.4	2	2	0.14	0.43	-2.2	0	19	73	142	189	137	202	0.53
YP_972050.1	amino acid adenylation domain-containing protein [Acidovorax citrulli AAC00-1]	amino acid adenylation domain-containing protein	Acidovorax citrulli AAC00-1	Condensation	PF00668.16	Condensation_domain	301	gi|120612372|ref|YP_972050.1|	-	1368	1.5e-52	166.2	0	1	1	6.4e-53	1.9e-52	165.8	0	3	300	46	348	44	349	0.95
YP_972051.1	amino acid adenylation domain-containing protein [Acidovorax citrulli AAC00-1]	amino acid adenylation domain-containing protein	Acidovorax citrulli AAC00-1	Condensation	PF00668.16	Condensation_domain	301	gi|120612373|ref|YP_972051.1|	-	2651	5.4e-190	617.5	0	1	3	1.5e-76	4.5e-76	243.4	0	2	300	44	347	43	348	0.96
YP_972051.1	amino acid adenylation domain-containing protein [Acidovorax citrulli AAC00-1]	amino acid adenylation domain-containing protein	Acidovorax citrulli AAC00-1	Condensation	PF00668.16	Condensation_domain	301	gi|120612373|ref|YP_972051.1|	-	2651	5.4e-190	617.5	0	2	3	2.2e-58	6.7e-58	183.7	0	2	299	1111	1412	1110	1414	0.95
YP_972051.1	amino acid adenylation domain-containing protein [Acidovorax citrulli AAC00-1]	amino acid adenylation domain-containing protein	Acidovorax citrulli AAC00-1	Condensation	PF00668.16	Condensation_domain	301	gi|120612373|ref|YP_972051.1|	-	2651	5.4e-190	617.5	0	3	3	2.5e-59	7.5e-59	186.9	0	2	299	1579	1878	1578	1880	0.9
YP_972052.1	amino acid adenylation domain-containing protein [Acidovorax citrulli AAC00-1]	amino acid adenylation domain-containing protein	Acidovorax citrulli AAC00-1	Condensation	PF00668.16	Condensation_domain	301	gi|120612374|ref|YP_972052.1|	-	1130	2.4e-61	195.1	0	1	1	1.2e-61	3.6e-61	194.5	0	4	300	60	365	58	366	0.93
YP_972053.1	beta-ketoacyl synthase [Acidovorax citrulli AAC00-1]	beta-ketoacyl synthase	Acidovorax citrulli AAC00-1	ketoacyl-synt	PF00109.22	Beta-ketoacyl_synthase_N-terminal_domain	253	gi|120612375|ref|YP_972053.1|	-	1535	1.3e-74	238.7	0.1	1	1	1.6e-74	2.4e-74	237.8	0.1	3	253	15	267	14	267	0.91
YP_972053.1	beta-ketoacyl synthase [Acidovorax citrulli AAC00-1]	beta-ketoacyl synthase	Acidovorax citrulli AAC00-1	Ketoacyl-synt_C	PF02801.18	Beta-ketoacyl_synthase_C-terminal_domain	118	gi|120612375|ref|YP_972053.1|	-	1535	1.5e-44	138.6	2.7	1	1	2.2e-44	3.4e-44	137.5	2.7	1	117	275	393	275	394	0.98
YP_972054.1	amino acid adenylation domain-containing protein [Acidovorax citrulli AAC00-1]	amino acid adenylation domain-containing protein	Acidovorax citrulli AAC00-1	Condensation	PF00668.16	Condensation_domain	301	gi|120612376|ref|YP_972054.1|	-	1779	5.4e-58	184.1	0	1	1	2.5e-58	7.6e-58	183.6	0	5	296	702	997	698	1001	0.94
YP_972261.1	beta-ketoadipyl CoA thiolase [Acidovorax citrulli AAC00-1]	beta-ketoadipyl CoA thiolase	Acidovorax citrulli AAC00-1	ketoacyl-synt	PF00109.22	Beta-ketoacyl_synthase_N-terminal_domain	253	gi|120612583|ref|YP_972261.1|	-	402	5.6e-09	23.6	0.2	1	1	5.6e-09	1.7e-08	22	0.2	175	208	92	124	81	144	0.81
YP_972400.1	acetyl-CoA acetyltransferase [Acidovorax citrulli AAC00-1]	acetyl-CoA acetyltransferase	Acidovorax citrulli AAC00-1	ketoacyl-synt	PF00109.22	Beta-ketoacyl_synthase_N-terminal_domain	253	gi|120612722|ref|YP_972400.1|	-	399	1.1e-10	29.2	1.7	1	1	9.7e-11	2.9e-10	27.8	1.3	170	206	90	126	87	140	0.88
YP_972495.1	3-oxoacyl-ACP synthase [Acidovorax citrulli AAC00-1]	3-oxoacyl-ACP synthase	Acidovorax citrulli AAC00-1	ketoacyl-synt	PF00109.22	Beta-ketoacyl_synthase_N-terminal_domain	253	gi|120612817|ref|YP_972495.1|	-	408	2.3e-48	152.6	3.4	1	1	2.2e-48	3.4e-48	152.1	3.4	2	253	5	247	4	247	0.91
YP_972495.1	3-oxoacyl-ACP synthase [Acidovorax citrulli AAC00-1]	3-oxoacyl-ACP synthase	Acidovorax citrulli AAC00-1	Ketoacyl-synt_C	PF02801.18	Beta-ketoacyl_synthase_C-terminal_domain	118	gi|120612817|ref|YP_972495.1|	-	408	1.6e-29	90.1	0.7	1	3	0.037	0.055	1.3	0	27	45	79	97	63	114	0.84
YP_972495.1	3-oxoacyl-ACP synthase [Acidovorax citrulli AAC00-1]	3-oxoacyl-ACP synthase	Acidovorax citrulli AAC00-1	Ketoacyl-synt_C	PF02801.18	Beta-ketoacyl_synthase_C-terminal_domain	118	gi|120612817|ref|YP_972495.1|	-	408	1.6e-29	90.1	0.7	2	3	0.41	0.62	-2.1	0.1	78	95	158	175	147	185	0.82
YP_972495.1	3-oxoacyl-ACP synthase [Acidovorax citrulli AAC00-1]	3-oxoacyl-ACP synthase	Acidovorax citrulli AAC00-1	Ketoacyl-synt_C	PF02801.18	Beta-ketoacyl_synthase_C-terminal_domain	118	gi|120612817|ref|YP_972495.1|	-	408	1.6e-29	90.1	0.7	3	3	1.8e-28	2.8e-28	86.1	0	2	117	256	362	255	363	0.94
YP_972967.1	amino acid adenylation domain-containing protein [Acidovorax citrulli AAC00-1]	amino acid adenylation domain-containing protein	Acidovorax citrulli AAC00-1	Condensation	PF00668.16	Condensation_domain	301	gi|120613289|ref|YP_972967.1|	-	1449	1e-48	153.6	0	1	1	5.2e-49	1.6e-48	153	0	3	300	9	304	8	305	0.94
YP_002551521.1	beta-ketothiolase [Acidovorax ebreus TPSY]	beta-ketothiolase	Acidovorax ebreus TPSY	ketoacyl-synt	PF00109.22	Beta-ketoacyl_synthase_N-terminal_domain	253	gi|222109257|ref|YP_002551521.1|	-	395	3.1e-09	24.4	5.5	1	3	0.00054	0.0016	5.7	0	87	124	27	64	17	78	0.84
YP_002551521.1	beta-ketothiolase [Acidovorax ebreus TPSY]	beta-ketothiolase	Acidovorax ebreus TPSY	ketoacyl-synt	PF00109.22	Beta-ketoacyl_synthase_N-terminal_domain	253	gi|222109257|ref|YP_002551521.1|	-	395	3.1e-09	24.4	5.5	2	3	2.9e-08	8.8e-08	19.7	0.9	166	206	82	122	71	143	0.84
YP_002551521.1	beta-ketothiolase [Acidovorax ebreus TPSY]	beta-ketothiolase	Acidovorax ebreus TPSY	ketoacyl-synt	PF00109.22	Beta-ketoacyl_synthase_N-terminal_domain	253	gi|222109257|ref|YP_002551521.1|	-	395	3.1e-09	24.4	5.5	3	3	0.092	0.28	-1.6	0.1	103	173	333	379	298	391	0.56
YP_002551608.1	acetyl-CoA acetyltransferase [Acidovorax ebreus TPSY]	acetyl-CoA acetyltransferase	Acidovorax ebreus TPSY	ketoacyl-synt	PF00109.22	Beta-ketoacyl_synthase_N-terminal_domain	253	gi|222109344|ref|YP_002551608.1|	-	392	1.4e-10	28.9	1.9	1	1	1.6e-10	4.9e-10	27.1	1.9	154	206	67	122	53	154	0.84
YP_002551627.1	acetyl-CoA acetyltransferase [Acidovorax ebreus TPSY]	acetyl-CoA acetyltransferase	Acidovorax ebreus TPSY	ketoacyl-synt	PF00109.22	Beta-ketoacyl_synthase_N-terminal_domain	253	gi|222109363|ref|YP_002551627.1|	-	402	9.3e-09	22.9	0.1	1	2	0.024	0.072	0.3	0	87	112	25	50	9	62	0.85
YP_002551627.1	acetyl-CoA acetyltransferase [Acidovorax ebreus TPSY]	acetyl-CoA acetyltransferase	Acidovorax ebreus TPSY	ketoacyl-synt	PF00109.22	Beta-ketoacyl_synthase_N-terminal_domain	253	gi|222109363|ref|YP_002551627.1|	-	402	9.3e-09	22.9	0.1	2	2	3.3e-08	1e-07	19.5	0.1	172	232	85	143	77	151	0.72
YP_002552022.1	beta-ketoacyl synthase [Acidovorax ebreus TPSY]	beta-ketoacyl synthase	Acidovorax ebreus TPSY	ketoacyl-synt	PF00109.22	Beta-ketoacyl_synthase_N-terminal_domain	253	gi|222109758|ref|YP_002552022.1|	-	407	2.5e-49	155.8	4	1	1	2.6e-49	3.9e-49	155.2	4	2	253	4	246	3	246	0.92
YP_002552022.1	beta-ketoacyl synthase [Acidovorax ebreus TPSY]	beta-ketoacyl synthase	Acidovorax ebreus TPSY	Ketoacyl-synt_C	PF02801.18	Beta-ketoacyl_synthase_C-terminal_domain	118	gi|222109758|ref|YP_002552022.1|	-	407	2e-30	93.1	4.1	1	3	0.0023	0.0034	5.2	0	24	46	75	97	59	118	0.82
YP_002552022.1	beta-ketoacyl synthase [Acidovorax ebreus TPSY]	beta-ketoacyl synthase	Acidovorax ebreus TPSY	Ketoacyl-synt_C	PF02801.18	Beta-ketoacyl_synthase_C-terminal_domain	118	gi|222109758|ref|YP_002552022.1|	-	407	2e-30	93.1	4.1	2	3	0.4	0.61	-2.1	0.1	78	95	157	174	144	179	0.8
YP_002552022.1	beta-ketoacyl synthase [Acidovorax ebreus TPSY]	beta-ketoacyl synthase	Acidovorax ebreus TPSY	Ketoacyl-synt_C	PF02801.18	Beta-ketoacyl_synthase_C-terminal_domain	118	gi|222109758|ref|YP_002552022.1|	-	407	2e-30	93.1	4.1	3	3	3.3e-29	5e-29	88.5	0.2	1	117	254	361	254	362	0.95
YP_002552054.1	acetyl-CoA acetyltransferase [Acidovorax ebreus TPSY]	acetyl-CoA acetyltransferase	Acidovorax ebreus TPSY	ketoacyl-synt	PF00109.22	Beta-ketoacyl_synthase_N-terminal_domain	253	gi|222109790|ref|YP_002552054.1|	-	398	6.8e-11	29.9	0.5	1	1	5.2e-11	1.6e-10	28.7	0.5	170	206	89	125	86	185	0.9
YP_002553003.1	acetyl-CoA acetyltransferase [Acidovorax ebreus TPSY]	acetyl-CoA acetyltransferase	Acidovorax ebreus TPSY	ketoacyl-synt	PF00109.22	Beta-ketoacyl_synthase_N-terminal_domain	253	gi|222110739|ref|YP_002553003.1|	-	389	1.2e-09	25.7	7.7	1	2	0.0036	0.011	3	0.1	95	124	33	62	22	77	0.84
YP_002553003.1	acetyl-CoA acetyltransferase [Acidovorax ebreus TPSY]	acetyl-CoA acetyltransferase	Acidovorax ebreus TPSY	ketoacyl-synt	PF00109.22	Beta-ketoacyl_synthase_N-terminal_domain	253	gi|222110739|ref|YP_002553003.1|	-	389	1.2e-09	25.7	7.7	2	2	1.8e-09	5.4e-09	23.6	4.1	167	204	78	115	76	123	0.95
YP_002553140.1	acetyl-CoA acetyltransferase [Acidovorax ebreus TPSY]	acetyl-CoA acetyltransferase	Acidovorax ebreus TPSY	ketoacyl-synt	PF00109.22	Beta-ketoacyl_synthase_N-terminal_domain	253	gi|222110876|ref|YP_002553140.1|	-	392	3.2e-09	24.4	9	1	3	0.0014	0.0042	4.4	0	87	132	25	70	19	79	0.81
YP_002553140.1	acetyl-CoA acetyltransferase [Acidovorax ebreus TPSY]	acetyl-CoA acetyltransferase	Acidovorax ebreus TPSY	ketoacyl-synt	PF00109.22	Beta-ketoacyl_synthase_N-terminal_domain	253	gi|222110876|ref|YP_002553140.1|	-	392	3.2e-09	24.4	9	2	3	2.6e-09	7.8e-09	23.1	2.2	167	206	80	119	75	132	0.89
YP_002553140.1	acetyl-CoA acetyltransferase [Acidovorax ebreus TPSY]	acetyl-CoA acetyltransferase	Acidovorax ebreus TPSY	ketoacyl-synt	PF00109.22	Beta-ketoacyl_synthase_N-terminal_domain	253	gi|222110876|ref|YP_002553140.1|	-	392	3.2e-09	24.4	9	3	3	0.092	0.28	-1.6	0.1	152	251	241	263	169	269	0.63
YP_002553191.1	beta-ketothiolase [Acidovorax ebreus TPSY]	beta-ketothiolase	Acidovorax ebreus TPSY	ketoacyl-synt	PF00109.22	Beta-ketoacyl_synthase_N-terminal_domain	253	gi|222110927|ref|YP_002553191.1|	-	394	6.1e-09	23.5	0.6	1	2	9.5e-09	2.8e-08	21.3	0.4	167	208	82	123	61	138	0.84
YP_002553191.1	beta-ketothiolase [Acidovorax ebreus TPSY]	beta-ketothiolase	Acidovorax ebreus TPSY	ketoacyl-synt	PF00109.22	Beta-ketoacyl_synthase_N-terminal_domain	253	gi|222110927|ref|YP_002553191.1|	-	394	6.1e-09	23.5	0.6	2	2	0.11	0.32	-1.8	0	100	133	329	362	315	382	0.72
YP_002553475.1	acetyl-CoA acetyltransferase [Acidovorax ebreus TPSY]	acetyl-CoA acetyltransferase	Acidovorax ebreus TPSY	ketoacyl-synt	PF00109.22	Beta-ketoacyl_synthase_N-terminal_domain	253	gi|222111211|ref|YP_002553475.1|	-	391	5.2e-09	23.7	2.2	1	2	0.0061	0.018	2.2	0	89	122	28	57	16	88	0.78
YP_002553475.1	acetyl-CoA acetyltransferase [Acidovorax ebreus TPSY]	acetyl-CoA acetyltransferase	Acidovorax ebreus TPSY	ketoacyl-synt	PF00109.22	Beta-ketoacyl_synthase_N-terminal_domain	253	gi|222111211|ref|YP_002553475.1|	-	391	5.2e-09	23.7	2.2	2	2	1.9e-08	5.8e-08	20.3	0.7	169	215	84	130	58	145	0.81
YP_002554064.1	3-oxoacyl-ACP synthase II [Acidovorax ebreus TPSY]	3-oxoacyl-ACP synthase II	Acidovorax ebreus TPSY	ketoacyl-synt	PF00109.22	Beta-ketoacyl_synthase_N-terminal_domain	253	gi|222111800|ref|YP_002554064.1|	-	414	5.7e-67	213.6	1.3	1	2	4.1e-67	6.1e-67	213.5	0.3	2	253	4	251	3	251	0.92
YP_002554064.1	3-oxoacyl-ACP synthase II [Acidovorax ebreus TPSY]	3-oxoacyl-ACP synthase II	Acidovorax ebreus TPSY	ketoacyl-synt	PF00109.22	Beta-ketoacyl_synthase_N-terminal_domain	253	gi|222111800|ref|YP_002554064.1|	-	414	5.7e-67	213.6	1.3	2	2	0.32	0.49	-2.4	0	95	114	285	304	284	344	0.64
YP_002554064.1	3-oxoacyl-ACP synthase II [Acidovorax ebreus TPSY]	3-oxoacyl-ACP synthase II	Acidovorax ebreus TPSY	Ketoacyl-synt_C	PF02801.18	Beta-ketoacyl_synthase_C-terminal_domain	118	gi|222111800|ref|YP_002554064.1|	-	414	8.5e-40	123.3	0.6	1	1	9.8e-40	1.5e-39	122.5	0.6	1	117	259	371	259	372	0.95
YP_002554068.1	3-oxoacyl-(acyl carrier protein) synthase iii [Acidovorax ebreus TPSY]	3-oxoacyl-(acyl carrier protein) synthase iii	Acidovorax ebreus TPSY	ketoacyl-synt	PF00109.22	Beta-ketoacyl_synthase_N-terminal_domain	253	gi|222111804|ref|YP_002554068.1|	-	325	8.1e-06	13.2	9.7	1	3	0.0013	0.0038	4.5	0.1	88	111	58	81	15	89	0.85
YP_002554068.1	3-oxoacyl-(acyl carrier protein) synthase iii [Acidovorax ebreus TPSY]	3-oxoacyl-(acyl carrier protein) synthase iii	Acidovorax ebreus TPSY	ketoacyl-synt	PF00109.22	Beta-ketoacyl_synthase_N-terminal_domain	253	gi|222111804|ref|YP_002554068.1|	-	325	8.1e-06	13.2	9.7	2	3	1.3e-05	4e-05	11	0.9	154	204	97	148	84	158	0.86
YP_002554068.1	3-oxoacyl-(acyl carrier protein) synthase iii [Acidovorax ebreus TPSY]	3-oxoacyl-(acyl carrier protein) synthase iii	Acidovorax ebreus TPSY	ketoacyl-synt	PF00109.22	Beta-ketoacyl_synthase_N-terminal_domain	253	gi|222111804|ref|YP_002554068.1|	-	325	8.1e-06	13.2	9.7	3	3	0.0051	0.015	2.5	0.2	236	250	162	176	151	178	0.81
YP_002554305.1	beta-ketoadipyl CoA thiolase [Acidovorax ebreus TPSY]	beta-ketoadipyl CoA thiolase	Acidovorax ebreus TPSY	ketoacyl-synt	PF00109.22	Beta-ketoacyl_synthase_N-terminal_domain	253	gi|222112041|ref|YP_002554305.1|	-	403	2.8e-09	24.6	0.1	1	1	2.3e-09	7e-09	23.3	0.1	174	209	92	126	80	144	0.81
YP_002554452.1	acetyl-CoA acetyltransferase [Acidovorax ebreus TPSY]	acetyl-CoA acetyltransferase	Acidovorax ebreus TPSY	ketoacyl-synt	PF00109.22	Beta-ketoacyl_synthase_N-terminal_domain	253	gi|222112188|ref|YP_002554452.1|	-	399	4.8e-08	20.5	0.3	1	1	6.3e-08	1.9e-07	18.6	0.3	175	205	90	120	84	136	0.86
YP_002554751.1	thiolase [Acidovorax ebreus TPSY]	thiolase	Acidovorax ebreus TPSY	Ketoacyl-synt_C	PF02801.18	Beta-ketoacyl_synthase_C-terminal_domain	118	gi|222112487|ref|YP_002554751.1|	-	383	4.3e-06	14.6	3.9	1	4	0.012	0.037	1.9	0	13	48	18	51	7	58	0.68
YP_002554751.1	thiolase [Acidovorax ebreus TPSY]	thiolase	Acidovorax ebreus TPSY	Ketoacyl-synt_C	PF02801.18	Beta-ketoacyl_synthase_C-terminal_domain	118	gi|222112487|ref|YP_002554751.1|	-	383	4.3e-06	14.6	3.9	2	4	0.023	0.07	1	0	49	75	156	182	155	197	0.83
YP_002554751.1	thiolase [Acidovorax ebreus TPSY]	thiolase	Acidovorax ebreus TPSY	Ketoacyl-synt_C	PF02801.18	Beta-ketoacyl_synthase_C-terminal_domain	118	gi|222112487|ref|YP_002554751.1|	-	383	4.3e-06	14.6	3.9	3	4	9.5e-05	0.00028	8.7	0	8	47	237	277	229	283	0.69
YP_002554751.1	thiolase [Acidovorax ebreus TPSY]	thiolase	Acidovorax ebreus TPSY	Ketoacyl-synt_C	PF02801.18	Beta-ketoacyl_synthase_C-terminal_domain	118	gi|222112487|ref|YP_002554751.1|	-	383	4.3e-06	14.6	3.9	4	4	0.041	0.12	0.2	0.2	87	107	328	348	327	356	0.86
YP_984346.1	beta-ketothiolase [Acidovorax sp. JS42]	beta-ketothiolase	Acidovorax sp. JS42	ketoacyl-synt	PF00109.22	Beta-ketoacyl_synthase_N-terminal_domain	253	gi|121592450|ref|YP_984346.1|	-	395	3.1e-09	24.4	5.5	1	3	0.00054	0.0016	5.7	0	87	124	27	64	17	77	0.84
YP_984346.1	beta-ketothiolase [Acidovorax sp. JS42]	beta-ketothiolase	Acidovorax sp. JS42	ketoacyl-synt	PF00109.22	Beta-ketoacyl_synthase_N-terminal_domain	253	gi|121592450|ref|YP_984346.1|	-	395	3.1e-09	24.4	5.5	2	3	2.2e-08	6.6e-08	20.1	0.8	166	206	82	122	69	144	0.81
YP_984346.1	beta-ketothiolase [Acidovorax sp. JS42]	beta-ketothiolase	Acidovorax sp. JS42	ketoacyl-synt	PF00109.22	Beta-ketoacyl_synthase_N-terminal_domain	253	gi|121592450|ref|YP_984346.1|	-	395	3.1e-09	24.4	5.5	3	3	0.11	0.32	-1.8	0.1	140	175	346	381	298	392	0.59
YP_984436.1	acetyl-CoA acetyltransferase [Acidovorax sp. JS42]	acetyl-CoA acetyltransferase	Acidovorax sp. JS42	ketoacyl-synt	PF00109.22	Beta-ketoacyl_synthase_N-terminal_domain	253	gi|121592540|ref|YP_984436.1|	-	392	6.2e-11	30	0.7	1	1	6.7e-11	2e-10	28.3	0.7	153	206	66	122	40	145	0.86
YP_984455.1	acetyl-CoA acetyltransferase [Acidovorax sp. JS42]	acetyl-CoA acetyltransferase	Acidovorax sp. JS42	ketoacyl-synt	PF00109.22	Beta-ketoacyl_synthase_N-terminal_domain	253	gi|121592559|ref|YP_984455.1|	-	402	9.1e-09	22.9	0.1	1	2	0.024	0.072	0.3	0	87	112	25	50	9	62	0.85
YP_984455.1	acetyl-CoA acetyltransferase [Acidovorax sp. JS42]	acetyl-CoA acetyltransferase	Acidovorax sp. JS42	ketoacyl-synt	PF00109.22	Beta-ketoacyl_synthase_N-terminal_domain	253	gi|121592559|ref|YP_984455.1|	-	402	9.1e-09	22.9	0.1	2	2	3.3e-08	1e-07	19.5	0.1	172	232	85	143	77	151	0.72
YP_984852.1	beta-ketoacyl synthase [Acidovorax sp. JS42]	beta-ketoacyl synthase	Acidovorax sp. JS42	ketoacyl-synt	PF00109.22	Beta-ketoacyl_synthase_N-terminal_domain	253	gi|121592956|ref|YP_984852.1|	-	407	2.5e-49	155.8	4	1	1	2.6e-49	3.9e-49	155.2	4	2	253	4	246	3	246	0.92
YP_984852.1	beta-ketoacyl synthase [Acidovorax sp. JS42]	beta-ketoacyl synthase	Acidovorax sp. JS42	Ketoacyl-synt_C	PF02801.18	Beta-ketoacyl_synthase_C-terminal_domain	118	gi|121592956|ref|YP_984852.1|	-	407	2e-30	93.1	4.1	1	3	0.0023	0.0034	5.2	0	24	46	75	97	59	118	0.82
YP_984852.1	beta-ketoacyl synthase [Acidovorax sp. JS42]	beta-ketoacyl synthase	Acidovorax sp. JS42	Ketoacyl-synt_C	PF02801.18	Beta-ketoacyl_synthase_C-terminal_domain	118	gi|121592956|ref|YP_984852.1|	-	407	2e-30	93.1	4.1	2	3	0.4	0.61	-2.1	0.1	78	95	157	174	144	179	0.8
YP_984852.1	beta-ketoacyl synthase [Acidovorax sp. JS42]	beta-ketoacyl synthase	Acidovorax sp. JS42	Ketoacyl-synt_C	PF02801.18	Beta-ketoacyl_synthase_C-terminal_domain	118	gi|121592956|ref|YP_984852.1|	-	407	2e-30	93.1	4.1	3	3	3.3e-29	5e-29	88.5	0.2	1	117	254	361	254	362	0.95
YP_984918.1	acetyl-CoA acetyltransferase [Acidovorax sp. JS42]	acetyl-CoA acetyltransferase	Acidovorax sp. JS42	ketoacyl-synt	PF00109.22	Beta-ketoacyl_synthase_N-terminal_domain	253	gi|121593022|ref|YP_984918.1|	-	398	6.5e-11	29.9	0.5	1	1	5.2e-11	1.6e-10	28.7	0.5	170	206	89	125	86	185	0.9
YP_985952.1	acetyl-CoA acetyltransferase [Acidovorax sp. JS42]	acetyl-CoA acetyltransferase	Acidovorax sp. JS42	ketoacyl-synt	PF00109.22	Beta-ketoacyl_synthase_N-terminal_domain	253	gi|121594056|ref|YP_985952.1|	-	391	5.2e-09	23.7	2.2	1	2	0.0061	0.018	2.2	0	89	122	28	57	16	88	0.78
YP_985952.1	acetyl-CoA acetyltransferase [Acidovorax sp. JS42]	acetyl-CoA acetyltransferase	Acidovorax sp. JS42	ketoacyl-synt	PF00109.22	Beta-ketoacyl_synthase_N-terminal_domain	253	gi|121594056|ref|YP_985952.1|	-	391	5.2e-09	23.7	2.2	2	2	1.9e-08	5.8e-08	20.3	0.7	169	215	84	130	58	145	0.81
YP_986187.1	beta-ketothiolase [Acidovorax sp. JS42]	beta-ketothiolase	Acidovorax sp. JS42	ketoacyl-synt	PF00109.22	Beta-ketoacyl_synthase_N-terminal_domain	253	gi|121594291|ref|YP_986187.1|	-	394	6.1e-09	23.5	0.6	1	2	9.5e-09	2.8e-08	21.3	0.4	167	208	82	123	61	138	0.84
YP_986187.1	beta-ketothiolase [Acidovorax sp. JS42]	beta-ketothiolase	Acidovorax sp. JS42	ketoacyl-synt	PF00109.22	Beta-ketoacyl_synthase_N-terminal_domain	253	gi|121594291|ref|YP_986187.1|	-	394	6.1e-09	23.5	0.6	2	2	0.11	0.32	-1.8	0	100	133	329	362	315	382	0.72
YP_986325.1	acetyl-CoA acetyltransferase [Acidovorax sp. JS42]	acetyl-CoA acetyltransferase	Acidovorax sp. JS42	ketoacyl-synt	PF00109.22	Beta-ketoacyl_synthase_N-terminal_domain	253	gi|121594429|ref|YP_986325.1|	-	392	3.4e-09	24.3	9	1	3	0.0014	0.0042	4.4	0	87	132	25	70	19	79	0.81
YP_986325.1	acetyl-CoA acetyltransferase [Acidovorax sp. JS42]	acetyl-CoA acetyltransferase	Acidovorax sp. JS42	ketoacyl-synt	PF00109.22	Beta-ketoacyl_synthase_N-terminal_domain	253	gi|121594429|ref|YP_986325.1|	-	392	3.4e-09	24.3	9	2	3	2.6e-09	7.8e-09	23.1	2.2	167	206	80	119	75	132	0.89
YP_986325.1	acetyl-CoA acetyltransferase [Acidovorax sp. JS42]	acetyl-CoA acetyltransferase	Acidovorax sp. JS42	ketoacyl-synt	PF00109.22	Beta-ketoacyl_synthase_N-terminal_domain	253	gi|121594429|ref|YP_986325.1|	-	392	3.4e-09	24.3	9	3	3	0.092	0.28	-1.6	0.1	152	251	241	263	169	269	0.63
YP_986555.1	acetyl-CoA acetyltransferase [Acidovorax sp. JS42]	acetyl-CoA acetyltransferase	Acidovorax sp. JS42	ketoacyl-synt	PF00109.22	Beta-ketoacyl_synthase_N-terminal_domain	253	gi|121594659|ref|YP_986555.1|	-	389	5.5e-11	30.2	3.3	1	2	0.0036	0.011	3	0	95	124	33	62	14	74	0.82
YP_986555.1	acetyl-CoA acetyltransferase [Acidovorax sp. JS42]	acetyl-CoA acetyltransferase	Acidovorax sp. JS42	ketoacyl-synt	PF00109.22	Beta-ketoacyl_synthase_N-terminal_domain	253	gi|121594659|ref|YP_986555.1|	-	389	5.5e-11	30.2	3.3	2	2	2e-10	5.9e-10	26.8	1	167	204	78	115	75	124	0.95
YP_986679.1	beta-ketoacyl synthase [Acidovorax sp. JS42]	beta-ketoacyl synthase	Acidovorax sp. JS42	ketoacyl-synt	PF00109.22	Beta-ketoacyl_synthase_N-terminal_domain	253	gi|121594783|ref|YP_986679.1|	-	442	3e-55	175.2	3.9	1	1	3.4e-55	5.1e-55	174.4	3.9	2	253	3	256	2	256	0.88
YP_986679.1	beta-ketoacyl synthase [Acidovorax sp. JS42]	beta-ketoacyl synthase	Acidovorax sp. JS42	Ketoacyl-synt_C	PF02801.18	Beta-ketoacyl_synthase_C-terminal_domain	118	gi|121594783|ref|YP_986679.1|	-	442	2.1e-34	105.9	1.9	1	2	0.71	1.1	-2.9	0	13	30	92	110	85	115	0.73
YP_986679.1	beta-ketoacyl synthase [Acidovorax sp. JS42]	beta-ketoacyl synthase	Acidovorax sp. JS42	Ketoacyl-synt_C	PF02801.18	Beta-ketoacyl_synthase_C-terminal_domain	118	gi|121594783|ref|YP_986679.1|	-	442	2.1e-34	105.9	1.9	2	2	1.4e-34	2.1e-34	105.8	0.5	1	117	264	377	264	378	0.97
YP_987475.1	3-oxoacyl-[acyl-carrier-protein] synthase II [Acidovorax sp. JS42]	3-oxoacyl-acyl-carrier-protein synthase II	Acidovorax sp. JS42	ketoacyl-synt	PF00109.22	Beta-ketoacyl_synthase_N-terminal_domain	253	gi|121595579|ref|YP_987475.1|	-	414	2.1e-67	215	1	1	2	1.7e-67	2.5e-67	214.7	0.2	2	253	4	251	3	251	0.92
YP_987475.1	3-oxoacyl-[acyl-carrier-protein] synthase II [Acidovorax sp. JS42]	3-oxoacyl-acyl-carrier-protein synthase II	Acidovorax sp. JS42	ketoacyl-synt	PF00109.22	Beta-ketoacyl_synthase_N-terminal_domain	253	gi|121595579|ref|YP_987475.1|	-	414	2.1e-67	215	1	2	2	0.32	0.49	-2.4	0	95	114	285	304	284	344	0.64
YP_987475.1	3-oxoacyl-[acyl-carrier-protein] synthase II [Acidovorax sp. JS42]	3-oxoacyl-acyl-carrier-protein synthase II	Acidovorax sp. JS42	Ketoacyl-synt_C	PF02801.18	Beta-ketoacyl_synthase_C-terminal_domain	118	gi|121595579|ref|YP_987475.1|	-	414	7.9e-40	123.4	0.6	1	1	9.8e-40	1.5e-39	122.5	0.6	1	117	259	371	259	372	0.95
YP_987479.1	3-oxoacyl-(acyl carrier protein) synthase III [Acidovorax sp. JS42]	3-oxoacyl-(acyl carrier protein) synthase III	Acidovorax sp. JS42	ketoacyl-synt	PF00109.22	Beta-ketoacyl_synthase_N-terminal_domain	253	gi|121595583|ref|YP_987479.1|	-	325	8.1e-06	13.2	9.7	1	3	0.0013	0.0038	4.5	0.1	88	111	58	81	15	89	0.85
YP_987479.1	3-oxoacyl-(acyl carrier protein) synthase III [Acidovorax sp. JS42]	3-oxoacyl-(acyl carrier protein) synthase III	Acidovorax sp. JS42	ketoacyl-synt	PF00109.22	Beta-ketoacyl_synthase_N-terminal_domain	253	gi|121595583|ref|YP_987479.1|	-	325	8.1e-06	13.2	9.7	2	3	1.3e-05	4e-05	11	0.9	154	204	97	148	84	158	0.86
YP_987479.1	3-oxoacyl-(acyl carrier protein) synthase III [Acidovorax sp. JS42]	3-oxoacyl-(acyl carrier protein) synthase III	Acidovorax sp. JS42	ketoacyl-synt	PF00109.22	Beta-ketoacyl_synthase_N-terminal_domain	253	gi|121595583|ref|YP_987479.1|	-	325	8.1e-06	13.2	9.7	3	3	0.0051	0.015	2.5	0.2	236	250	162	176	151	178	0.81
YP_987737.1	beta-ketoadipyl CoA thiolase [Acidovorax sp. JS42]	beta-ketoadipyl CoA thiolase	Acidovorax sp. JS42	ketoacyl-synt	PF00109.22	Beta-ketoacyl_synthase_N-terminal_domain	253	gi|121595841|ref|YP_987737.1|	-	403	2.8e-09	24.6	0.1	1	1	2.3e-09	7e-09	23.3	0.1	174	209	92	126	80	144	0.81
YP_987923.1	acetyl-CoA acetyltransferase [Acidovorax sp. JS42]	acetyl-CoA acetyltransferase	Acidovorax sp. JS42	ketoacyl-synt	PF00109.22	Beta-ketoacyl_synthase_N-terminal_domain	253	gi|121596027|ref|YP_987923.1|	-	399	4.8e-08	20.5	0.3	1	1	6.3e-08	1.9e-07	18.6	0.3	175	205	90	120	84	136	0.86
YP_988154.1	thiolase [Acidovorax sp. JS42]	thiolase	Acidovorax sp. JS42	Ketoacyl-synt_C	PF02801.18	Beta-ketoacyl_synthase_C-terminal_domain	118	gi|121596258|ref|YP_988154.1|	-	383	3.2e-06	15	3.8	1	4	0.012	0.037	1.9	0	13	48	18	51	7	58	0.68
YP_988154.1	thiolase [Acidovorax sp. JS42]	thiolase	Acidovorax sp. JS42	Ketoacyl-synt_C	PF02801.18	Beta-ketoacyl_synthase_C-terminal_domain	118	gi|121596258|ref|YP_988154.1|	-	383	3.2e-06	15	3.8	2	4	0.026	0.078	0.8	0	49	74	156	181	155	196	0.83
YP_988154.1	thiolase [Acidovorax sp. JS42]	thiolase	Acidovorax sp. JS42	Ketoacyl-synt_C	PF02801.18	Beta-ketoacyl_synthase_C-terminal_domain	118	gi|121596258|ref|YP_988154.1|	-	383	3.2e-06	15	3.8	3	4	7.1e-05	0.00021	9.1	0	8	47	237	277	229	283	0.69
YP_988154.1	thiolase [Acidovorax sp. JS42]	thiolase	Acidovorax sp. JS42	Ketoacyl-synt_C	PF02801.18	Beta-ketoacyl_synthase_C-terminal_domain	118	gi|121596258|ref|YP_988154.1|	-	383	3.2e-06	15	3.8	4	4	0.041	0.12	0.2	0.2	87	107	328	348	327	356	0.86
YP_006852862.1	diacylglycerol O-acyltransferase [Acidovorax sp. KKS102]	diacylglycerol O-acyltransferase	Acidovorax sp. KKS102	Condensation	PF00668.16	Condensation_domain	301	gi|407937221|ref|YP_006852862.1|	-	544	2.4e-07	17.8	0	1	2	2.7e-07	8e-07	16	0	20	145	78	210	75	228	0.74
YP_006852862.1	diacylglycerol O-acyltransferase [Acidovorax sp. KKS102]	diacylglycerol O-acyltransferase	Acidovorax sp. KKS102	Condensation	PF00668.16	Condensation_domain	301	gi|407937221|ref|YP_006852862.1|	-	544	2.4e-07	17.8	0	2	2	0.058	0.17	-1.5	0	206	258	305	358	295	365	0.7
YP_006852964.1	beta-ketoacyl synthase [Acidovorax sp. KKS102]	beta-ketoacyl synthase	Acidovorax sp. KKS102	ketoacyl-synt	PF00109.22	Beta-ketoacyl_synthase_N-terminal_domain	253	gi|407937323|ref|YP_006852964.1|	-	407	6.2e-47	147.9	5	1	2	4.1e-47	6.2e-47	147.9	5	2	253	5	247	4	247	0.91
YP_006852964.1	beta-ketoacyl synthase [Acidovorax sp. KKS102]	beta-ketoacyl synthase	Acidovorax sp. KKS102	ketoacyl-synt	PF00109.22	Beta-ketoacyl_synthase_N-terminal_domain	253	gi|407937323|ref|YP_006852964.1|	-	407	6.2e-47	147.9	5	2	2	0.31	0.47	-2.4	0	138	170	368	399	312	401	0.6
YP_006852964.1	beta-ketoacyl synthase [Acidovorax sp. KKS102]	beta-ketoacyl synthase	Acidovorax sp. KKS102	Ketoacyl-synt_C	PF02801.18	Beta-ketoacyl_synthase_C-terminal_domain	118	gi|407937323|ref|YP_006852964.1|	-	407	3.9e-30	92.1	3.2	1	3	0.0054	0.0081	4	0	24	46	76	98	60	119	0.82
YP_006852964.1	beta-ketoacyl synthase [Acidovorax sp. KKS102]	beta-ketoacyl synthase	Acidovorax sp. KKS102	Ketoacyl-synt_C	PF02801.18	Beta-ketoacyl_synthase_C-terminal_domain	118	gi|407937323|ref|YP_006852964.1|	-	407	3.9e-30	92.1	3.2	2	3	0.29	0.44	-1.6	0.1	78	95	158	175	144	186	0.78
YP_006852964.1	beta-ketoacyl synthase [Acidovorax sp. KKS102]	beta-ketoacyl synthase	Acidovorax sp. KKS102	Ketoacyl-synt_C	PF02801.18	Beta-ketoacyl_synthase_C-terminal_domain	118	gi|407937323|ref|YP_006852964.1|	-	407	3.9e-30	92.1	3.2	3	3	5e-29	7.5e-29	88	0.1	1	117	255	362	255	363	0.95
YP_006853020.1	acetyl-CoA acetyltransferase [Acidovorax sp. KKS102]	acetyl-CoA acetyltransferase	Acidovorax sp. KKS102	ketoacyl-synt	PF00109.22	Beta-ketoacyl_synthase_N-terminal_domain	253	gi|407937379|ref|YP_006853020.1|	-	399	1.1e-10	29.1	0.7	1	1	1e-10	3e-10	27.7	0.7	168	205	88	125	54	132	0.81
YP_006853036.1	acetyl-CoA acetyltransferase [Acidovorax sp. KKS102]	acetyl-CoA acetyltransferase	Acidovorax sp. KKS102	ketoacyl-synt	PF00109.22	Beta-ketoacyl_synthase_N-terminal_domain	253	gi|407937395|ref|YP_006853036.1|	-	401	2e-11	31.6	0.3	1	2	7.4e-11	2.2e-10	28.2	0.1	145	206	60	122	23	176	0.8
YP_006853036.1	acetyl-CoA acetyltransferase [Acidovorax sp. KKS102]	acetyl-CoA acetyltransferase	Acidovorax sp. KKS102	ketoacyl-synt	PF00109.22	Beta-ketoacyl_synthase_N-terminal_domain	253	gi|407937395|ref|YP_006853036.1|	-	401	2e-11	31.6	0.3	2	2	0.011	0.032	1.5	0	95	186	304	398	284	401	0.69
YP_006853147.1	acetyl-CoA acetyltransferase [Acidovorax sp. KKS102]	acetyl-CoA acetyltransferase	Acidovorax sp. KKS102	ketoacyl-synt	PF00109.22	Beta-ketoacyl_synthase_N-terminal_domain	253	gi|407937506|ref|YP_006853147.1|	-	391	3e-06	14.6	2.6	1	1	5.8e-06	1.7e-05	12.1	2.6	174	205	89	120	16	126	0.94
YP_006853785.1	3-oxoacyl-ACP synthase [Acidovorax sp. KKS102]	3-oxoacyl-ACP synthase	Acidovorax sp. KKS102	ketoacyl-synt	PF00109.22	Beta-ketoacyl_synthase_N-terminal_domain	253	gi|407938144|ref|YP_006853785.1|	-	325	3.5e-07	17.7	7.9	1	3	4.8e-07	1.4e-06	15.7	1	93	204	33	148	12	157	0.76
YP_006853785.1	3-oxoacyl-ACP synthase [Acidovorax sp. KKS102]	3-oxoacyl-ACP synthase	Acidovorax sp. KKS102	ketoacyl-synt	PF00109.22	Beta-ketoacyl_synthase_N-terminal_domain	253	gi|407938144|ref|YP_006853785.1|	-	325	3.5e-07	17.7	7.9	2	3	0.0056	0.017	2.4	0.1	236	249	162	175	149	178	0.8
YP_006853785.1	3-oxoacyl-ACP synthase [Acidovorax sp. KKS102]	3-oxoacyl-ACP synthase	Acidovorax sp. KKS102	ketoacyl-synt	PF00109.22	Beta-ketoacyl_synthase_N-terminal_domain	253	gi|407938144|ref|YP_006853785.1|	-	325	3.5e-07	17.7	7.9	3	3	0.0051	0.015	2.5	0	94	127	230	271	210	303	0.67
YP_006853789.1	3-oxoacyl-ACP synthase [Acidovorax sp. KKS102]	3-oxoacyl-ACP synthase	Acidovorax sp. KKS102	ketoacyl-synt	PF00109.22	Beta-ketoacyl_synthase_N-terminal_domain	253	gi|407938148|ref|YP_006853789.1|	-	414	1.8e-64	205.4	1.2	1	1	1.8e-64	2.8e-64	204.8	1.2	2	253	4	251	3	251	0.89
YP_006853789.1	3-oxoacyl-ACP synthase [Acidovorax sp. KKS102]	3-oxoacyl-ACP synthase	Acidovorax sp. KKS102	Ketoacyl-synt_C	PF02801.18	Beta-ketoacyl_synthase_C-terminal_domain	118	gi|407938148|ref|YP_006853789.1|	-	414	1.1e-38	119.7	0.2	1	1	1.3e-38	1.9e-38	118.9	0.2	1	117	259	371	259	372	0.95
YP_006854796.1	acetyl-CoA acetyltransferase [Acidovorax sp. KKS102]	acetyl-CoA acetyltransferase	Acidovorax sp. KKS102	ketoacyl-synt	PF00109.22	Beta-ketoacyl_synthase_N-terminal_domain	253	gi|407939155|ref|YP_006854796.1|	-	392	3e-08	21.2	1.7	1	4	0.00092	0.0028	4.9	0.1	87	136	25	74	20	79	0.84
YP_006854796.1	acetyl-CoA acetyltransferase [Acidovorax sp. KKS102]	acetyl-CoA acetyltransferase	Acidovorax sp. KKS102	ketoacyl-synt	PF00109.22	Beta-ketoacyl_synthase_N-terminal_domain	253	gi|407939155|ref|YP_006854796.1|	-	392	3e-08	21.2	1.7	2	4	1e-08	3e-08	21.2	1.7	167	205	80	118	76	125	0.93
YP_006854796.1	acetyl-CoA acetyltransferase [Acidovorax sp. KKS102]	acetyl-CoA acetyltransferase	Acidovorax sp. KKS102	ketoacyl-synt	PF00109.22	Beta-ketoacyl_synthase_N-terminal_domain	253	gi|407939155|ref|YP_006854796.1|	-	392	3e-08	21.2	1.7	3	4	0.026	0.078	0.2	0.2	115	176	200	265	165	274	0.52
YP_006854796.1	acetyl-CoA acetyltransferase [Acidovorax sp. KKS102]	acetyl-CoA acetyltransferase	Acidovorax sp. KKS102	ketoacyl-synt	PF00109.22	Beta-ketoacyl_synthase_N-terminal_domain	253	gi|407939155|ref|YP_006854796.1|	-	392	3e-08	21.2	1.7	4	4	0.15	0.44	-2.3	0	95	111	296	312	294	346	0.78
YP_006855013.1	acetyl-CoA acetyltransferase [Acidovorax sp. KKS102]	acetyl-CoA acetyltransferase	Acidovorax sp. KKS102	ketoacyl-synt	PF00109.22	Beta-ketoacyl_synthase_N-terminal_domain	253	gi|407939372|ref|YP_006855013.1|	-	391	4.3e-11	30.5	3.4	1	1	3.7e-11	1.1e-10	29.2	2.6	148	215	62	130	27	145	0.83
YP_006855233.1	acetyl-CoA acetyltransferase [Acidovorax sp. KKS102]	acetyl-CoA acetyltransferase	Acidovorax sp. KKS102	ketoacyl-synt	PF00109.22	Beta-ketoacyl_synthase_N-terminal_domain	253	gi|407939592|ref|YP_006855233.1|	-	393	5.3e-09	23.7	0.7	1	3	0.013	0.039	1.2	0	92	118	32	58	29	77	0.8
YP_006855233.1	acetyl-CoA acetyltransferase [Acidovorax sp. KKS102]	acetyl-CoA acetyltransferase	Acidovorax sp. KKS102	ketoacyl-synt	PF00109.22	Beta-ketoacyl_synthase_N-terminal_domain	253	gi|407939592|ref|YP_006855233.1|	-	393	5.3e-09	23.7	0.7	2	3	1.2e-06	3.5e-06	14.4	0	167	208	83	124	81	151	0.89
YP_006855233.1	acetyl-CoA acetyltransferase [Acidovorax sp. KKS102]	acetyl-CoA acetyltransferase	Acidovorax sp. KKS102	ketoacyl-synt	PF00109.22	Beta-ketoacyl_synthase_N-terminal_domain	253	gi|407939592|ref|YP_006855233.1|	-	393	5.3e-09	23.7	0.7	3	3	0.00098	0.003	4.8	0.1	82	175	280	378	237	392	0.71
YP_006856199.1	beta-ketoadipyl CoA thiolase [Acidovorax sp. KKS102]	beta-ketoadipyl CoA thiolase	Acidovorax sp. KKS102	ketoacyl-synt	PF00109.22	Beta-ketoacyl_synthase_N-terminal_domain	253	gi|407940558|ref|YP_006856199.1|	-	402	2.6e-09	24.7	0.1	1	1	2.3e-09	7e-09	23.3	0.1	170	222	87	138	78	144	0.8
YP_006856347.1	acetyl-CoA acetyltransferase [Acidovorax sp. KKS102]	acetyl-CoA acetyltransferase	Acidovorax sp. KKS102	ketoacyl-synt	PF00109.22	Beta-ketoacyl_synthase_N-terminal_domain	253	gi|407940706|ref|YP_006856347.1|	-	390	1.2e-08	22.5	7.7	1	4	0.013	0.04	1.1	0	91	116	26	51	23	72	0.81
YP_006856347.1	acetyl-CoA acetyltransferase [Acidovorax sp. KKS102]	acetyl-CoA acetyltransferase	Acidovorax sp. KKS102	ketoacyl-synt	PF00109.22	Beta-ketoacyl_synthase_N-terminal_domain	253	gi|407940706|ref|YP_006856347.1|	-	390	1.2e-08	22.5	7.7	2	4	5.6e-09	1.7e-08	22	3.1	168	207	79	118	77	127	0.88
YP_006856347.1	acetyl-CoA acetyltransferase [Acidovorax sp. KKS102]	acetyl-CoA acetyltransferase	Acidovorax sp. KKS102	ketoacyl-synt	PF00109.22	Beta-ketoacyl_synthase_N-terminal_domain	253	gi|407940706|ref|YP_006856347.1|	-	390	1.2e-08	22.5	7.7	3	4	0.35	1.1	-3.5	0	231	248	209	226	190	229	0.7
YP_006856347.1	acetyl-CoA acetyltransferase [Acidovorax sp. KKS102]	acetyl-CoA acetyltransferase	Acidovorax sp. KKS102	ketoacyl-synt	PF00109.22	Beta-ketoacyl_synthase_N-terminal_domain	253	gi|407940706|ref|YP_006856347.1|	-	390	1.2e-08	22.5	7.7	4	4	0.1	0.31	-1.8	0	146	174	321	351	265	352	0.46
YP_006856385.1	3-oxoacyl-ACP synthase [Acidovorax sp. KKS102]	3-oxoacyl-ACP synthase	Acidovorax sp. KKS102	ketoacyl-synt	PF00109.22	Beta-ketoacyl_synthase_N-terminal_domain	253	gi|407940744|ref|YP_006856385.1|	-	421	1.1e-56	179.8	4.6	1	2	7.6e-57	1.1e-56	179.8	4.6	1	253	1	255	1	255	0.88
YP_006856385.1	3-oxoacyl-ACP synthase [Acidovorax sp. KKS102]	3-oxoacyl-ACP synthase	Acidovorax sp. KKS102	ketoacyl-synt	PF00109.22	Beta-ketoacyl_synthase_N-terminal_domain	253	gi|407940744|ref|YP_006856385.1|	-	421	1.1e-56	179.8	4.6	2	2	0.054	0.081	0.1	0.9	96	128	292	326	288	361	0.61
YP_006856385.1	3-oxoacyl-ACP synthase [Acidovorax sp. KKS102]	3-oxoacyl-ACP synthase	Acidovorax sp. KKS102	Ketoacyl-synt_C	PF02801.18	Beta-ketoacyl_synthase_C-terminal_domain	118	gi|407940744|ref|YP_006856385.1|	-	421	5.8e-37	114.1	2.9	1	3	1.1	1.7	-3.5	0	29	42	87	100	77	101	0.79
YP_006856385.1	3-oxoacyl-ACP synthase [Acidovorax sp. KKS102]	3-oxoacyl-ACP synthase	Acidovorax sp. KKS102	Ketoacyl-synt_C	PF02801.18	Beta-ketoacyl_synthase_C-terminal_domain	118	gi|407940744|ref|YP_006856385.1|	-	421	5.8e-37	114.1	2.9	2	3	0.72	1.1	-2.9	0	49	62	213	226	210	228	0.8
YP_006856385.1	3-oxoacyl-ACP synthase [Acidovorax sp. KKS102]	3-oxoacyl-ACP synthase	Acidovorax sp. KKS102	Ketoacyl-synt_C	PF02801.18	Beta-ketoacyl_synthase_C-terminal_domain	118	gi|407940744|ref|YP_006856385.1|	-	421	5.8e-37	114.1	2.9	3	3	3.9e-37	5.8e-37	114.1	2.9	1	117	263	376	263	377	0.98
YP_006856462.1	acetyl-CoA acetyltransferase [Acidovorax sp. KKS102]	acetyl-CoA acetyltransferase	Acidovorax sp. KKS102	ketoacyl-synt	PF00109.22	Beta-ketoacyl_synthase_N-terminal_domain	253	gi|407940821|ref|YP_006856462.1|	-	395	3e-07	17.9	1.9	1	3	0.034	0.1	-0.2	0	94	125	35	66	28	78	0.76
YP_006856462.1	acetyl-CoA acetyltransferase [Acidovorax sp. KKS102]	acetyl-CoA acetyltransferase	Acidovorax sp. KKS102	ketoacyl-synt	PF00109.22	Beta-ketoacyl_synthase_N-terminal_domain	253	gi|407940821|ref|YP_006856462.1|	-	395	3e-07	17.9	1.9	2	3	9.9e-08	3e-07	17.9	1.9	168	208	84	124	78	142	0.9
YP_006856462.1	acetyl-CoA acetyltransferase [Acidovorax sp. KKS102]	acetyl-CoA acetyltransferase	Acidovorax sp. KKS102	ketoacyl-synt	PF00109.22	Beta-ketoacyl_synthase_N-terminal_domain	253	gi|407940821|ref|YP_006856462.1|	-	395	3e-07	17.9	1.9	3	3	0.15	0.45	-2.3	0.3	171	191	244	264	242	268	0.56
YP_006856614.1	acetyl-CoA acetyltransferase [Acidovorax sp. KKS102]	acetyl-CoA acetyltransferase	Acidovorax sp. KKS102	ketoacyl-synt	PF00109.22	Beta-ketoacyl_synthase_N-terminal_domain	253	gi|407940973|ref|YP_006856614.1|	-	401	4.3e-08	20.7	1.9	1	3	2e-07	6.1e-07	16.9	0	167	206	86	124	80	136	0.86
YP_006856614.1	acetyl-CoA acetyltransferase [Acidovorax sp. KKS102]	acetyl-CoA acetyltransferase	Acidovorax sp. KKS102	ketoacyl-synt	PF00109.22	Beta-ketoacyl_synthase_N-terminal_domain	253	gi|407940973|ref|YP_006856614.1|	-	401	4.3e-08	20.7	1.9	2	3	0.0061	0.018	2.2	0.1	223	252	242	272	226	273	0.78
YP_006856614.1	acetyl-CoA acetyltransferase [Acidovorax sp. KKS102]	acetyl-CoA acetyltransferase	Acidovorax sp. KKS102	ketoacyl-synt	PF00109.22	Beta-ketoacyl_synthase_N-terminal_domain	253	gi|407940973|ref|YP_006856614.1|	-	401	4.3e-08	20.7	1.9	3	3	0.15	0.44	-2.3	0	90	110	297	317	283	333	0.76
YP_003482712.1	acetyl-CoA acetyltransferase [Aciduliprofundum boonei T469]	acetyl-CoA acetyltransferase	Aciduliprofundum boonei T469	ketoacyl-synt	PF00109.22	Beta-ketoacyl_synthase_N-terminal_domain	253	gi|289596016|ref|YP_003482712.1|	-	388	1.9e-12	34.9	4.8	1	1	7.2e-11	1.1e-10	29.2	4.8	156	206	65	118	16	127	0.79
YP_003482712.1	acetyl-CoA acetyltransferase [Aciduliprofundum boonei T469]	acetyl-CoA acetyltransferase	Aciduliprofundum boonei T469	Ketoacyl-synt_C	PF02801.18	Beta-ketoacyl_synthase_C-terminal_domain	118	gi|289596016|ref|YP_003482712.1|	-	388	3.9e-08	21.1	0.1	1	3	0.064	0.095	0.5	0	29	47	29	47	8	54	0.86
YP_003482712.1	acetyl-CoA acetyltransferase [Aciduliprofundum boonei T469]	acetyl-CoA acetyltransferase	Aciduliprofundum boonei T469	Ketoacyl-synt_C	PF02801.18	Beta-ketoacyl_synthase_C-terminal_domain	118	gi|289596016|ref|YP_003482712.1|	-	388	3.9e-08	21.1	0.1	2	3	1.5e-05	2.2e-05	12.3	0	24	51	260	287	235	291	0.8
YP_003482712.1	acetyl-CoA acetyltransferase [Aciduliprofundum boonei T469]	acetyl-CoA acetyltransferase	Aciduliprofundum boonei T469	Ketoacyl-synt_C	PF02801.18	Beta-ketoacyl_synthase_C-terminal_domain	118	gi|289596016|ref|YP_003482712.1|	-	388	3.9e-08	21.1	0.1	3	3	0.0076	0.011	3.5	0	88	109	335	356	323	362	0.91
YP_007246763.1	acetyl-CoA acetyltransferase [Aciduliprofundum sp. MAR08-339]	acetyl-CoA acetyltransferase	Aciduliprofundum sp. MAR08-339	ketoacyl-synt	PF00109.22	Beta-ketoacyl_synthase_N-terminal_domain	253	gi|432328619|ref|YP_007246763.1|	-	388	1.1e-11	32.5	3.7	1	1	1.3e-10	2e-10	28.3	3.7	166	207	78	119	20	135	0.89
YP_007246763.1	acetyl-CoA acetyltransferase [Aciduliprofundum sp. MAR08-339]	acetyl-CoA acetyltransferase	Aciduliprofundum sp. MAR08-339	Ketoacyl-synt_C	PF02801.18	Beta-ketoacyl_synthase_C-terminal_domain	118	gi|432328619|ref|YP_007246763.1|	-	388	4e-07	17.9	0.1	1	3	0.091	0.14	0	0	31	47	31	47	14	54	0.86
YP_007246763.1	acetyl-CoA acetyltransferase [Aciduliprofundum sp. MAR08-339]	acetyl-CoA acetyltransferase	Aciduliprofundum sp. MAR08-339	Ketoacyl-synt_C	PF02801.18	Beta-ketoacyl_synthase_C-terminal_domain	118	gi|432328619|ref|YP_007246763.1|	-	388	4e-07	17.9	0.1	2	3	0.00011	0.00016	9.5	0	28	51	264	287	247	292	0.89
YP_007246763.1	acetyl-CoA acetyltransferase [Aciduliprofundum sp. MAR08-339]	acetyl-CoA acetyltransferase	Aciduliprofundum sp. MAR08-339	Ketoacyl-synt_C	PF02801.18	Beta-ketoacyl_synthase_C-terminal_domain	118	gi|432328619|ref|YP_007246763.1|	-	388	4e-07	17.9	0.1	3	3	0.0074	0.011	3.5	0	88	109	335	356	322	362	0.9
YP_005512692.1	Beta-ketoacyl-ACP synthase I [Acinetobacter baumannii 1656-2]	Beta-ketoacyl-ACP synthase I	Acinetobacter baumannii 1656-2	ketoacyl-synt	PF00109.22	Beta-ketoacyl_synthase_N-terminal_domain	253	gi|384130080|ref|YP_005512692.1|	-	409	4e-43	135.5	1.2	1	1	5e-43	7.4e-43	134.6	1.2	1	253	1	244	1	244	0.89
YP_005512692.1	Beta-ketoacyl-ACP synthase I [Acinetobacter baumannii 1656-2]	Beta-ketoacyl-ACP synthase I	Acinetobacter baumannii 1656-2	Ketoacyl-synt_C	PF02801.18	Beta-ketoacyl_synthase_C-terminal_domain	118	gi|384130080|ref|YP_005512692.1|	-	409	1.1e-34	106.8	0.2	1	1	1.4e-34	2.2e-34	105.8	0.2	1	117	252	364	252	365	0.95
YP_005512722.1	Amino acid adenylation [Acinetobacter baumannii 1656-2]	Amino acid adenylation	Acinetobacter baumannii 1656-2	Condensation	PF00668.16	Condensation_domain	301	gi|384130110|ref|YP_005512722.1|	-	1319	1.2e-49	156.7	0	1	1	8.9e-50	2.7e-49	155.5	0	7	300	17	305	13	306	0.93
YP_005512920.1	fadA [Acinetobacter baumannii 1656-2]	fadA	Acinetobacter baumannii 1656-2	ketoacyl-synt	PF00109.22	Beta-ketoacyl_synthase_N-terminal_domain	253	gi|384130308|ref|YP_005512920.1|	-	390	6.6e-07	16.8	0.4	1	4	0.44	1.3	-3.9	0	195	219	8	32	7	36	0.72
YP_005512920.1	fadA [Acinetobacter baumannii 1656-2]	fadA	Acinetobacter baumannii 1656-2	ketoacyl-synt	PF00109.22	Beta-ketoacyl_synthase_N-terminal_domain	253	gi|384130308|ref|YP_005512920.1|	-	390	6.6e-07	16.8	0.4	2	4	2.2e-07	6.6e-07	16.8	0.4	174	218	94	138	88	155	0.86
YP_005512920.1	fadA [Acinetobacter baumannii 1656-2]	fadA	Acinetobacter baumannii 1656-2	ketoacyl-synt	PF00109.22	Beta-ketoacyl_synthase_N-terminal_domain	253	gi|384130308|ref|YP_005512920.1|	-	390	6.6e-07	16.8	0.4	3	4	0.11	0.33	-1.9	0.2	173	251	239	258	222	284	0.64
YP_005512920.1	fadA [Acinetobacter baumannii 1656-2]	fadA	Acinetobacter baumannii 1656-2	ketoacyl-synt	PF00109.22	Beta-ketoacyl_synthase_N-terminal_domain	253	gi|384130308|ref|YP_005512920.1|	-	390	6.6e-07	16.8	0.4	4	4	0.11	0.34	-1.9	0	95	114	291	310	289	346	0.67
YP_005513137.1	3-oxoacyl-ACP synthase [Acinetobacter baumannii 1656-2]	3-oxoacyl-ACP synthase	Acinetobacter baumannii 1656-2	ketoacyl-synt	PF00109.22	Beta-ketoacyl_synthase_N-terminal_domain	253	gi|384130525|ref|YP_005513137.1|	-	400	1.3e-24	74.8	0.1	1	1	1.3e-24	2e-24	74.2	0.1	87	250	78	240	52	242	0.83
YP_005513137.1	3-oxoacyl-ACP synthase [Acinetobacter baumannii 1656-2]	3-oxoacyl-ACP synthase	Acinetobacter baumannii 1656-2	Ketoacyl-synt_C	PF02801.18	Beta-ketoacyl_synthase_C-terminal_domain	118	gi|384130525|ref|YP_005513137.1|	-	400	2.2e-31	96.1	0.6	1	1	3.5e-31	5.3e-31	94.9	0.6	4	113	246	351	244	357	0.94
YP_005513140.1	3-oxoacyl-(acyl carrier protein) synthase II [Acinetobacter baumannii 1656-2]	3-oxoacyl-(acyl carrier protein) synthase II	Acinetobacter baumannii 1656-2	ketoacyl-synt	PF00109.22	Beta-ketoacyl_synthase_N-terminal_domain	253	gi|384130528|ref|YP_005513140.1|	-	408	1e-45	143.9	2.7	1	1	1e-45	1.5e-45	143.4	2.7	1	253	1	246	1	246	0.89
YP_005513140.1	3-oxoacyl-(acyl carrier protein) synthase II [Acinetobacter baumannii 1656-2]	3-oxoacyl-(acyl carrier protein) synthase II	Acinetobacter baumannii 1656-2	Ketoacyl-synt_C	PF02801.18	Beta-ketoacyl_synthase_C-terminal_domain	118	gi|384130528|ref|YP_005513140.1|	-	408	3e-33	102.1	0	1	1	4.7e-33	7e-33	100.9	0	1	117	254	362	254	363	0.96
YP_005513423.1	Beta-ketoacyl-ACP synthase I [Acinetobacter baumannii 1656-2]	Beta-ketoacyl-ACP synthase I	Acinetobacter baumannii 1656-2	ketoacyl-synt	PF00109.22	Beta-ketoacyl_synthase_N-terminal_domain	253	gi|384130811|ref|YP_005513423.1|	-	409	8.1e-44	137.7	1.4	1	1	1.2e-43	1.8e-43	136.6	1.4	1	253	1	244	1	244	0.87
YP_005513423.1	Beta-ketoacyl-ACP synthase I [Acinetobacter baumannii 1656-2]	Beta-ketoacyl-ACP synthase I	Acinetobacter baumannii 1656-2	Ketoacyl-synt_C	PF02801.18	Beta-ketoacyl_synthase_C-terminal_domain	118	gi|384130811|ref|YP_005513423.1|	-	409	2.7e-35	108.8	0.7	1	1	3.2e-35	4.9e-35	107.9	0.7	1	117	252	364	252	365	0.95
YP_005514051.1	Putative acyl-CoA thiolase [Acinetobacter baumannii 1656-2]	Putative acyl-CoA thiolase	Acinetobacter baumannii 1656-2	ketoacyl-synt	PF00109.22	Beta-ketoacyl_synthase_N-terminal_domain	253	gi|384131439|ref|YP_005514051.1|	-	522	2.6e-07	18.1	0.1	1	1	2.4e-07	7.3e-07	16.7	0.1	166	206	177	217	168	231	0.82
YP_005514212.1	Putative 3-oxoacyl-ACP synthase III [Acinetobacter baumannii 1656-2]	Putative 3-oxoacyl-ACP synthase III	Acinetobacter baumannii 1656-2	ketoacyl-synt	PF00109.22	Beta-ketoacyl_synthase_N-terminal_domain	253	gi|384131600|ref|YP_005514212.1|	-	368	4.4e-09	23.9	1.6	1	2	8e-06	2.4e-05	11.7	0	61	111	71	118	2	133	0.68
YP_005514212.1	Putative 3-oxoacyl-ACP synthase III [Acinetobacter baumannii 1656-2]	Putative 3-oxoacyl-ACP synthase III	Acinetobacter baumannii 1656-2	ketoacyl-synt	PF00109.22	Beta-ketoacyl_synthase_N-terminal_domain	253	gi|384131600|ref|YP_005514212.1|	-	368	4.4e-09	23.9	1.6	2	2	1e-05	3.1e-05	11.3	0.6	154	199	134	179	122	184	0.86
YP_005514364.1	Beta-ketoadipyl CoA thiolase with thiolase-like domain [Acinetobacter baumannii 1656-2]	Beta-ketoadipyl CoA thiolase with thiolase-like domain	Acinetobacter baumannii 1656-2	ketoacyl-synt	PF00109.22	Beta-ketoacyl_synthase_N-terminal_domain	253	gi|384131752|ref|YP_005514364.1|	-	402	9.8e-12	32.6	0	1	1	6.9e-12	2.1e-11	31.6	0	167	222	82	136	78	142	0.85
YP_005514411.1	Beta-ketoadipyl CoA thiolase [Acinetobacter baumannii 1656-2]	Beta-ketoadipyl CoA thiolase	Acinetobacter baumannii 1656-2	ketoacyl-synt	PF00109.22	Beta-ketoacyl_synthase_N-terminal_domain	253	gi|384131799|ref|YP_005514411.1|	-	401	2.3e-07	18.3	0.8	1	2	1.8e-07	5.4e-07	17.1	0.2	170	222	84	135	65	143	0.77
YP_005514411.1	Beta-ketoadipyl CoA thiolase [Acinetobacter baumannii 1656-2]	Beta-ketoadipyl CoA thiolase	Acinetobacter baumannii 1656-2	ketoacyl-synt	PF00109.22	Beta-ketoacyl_synthase_N-terminal_domain	253	gi|384131799|ref|YP_005514411.1|	-	401	2.3e-07	18.3	0.8	2	2	0.31	0.92	-3.3	0	89	192	363	377	360	391	0.54
YP_005514798.1	Putative acetyl-CoA acetyltransferase [Acinetobacter baumannii 1656-2]	Putative acetyl-CoA acetyltransferase	Acinetobacter baumannii 1656-2	ketoacyl-synt	PF00109.22	Beta-ketoacyl_synthase_N-terminal_domain	253	gi|384132186|ref|YP_005514798.1|	-	390	3.7e-07	17.6	5.6	1	5	0.0022	0.0033	4.7	0	93	137	31	75	26	86	0.8
YP_005514798.1	Putative acetyl-CoA acetyltransferase [Acinetobacter baumannii 1656-2]	Putative acetyl-CoA acetyltransferase	Acinetobacter baumannii 1656-2	ketoacyl-synt	PF00109.22	Beta-ketoacyl_synthase_N-terminal_domain	253	gi|384132186|ref|YP_005514798.1|	-	390	3.7e-07	17.6	5.6	2	5	5.8e-06	8.7e-06	13.1	1.2	169	208	82	121	78	131	0.89
YP_005514798.1	Putative acetyl-CoA acetyltransferase [Acinetobacter baumannii 1656-2]	Putative acetyl-CoA acetyltransferase	Acinetobacter baumannii 1656-2	ketoacyl-synt	PF00109.22	Beta-ketoacyl_synthase_N-terminal_domain	253	gi|384132186|ref|YP_005514798.1|	-	390	3.7e-07	17.6	5.6	3	5	0.37	0.56	-2.6	0	82	101	172	191	148	217	0.65
YP_005514798.1	Putative acetyl-CoA acetyltransferase [Acinetobacter baumannii 1656-2]	Putative acetyl-CoA acetyltransferase	Acinetobacter baumannii 1656-2	ketoacyl-synt	PF00109.22	Beta-ketoacyl_synthase_N-terminal_domain	253	gi|384132186|ref|YP_005514798.1|	-	390	3.7e-07	17.6	5.6	4	5	0.17	0.25	-1.5	0	234	251	244	261	229	263	0.71
YP_005514798.1	Putative acetyl-CoA acetyltransferase [Acinetobacter baumannii 1656-2]	Putative acetyl-CoA acetyltransferase	Acinetobacter baumannii 1656-2	ketoacyl-synt	PF00109.22	Beta-ketoacyl_synthase_N-terminal_domain	253	gi|384132186|ref|YP_005514798.1|	-	390	3.7e-07	17.6	5.6	5	5	0.39	0.58	-2.7	0	96	112	295	311	292	350	0.67
YP_005514798.1	Putative acetyl-CoA acetyltransferase [Acinetobacter baumannii 1656-2]	Putative acetyl-CoA acetyltransferase	Acinetobacter baumannii 1656-2	Ketoacyl-synt_C	PF02801.18	Beta-ketoacyl_synthase_C-terminal_domain	118	gi|384132186|ref|YP_005514798.1|	-	390	6.2e-06	14	0.1	1	2	0.00038	0.00056	7.7	0	14	47	20	51	5	53	0.7
YP_005514798.1	Putative acetyl-CoA acetyltransferase [Acinetobacter baumannii 1656-2]	Putative acetyl-CoA acetyltransferase	Acinetobacter baumannii 1656-2	Ketoacyl-synt_C	PF02801.18	Beta-ketoacyl_synthase_C-terminal_domain	118	gi|384132186|ref|YP_005514798.1|	-	390	6.2e-06	14	0.1	2	2	0.015	0.022	2.6	0	27	49	292	314	269	367	0.72
YP_005515000.1	catF [Acinetobacter baumannii 1656-2]	catF	Acinetobacter baumannii 1656-2	ketoacyl-synt	PF00109.22	Beta-ketoacyl_synthase_N-terminal_domain	253	gi|384132388|ref|YP_005515000.1|	-	404	4.4e-10	27.2	0.7	1	2	4.8e-10	1.4e-09	25.5	0.2	167	208	82	123	67	142	0.84
YP_005515000.1	catF [Acinetobacter baumannii 1656-2]	catF	Acinetobacter baumannii 1656-2	ketoacyl-synt	PF00109.22	Beta-ketoacyl_synthase_N-terminal_domain	253	gi|384132388|ref|YP_005515000.1|	-	404	4.4e-10	27.2	0.7	2	2	0.046	0.14	-0.6	0	67	110	241	281	189	332	0.73
YP_005515040.1	pcaF [Acinetobacter baumannii 1656-2]	pcaF	Acinetobacter baumannii 1656-2	ketoacyl-synt	PF00109.22	Beta-ketoacyl_synthase_N-terminal_domain	253	gi|384132428|ref|YP_005515040.1|	-	403	6.1e-10	26.7	0.6	1	2	4.9e-10	1.5e-09	25.5	0.2	167	208	84	125	69	144	0.84
YP_005515040.1	pcaF [Acinetobacter baumannii 1656-2]	pcaF	Acinetobacter baumannii 1656-2	ketoacyl-synt	PF00109.22	Beta-ketoacyl_synthase_N-terminal_domain	253	gi|384132428|ref|YP_005515040.1|	-	403	6.1e-10	26.7	0.6	2	2	0.14	0.41	-2.2	0	80	107	256	280	208	324	0.65
YP_005515270.1	basD [Acinetobacter baumannii 1656-2]	basD	Acinetobacter baumannii 1656-2	Condensation	PF00668.16	Condensation_domain	301	gi|384132658|ref|YP_005515270.1|	-	949	3.4e-53	168.3	14.2	1	2	1.4e-34	4.1e-34	105.6	1	15	301	6	290	1	290	0.88
YP_005515270.1	basD [Acinetobacter baumannii 1656-2]	basD	Acinetobacter baumannii 1656-2	Condensation	PF00668.16	Condensation_domain	301	gi|384132658|ref|YP_005515270.1|	-	949	3.4e-53	168.3	14.2	2	2	6.4e-23	1.9e-22	67.3	6.2	6	272	441	695	437	697	0.9
YP_005515277.1	basB [Acinetobacter baumannii 1656-2]	basB	Acinetobacter baumannii 1656-2	Condensation	PF00668.16	Condensation_domain	301	gi|384132665|ref|YP_005515277.1|	-	676	1.6e-47	149.7	11.6	1	2	7.2e-05	0.00022	8	1.5	34	160	18	138	5	191	0.82
YP_005515277.1	basB [Acinetobacter baumannii 1656-2]	basB	Acinetobacter baumannii 1656-2	Condensation	PF00668.16	Condensation_domain	301	gi|384132665|ref|YP_005515277.1|	-	676	1.6e-47	149.7	11.6	2	2	4.2e-47	1.3e-46	146.7	2.9	3	299	253	545	251	547	0.9
YP_005515650.1	wax-dgaT [Acinetobacter baumannii 1656-2]	wax-dgaT	Acinetobacter baumannii 1656-2	Condensation	PF00668.16	Condensation_domain	301	gi|384133038|ref|YP_005515650.1|	-	461	1e-09	25.5	0.2	1	2	5.8e-07	1.7e-06	14.9	0.1	82	154	79	151	67	175	0.72
YP_005515650.1	wax-dgaT [Acinetobacter baumannii 1656-2]	wax-dgaT	Acinetobacter baumannii 1656-2	Condensation	PF00668.16	Condensation_domain	301	gi|384133038|ref|YP_005515650.1|	-	461	1e-09	25.5	0.2	2	2	5.3e-05	0.00016	8.5	0	224	261	237	274	205	309	0.8
YP_005515715.1	Putative acetyl-CoA acetyltransferase [Acinetobacter baumannii 1656-2]	Putative acetyl-CoA acetyltransferase	Acinetobacter baumannii 1656-2	ketoacyl-synt	PF00109.22	Beta-ketoacyl_synthase_N-terminal_domain	253	gi|384133103|ref|YP_005515715.1|	-	391	3.3e-08	21	6.9	1	4	0.00096	0.0029	4.9	0	91	127	29	65	26	85	0.77
YP_005515715.1	Putative acetyl-CoA acetyltransferase [Acinetobacter baumannii 1656-2]	Putative acetyl-CoA acetyltransferase	Acinetobacter baumannii 1656-2	ketoacyl-synt	PF00109.22	Beta-ketoacyl_synthase_N-terminal_domain	253	gi|384133103|ref|YP_005515715.1|	-	391	3.3e-08	21	6.9	2	4	7e-08	2.1e-07	18.4	1.3	169	208	82	121	76	136	0.87
YP_005515715.1	Putative acetyl-CoA acetyltransferase [Acinetobacter baumannii 1656-2]	Putative acetyl-CoA acetyltransferase	Acinetobacter baumannii 1656-2	ketoacyl-synt	PF00109.22	Beta-ketoacyl_synthase_N-terminal_domain	253	gi|384133103|ref|YP_005515715.1|	-	391	3.3e-08	21	6.9	3	4	0.25	0.74	-3	0	113	136	151	174	145	198	0.56
YP_005515715.1	Putative acetyl-CoA acetyltransferase [Acinetobacter baumannii 1656-2]	Putative acetyl-CoA acetyltransferase	Acinetobacter baumannii 1656-2	ketoacyl-synt	PF00109.22	Beta-ketoacyl_synthase_N-terminal_domain	253	gi|384133103|ref|YP_005515715.1|	-	391	3.3e-08	21	6.9	4	4	0.22	0.66	-2.8	0.1	233	251	243	261	233	263	0.67
YP_005515725.1	Putative thiolase [Acinetobacter baumannii 1656-2]	Putative thiolase	Acinetobacter baumannii 1656-2	ketoacyl-synt	PF00109.22	Beta-ketoacyl_synthase_N-terminal_domain	253	gi|384133113|ref|YP_005515725.1|	-	401	4.3e-10	27.3	0.1	1	2	1.2e-09	3.7e-09	24.2	0	175	206	91	122	73	145	0.92
YP_005515725.1	Putative thiolase [Acinetobacter baumannii 1656-2]	Putative thiolase	Acinetobacter baumannii 1656-2	ketoacyl-synt	PF00109.22	Beta-ketoacyl_synthase_N-terminal_domain	253	gi|384133113|ref|YP_005515725.1|	-	401	4.3e-10	27.3	0.1	2	2	0.028	0.085	0.1	0	95	114	304	323	292	364	0.81
YP_002317571.1	amino acid adenylation [Acinetobacter baumannii AB0057]	amino acid adenylation	Acinetobacter baumannii AB0057	Condensation	PF00668.16	Condensation_domain	301	gi|213155526|ref|YP_002317571.1|	-	1319	2.1e-49	155.8	0	1	1	1.4e-49	4.3e-49	154.8	0	7	300	17	305	13	306	0.93
YP_002317689.1	chloramphenicol acetyltransferase [Acinetobacter baumannii AB0057]	chloramphenicol acetyltransferase	Acinetobacter baumannii AB0057	Condensation	PF00668.16	Condensation_domain	301	gi|213155644|ref|YP_002317689.1|	-	219	3.3e-06	14	0.1	1	2	0.011	0.032	0.9	0	48	72	63	86	26	118	0.77
YP_002317689.1	chloramphenicol acetyltransferase [Acinetobacter baumannii AB0057]	chloramphenicol acetyltransferase	Acinetobacter baumannii AB0057	Condensation	PF00668.16	Condensation_domain	301	gi|213155644|ref|YP_002317689.1|	-	219	3.3e-06	14	0.1	2	2	8.4e-06	2.5e-05	11.1	0	131	160	187	216	168	219	0.88
YP_002317795.1	3-ketoacyl-CoA thiolase [Acinetobacter baumannii AB0057]	3-ketoacyl-CoA thiolase	Acinetobacter baumannii AB0057	ketoacyl-synt	PF00109.22	Beta-ketoacyl_synthase_N-terminal_domain	253	gi|213155750|ref|YP_002317795.1|	-	390	6.6e-07	16.8	0.4	1	4	0.44	1.3	-3.9	0	195	219	8	32	7	36	0.72
YP_002317795.1	3-ketoacyl-CoA thiolase [Acinetobacter baumannii AB0057]	3-ketoacyl-CoA thiolase	Acinetobacter baumannii AB0057	ketoacyl-synt	PF00109.22	Beta-ketoacyl_synthase_N-terminal_domain	253	gi|213155750|ref|YP_002317795.1|	-	390	6.6e-07	16.8	0.4	2	4	2.2e-07	6.6e-07	16.8	0.4	174	218	94	138	88	155	0.86
YP_002317795.1	3-ketoacyl-CoA thiolase [Acinetobacter baumannii AB0057]	3-ketoacyl-CoA thiolase	Acinetobacter baumannii AB0057	ketoacyl-synt	PF00109.22	Beta-ketoacyl_synthase_N-terminal_domain	253	gi|213155750|ref|YP_002317795.1|	-	390	6.6e-07	16.8	0.4	3	4	0.11	0.33	-1.9	0.2	173	251	239	258	222	284	0.64
YP_002317795.1	3-ketoacyl-CoA thiolase [Acinetobacter baumannii AB0057]	3-ketoacyl-CoA thiolase	Acinetobacter baumannii AB0057	ketoacyl-synt	PF00109.22	Beta-ketoacyl_synthase_N-terminal_domain	253	gi|213155750|ref|YP_002317795.1|	-	390	6.6e-07	16.8	0.4	4	4	0.11	0.34	-1.9	0	95	114	291	310	289	346	0.67
YP_002318300.1	3-oxoacyl-ACP synthase [Acinetobacter baumannii AB0057]	3-oxoacyl-ACP synthase	Acinetobacter baumannii AB0057	ketoacyl-synt	PF00109.22	Beta-ketoacyl_synthase_N-terminal_domain	253	gi|213156639|ref|YP_002318300.1|	-	409	8.1e-44	137.7	1.4	1	1	1.2e-43	1.8e-43	136.6	1.4	1	253	1	244	1	244	0.87
YP_002318300.1	3-oxoacyl-ACP synthase [Acinetobacter baumannii AB0057]	3-oxoacyl-ACP synthase	Acinetobacter baumannii AB0057	Ketoacyl-synt_C	PF02801.18	Beta-ketoacyl_synthase_C-terminal_domain	118	gi|213156639|ref|YP_002318300.1|	-	409	2.7e-35	108.8	0.7	1	1	3.2e-35	4.9e-35	107.9	0.7	1	117	252	364	252	365	0.95
YP_002318721.1	3-oxoacyl-ACP synthase [Acinetobacter baumannii AB0057]	3-oxoacyl-ACP synthase	Acinetobacter baumannii AB0057	ketoacyl-synt	PF00109.22	Beta-ketoacyl_synthase_N-terminal_domain	253	gi|213156301|ref|YP_002318721.1|	-	368	4.4e-09	23.9	1.6	1	2	8e-06	2.4e-05	11.7	0	61	111	71	118	2	133	0.68
YP_002318721.1	3-oxoacyl-ACP synthase [Acinetobacter baumannii AB0057]	3-oxoacyl-ACP synthase	Acinetobacter baumannii AB0057	ketoacyl-synt	PF00109.22	Beta-ketoacyl_synthase_N-terminal_domain	253	gi|213156301|ref|YP_002318721.1|	-	368	4.4e-09	23.9	1.6	2	2	1e-05	3.1e-05	11.3	0.6	154	199	134	179	122	184	0.86
YP_002318901.1	beta-ketoadipyl CoA thiolase [Acinetobacter baumannii AB0057]	beta-ketoadipyl CoA thiolase	Acinetobacter baumannii AB0057	ketoacyl-synt	PF00109.22	Beta-ketoacyl_synthase_N-terminal_domain	253	gi|213156856|ref|YP_002318901.1|	-	402	1.1e-11	32.5	0.1	1	1	7.8e-12	2.3e-11	31.4	0.1	167	222	82	136	80	142	0.85
YP_002318956.1	acetyl-CoA acetyltransferase [Acinetobacter baumannii AB0057]	acetyl-CoA acetyltransferase	Acinetobacter baumannii AB0057	ketoacyl-synt	PF00109.22	Beta-ketoacyl_synthase_N-terminal_domain	253	gi|213156911|ref|YP_002318956.1|	-	401	2.2e-07	18.4	0.8	1	2	1.8e-07	5.4e-07	17.1	0.2	170	222	84	135	65	143	0.77
YP_002318956.1	acetyl-CoA acetyltransferase [Acinetobacter baumannii AB0057]	acetyl-CoA acetyltransferase	Acinetobacter baumannii AB0057	ketoacyl-synt	PF00109.22	Beta-ketoacyl_synthase_N-terminal_domain	253	gi|213156911|ref|YP_002318956.1|	-	401	2.2e-07	18.4	0.8	2	2	0.31	0.92	-3.3	0	89	192	363	377	360	391	0.54
YP_002319317.1	acetyl-CoA acetyltransferase [Acinetobacter baumannii AB0057]	acetyl-CoA acetyltransferase	Acinetobacter baumannii AB0057	ketoacyl-synt	PF00109.22	Beta-ketoacyl_synthase_N-terminal_domain	253	gi|213157272|ref|YP_002319317.1|	-	390	3.7e-07	17.6	5.6	1	5	0.0022	0.0033	4.7	0	93	137	31	75	26	86	0.8
YP_002319317.1	acetyl-CoA acetyltransferase [Acinetobacter baumannii AB0057]	acetyl-CoA acetyltransferase	Acinetobacter baumannii AB0057	ketoacyl-synt	PF00109.22	Beta-ketoacyl_synthase_N-terminal_domain	253	gi|213157272|ref|YP_002319317.1|	-	390	3.7e-07	17.6	5.6	2	5	5.8e-06	8.7e-06	13.1	1.2	169	208	82	121	78	131	0.89
YP_002319317.1	acetyl-CoA acetyltransferase [Acinetobacter baumannii AB0057]	acetyl-CoA acetyltransferase	Acinetobacter baumannii AB0057	ketoacyl-synt	PF00109.22	Beta-ketoacyl_synthase_N-terminal_domain	253	gi|213157272|ref|YP_002319317.1|	-	390	3.7e-07	17.6	5.6	3	5	0.37	0.56	-2.6	0	82	101	172	191	148	217	0.65
YP_002319317.1	acetyl-CoA acetyltransferase [Acinetobacter baumannii AB0057]	acetyl-CoA acetyltransferase	Acinetobacter baumannii AB0057	ketoacyl-synt	PF00109.22	Beta-ketoacyl_synthase_N-terminal_domain	253	gi|213157272|ref|YP_002319317.1|	-	390	3.7e-07	17.6	5.6	4	5	0.17	0.25	-1.5	0	234	251	244	261	229	263	0.71
YP_002319317.1	acetyl-CoA acetyltransferase [Acinetobacter baumannii AB0057]	acetyl-CoA acetyltransferase	Acinetobacter baumannii AB0057	ketoacyl-synt	PF00109.22	Beta-ketoacyl_synthase_N-terminal_domain	253	gi|213157272|ref|YP_002319317.1|	-	390	3.7e-07	17.6	5.6	5	5	0.39	0.58	-2.7	0	96	112	295	311	292	350	0.67
YP_002319317.1	acetyl-CoA acetyltransferase [Acinetobacter baumannii AB0057]	acetyl-CoA acetyltransferase	Acinetobacter baumannii AB0057	Ketoacyl-synt_C	PF02801.18	Beta-ketoacyl_synthase_C-terminal_domain	118	gi|213157272|ref|YP_002319317.1|	-	390	6.2e-06	14	0.1	1	2	0.00038	0.00056	7.7	0	14	47	20	51	5	53	0.7
YP_002319317.1	acetyl-CoA acetyltransferase [Acinetobacter baumannii AB0057]	acetyl-CoA acetyltransferase	Acinetobacter baumannii AB0057	Ketoacyl-synt_C	PF02801.18	Beta-ketoacyl_synthase_C-terminal_domain	118	gi|213157272|ref|YP_002319317.1|	-	390	6.2e-06	14	0.1	2	2	0.015	0.022	2.6	0	27	49	292	314	269	367	0.72
YP_002319540.1	beta-ketoadipyl CoA thiolase [Acinetobacter baumannii AB0057]	beta-ketoadipyl CoA thiolase	Acinetobacter baumannii AB0057	ketoacyl-synt	PF00109.22	Beta-ketoacyl_synthase_N-terminal_domain	253	gi|213157495|ref|YP_002319540.1|	-	404	8e-10	26.3	0.7	1	2	5e-10	1.5e-09	25.5	0.2	167	208	82	123	67	142	0.84
YP_002319540.1	beta-ketoadipyl CoA thiolase [Acinetobacter baumannii AB0057]	beta-ketoadipyl CoA thiolase	Acinetobacter baumannii AB0057	ketoacyl-synt	PF00109.22	Beta-ketoacyl_synthase_N-terminal_domain	253	gi|213157495|ref|YP_002319540.1|	-	404	8e-10	26.3	0.7	2	2	0.34	1	-3.5	0	87	105	258	276	225	291	0.59
YP_002319580.1	beta-ketoadipyl CoA thiolase [Acinetobacter baumannii AB0057]	beta-ketoadipyl CoA thiolase	Acinetobacter baumannii AB0057	ketoacyl-synt	PF00109.22	Beta-ketoacyl_synthase_N-terminal_domain	253	gi|213157535|ref|YP_002319580.1|	-	403	7.5e-10	26.4	0.6	1	2	4.9e-10	1.5e-09	25.5	0.2	167	208	84	125	69	144	0.84
YP_002319580.1	beta-ketoadipyl CoA thiolase [Acinetobacter baumannii AB0057]	beta-ketoadipyl CoA thiolase	Acinetobacter baumannii AB0057	ketoacyl-synt	PF00109.22	Beta-ketoacyl_synthase_N-terminal_domain	253	gi|213157535|ref|YP_002319580.1|	-	403	7.5e-10	26.4	0.6	2	2	0.38	1.1	-3.6	0	88	107	261	280	234	295	0.6
YP_002319732.1	acetyl-CoA acetyltransferase [Acinetobacter baumannii AB0057]	acetyl-CoA acetyltransferase	Acinetobacter baumannii AB0057	ketoacyl-synt	PF00109.22	Beta-ketoacyl_synthase_N-terminal_domain	253	gi|213158434|ref|YP_002319732.1|	-	522	2.6e-07	18.1	0.1	1	1	2.4e-07	7.3e-07	16.7	0.1	166	206	177	217	168	231	0.82
YP_002320150.1	nonribosomal peptide synthetase BasD [Acinetobacter baumannii AB0057]	nonribosomal peptide synthetase BasD	Acinetobacter baumannii AB0057	Condensation	PF00668.16	Condensation_domain	301	gi|213158099|ref|YP_002320150.1|	-	980	2.6e-56	178.5	12.5	1	2	1.9e-36	5.8e-36	111.7	0.7	4	301	26	321	23	321	0.89
YP_002320150.1	nonribosomal peptide synthetase BasD [Acinetobacter baumannii AB0057]	nonribosomal peptide synthetase BasD	Acinetobacter baumannii AB0057	Condensation	PF00668.16	Condensation_domain	301	gi|213158099|ref|YP_002320150.1|	-	980	2.6e-56	178.5	12.5	2	2	4.7e-24	1.4e-23	71	5.2	6	272	472	726	468	728	0.9
YP_002320158.1	non-ribosomal peptide synthetase [Acinetobacter baumannii AB0057]	non-ribosomal peptide synthetase	Acinetobacter baumannii AB0057	Condensation	PF00668.16	Condensation_domain	301	gi|213158107|ref|YP_002320158.1|	-	698	2.3e-49	155.7	9.1	1	2	6.4e-07	1.9e-06	14.8	0.6	33	139	39	139	12	177	0.8
YP_002320158.1	non-ribosomal peptide synthetase [Acinetobacter baumannii AB0057]	non-ribosomal peptide synthetase	Acinetobacter baumannii AB0057	Condensation	PF00668.16	Condensation_domain	301	gi|213158107|ref|YP_002320158.1|	-	698	2.3e-49	155.7	9.1	2	2	1.4e-46	4.1e-46	145	2.3	3	299	275	567	273	569	0.9
YP_002320592.1	hypothetical protein AB57_3277 [Acinetobacter baumannii AB0057]	hypothetical protein AB57_3277	Acinetobacter baumannii AB0057	Condensation	PF00668.16	Condensation_domain	301	gi|213157794|ref|YP_002320592.1|	-	461	6.7e-10	26.1	0.1	1	2	4e-07	1.2e-06	15.4	0.1	82	157	79	154	67	181	0.73
YP_002320592.1	hypothetical protein AB57_3277 [Acinetobacter baumannii AB0057]	hypothetical protein AB57_3277	Acinetobacter baumannii AB0057	Condensation	PF00668.16	Condensation_domain	301	gi|213157794|ref|YP_002320592.1|	-	461	6.7e-10	26.1	0.1	2	2	4.9e-05	0.00015	8.6	0	224	261	237	274	205	310	0.79
YP_002320657.1	acetyl-CoA acetyltransferase [Acinetobacter baumannii AB0057]	acetyl-CoA acetyltransferase	Acinetobacter baumannii AB0057	ketoacyl-synt	PF00109.22	Beta-ketoacyl_synthase_N-terminal_domain	253	gi|213157859|ref|YP_002320657.1|	-	391	3.3e-08	21	6.9	1	4	0.00096	0.0029	4.9	0	91	127	29	65	26	85	0.77
YP_002320657.1	acetyl-CoA acetyltransferase [Acinetobacter baumannii AB0057]	acetyl-CoA acetyltransferase	Acinetobacter baumannii AB0057	ketoacyl-synt	PF00109.22	Beta-ketoacyl_synthase_N-terminal_domain	253	gi|213157859|ref|YP_002320657.1|	-	391	3.3e-08	21	6.9	2	4	7e-08	2.1e-07	18.4	1.3	169	208	82	121	76	136	0.87
YP_002320657.1	acetyl-CoA acetyltransferase [Acinetobacter baumannii AB0057]	acetyl-CoA acetyltransferase	Acinetobacter baumannii AB0057	ketoacyl-synt	PF00109.22	Beta-ketoacyl_synthase_N-terminal_domain	253	gi|213157859|ref|YP_002320657.1|	-	391	3.3e-08	21	6.9	3	4	0.25	0.74	-3	0	113	136	151	174	145	198	0.56
YP_002320657.1	acetyl-CoA acetyltransferase [Acinetobacter baumannii AB0057]	acetyl-CoA acetyltransferase	Acinetobacter baumannii AB0057	ketoacyl-synt	PF00109.22	Beta-ketoacyl_synthase_N-terminal_domain	253	gi|213157859|ref|YP_002320657.1|	-	391	3.3e-08	21	6.9	4	4	0.22	0.66	-2.8	0.1	233	251	243	261	233	263	0.67
YP_002320666.1	acetyl-CoA acetyltransferase [Acinetobacter baumannii AB0057]	acetyl-CoA acetyltransferase	Acinetobacter baumannii AB0057	ketoacyl-synt	PF00109.22	Beta-ketoacyl_synthase_N-terminal_domain	253	gi|213157868|ref|YP_002320666.1|	-	401	4.2e-10	27.3	0.1	1	2	1.3e-09	3.8e-09	24.2	0.1	175	206	91	122	73	144	0.93
YP_002320666.1	acetyl-CoA acetyltransferase [Acinetobacter baumannii AB0057]	acetyl-CoA acetyltransferase	Acinetobacter baumannii AB0057	ketoacyl-synt	PF00109.22	Beta-ketoacyl_synthase_N-terminal_domain	253	gi|213157868|ref|YP_002320666.1|	-	401	4.2e-10	27.3	0.1	2	2	0.029	0.088	0	0	95	114	304	323	293	364	0.82
YP_002324533.1	acetyl-CoA acetyltransferases family protein [Acinetobacter baumannii AB307-0294]	acetyl-CoA acetyltransferases family protein	Acinetobacter baumannii AB307-0294	ketoacyl-synt	PF00109.22	Beta-ketoacyl_synthase_N-terminal_domain	253	gi|215482351|ref|YP_002324533.1|	-	401	4.2e-10	27.3	0.1	1	2	1.3e-09	3.8e-09	24.2	0.1	175	206	91	122	73	144	0.93
YP_002324533.1	acetyl-CoA acetyltransferases family protein [Acinetobacter baumannii AB307-0294]	acetyl-CoA acetyltransferases family protein	Acinetobacter baumannii AB307-0294	ketoacyl-synt	PF00109.22	Beta-ketoacyl_synthase_N-terminal_domain	253	gi|215482351|ref|YP_002324533.1|	-	401	4.2e-10	27.3	0.1	2	2	0.029	0.088	0	0	95	114	304	323	293	364	0.82
YP_002324543.1	acetyl-CoA acetyltransferase(acetoacetyl-CoA thiolase) [Acinetobacter baumannii AB307-0294]	acetyl-CoA acetyltransferase(acetoacetyl-CoA thiolase)	Acinetobacter baumannii AB307-0294	ketoacyl-synt	PF00109.22	Beta-ketoacyl_synthase_N-terminal_domain	253	gi|215482361|ref|YP_002324543.1|	-	391	3.3e-08	21	6.9	1	4	0.00096	0.0029	4.9	0	91	127	29	65	26	85	0.77
YP_002324543.1	acetyl-CoA acetyltransferase(acetoacetyl-CoA thiolase) [Acinetobacter baumannii AB307-0294]	acetyl-CoA acetyltransferase(acetoacetyl-CoA thiolase)	Acinetobacter baumannii AB307-0294	ketoacyl-synt	PF00109.22	Beta-ketoacyl_synthase_N-terminal_domain	253	gi|215482361|ref|YP_002324543.1|	-	391	3.3e-08	21	6.9	2	4	7e-08	2.1e-07	18.4	1.3	169	208	82	121	76	136	0.87
YP_002324543.1	acetyl-CoA acetyltransferase(acetoacetyl-CoA thiolase) [Acinetobacter baumannii AB307-0294]	acetyl-CoA acetyltransferase(acetoacetyl-CoA thiolase)	Acinetobacter baumannii AB307-0294	ketoacyl-synt	PF00109.22	Beta-ketoacyl_synthase_N-terminal_domain	253	gi|215482361|ref|YP_002324543.1|	-	391	3.3e-08	21	6.9	3	4	0.25	0.74	-3	0	113	136	151	174	145	198	0.56
YP_002324543.1	acetyl-CoA acetyltransferase(acetoacetyl-CoA thiolase) [Acinetobacter baumannii AB307-0294]	acetyl-CoA acetyltransferase(acetoacetyl-CoA thiolase)	Acinetobacter baumannii AB307-0294	ketoacyl-synt	PF00109.22	Beta-ketoacyl_synthase_N-terminal_domain	253	gi|215482361|ref|YP_002324543.1|	-	391	3.3e-08	21	6.9	4	4	0.22	0.66	-2.8	0.1	233	251	243	261	233	263	0.67
YP_002324609.1	bifunctional protein [Acinetobacter baumannii AB307-0294]	bifunctional protein	Acinetobacter baumannii AB307-0294	Condensation	PF00668.16	Condensation_domain	301	gi|215482427|ref|YP_002324609.1|	-	461	6.7e-10	26.1	0.1	1	2	4e-07	1.2e-06	15.4	0.1	82	157	79	154	67	181	0.73
YP_002324609.1	bifunctional protein [Acinetobacter baumannii AB307-0294]	bifunctional protein	Acinetobacter baumannii AB307-0294	Condensation	PF00668.16	Condensation_domain	301	gi|215482427|ref|YP_002324609.1|	-	461	6.7e-10	26.1	0.1	2	2	4.9e-05	0.00015	8.6	0	224	261	237	274	205	310	0.79
YP_002324963.1	actinomycin synthetase II, partial [Acinetobacter baumannii AB307-0294]	actinomycin synthetase II, partial	Acinetobacter baumannii AB307-0294	Condensation	PF00668.16	Condensation_domain	301	gi|217322880|ref|YP_002324963.1|	-	485	1.2e-46	146.8	2.3	1	1	5.4e-47	1.6e-46	146.4	2.3	3	299	62	354	60	356	0.9
YP_002324964.1	hypothetical protein ABBFA_001053 [Acinetobacter baumannii AB307-0294]	hypothetical protein ABBFA_001053	Acinetobacter baumannii AB307-0294	Condensation	PF00668.16	Condensation_domain	301	gi|217322871|ref|YP_002324964.1|	-	217	1e-07	19	0.5	1	1	4e-08	1.2e-07	18.7	0.5	14	140	21	140	11	192	0.8
YP_002324972.1	High-molecular-weight protein 2 (HMWP2) [Acinetobacter baumannii AB307-0294]	High-molecular-weight protein 2 (HMWP2)	Acinetobacter baumannii AB307-0294	Condensation	PF00668.16	Condensation_domain	301	gi|215482771|ref|YP_002324972.1|	-	980	2.6e-56	178.5	12.5	1	2	1.9e-36	5.8e-36	111.7	0.7	4	301	26	321	23	321	0.89
YP_002324972.1	High-molecular-weight protein 2 (HMWP2) [Acinetobacter baumannii AB307-0294]	High-molecular-weight protein 2 (HMWP2)	Acinetobacter baumannii AB307-0294	Condensation	PF00668.16	Condensation_domain	301	gi|215482771|ref|YP_002324972.1|	-	980	2.6e-56	178.5	12.5	2	2	4.7e-24	1.4e-23	71	5.2	6	272	472	726	468	728	0.9
YP_002325317.1	3-ketoacyl-CoA thiolase(Fatty acid oxidation complexsubunit beta) [Acinetobacter baumannii AB307-0294]	3-ketoacyl-CoA thiolase(Fatty acid oxidation complexsubunit beta)	Acinetobacter baumannii AB307-0294	ketoacyl-synt	PF00109.22	Beta-ketoacyl_synthase_N-terminal_domain	253	gi|215483110|ref|YP_002325317.1|	-	522	2.6e-07	18.1	0.1	1	1	2.4e-07	7.3e-07	16.7	0.1	166	206	177	217	168	231	0.82
YP_002325506.1	beta-ketoadipyl CoA thiolase [Acinetobacter baumannii AB307-0294]	beta-ketoadipyl CoA thiolase	Acinetobacter baumannii AB307-0294	ketoacyl-synt	PF00109.22	Beta-ketoacyl_synthase_N-terminal_domain	253	gi|215483299|ref|YP_002325506.1|	-	373	6.7e-10	26.6	0.7	1	2	4.4e-10	1.3e-09	25.6	0.2	167	208	51	92	36	111	0.84
YP_002325506.1	beta-ketoadipyl CoA thiolase [Acinetobacter baumannii AB307-0294]	beta-ketoadipyl CoA thiolase	Acinetobacter baumannii AB307-0294	ketoacyl-synt	PF00109.22	Beta-ketoacyl_synthase_N-terminal_domain	253	gi|215483299|ref|YP_002325506.1|	-	373	6.7e-10	26.6	0.7	2	2	0.28	0.84	-3.2	0	86	105	226	245	190	261	0.6
YP_002325667.1	acetyl-CoA acetyltransferase(acetoacetyl-CoA thiolase) [Acinetobacter baumannii AB307-0294]	acetyl-CoA acetyltransferase(acetoacetyl-CoA thiolase)	Acinetobacter baumannii AB307-0294	ketoacyl-synt	PF00109.22	Beta-ketoacyl_synthase_N-terminal_domain	253	gi|215483450|ref|YP_002325667.1|	-	390	3.7e-07	17.6	5.6	1	5	0.0022	0.0033	4.7	0	93	137	31	75	26	86	0.8
YP_002325667.1	acetyl-CoA acetyltransferase(acetoacetyl-CoA thiolase) [Acinetobacter baumannii AB307-0294]	acetyl-CoA acetyltransferase(acetoacetyl-CoA thiolase)	Acinetobacter baumannii AB307-0294	ketoacyl-synt	PF00109.22	Beta-ketoacyl_synthase_N-terminal_domain	253	gi|215483450|ref|YP_002325667.1|	-	390	3.7e-07	17.6	5.6	2	5	5.8e-06	8.7e-06	13.1	1.2	169	208	82	121	78	131	0.89
YP_002325667.1	acetyl-CoA acetyltransferase(acetoacetyl-CoA thiolase) [Acinetobacter baumannii AB307-0294]	acetyl-CoA acetyltransferase(acetoacetyl-CoA thiolase)	Acinetobacter baumannii AB307-0294	ketoacyl-synt	PF00109.22	Beta-ketoacyl_synthase_N-terminal_domain	253	gi|215483450|ref|YP_002325667.1|	-	390	3.7e-07	17.6	5.6	3	5	0.37	0.56	-2.6	0	82	101	172	191	148	217	0.65
YP_002325667.1	acetyl-CoA acetyltransferase(acetoacetyl-CoA thiolase) [Acinetobacter baumannii AB307-0294]	acetyl-CoA acetyltransferase(acetoacetyl-CoA thiolase)	Acinetobacter baumannii AB307-0294	ketoacyl-synt	PF00109.22	Beta-ketoacyl_synthase_N-terminal_domain	253	gi|215483450|ref|YP_002325667.1|	-	390	3.7e-07	17.6	5.6	4	5	0.17	0.25	-1.5	0	234	251	244	261	229	263	0.71
YP_002325667.1	acetyl-CoA acetyltransferase(acetoacetyl-CoA thiolase) [Acinetobacter baumannii AB307-0294]	acetyl-CoA acetyltransferase(acetoacetyl-CoA thiolase)	Acinetobacter baumannii AB307-0294	ketoacyl-synt	PF00109.22	Beta-ketoacyl_synthase_N-terminal_domain	253	gi|215483450|ref|YP_002325667.1|	-	390	3.7e-07	17.6	5.6	5	5	0.39	0.58	-2.7	0	96	112	295	311	292	350	0.67
YP_002325667.1	acetyl-CoA acetyltransferase(acetoacetyl-CoA thiolase) [Acinetobacter baumannii AB307-0294]	acetyl-CoA acetyltransferase(acetoacetyl-CoA thiolase)	Acinetobacter baumannii AB307-0294	Ketoacyl-synt_C	PF02801.18	Beta-ketoacyl_synthase_C-terminal_domain	118	gi|215483450|ref|YP_002325667.1|	-	390	6.2e-06	14	0.1	1	2	0.00038	0.00056	7.7	0	14	47	20	51	5	53	0.7
YP_002325667.1	acetyl-CoA acetyltransferase(acetoacetyl-CoA thiolase) [Acinetobacter baumannii AB307-0294]	acetyl-CoA acetyltransferase(acetoacetyl-CoA thiolase)	Acinetobacter baumannii AB307-0294	Ketoacyl-synt_C	PF02801.18	Beta-ketoacyl_synthase_C-terminal_domain	118	gi|215483450|ref|YP_002325667.1|	-	390	6.2e-06	14	0.1	2	2	0.015	0.022	2.6	0	27	49	292	314	269	367	0.72
YP_002326039.1	beta-ketoadipyl CoA thiolase [Acinetobacter baumannii AB307-0294]	beta-ketoadipyl CoA thiolase	Acinetobacter baumannii AB307-0294	ketoacyl-synt	PF00109.22	Beta-ketoacyl_synthase_N-terminal_domain	253	gi|215483814|ref|YP_002326039.1|	-	401	2.2e-07	18.4	0.8	1	2	1.8e-07	5.4e-07	17.1	0.2	170	222	84	135	65	143	0.77
YP_002326039.1	beta-ketoadipyl CoA thiolase [Acinetobacter baumannii AB307-0294]	beta-ketoadipyl CoA thiolase	Acinetobacter baumannii AB307-0294	ketoacyl-synt	PF00109.22	Beta-ketoacyl_synthase_N-terminal_domain	253	gi|215483814|ref|YP_002326039.1|	-	401	2.2e-07	18.4	0.8	2	2	0.31	0.92	-3.3	0	89	192	363	377	360	391	0.54
YP_002326095.1	beta-ketoadipyl CoA thiolase [Acinetobacter baumannii AB307-0294]	beta-ketoadipyl CoA thiolase	Acinetobacter baumannii AB307-0294	ketoacyl-synt	PF00109.22	Beta-ketoacyl_synthase_N-terminal_domain	253	gi|215483870|ref|YP_002326095.1|	-	402	9.7e-12	32.6	0	1	1	6.9e-12	2.1e-11	31.6	0	167	222	82	136	78	142	0.85
YP_002326271.1	3-Oxoacyl-[acyl-carrier-protein (ACP)] synthase III family protein [Acinetobacter baumannii AB307-0294]	3-Oxoacyl-acyl-carrier-protein (ACP) synthase III family protein	Acinetobacter baumannii AB307-0294	ketoacyl-synt	PF00109.22	Beta-ketoacyl_synthase_N-terminal_domain	253	gi|215484046|ref|YP_002326271.1|	-	368	4.4e-09	23.9	1.6	1	2	8e-06	2.4e-05	11.7	0	61	111	71	118	2	133	0.68
YP_002326271.1	3-Oxoacyl-[acyl-carrier-protein (ACP)] synthase III family protein [Acinetobacter baumannii AB307-0294]	3-Oxoacyl-acyl-carrier-protein (ACP) synthase III family protein	Acinetobacter baumannii AB307-0294	ketoacyl-synt	PF00109.22	Beta-ketoacyl_synthase_N-terminal_domain	253	gi|215484046|ref|YP_002326271.1|	-	368	4.4e-09	23.9	1.6	2	2	1e-05	3.1e-05	11.3	0.6	154	199	134	179	122	184	0.86
YP_002326649.1	beta-ketoacyl synthase, N-terminal domain protein, partial [Acinetobacter baumannii AB307-0294]	beta-ketoacyl synthase, N-terminal domain protein, partial	Acinetobacter baumannii AB307-0294	ketoacyl-synt	PF00109.22	Beta-ketoacyl_synthase_N-terminal_domain	253	gi|215484416|ref|YP_002326649.1|	-	409	8.1e-44	137.7	1.4	1	1	1.2e-43	1.8e-43	136.6	1.4	1	253	1	244	1	244	0.87
YP_002326649.1	beta-ketoacyl synthase, N-terminal domain protein, partial [Acinetobacter baumannii AB307-0294]	beta-ketoacyl synthase, N-terminal domain protein, partial	Acinetobacter baumannii AB307-0294	Ketoacyl-synt_C	PF02801.18	Beta-ketoacyl_synthase_C-terminal_domain	118	gi|215484416|ref|YP_002326649.1|	-	409	2.7e-35	108.8	0.7	1	1	3.2e-35	4.9e-35	107.9	0.7	1	117	252	364	252	365	0.95
YP_002327112.1	acetyl-CoA C-acyltransferase FadA [Acinetobacter baumannii AB307-0294]	acetyl-CoA C-acyltransferase FadA	Acinetobacter baumannii AB307-0294	ketoacyl-synt	PF00109.22	Beta-ketoacyl_synthase_N-terminal_domain	253	gi|215484873|ref|YP_002327112.1|	-	390	6.6e-07	16.8	0.4	1	4	0.44	1.3	-3.9	0	195	219	8	32	7	36	0.72
YP_002327112.1	acetyl-CoA C-acyltransferase FadA [Acinetobacter baumannii AB307-0294]	acetyl-CoA C-acyltransferase FadA	Acinetobacter baumannii AB307-0294	ketoacyl-synt	PF00109.22	Beta-ketoacyl_synthase_N-terminal_domain	253	gi|215484873|ref|YP_002327112.1|	-	390	6.6e-07	16.8	0.4	2	4	2.2e-07	6.6e-07	16.8	0.4	174	218	94	138	88	155	0.86
YP_002327112.1	acetyl-CoA C-acyltransferase FadA [Acinetobacter baumannii AB307-0294]	acetyl-CoA C-acyltransferase FadA	Acinetobacter baumannii AB307-0294	ketoacyl-synt	PF00109.22	Beta-ketoacyl_synthase_N-terminal_domain	253	gi|215484873|ref|YP_002327112.1|	-	390	6.6e-07	16.8	0.4	3	4	0.11	0.33	-1.9	0.2	173	251	239	258	222	284	0.64
YP_002327112.1	acetyl-CoA C-acyltransferase FadA [Acinetobacter baumannii AB307-0294]	acetyl-CoA C-acyltransferase FadA	Acinetobacter baumannii AB307-0294	ketoacyl-synt	PF00109.22	Beta-ketoacyl_synthase_N-terminal_domain	253	gi|215484873|ref|YP_002327112.1|	-	390	6.6e-07	16.8	0.4	4	4	0.11	0.34	-1.9	0	95	114	291	310	289	346	0.67
YP_002327275.1	Tyrocidine synthetase 3 [Acinetobacter baumannii AB307-0294]	Tyrocidine synthetase 3	Acinetobacter baumannii AB307-0294	Condensation	PF00668.16	Condensation_domain	301	gi|215485034|ref|YP_002327275.1|	-	1319	2.1e-49	155.8	0	1	1	1.4e-49	4.3e-49	154.8	0	7	300	17	305	13	306	0.93
YP_001844768.1	3-oxoacyl-(acyl-carrier-protein) synthase [Acinetobacter baumannii ACICU]	3-oxoacyl-(acyl-carrier-protein) synthase	Acinetobacter baumannii ACICU	ketoacyl-synt	PF00109.22	Beta-ketoacyl_synthase_N-terminal_domain	253	gi|184156429|ref|YP_001844768.1|	-	408	5.3e-44	138.3	1.5	1	1	7.2e-44	1.1e-43	137.3	1.5	1	253	1	244	1	244	0.89
YP_001844768.1	3-oxoacyl-(acyl-carrier-protein) synthase [Acinetobacter baumannii ACICU]	3-oxoacyl-(acyl-carrier-protein) synthase	Acinetobacter baumannii ACICU	Ketoacyl-synt_C	PF02801.18	Beta-ketoacyl_synthase_C-terminal_domain	118	gi|184156429|ref|YP_001844768.1|	-	408	4.6e-35	108	0.3	1	1	6.4e-35	9.6e-35	107	0.3	1	117	252	364	252	365	0.95
YP_001844801.1	non-ribosomal peptide synthetase protein [Acinetobacter baumannii ACICU]	non-ribosomal peptide synthetase protein	Acinetobacter baumannii ACICU	Condensation	PF00668.16	Condensation_domain	301	gi|184156462|ref|YP_001844801.1|	-	1319	1.2e-47	150.1	0	1	1	7.8e-48	2.3e-47	149.1	0	7	300	17	305	13	306	0.93
YP_001844980.1	3-ketoacyl-CoA thiolase [Acinetobacter baumannii ACICU]	3-ketoacyl-CoA thiolase	Acinetobacter baumannii ACICU	ketoacyl-synt	PF00109.22	Beta-ketoacyl_synthase_N-terminal_domain	253	gi|184156641|ref|YP_001844980.1|	-	390	6.6e-07	16.8	0.4	1	4	0.44	1.3	-3.9	0	195	219	8	32	7	36	0.72
YP_001844980.1	3-ketoacyl-CoA thiolase [Acinetobacter baumannii ACICU]	3-ketoacyl-CoA thiolase	Acinetobacter baumannii ACICU	ketoacyl-synt	PF00109.22	Beta-ketoacyl_synthase_N-terminal_domain	253	gi|184156641|ref|YP_001844980.1|	-	390	6.6e-07	16.8	0.4	2	4	2.2e-07	6.6e-07	16.8	0.4	174	218	94	138	88	155	0.86
YP_001844980.1	3-ketoacyl-CoA thiolase [Acinetobacter baumannii ACICU]	3-ketoacyl-CoA thiolase	Acinetobacter baumannii ACICU	ketoacyl-synt	PF00109.22	Beta-ketoacyl_synthase_N-terminal_domain	253	gi|184156641|ref|YP_001844980.1|	-	390	6.6e-07	16.8	0.4	3	4	0.11	0.33	-1.9	0.2	173	251	239	258	222	284	0.64
YP_001844980.1	3-ketoacyl-CoA thiolase [Acinetobacter baumannii ACICU]	3-ketoacyl-CoA thiolase	Acinetobacter baumannii ACICU	ketoacyl-synt	PF00109.22	Beta-ketoacyl_synthase_N-terminal_domain	253	gi|184156641|ref|YP_001844980.1|	-	390	6.6e-07	16.8	0.4	4	4	0.11	0.34	-1.9	0	95	114	291	310	289	346	0.67
YP_001845190.1	3-oxoacyl-(acyl carrier protein) synthase I [Acinetobacter baumannii ACICU]	3-oxoacyl-(acyl carrier protein) synthase I	Acinetobacter baumannii ACICU	ketoacyl-synt	PF00109.22	Beta-ketoacyl_synthase_N-terminal_domain	253	gi|184156851|ref|YP_001845190.1|	-	400	1.3e-24	74.8	0.1	1	1	1.3e-24	2e-24	74.2	0.1	87	250	78	240	52	242	0.83
YP_001845190.1	3-oxoacyl-(acyl carrier protein) synthase I [Acinetobacter baumannii ACICU]	3-oxoacyl-(acyl carrier protein) synthase I	Acinetobacter baumannii ACICU	Ketoacyl-synt_C	PF02801.18	Beta-ketoacyl_synthase_C-terminal_domain	118	gi|184156851|ref|YP_001845190.1|	-	400	2.2e-31	96.1	0.6	1	1	3.5e-31	5.3e-31	94.9	0.6	4	113	246	351	244	357	0.94
YP_001845193.1	3-oxoacyl-(acyl carrier protein) synthase II [Acinetobacter baumannii ACICU]	3-oxoacyl-(acyl carrier protein) synthase II	Acinetobacter baumannii ACICU	ketoacyl-synt	PF00109.22	Beta-ketoacyl_synthase_N-terminal_domain	253	gi|184156854|ref|YP_001845193.1|	-	408	1e-45	143.9	2.7	1	1	1e-45	1.5e-45	143.4	2.7	1	253	1	246	1	246	0.89
YP_001845193.1	3-oxoacyl-(acyl carrier protein) synthase II [Acinetobacter baumannii ACICU]	3-oxoacyl-(acyl carrier protein) synthase II	Acinetobacter baumannii ACICU	Ketoacyl-synt_C	PF02801.18	Beta-ketoacyl_synthase_C-terminal_domain	118	gi|184156854|ref|YP_001845193.1|	-	408	3e-33	102.1	0	1	1	4.7e-33	7e-33	100.9	0	1	117	254	362	254	363	0.96
YP_001845472.1	3-oxoacyl-(acyl-carrier-protein) synthase [Acinetobacter baumannii ACICU]	3-oxoacyl-(acyl-carrier-protein) synthase	Acinetobacter baumannii ACICU	ketoacyl-synt	PF00109.22	Beta-ketoacyl_synthase_N-terminal_domain	253	gi|184157133|ref|YP_001845472.1|	-	409	8.1e-44	137.7	1.4	1	1	1.2e-43	1.8e-43	136.6	1.4	1	253	1	244	1	244	0.87
YP_001845472.1	3-oxoacyl-(acyl-carrier-protein) synthase [Acinetobacter baumannii ACICU]	3-oxoacyl-(acyl-carrier-protein) synthase	Acinetobacter baumannii ACICU	Ketoacyl-synt_C	PF02801.18	Beta-ketoacyl_synthase_C-terminal_domain	118	gi|184157133|ref|YP_001845472.1|	-	409	2.7e-35	108.8	0.7	1	1	3.2e-35	4.9e-35	107.9	0.7	1	117	252	364	252	365	0.95
YP_001845844.1	3-oxoacyl-(acyl carrier protein) synthase III [Acinetobacter baumannii ACICU]	3-oxoacyl-(acyl carrier protein) synthase III	Acinetobacter baumannii ACICU	ketoacyl-synt	PF00109.22	Beta-ketoacyl_synthase_N-terminal_domain	253	gi|184157505|ref|YP_001845844.1|	-	368	4.4e-09	23.9	1.6	1	2	8e-06	2.4e-05	11.7	0	61	111	71	118	2	133	0.68
YP_001845844.1	3-oxoacyl-(acyl carrier protein) synthase III [Acinetobacter baumannii ACICU]	3-oxoacyl-(acyl carrier protein) synthase III	Acinetobacter baumannii ACICU	ketoacyl-synt	PF00109.22	Beta-ketoacyl_synthase_N-terminal_domain	253	gi|184157505|ref|YP_001845844.1|	-	368	4.4e-09	23.9	1.6	2	2	1e-05	3.1e-05	11.3	0.6	154	199	134	179	122	184	0.86
YP_001846003.1	acetyl-CoA acetyltransferase [Acinetobacter baumannii ACICU]	acetyl-CoA acetyltransferase	Acinetobacter baumannii ACICU	ketoacyl-synt	PF00109.22	Beta-ketoacyl_synthase_N-terminal_domain	253	gi|184157664|ref|YP_001846003.1|	-	402	9.8e-12	32.6	0	1	1	6.9e-12	2.1e-11	31.6	0	167	222	82	136	78	142	0.85
YP_001846050.1	acetyl-CoA acetyltransferase [Acinetobacter baumannii ACICU]	acetyl-CoA acetyltransferase	Acinetobacter baumannii ACICU	ketoacyl-synt	PF00109.22	Beta-ketoacyl_synthase_N-terminal_domain	253	gi|184157711|ref|YP_001846050.1|	-	401	2.3e-07	18.3	0.8	1	2	1.8e-07	5.4e-07	17.1	0.2	170	222	84	135	65	143	0.77
YP_001846050.1	acetyl-CoA acetyltransferase [Acinetobacter baumannii ACICU]	acetyl-CoA acetyltransferase	Acinetobacter baumannii ACICU	ketoacyl-synt	PF00109.22	Beta-ketoacyl_synthase_N-terminal_domain	253	gi|184157711|ref|YP_001846050.1|	-	401	2.3e-07	18.3	0.8	2	2	0.31	0.92	-3.3	0	89	192	363	377	360	391	0.54
YP_001846426.1	acetyl-CoA acetyltransferase [Acinetobacter baumannii ACICU]	acetyl-CoA acetyltransferase	Acinetobacter baumannii ACICU	ketoacyl-synt	PF00109.22	Beta-ketoacyl_synthase_N-terminal_domain	253	gi|184158087|ref|YP_001846426.1|	-	390	3.7e-07	17.6	5.6	1	5	0.0022	0.0033	4.7	0	93	137	31	75	26	86	0.8
YP_001846426.1	acetyl-CoA acetyltransferase [Acinetobacter baumannii ACICU]	acetyl-CoA acetyltransferase	Acinetobacter baumannii ACICU	ketoacyl-synt	PF00109.22	Beta-ketoacyl_synthase_N-terminal_domain	253	gi|184158087|ref|YP_001846426.1|	-	390	3.7e-07	17.6	5.6	2	5	5.8e-06	8.7e-06	13.1	1.2	169	208	82	121	78	131	0.89
YP_001846426.1	acetyl-CoA acetyltransferase [Acinetobacter baumannii ACICU]	acetyl-CoA acetyltransferase	Acinetobacter baumannii ACICU	ketoacyl-synt	PF00109.22	Beta-ketoacyl_synthase_N-terminal_domain	253	gi|184158087|ref|YP_001846426.1|	-	390	3.7e-07	17.6	5.6	3	5	0.37	0.56	-2.6	0	82	101	172	191	148	217	0.65
YP_001846426.1	acetyl-CoA acetyltransferase [Acinetobacter baumannii ACICU]	acetyl-CoA acetyltransferase	Acinetobacter baumannii ACICU	ketoacyl-synt	PF00109.22	Beta-ketoacyl_synthase_N-terminal_domain	253	gi|184158087|ref|YP_001846426.1|	-	390	3.7e-07	17.6	5.6	4	5	0.17	0.25	-1.5	0	234	251	244	261	229	263	0.71
YP_001846426.1	acetyl-CoA acetyltransferase [Acinetobacter baumannii ACICU]	acetyl-CoA acetyltransferase	Acinetobacter baumannii ACICU	ketoacyl-synt	PF00109.22	Beta-ketoacyl_synthase_N-terminal_domain	253	gi|184158087|ref|YP_001846426.1|	-	390	3.7e-07	17.6	5.6	5	5	0.39	0.58	-2.7	0	96	112	295	311	292	350	0.67
YP_001846426.1	acetyl-CoA acetyltransferase [Acinetobacter baumannii ACICU]	acetyl-CoA acetyltransferase	Acinetobacter baumannii ACICU	Ketoacyl-synt_C	PF02801.18	Beta-ketoacyl_synthase_C-terminal_domain	118	gi|184158087|ref|YP_001846426.1|	-	390	6.2e-06	14	0.1	1	2	0.00038	0.00056	7.7	0	14	47	20	51	5	53	0.7
YP_001846426.1	acetyl-CoA acetyltransferase [Acinetobacter baumannii ACICU]	acetyl-CoA acetyltransferase	Acinetobacter baumannii ACICU	Ketoacyl-synt_C	PF02801.18	Beta-ketoacyl_synthase_C-terminal_domain	118	gi|184158087|ref|YP_001846426.1|	-	390	6.2e-06	14	0.1	2	2	0.015	0.022	2.6	0	27	49	292	314	269	367	0.72
YP_001846620.1	beta-ketoadipyl CoA thiolase [Acinetobacter baumannii ACICU]	beta-ketoadipyl CoA thiolase	Acinetobacter baumannii ACICU	ketoacyl-synt	PF00109.22	Beta-ketoacyl_synthase_N-terminal_domain	253	gi|184158281|ref|YP_001846620.1|	-	404	4.4e-10	27.2	0.7	1	2	4.8e-10	1.4e-09	25.5	0.2	167	208	82	123	67	142	0.84
YP_001846620.1	beta-ketoadipyl CoA thiolase [Acinetobacter baumannii ACICU]	beta-ketoadipyl CoA thiolase	Acinetobacter baumannii ACICU	ketoacyl-synt	PF00109.22	Beta-ketoacyl_synthase_N-terminal_domain	253	gi|184158281|ref|YP_001846620.1|	-	404	4.4e-10	27.2	0.7	2	2	0.046	0.14	-0.6	0	67	110	241	281	189	332	0.73
YP_001846659.1	beta-ketoadipyl CoA thiolase [Acinetobacter baumannii ACICU]	beta-ketoadipyl CoA thiolase	Acinetobacter baumannii ACICU	ketoacyl-synt	PF00109.22	Beta-ketoacyl_synthase_N-terminal_domain	253	gi|184158320|ref|YP_001846659.1|	-	403	6.1e-10	26.7	0.6	1	2	4.9e-10	1.5e-09	25.5	0.2	167	208	84	125	69	144	0.84
YP_001846659.1	beta-ketoadipyl CoA thiolase [Acinetobacter baumannii ACICU]	beta-ketoadipyl CoA thiolase	Acinetobacter baumannii ACICU	ketoacyl-synt	PF00109.22	Beta-ketoacyl_synthase_N-terminal_domain	253	gi|184158320|ref|YP_001846659.1|	-	403	6.1e-10	26.7	0.6	2	2	0.14	0.41	-2.2	0	80	107	256	280	208	324	0.65
YP_001846913.1	acetyl-CoA acetyltransferase [Acinetobacter baumannii ACICU]	acetyl-CoA acetyltransferase	Acinetobacter baumannii ACICU	ketoacyl-synt	PF00109.22	Beta-ketoacyl_synthase_N-terminal_domain	253	gi|184158574|ref|YP_001846913.1|	-	522	2.6e-07	18.1	0.1	1	1	2.4e-07	7.3e-07	16.7	0.1	166	206	177	217	168	231	0.82
YP_001847238.1	acinetobactin biosynthesis protein [Acinetobacter baumannii ACICU]	acinetobactin biosynthesis protein	Acinetobacter baumannii ACICU	Condensation	PF00668.16	Condensation_domain	301	gi|184158899|ref|YP_001847238.1|	-	949	3.4e-53	168.3	14.2	1	2	1.4e-34	4.1e-34	105.6	1	15	301	6	290	1	290	0.88
YP_001847238.1	acinetobactin biosynthesis protein [Acinetobacter baumannii ACICU]	acinetobactin biosynthesis protein	Acinetobacter baumannii ACICU	Condensation	PF00668.16	Condensation_domain	301	gi|184158899|ref|YP_001847238.1|	-	949	3.4e-53	168.3	14.2	2	2	6.4e-23	1.9e-22	67.3	6.2	6	272	441	695	437	697	0.9
YP_001847246.1	non-ribosomal peptide synthetase module [Acinetobacter baumannii ACICU]	non-ribosomal peptide synthetase module	Acinetobacter baumannii ACICU	Condensation	PF00668.16	Condensation_domain	301	gi|184158907|ref|YP_001847246.1|	-	698	2.3e-47	149.2	13.7	1	2	7e-05	0.00021	8.1	3.2	14	160	21	160	12	213	0.78
YP_001847246.1	non-ribosomal peptide synthetase module [Acinetobacter baumannii ACICU]	non-ribosomal peptide synthetase module	Acinetobacter baumannii ACICU	Condensation	PF00668.16	Condensation_domain	301	gi|184158907|ref|YP_001847246.1|	-	698	2.3e-47	149.2	13.7	2	2	4.6e-47	1.4e-46	146.6	2.9	3	299	275	567	273	569	0.9
YP_001847685.1	bifunctional protein wax ester synthase/acyl-CoA diacylglycerol acyltransferase [Acinetobacter baumannii ACICU]	bifunctional protein wax ester synthase/acyl-CoA diacylglycerol acyltransferase	Acinetobacter baumannii ACICU	Condensation	PF00668.16	Condensation_domain	301	gi|184159346|ref|YP_001847685.1|	-	461	1e-09	25.5	0.2	1	2	5.8e-07	1.7e-06	14.9	0.1	82	154	79	151	67	175	0.72
YP_001847685.1	bifunctional protein wax ester synthase/acyl-CoA diacylglycerol acyltransferase [Acinetobacter baumannii ACICU]	bifunctional protein wax ester synthase/acyl-CoA diacylglycerol acyltransferase	Acinetobacter baumannii ACICU	Condensation	PF00668.16	Condensation_domain	301	gi|184159346|ref|YP_001847685.1|	-	461	1e-09	25.5	0.2	2	2	5.3e-05	0.00016	8.5	0	224	261	237	274	205	309	0.8
YP_001847750.1	acetyl-CoA acetyltransferase [Acinetobacter baumannii ACICU]	acetyl-CoA acetyltransferase	Acinetobacter baumannii ACICU	ketoacyl-synt	PF00109.22	Beta-ketoacyl_synthase_N-terminal_domain	253	gi|184159411|ref|YP_001847750.1|	-	391	3.3e-08	21	6.9	1	4	0.00096	0.0029	4.9	0	91	127	29	65	26	85	0.77
YP_001847750.1	acetyl-CoA acetyltransferase [Acinetobacter baumannii ACICU]	acetyl-CoA acetyltransferase	Acinetobacter baumannii ACICU	ketoacyl-synt	PF00109.22	Beta-ketoacyl_synthase_N-terminal_domain	253	gi|184159411|ref|YP_001847750.1|	-	391	3.3e-08	21	6.9	2	4	7e-08	2.1e-07	18.4	1.3	169	208	82	121	76	136	0.87
YP_001847750.1	acetyl-CoA acetyltransferase [Acinetobacter baumannii ACICU]	acetyl-CoA acetyltransferase	Acinetobacter baumannii ACICU	ketoacyl-synt	PF00109.22	Beta-ketoacyl_synthase_N-terminal_domain	253	gi|184159411|ref|YP_001847750.1|	-	391	3.3e-08	21	6.9	3	4	0.25	0.74	-3	0	113	136	151	174	145	198	0.56
YP_001847750.1	acetyl-CoA acetyltransferase [Acinetobacter baumannii ACICU]	acetyl-CoA acetyltransferase	Acinetobacter baumannii ACICU	ketoacyl-synt	PF00109.22	Beta-ketoacyl_synthase_N-terminal_domain	253	gi|184159411|ref|YP_001847750.1|	-	391	3.3e-08	21	6.9	4	4	0.22	0.66	-2.8	0.1	233	251	243	261	233	263	0.67
YP_001847759.1	acetyl-CoA acetyltransferase [Acinetobacter baumannii ACICU]	acetyl-CoA acetyltransferase	Acinetobacter baumannii ACICU	ketoacyl-synt	PF00109.22	Beta-ketoacyl_synthase_N-terminal_domain	253	gi|184159420|ref|YP_001847759.1|	-	401	4.3e-10	27.3	0.1	1	2	1.2e-09	3.7e-09	24.2	0	175	206	91	122	73	145	0.92
YP_001847759.1	acetyl-CoA acetyltransferase [Acinetobacter baumannii ACICU]	acetyl-CoA acetyltransferase	Acinetobacter baumannii ACICU	ketoacyl-synt	PF00109.22	Beta-ketoacyl_synthase_N-terminal_domain	253	gi|184159420|ref|YP_001847759.1|	-	401	4.3e-10	27.3	0.1	2	2	0.028	0.085	0.1	0	95	114	304	323	292	364	0.81
YP_001083175.1	beta-ketoacyl-ACP synthase I [Acinetobacter baumannii ATCC 17978]	beta-ketoacyl-ACP synthase I	Acinetobacter baumannii ATCC 17978	ketoacyl-synt	PF00109.22	Beta-ketoacyl_synthase_N-terminal_domain	253	gi|126640191|ref|YP_001083175.1|	-	400	9.7e-39	121.1	1.3	1	1	1.3e-38	1.9e-38	120.1	1.3	9	253	1	236	1	236	0.88
YP_001083175.1	beta-ketoacyl-ACP synthase I [Acinetobacter baumannii ATCC 17978]	beta-ketoacyl-ACP synthase I	Acinetobacter baumannii ATCC 17978	Ketoacyl-synt_C	PF02801.18	Beta-ketoacyl_synthase_C-terminal_domain	118	gi|126640191|ref|YP_001083175.1|	-	400	4.7e-35	108	0.2	1	1	6.8e-35	1e-34	106.9	0.2	1	117	244	356	244	357	0.95
YP_001083204.1	amino acid adenylation [Acinetobacter baumannii ATCC 17978]	amino acid adenylation	Acinetobacter baumannii ATCC 17978	Condensation	PF00668.16	Condensation_domain	301	gi|126640220|ref|YP_001083204.1|	-	1281	1.4e-45	143.3	0	1	1	1e-45	3.1e-45	142.2	0	48	300	21	267	18	268	0.95
YP_001083375.1	3-ketoacyl-CoA thiolase [Acinetobacter baumannii ATCC 17978]	3-ketoacyl-CoA thiolase	Acinetobacter baumannii ATCC 17978	ketoacyl-synt	PF00109.22	Beta-ketoacyl_synthase_N-terminal_domain	253	gi|126640391|ref|YP_001083375.1|	-	365	6e-07	16.9	0.4	1	3	2e-07	6e-07	16.9	0.4	174	218	69	113	63	130	0.86
YP_001083375.1	3-ketoacyl-CoA thiolase [Acinetobacter baumannii ATCC 17978]	3-ketoacyl-CoA thiolase	Acinetobacter baumannii ATCC 17978	ketoacyl-synt	PF00109.22	Beta-ketoacyl_synthase_N-terminal_domain	253	gi|126640391|ref|YP_001083375.1|	-	365	6e-07	16.9	0.4	2	3	0.099	0.3	-1.7	0.1	173	251	214	233	196	259	0.64
YP_001083375.1	3-ketoacyl-CoA thiolase [Acinetobacter baumannii ATCC 17978]	3-ketoacyl-CoA thiolase	Acinetobacter baumannii ATCC 17978	ketoacyl-synt	PF00109.22	Beta-ketoacyl_synthase_N-terminal_domain	253	gi|126640391|ref|YP_001083375.1|	-	365	6e-07	16.9	0.4	3	3	0.1	0.31	-1.8	0	95	114	266	285	264	322	0.66
YP_001083577.1	3-oxoacyl-ACP synthase [Acinetobacter baumannii ATCC 17978]	3-oxoacyl-ACP synthase	Acinetobacter baumannii ATCC 17978	ketoacyl-synt	PF00109.22	Beta-ketoacyl_synthase_N-terminal_domain	253	gi|126640593|ref|YP_001083577.1|	-	344	4e-24	73.2	0.1	1	1	4.1e-24	6.1e-24	72.6	0.1	89	250	24	184	4	186	0.84
YP_001083577.1	3-oxoacyl-ACP synthase [Acinetobacter baumannii ATCC 17978]	3-oxoacyl-ACP synthase	Acinetobacter baumannii ATCC 17978	Ketoacyl-synt_C	PF02801.18	Beta-ketoacyl_synthase_C-terminal_domain	118	gi|126640593|ref|YP_001083577.1|	-	344	8.2e-31	94.3	1	1	2	0.87	1.3	-3.1	0	60	80	36	54	35	61	0.69
YP_001083577.1	3-oxoacyl-ACP synthase [Acinetobacter baumannii ATCC 17978]	3-oxoacyl-ACP synthase	Acinetobacter baumannii ATCC 17978	Ketoacyl-synt_C	PF02801.18	Beta-ketoacyl_synthase_C-terminal_domain	118	gi|126640593|ref|YP_001083577.1|	-	344	8.2e-31	94.3	1	2	2	7.4e-31	1.1e-30	93.9	0.3	4	113	190	295	188	301	0.93
YP_001083580.1	3-oxoacyl-(acyl carrier protein) synthase II [Acinetobacter baumannii ATCC 17978]	3-oxoacyl-(acyl carrier protein) synthase II	Acinetobacter baumannii ATCC 17978	ketoacyl-synt	PF00109.22	Beta-ketoacyl_synthase_N-terminal_domain	253	gi|126640596|ref|YP_001083580.1|	-	373	6.8e-37	115	1.7	1	1	6.9e-37	1e-36	114.4	1.7	43	253	4	211	1	211	0.86
YP_001083580.1	3-oxoacyl-(acyl carrier protein) synthase II [Acinetobacter baumannii ATCC 17978]	3-oxoacyl-(acyl carrier protein) synthase II	Acinetobacter baumannii ATCC 17978	Ketoacyl-synt_C	PF02801.18	Beta-ketoacyl_synthase_C-terminal_domain	118	gi|126640596|ref|YP_001083580.1|	-	373	2.5e-33	102.4	0	1	1	4e-33	5.9e-33	101.2	0	1	117	219	327	219	328	0.96
YP_001083897.1	beta-ketoacyl-ACP synthase I [Acinetobacter baumannii ATCC 17978]	beta-ketoacyl-ACP synthase I	Acinetobacter baumannii ATCC 17978	ketoacyl-synt	PF00109.22	Beta-ketoacyl_synthase_N-terminal_domain	253	gi|126640913|ref|YP_001083897.1|	-	274	3.6e-26	79.9	0.6	1	3	2.4e-26	3.6e-26	79.9	0.6	150	253	1	109	1	109	0.93
YP_001083897.1	beta-ketoacyl-ACP synthase I [Acinetobacter baumannii ATCC 17978]	beta-ketoacyl-ACP synthase I	Acinetobacter baumannii ATCC 17978	ketoacyl-synt	PF00109.22	Beta-ketoacyl_synthase_N-terminal_domain	253	gi|126640913|ref|YP_001083897.1|	-	274	3.6e-26	79.9	0.6	2	3	0.44	0.67	-2.9	0.1	152	171	115	134	113	151	0.58
YP_001083897.1	beta-ketoacyl-ACP synthase I [Acinetobacter baumannii ATCC 17978]	beta-ketoacyl-ACP synthase I	Acinetobacter baumannii ATCC 17978	ketoacyl-synt	PF00109.22	Beta-ketoacyl_synthase_N-terminal_domain	253	gi|126640913|ref|YP_001083897.1|	-	274	3.6e-26	79.9	0.6	3	3	0.71	1.1	-3.5	0	94	124	178	208	176	226	0.67
YP_001083897.1	beta-ketoacyl-ACP synthase I [Acinetobacter baumannii ATCC 17978]	beta-ketoacyl-ACP synthase I	Acinetobacter baumannii ATCC 17978	Ketoacyl-synt_C	PF02801.18	Beta-ketoacyl_synthase_C-terminal_domain	118	gi|126640913|ref|YP_001083897.1|	-	274	1.3e-35	109.7	0.7	1	1	1.4e-35	2.1e-35	109.1	0.7	1	117	117	229	117	230	0.95
YP_001084240.1	3-oxoacyl-ACP synthase [Acinetobacter baumannii ATCC 17978]	3-oxoacyl-ACP synthase	Acinetobacter baumannii ATCC 17978	ketoacyl-synt	PF00109.22	Beta-ketoacyl_synthase_N-terminal_domain	253	gi|126641256|ref|YP_001084240.1|	-	339	4.9e-09	23.8	1.5	1	2	1.1e-05	3.3e-05	11.2	0	63	111	44	89	9	106	0.73
YP_001084240.1	3-oxoacyl-ACP synthase [Acinetobacter baumannii ATCC 17978]	3-oxoacyl-ACP synthase	Acinetobacter baumannii ATCC 17978	ketoacyl-synt	PF00109.22	Beta-ketoacyl_synthase_N-terminal_domain	253	gi|126641256|ref|YP_001084240.1|	-	339	4.9e-09	23.8	1.5	2	2	8.6e-06	2.6e-05	11.6	0.6	154	199	105	150	93	159	0.86
YP_001084374.1	thiolase [Acinetobacter baumannii ATCC 17978]	thiolase	Acinetobacter baumannii ATCC 17978	ketoacyl-synt	PF00109.22	Beta-ketoacyl_synthase_N-terminal_domain	253	gi|126641390|ref|YP_001084374.1|	-	333	7.6e-12	33	0.1	1	1	5.5e-12	1.6e-11	31.9	0.1	167	222	13	67	11	73	0.85
YP_001084758.1	acetyl-CoA acetyltransferase [Acinetobacter baumannii ATCC 17978]	acetyl-CoA acetyltransferase	Acinetobacter baumannii ATCC 17978	ketoacyl-synt	PF00109.22	Beta-ketoacyl_synthase_N-terminal_domain	253	gi|126641774|ref|YP_001084758.1|	-	321	1.9e-06	15.3	2.8	1	4	1.3e-06	3.9e-06	14.3	0.3	169	208	13	52	11	62	0.89
YP_001084758.1	acetyl-CoA acetyltransferase [Acinetobacter baumannii ATCC 17978]	acetyl-CoA acetyltransferase	Acinetobacter baumannii ATCC 17978	ketoacyl-synt	PF00109.22	Beta-ketoacyl_synthase_N-terminal_domain	253	gi|126641774|ref|YP_001084758.1|	-	321	1.9e-06	15.3	2.8	2	4	0.13	0.4	-2.1	0	82	100	103	121	77	144	0.62
YP_001084758.1	acetyl-CoA acetyltransferase [Acinetobacter baumannii ATCC 17978]	acetyl-CoA acetyltransferase	Acinetobacter baumannii ATCC 17978	ketoacyl-synt	PF00109.22	Beta-ketoacyl_synthase_N-terminal_domain	253	gi|126641774|ref|YP_001084758.1|	-	321	1.9e-06	15.3	2.8	3	4	0.066	0.2	-1.1	0	234	251	175	192	160	194	0.71
YP_001084758.1	acetyl-CoA acetyltransferase [Acinetobacter baumannii ATCC 17978]	acetyl-CoA acetyltransferase	Acinetobacter baumannii ATCC 17978	ketoacyl-synt	PF00109.22	Beta-ketoacyl_synthase_N-terminal_domain	253	gi|126641774|ref|YP_001084758.1|	-	321	1.9e-06	15.3	2.8	4	4	0.14	0.43	-2.2	0	97	112	227	242	223	282	0.65
YP_001085091.1	acetyl-CoA acetyltransferase [Acinetobacter baumannii ATCC 17978]	acetyl-CoA acetyltransferase	Acinetobacter baumannii ATCC 17978	ketoacyl-synt	PF00109.22	Beta-ketoacyl_synthase_N-terminal_domain	253	gi|126642107|ref|YP_001085091.1|	-	429	2.2e-07	18.4	0.1	1	1	1.9e-07	5.6e-07	17	0.1	166	206	84	124	75	138	0.82
YP_001085155.1	aconitate hydratase 2 [Acinetobacter baumannii ATCC 17978]	aconitate hydratase 2	Acinetobacter baumannii ATCC 17978	Ketoacyl-synt_C	PF02801.18	Beta-ketoacyl_synthase_C-terminal_domain	118	gi|126642171|ref|YP_001085155.1|	-	246	7.1e-06	13.8	0	1	1	5.7e-06	1.7e-05	12.6	0	57	94	61	96	59	104	0.88
YP_001085403.1	BasD [Acinetobacter baumannii ATCC 17978]	BasD	Acinetobacter baumannii ATCC 17978	Condensation	PF00668.16	Condensation_domain	301	gi|126642419|ref|YP_001085403.1|	-	323	1.7e-36	113.4	0.5	1	1	6.6e-37	2e-36	113.2	0.5	6	301	3	296	1	296	0.9
YP_001085404.1	acinetobactin biosynthesis protein [Acinetobacter baumannii ATCC 17978]	acinetobactin biosynthesis protein	Acinetobacter baumannii ATCC 17978	Condensation	PF00668.16	Condensation_domain	301	gi|126642420|ref|YP_001085404.1|	-	589	1.9e-24	73.9	5.3	1	1	1.3e-24	3.9e-24	72.9	5.3	6	272	81	335	77	337	0.9
YP_001085411.1	acinetobactin biosynthesis protein [Acinetobacter baumannii ATCC 17978]	acinetobactin biosynthesis protein	Acinetobacter baumannii ATCC 17978	Condensation	PF00668.16	Condensation_domain	301	gi|126642427|ref|YP_001085411.1|	-	675	2.5e-49	155.6	5.1	1	2	2.5e-06	7.6e-06	12.8	0.2	34	140	18	118	5	169	0.85
YP_001085411.1	acinetobactin biosynthesis protein [Acinetobacter baumannii ATCC 17978]	acinetobactin biosynthesis protein	Acinetobacter baumannii ATCC 17978	Condensation	PF00668.16	Condensation_domain	301	gi|126642427|ref|YP_001085411.1|	-	675	2.5e-49	155.6	5.1	2	2	1.8e-46	5.5e-46	144.6	1	3	299	252	544	250	546	0.9
YP_001085594.1	nonribosomal peptide synthetase [Acinetobacter baumannii ATCC 17978]	nonribosomal peptide synthetase	Acinetobacter baumannii ATCC 17978	Condensation	PF00668.16	Condensation_domain	301	gi|126642610|ref|YP_001085594.1|	-	1007	5.4e-49	154.5	13.6	1	2	5.1e-17	1.5e-16	47.9	1.9	31	266	16	253	1	265	0.75
YP_001085594.1	nonribosomal peptide synthetase [Acinetobacter baumannii ATCC 17978]	nonribosomal peptide synthetase	Acinetobacter baumannii ATCC 17978	Condensation	PF00668.16	Condensation_domain	301	gi|126642610|ref|YP_001085594.1|	-	1007	5.4e-49	154.5	13.6	2	2	2.2e-36	6.7e-36	111.5	4.2	5	299	544	842	541	844	0.89
YP_001085596.1	non-ribosomal peptide synthetase [Acinetobacter baumannii ATCC 17978]	non-ribosomal peptide synthetase	Acinetobacter baumannii ATCC 17978	Condensation	PF00668.16	Condensation_domain	301	gi|126642612|ref|YP_001085596.1|	-	627	9.1e-25	74.9	5	1	2	3e-25	9.1e-25	74.9	5	32	275	4	245	1	254	0.83
YP_001085596.1	non-ribosomal peptide synthetase [Acinetobacter baumannii ATCC 17978]	non-ribosomal peptide synthetase	Acinetobacter baumannii ATCC 17978	Condensation	PF00668.16	Condensation_domain	301	gi|126642612|ref|YP_001085596.1|	-	627	9.1e-25	74.9	5	2	2	0.22	0.67	-3.4	0	7	51	423	466	422	479	0.8
YP_001085597.1	non-ribosomal peptide synthetase [Acinetobacter baumannii ATCC 17978]	non-ribosomal peptide synthetase	Acinetobacter baumannii ATCC 17978	Condensation	PF00668.16	Condensation_domain	301	gi|126642613|ref|YP_001085597.1|	-	796	7.8e-37	114.6	6.2	1	3	2.6e-37	7.8e-37	114.6	6.2	3	298	64	355	63	358	0.88
YP_001085597.1	non-ribosomal peptide synthetase [Acinetobacter baumannii ATCC 17978]	non-ribosomal peptide synthetase	Acinetobacter baumannii ATCC 17978	Condensation	PF00668.16	Condensation_domain	301	gi|126642613|ref|YP_001085597.1|	-	796	7.8e-37	114.6	6.2	2	3	0.3	0.9	-3.8	0.1	132	168	474	507	471	510	0.65
YP_001085597.1	non-ribosomal peptide synthetase [Acinetobacter baumannii ATCC 17978]	non-ribosomal peptide synthetase	Acinetobacter baumannii ATCC 17978	Condensation	PF00668.16	Condensation_domain	301	gi|126642613|ref|YP_001085597.1|	-	796	7.8e-37	114.6	6.2	3	3	0.047	0.14	-1.2	0	248	283	737	770	735	774	0.86
YP_001085790.1	hypothetical protein A1S_2776 [Acinetobacter baumannii ATCC 17978]	hypothetical protein A1S_2776	Acinetobacter baumannii ATCC 17978	Condensation	PF00668.16	Condensation_domain	301	gi|126642806|ref|YP_001085790.1|	-	436	5.9e-10	26.3	0.1	1	2	3.7e-07	1.1e-06	15.6	0.1	82	157	54	129	42	156	0.73
YP_001085790.1	hypothetical protein A1S_2776 [Acinetobacter baumannii ATCC 17978]	hypothetical protein A1S_2776	Acinetobacter baumannii ATCC 17978	Condensation	PF00668.16	Condensation_domain	301	gi|126642806|ref|YP_001085790.1|	-	436	5.9e-10	26.3	0.1	2	2	4.6e-05	0.00014	8.7	0	224	261	212	249	180	285	0.79
YP_001085850.1	acetyl-CoA acetyltransferase [Acinetobacter baumannii ATCC 17978]	acetyl-CoA acetyltransferase	Acinetobacter baumannii ATCC 17978	ketoacyl-synt	PF00109.22	Beta-ketoacyl_synthase_N-terminal_domain	253	gi|126642866|ref|YP_001085850.1|	-	339	1.8e-07	18.7	1.3	1	3	5.9e-08	1.8e-07	18.7	1.3	169	208	30	69	25	82	0.87
YP_001085850.1	acetyl-CoA acetyltransferase [Acinetobacter baumannii ATCC 17978]	acetyl-CoA acetyltransferase	Acinetobacter baumannii ATCC 17978	ketoacyl-synt	PF00109.22	Beta-ketoacyl_synthase_N-terminal_domain	253	gi|126642866|ref|YP_001085850.1|	-	339	1.8e-07	18.7	1.3	2	3	0.15	0.45	-2.3	0	111	136	97	122	72	145	0.67
YP_001085850.1	acetyl-CoA acetyltransferase [Acinetobacter baumannii ATCC 17978]	acetyl-CoA acetyltransferase	Acinetobacter baumannii ATCC 17978	ketoacyl-synt	PF00109.22	Beta-ketoacyl_synthase_N-terminal_domain	253	gi|126642866|ref|YP_001085850.1|	-	339	1.8e-07	18.7	1.3	3	3	0.18	0.55	-2.6	0.1	233	251	191	209	181	211	0.67
YP_001712599.1	acetyl-CoA acetyltransferase [Acinetobacter baumannii AYE]	acetyl-CoA acetyltransferase	Acinetobacter baumannii AYE	ketoacyl-synt	PF00109.22	Beta-ketoacyl_synthase_N-terminal_domain	253	gi|169794806|ref|YP_001712599.1|	-	422	4.7e-10	27.1	0.2	1	2	1.3e-09	4e-09	24.1	0.1	175	206	112	143	94	165	0.93
YP_001712599.1	acetyl-CoA acetyltransferase [Acinetobacter baumannii AYE]	acetyl-CoA acetyltransferase	Acinetobacter baumannii AYE	ketoacyl-synt	PF00109.22	Beta-ketoacyl_synthase_N-terminal_domain	253	gi|169794806|ref|YP_001712599.1|	-	422	4.7e-10	27.1	0.2	2	2	0.032	0.097	-0.1	0	95	114	325	344	316	385	0.81
YP_001712608.1	acetyl-CoA acetyltransferase (acetoacetyl-CoA thiolase) [Acinetobacter baumannii AYE]	acetyl-CoA acetyltransferase (acetoacetyl-CoA thiolase)	Acinetobacter baumannii AYE	ketoacyl-synt	PF00109.22	Beta-ketoacyl_synthase_N-terminal_domain	253	gi|169794815|ref|YP_001712608.1|	-	391	3.3e-08	21	6.9	1	4	0.00096	0.0029	4.9	0	91	127	29	65	26	85	0.77
YP_001712608.1	acetyl-CoA acetyltransferase (acetoacetyl-CoA thiolase) [Acinetobacter baumannii AYE]	acetyl-CoA acetyltransferase (acetoacetyl-CoA thiolase)	Acinetobacter baumannii AYE	ketoacyl-synt	PF00109.22	Beta-ketoacyl_synthase_N-terminal_domain	253	gi|169794815|ref|YP_001712608.1|	-	391	3.3e-08	21	6.9	2	4	7e-08	2.1e-07	18.4	1.3	169	208	82	121	76	136	0.87
YP_001712608.1	acetyl-CoA acetyltransferase (acetoacetyl-CoA thiolase) [Acinetobacter baumannii AYE]	acetyl-CoA acetyltransferase (acetoacetyl-CoA thiolase)	Acinetobacter baumannii AYE	ketoacyl-synt	PF00109.22	Beta-ketoacyl_synthase_N-terminal_domain	253	gi|169794815|ref|YP_001712608.1|	-	391	3.3e-08	21	6.9	3	4	0.25	0.74	-3	0	113	136	151	174	145	198	0.56
YP_001712608.1	acetyl-CoA acetyltransferase (acetoacetyl-CoA thiolase) [Acinetobacter baumannii AYE]	acetyl-CoA acetyltransferase (acetoacetyl-CoA thiolase)	Acinetobacter baumannii AYE	ketoacyl-synt	PF00109.22	Beta-ketoacyl_synthase_N-terminal_domain	253	gi|169794815|ref|YP_001712608.1|	-	391	3.3e-08	21	6.9	4	4	0.22	0.66	-2.8	0.1	233	251	243	261	233	263	0.67
YP_001712672.1	bifunctional wax ester synthase / acyl-CoA:diacylglycerol acyltransferase [Acinetobacter baumannii AYE]	bifunctional wax ester synthase / acyl-CoA:diacylglycerol acyltransferase	Acinetobacter baumannii AYE	Condensation	PF00668.16	Condensation_domain	301	gi|169794879|ref|YP_001712672.1|	-	461	6.7e-10	26.1	0.1	1	2	4e-07	1.2e-06	15.4	0.1	82	157	79	154	67	181	0.73
YP_001712672.1	bifunctional wax ester synthase / acyl-CoA:diacylglycerol acyltransferase [Acinetobacter baumannii AYE]	bifunctional wax ester synthase / acyl-CoA:diacylglycerol acyltransferase	Acinetobacter baumannii AYE	Condensation	PF00668.16	Condensation_domain	301	gi|169794879|ref|YP_001712672.1|	-	461	6.7e-10	26.1	0.1	2	2	4.9e-05	0.00015	8.6	0	224	261	237	274	205	310	0.79
YP_001713020.1	non-ribosomal peptide synthase [Acinetobacter baumannii AYE]	non-ribosomal peptide synthase	Acinetobacter baumannii AYE	Condensation	PF00668.16	Condensation_domain	301	gi|169795227|ref|YP_001713020.1|	-	705	2.3e-49	155.7	9.1	1	2	6.5e-07	1.9e-06	14.8	0.6	33	139	46	146	19	184	0.8
YP_001713020.1	non-ribosomal peptide synthase [Acinetobacter baumannii AYE]	non-ribosomal peptide synthase	Acinetobacter baumannii AYE	Condensation	PF00668.16	Condensation_domain	301	gi|169795227|ref|YP_001713020.1|	-	705	2.3e-49	155.7	9.1	2	2	1.4e-46	4.2e-46	145	2.3	3	299	282	574	280	576	0.9
YP_001713027.1	non-ribosomal peptide synthase [Acinetobacter baumannii AYE]	non-ribosomal peptide synthase	Acinetobacter baumannii AYE	Condensation	PF00668.16	Condensation_domain	301	gi|169795234|ref|YP_001713027.1|	-	980	2.6e-56	178.5	12.5	1	2	1.9e-36	5.8e-36	111.7	0.7	4	301	26	321	23	321	0.89
YP_001713027.1	non-ribosomal peptide synthase [Acinetobacter baumannii AYE]	non-ribosomal peptide synthase	Acinetobacter baumannii AYE	Condensation	PF00668.16	Condensation_domain	301	gi|169795234|ref|YP_001713027.1|	-	980	2.6e-56	178.5	12.5	2	2	4.7e-24	1.4e-23	71	5.2	6	272	472	726	468	728	0.9
YP_001713415.1	acetyl-CoA acetyltransferase [Acinetobacter baumannii AYE]	acetyl-CoA acetyltransferase	Acinetobacter baumannii AYE	ketoacyl-synt	PF00109.22	Beta-ketoacyl_synthase_N-terminal_domain	253	gi|169795622|ref|YP_001713415.1|	-	429	2.2e-07	18.4	0.1	1	1	1.9e-07	5.6e-07	17	0.1	166	206	84	124	75	138	0.82
YP_001713567.1	beta-ketoadipyl CoA thiolase [Acinetobacter baumannii AYE]	beta-ketoadipyl CoA thiolase	Acinetobacter baumannii AYE	ketoacyl-synt	PF00109.22	Beta-ketoacyl_synthase_N-terminal_domain	253	gi|169795774|ref|YP_001713567.1|	-	403	7.5e-10	26.4	0.6	1	2	4.9e-10	1.5e-09	25.5	0.2	167	208	84	125	69	144	0.84
YP_001713567.1	beta-ketoadipyl CoA thiolase [Acinetobacter baumannii AYE]	beta-ketoadipyl CoA thiolase	Acinetobacter baumannii AYE	ketoacyl-synt	PF00109.22	Beta-ketoacyl_synthase_N-terminal_domain	253	gi|169795774|ref|YP_001713567.1|	-	403	7.5e-10	26.4	0.6	2	2	0.38	1.1	-3.6	0	88	107	261	280	234	295	0.6
YP_001713606.1	beta-ketoadipyl CoA thiolase [Acinetobacter baumannii AYE]	beta-ketoadipyl CoA thiolase	Acinetobacter baumannii AYE	ketoacyl-synt	PF00109.22	Beta-ketoacyl_synthase_N-terminal_domain	253	gi|169795813|ref|YP_001713606.1|	-	404	8e-10	26.3	0.7	1	2	5e-10	1.5e-09	25.5	0.2	167	208	82	123	67	142	0.84
YP_001713606.1	beta-ketoadipyl CoA thiolase [Acinetobacter baumannii AYE]	beta-ketoadipyl CoA thiolase	Acinetobacter baumannii AYE	ketoacyl-synt	PF00109.22	Beta-ketoacyl_synthase_N-terminal_domain	253	gi|169795813|ref|YP_001713606.1|	-	404	8e-10	26.3	0.7	2	2	0.34	1	-3.5	0	87	105	258	276	225	291	0.59
YP_001713786.1	acetyl-CoA acetyltransferase (acetoacetyl-CoA thiolase) [Acinetobacter baumannii AYE]	acetyl-CoA acetyltransferase (acetoacetyl-CoA thiolase)	Acinetobacter baumannii AYE	ketoacyl-synt	PF00109.22	Beta-ketoacyl_synthase_N-terminal_domain	253	gi|169795993|ref|YP_001713786.1|	-	390	3.7e-07	17.6	5.6	1	5	0.0022	0.0033	4.7	0	93	137	31	75	26	86	0.8
YP_001713786.1	acetyl-CoA acetyltransferase (acetoacetyl-CoA thiolase) [Acinetobacter baumannii AYE]	acetyl-CoA acetyltransferase (acetoacetyl-CoA thiolase)	Acinetobacter baumannii AYE	ketoacyl-synt	PF00109.22	Beta-ketoacyl_synthase_N-terminal_domain	253	gi|169795993|ref|YP_001713786.1|	-	390	3.7e-07	17.6	5.6	2	5	5.8e-06	8.7e-06	13.1	1.2	169	208	82	121	78	131	0.89
YP_001713786.1	acetyl-CoA acetyltransferase (acetoacetyl-CoA thiolase) [Acinetobacter baumannii AYE]	acetyl-CoA acetyltransferase (acetoacetyl-CoA thiolase)	Acinetobacter baumannii AYE	ketoacyl-synt	PF00109.22	Beta-ketoacyl_synthase_N-terminal_domain	253	gi|169795993|ref|YP_001713786.1|	-	390	3.7e-07	17.6	5.6	3	5	0.37	0.56	-2.6	0	82	101	172	191	148	217	0.65
YP_001713786.1	acetyl-CoA acetyltransferase (acetoacetyl-CoA thiolase) [Acinetobacter baumannii AYE]	acetyl-CoA acetyltransferase (acetoacetyl-CoA thiolase)	Acinetobacter baumannii AYE	ketoacyl-synt	PF00109.22	Beta-ketoacyl_synthase_N-terminal_domain	253	gi|169795993|ref|YP_001713786.1|	-	390	3.7e-07	17.6	5.6	4	5	0.17	0.25	-1.5	0	234	251	244	261	229	263	0.71
YP_001713786.1	acetyl-CoA acetyltransferase (acetoacetyl-CoA thiolase) [Acinetobacter baumannii AYE]	acetyl-CoA acetyltransferase (acetoacetyl-CoA thiolase)	Acinetobacter baumannii AYE	ketoacyl-synt	PF00109.22	Beta-ketoacyl_synthase_N-terminal_domain	253	gi|169795993|ref|YP_001713786.1|	-	390	3.7e-07	17.6	5.6	5	5	0.39	0.58	-2.7	0	96	112	295	311	292	350	0.67
YP_001713786.1	acetyl-CoA acetyltransferase (acetoacetyl-CoA thiolase) [Acinetobacter baumannii AYE]	acetyl-CoA acetyltransferase (acetoacetyl-CoA thiolase)	Acinetobacter baumannii AYE	Ketoacyl-synt_C	PF02801.18	Beta-ketoacyl_synthase_C-terminal_domain	118	gi|169795993|ref|YP_001713786.1|	-	390	6.2e-06	14	0.1	1	2	0.00038	0.00056	7.7	0	14	47	20	51	5	53	0.7
YP_001713786.1	acetyl-CoA acetyltransferase (acetoacetyl-CoA thiolase) [Acinetobacter baumannii AYE]	acetyl-CoA acetyltransferase (acetoacetyl-CoA thiolase)	Acinetobacter baumannii AYE	Ketoacyl-synt_C	PF02801.18	Beta-ketoacyl_synthase_C-terminal_domain	118	gi|169795993|ref|YP_001713786.1|	-	390	6.2e-06	14	0.1	2	2	0.015	0.022	2.6	0	27	49	292	314	269	367	0.72
YP_001714146.1	acetyl-CoA acetyltransferase [Acinetobacter baumannii AYE]	acetyl-CoA acetyltransferase	Acinetobacter baumannii AYE	ketoacyl-synt	PF00109.22	Beta-ketoacyl_synthase_N-terminal_domain	253	gi|169796353|ref|YP_001714146.1|	-	401	2.2e-07	18.4	0.8	1	2	1.8e-07	5.4e-07	17.1	0.2	170	222	84	135	65	143	0.77
YP_001714146.1	acetyl-CoA acetyltransferase [Acinetobacter baumannii AYE]	acetyl-CoA acetyltransferase	Acinetobacter baumannii AYE	ketoacyl-synt	PF00109.22	Beta-ketoacyl_synthase_N-terminal_domain	253	gi|169796353|ref|YP_001714146.1|	-	401	2.2e-07	18.4	0.8	2	2	0.31	0.92	-3.3	0	89	192	363	377	360	391	0.54
YP_001714199.1	beta-ketoadipyl CoA thiolase [Acinetobacter baumannii AYE]	beta-ketoadipyl CoA thiolase	Acinetobacter baumannii AYE	ketoacyl-synt	PF00109.22	Beta-ketoacyl_synthase_N-terminal_domain	253	gi|169796406|ref|YP_001714199.1|	-	402	1.1e-11	32.5	0.1	1	1	7.8e-12	2.3e-11	31.4	0.1	167	222	82	136	80	142	0.85
YP_001714379.1	3-oxoacyl-ACP synthase [Acinetobacter baumannii AYE]	3-oxoacyl-ACP synthase	Acinetobacter baumannii AYE	ketoacyl-synt	PF00109.22	Beta-ketoacyl_synthase_N-terminal_domain	253	gi|169796586|ref|YP_001714379.1|	-	368	4.4e-09	23.9	1.6	1	2	8e-06	2.4e-05	11.7	0	61	111	71	118	2	133	0.68
YP_001714379.1	3-oxoacyl-ACP synthase [Acinetobacter baumannii AYE]	3-oxoacyl-ACP synthase	Acinetobacter baumannii AYE	ketoacyl-synt	PF00109.22	Beta-ketoacyl_synthase_N-terminal_domain	253	gi|169796586|ref|YP_001714379.1|	-	368	4.4e-09	23.9	1.6	2	2	1e-05	3.1e-05	11.3	0.6	154	199	134	179	122	184	0.86
YP_001714748.1	beta-ketoacyl-ACP synthase [Acinetobacter baumannii AYE]	beta-ketoacyl-ACP synthase	Acinetobacter baumannii AYE	ketoacyl-synt	PF00109.22	Beta-ketoacyl_synthase_N-terminal_domain	253	gi|169796955|ref|YP_001714748.1|	-	409	8.1e-44	137.7	1.4	1	1	1.2e-43	1.8e-43	136.6	1.4	1	253	1	244	1	244	0.87
YP_001714748.1	beta-ketoacyl-ACP synthase [Acinetobacter baumannii AYE]	beta-ketoacyl-ACP synthase	Acinetobacter baumannii AYE	Ketoacyl-synt_C	PF02801.18	Beta-ketoacyl_synthase_C-terminal_domain	118	gi|169796955|ref|YP_001714748.1|	-	409	2.7e-35	108.8	0.7	1	1	3.2e-35	4.9e-35	107.9	0.7	1	117	252	364	252	365	0.95
YP_001715229.1	3-ketoacyl-CoA thiolase [Acinetobacter baumannii AYE]	3-ketoacyl-CoA thiolase	Acinetobacter baumannii AYE	ketoacyl-synt	PF00109.22	Beta-ketoacyl_synthase_N-terminal_domain	253	gi|169797436|ref|YP_001715229.1|	-	390	6.6e-07	16.8	0.4	1	4	0.44	1.3	-3.9	0	195	219	8	32	7	36	0.72
YP_001715229.1	3-ketoacyl-CoA thiolase [Acinetobacter baumannii AYE]	3-ketoacyl-CoA thiolase	Acinetobacter baumannii AYE	ketoacyl-synt	PF00109.22	Beta-ketoacyl_synthase_N-terminal_domain	253	gi|169797436|ref|YP_001715229.1|	-	390	6.6e-07	16.8	0.4	2	4	2.2e-07	6.6e-07	16.8	0.4	174	218	94	138	88	155	0.86
YP_001715229.1	3-ketoacyl-CoA thiolase [Acinetobacter baumannii AYE]	3-ketoacyl-CoA thiolase	Acinetobacter baumannii AYE	ketoacyl-synt	PF00109.22	Beta-ketoacyl_synthase_N-terminal_domain	253	gi|169797436|ref|YP_001715229.1|	-	390	6.6e-07	16.8	0.4	3	4	0.11	0.33	-1.9	0.2	173	251	239	258	222	284	0.64
YP_001715229.1	3-ketoacyl-CoA thiolase [Acinetobacter baumannii AYE]	3-ketoacyl-CoA thiolase	Acinetobacter baumannii AYE	ketoacyl-synt	PF00109.22	Beta-ketoacyl_synthase_N-terminal_domain	253	gi|169797436|ref|YP_001715229.1|	-	390	6.6e-07	16.8	0.4	4	4	0.11	0.34	-1.9	0	95	114	291	310	289	346	0.67
YP_001715333.1	chloramphenicol acetyltransferase [Acinetobacter baumannii AYE]	chloramphenicol acetyltransferase	Acinetobacter baumannii AYE	Condensation	PF00668.16	Condensation_domain	301	gi|169797540|ref|YP_001715333.1|	-	219	3.3e-06	14	0.1	1	2	0.011	0.032	0.9	0	48	72	63	86	26	118	0.77
YP_001715333.1	chloramphenicol acetyltransferase [Acinetobacter baumannii AYE]	chloramphenicol acetyltransferase	Acinetobacter baumannii AYE	Condensation	PF00668.16	Condensation_domain	301	gi|169797540|ref|YP_001715333.1|	-	219	3.3e-06	14	0.1	2	2	8.4e-06	2.5e-05	11.1	0	131	160	187	216	168	219	0.88
YP_001715473.1	non-ribosomal peptide synthetase [Acinetobacter baumannii AYE]	non-ribosomal peptide synthetase	Acinetobacter baumannii AYE	Condensation	PF00668.16	Condensation_domain	301	gi|169797680|ref|YP_001715473.1|	-	1319	2.1e-49	155.8	0	1	1	1.4e-49	4.3e-49	154.8	0	7	300	17	305	13	306	0.93
YP_008207587.1	3-oxoacyl-(acyl-carrier-protein) synthase [Acinetobacter baumannii BJAB07104]	3-oxoacyl-(acyl-carrier-protein) synthase	Acinetobacter baumannii BJAB07104	ketoacyl-synt	PF00109.22	Beta-ketoacyl_synthase_N-terminal_domain	253	gi|523521508|ref|YP_008207587.1|	-	409	6.6e-44	138	1.3	1	1	8e-44	1.2e-43	137.2	1.3	1	253	1	244	1	244	0.89
YP_008207587.1	3-oxoacyl-(acyl-carrier-protein) synthase [Acinetobacter baumannii BJAB07104]	3-oxoacyl-(acyl-carrier-protein) synthase	Acinetobacter baumannii BJAB07104	Ketoacyl-synt_C	PF02801.18	Beta-ketoacyl_synthase_C-terminal_domain	118	gi|523521508|ref|YP_008207587.1|	-	409	1.1e-34	106.8	0.2	1	1	1.5e-34	2.3e-34	105.8	0.2	1	117	252	364	252	365	0.95
YP_008207617.1	Non-ribosomal peptide synthetase modules-related protein [Acinetobacter baumannii BJAB07104]	Non-ribosomal peptide synthetase modules-related protein	Acinetobacter baumannii BJAB07104	Condensation	PF00668.16	Condensation_domain	301	gi|523521538|ref|YP_008207617.1|	-	352	3e-50	158.6	0.2	1	2	1.5e-50	4.5e-50	158	0	7	300	17	305	13	306	0.93
YP_008207617.1	Non-ribosomal peptide synthetase modules-related protein [Acinetobacter baumannii BJAB07104]	Non-ribosomal peptide synthetase modules-related protein	Acinetobacter baumannii BJAB07104	Condensation	PF00668.16	Condensation_domain	301	gi|523521538|ref|YP_008207617.1|	-	352	3e-50	158.6	0.2	2	2	0.31	0.93	-3.9	0.2	225	244	312	331	307	336	0.57
YP_008207829.1	Acetyl-CoA acetyltransferase [Acinetobacter baumannii BJAB07104]	Acetyl-CoA acetyltransferase	Acinetobacter baumannii BJAB07104	ketoacyl-synt	PF00109.22	Beta-ketoacyl_synthase_N-terminal_domain	253	gi|523521750|ref|YP_008207829.1|	-	390	6.6e-07	16.8	0.4	1	4	0.44	1.3	-3.9	0	195	219	8	32	7	36	0.72
YP_008207829.1	Acetyl-CoA acetyltransferase [Acinetobacter baumannii BJAB07104]	Acetyl-CoA acetyltransferase	Acinetobacter baumannii BJAB07104	ketoacyl-synt	PF00109.22	Beta-ketoacyl_synthase_N-terminal_domain	253	gi|523521750|ref|YP_008207829.1|	-	390	6.6e-07	16.8	0.4	2	4	2.2e-07	6.6e-07	16.8	0.4	174	218	94	138	88	155	0.86
YP_008207829.1	Acetyl-CoA acetyltransferase [Acinetobacter baumannii BJAB07104]	Acetyl-CoA acetyltransferase	Acinetobacter baumannii BJAB07104	ketoacyl-synt	PF00109.22	Beta-ketoacyl_synthase_N-terminal_domain	253	gi|523521750|ref|YP_008207829.1|	-	390	6.6e-07	16.8	0.4	3	4	0.11	0.33	-1.9	0.2	173	251	239	258	222	284	0.64
YP_008207829.1	Acetyl-CoA acetyltransferase [Acinetobacter baumannii BJAB07104]	Acetyl-CoA acetyltransferase	Acinetobacter baumannii BJAB07104	ketoacyl-synt	PF00109.22	Beta-ketoacyl_synthase_N-terminal_domain	253	gi|523521750|ref|YP_008207829.1|	-	390	6.6e-07	16.8	0.4	4	4	0.11	0.34	-1.9	0	95	114	291	310	289	346	0.67
YP_008208041.1	3-oxoacyl-(acyl-carrier-protein) synthase [Acinetobacter baumannii BJAB07104]	3-oxoacyl-(acyl-carrier-protein) synthase	Acinetobacter baumannii BJAB07104	ketoacyl-synt	PF00109.22	Beta-ketoacyl_synthase_N-terminal_domain	253	gi|523521962|ref|YP_008208041.1|	-	400	1.3e-24	74.8	0.1	1	1	1.3e-24	2e-24	74.2	0.1	87	250	78	240	52	242	0.83
YP_008208041.1	3-oxoacyl-(acyl-carrier-protein) synthase [Acinetobacter baumannii BJAB07104]	3-oxoacyl-(acyl-carrier-protein) synthase	Acinetobacter baumannii BJAB07104	Ketoacyl-synt_C	PF02801.18	Beta-ketoacyl_synthase_C-terminal_domain	118	gi|523521962|ref|YP_008208041.1|	-	400	2.2e-31	96.1	0.6	1	1	3.5e-31	5.3e-31	94.9	0.6	4	113	246	351	244	357	0.94
YP_008208044.1	3-oxoacyl-(acyl-carrier-protein) synthase [Acinetobacter baumannii BJAB07104]	3-oxoacyl-(acyl-carrier-protein) synthase	Acinetobacter baumannii BJAB07104	ketoacyl-synt	PF00109.22	Beta-ketoacyl_synthase_N-terminal_domain	253	gi|523521965|ref|YP_008208044.1|	-	408	1e-45	143.9	2.7	1	1	1e-45	1.5e-45	143.4	2.7	1	253	1	246	1	246	0.89
YP_008208044.1	3-oxoacyl-(acyl-carrier-protein) synthase [Acinetobacter baumannii BJAB07104]	3-oxoacyl-(acyl-carrier-protein) synthase	Acinetobacter baumannii BJAB07104	Ketoacyl-synt_C	PF02801.18	Beta-ketoacyl_synthase_C-terminal_domain	118	gi|523521965|ref|YP_008208044.1|	-	408	3e-33	102.1	0	1	1	4.7e-33	7e-33	100.9	0	1	117	254	362	254	363	0.96
YP_008208327.1	3-oxoacyl-(acyl-carrier-protein) synthase [Acinetobacter baumannii BJAB07104]	3-oxoacyl-(acyl-carrier-protein) synthase	Acinetobacter baumannii BJAB07104	ketoacyl-synt	PF00109.22	Beta-ketoacyl_synthase_N-terminal_domain	253	gi|523522248|ref|YP_008208327.1|	-	409	8.1e-44	137.7	1.4	1	1	1.2e-43	1.8e-43	136.6	1.4	1	253	1	244	1	244	0.87
YP_008208327.1	3-oxoacyl-(acyl-carrier-protein) synthase [Acinetobacter baumannii BJAB07104]	3-oxoacyl-(acyl-carrier-protein) synthase	Acinetobacter baumannii BJAB07104	Ketoacyl-synt_C	PF02801.18	Beta-ketoacyl_synthase_C-terminal_domain	118	gi|523522248|ref|YP_008208327.1|	-	409	2.7e-35	108.8	0.7	1	1	3.2e-35	4.9e-35	107.9	0.7	1	117	252	364	252	365	0.95
YP_008208818.1	3-oxoacyl-[acyl-carrier-protein] synthase III [Acinetobacter baumannii BJAB07104]	3-oxoacyl-acyl-carrier-protein synthase III	Acinetobacter baumannii BJAB07104	ketoacyl-synt	PF00109.22	Beta-ketoacyl_synthase_N-terminal_domain	253	gi|523522739|ref|YP_008208818.1|	-	368	4.4e-09	23.9	1.6	1	2	8e-06	2.4e-05	11.7	0	61	111	71	118	2	133	0.68
YP_008208818.1	3-oxoacyl-[acyl-carrier-protein] synthase III [Acinetobacter baumannii BJAB07104]	3-oxoacyl-acyl-carrier-protein synthase III	Acinetobacter baumannii BJAB07104	ketoacyl-synt	PF00109.22	Beta-ketoacyl_synthase_N-terminal_domain	253	gi|523522739|ref|YP_008208818.1|	-	368	4.4e-09	23.9	1.6	2	2	1e-05	3.1e-05	11.3	0.6	154	199	134	179	122	184	0.86
YP_008208971.1	Acetyl-CoA acetyltransferase [Acinetobacter baumannii BJAB07104]	Acetyl-CoA acetyltransferase	Acinetobacter baumannii BJAB07104	ketoacyl-synt	PF00109.22	Beta-ketoacyl_synthase_N-terminal_domain	253	gi|523522892|ref|YP_008208971.1|	-	402	9.8e-12	32.6	0	1	1	6.9e-12	2.1e-11	31.6	0	167	222	82	136	78	142	0.85
YP_008209201.1	Acetyl-CoA acetyltransferase [Acinetobacter baumannii BJAB07104]	Acetyl-CoA acetyltransferase	Acinetobacter baumannii BJAB07104	ketoacyl-synt	PF00109.22	Beta-ketoacyl_synthase_N-terminal_domain	253	gi|523523122|ref|YP_008209201.1|	-	403	6.1e-10	26.7	0.6	1	2	4.9e-10	1.5e-09	25.5	0.2	167	208	84	125	69	144	0.84
YP_008209201.1	Acetyl-CoA acetyltransferase [Acinetobacter baumannii BJAB07104]	Acetyl-CoA acetyltransferase	Acinetobacter baumannii BJAB07104	ketoacyl-synt	PF00109.22	Beta-ketoacyl_synthase_N-terminal_domain	253	gi|523523122|ref|YP_008209201.1|	-	403	6.1e-10	26.7	0.6	2	2	0.14	0.41	-2.2	0	80	107	256	280	208	324	0.65
YP_008209241.1	Acetyl-CoA acetyltransferase [Acinetobacter baumannii BJAB07104]	Acetyl-CoA acetyltransferase	Acinetobacter baumannii BJAB07104	ketoacyl-synt	PF00109.22	Beta-ketoacyl_synthase_N-terminal_domain	253	gi|523523162|ref|YP_008209241.1|	-	404	4.4e-10	27.2	0.7	1	2	4.8e-10	1.4e-09	25.5	0.2	167	208	82	123	67	142	0.84
YP_008209241.1	Acetyl-CoA acetyltransferase [Acinetobacter baumannii BJAB07104]	Acetyl-CoA acetyltransferase	Acinetobacter baumannii BJAB07104	ketoacyl-synt	PF00109.22	Beta-ketoacyl_synthase_N-terminal_domain	253	gi|523523162|ref|YP_008209241.1|	-	404	4.4e-10	27.2	0.7	2	2	0.046	0.14	-0.6	0	67	110	241	281	189	332	0.73
YP_008209447.1	Acetyl-CoA acetyltransferase [Acinetobacter baumannii BJAB07104]	Acetyl-CoA acetyltransferase	Acinetobacter baumannii BJAB07104	ketoacyl-synt	PF00109.22	Beta-ketoacyl_synthase_N-terminal_domain	253	gi|523523368|ref|YP_008209447.1|	-	390	3.7e-07	17.6	5.6	1	5	0.0022	0.0033	4.7	0	93	137	31	75	26	86	0.8
YP_008209447.1	Acetyl-CoA acetyltransferase [Acinetobacter baumannii BJAB07104]	Acetyl-CoA acetyltransferase	Acinetobacter baumannii BJAB07104	ketoacyl-synt	PF00109.22	Beta-ketoacyl_synthase_N-terminal_domain	253	gi|523523368|ref|YP_008209447.1|	-	390	3.7e-07	17.6	5.6	2	5	5.8e-06	8.7e-06	13.1	1.2	169	208	82	121	78	131	0.89
YP_008209447.1	Acetyl-CoA acetyltransferase [Acinetobacter baumannii BJAB07104]	Acetyl-CoA acetyltransferase	Acinetobacter baumannii BJAB07104	ketoacyl-synt	PF00109.22	Beta-ketoacyl_synthase_N-terminal_domain	253	gi|523523368|ref|YP_008209447.1|	-	390	3.7e-07	17.6	5.6	3	5	0.37	0.56	-2.6	0	82	101	172	191	148	217	0.65
YP_008209447.1	Acetyl-CoA acetyltransferase [Acinetobacter baumannii BJAB07104]	Acetyl-CoA acetyltransferase	Acinetobacter baumannii BJAB07104	ketoacyl-synt	PF00109.22	Beta-ketoacyl_synthase_N-terminal_domain	253	gi|523523368|ref|YP_008209447.1|	-	390	3.7e-07	17.6	5.6	4	5	0.17	0.25	-1.5	0	234	251	244	261	229	263	0.71
YP_008209447.1	Acetyl-CoA acetyltransferase [Acinetobacter baumannii BJAB07104]	Acetyl-CoA acetyltransferase	Acinetobacter baumannii BJAB07104	ketoacyl-synt	PF00109.22	Beta-ketoacyl_synthase_N-terminal_domain	253	gi|523523368|ref|YP_008209447.1|	-	390	3.7e-07	17.6	5.6	5	5	0.39	0.58	-2.7	0	96	112	295	311	292	350	0.67
YP_008209447.1	Acetyl-CoA acetyltransferase [Acinetobacter baumannii BJAB07104]	Acetyl-CoA acetyltransferase	Acinetobacter baumannii BJAB07104	Ketoacyl-synt_C	PF02801.18	Beta-ketoacyl_synthase_C-terminal_domain	118	gi|523523368|ref|YP_008209447.1|	-	390	6.2e-06	14	0.1	1	2	0.00038	0.00056	7.7	0	14	47	20	51	5	53	0.7
YP_008209447.1	Acetyl-CoA acetyltransferase [Acinetobacter baumannii BJAB07104]	Acetyl-CoA acetyltransferase	Acinetobacter baumannii BJAB07104	Ketoacyl-synt_C	PF02801.18	Beta-ketoacyl_synthase_C-terminal_domain	118	gi|523523368|ref|YP_008209447.1|	-	390	6.2e-06	14	0.1	2	2	0.015	0.022	2.6	0	27	49	292	314	269	367	0.72
YP_008209832.1	Acetyl-CoA acetyltransferase [Acinetobacter baumannii BJAB07104]	Acetyl-CoA acetyltransferase	Acinetobacter baumannii BJAB07104	ketoacyl-synt	PF00109.22	Beta-ketoacyl_synthase_N-terminal_domain	253	gi|523523753|ref|YP_008209832.1|	-	401	2.3e-07	18.3	0.8	1	2	1.8e-07	5.4e-07	17.1	0.2	170	222	84	135	65	143	0.77
YP_008209832.1	Acetyl-CoA acetyltransferase [Acinetobacter baumannii BJAB07104]	Acetyl-CoA acetyltransferase	Acinetobacter baumannii BJAB07104	ketoacyl-synt	PF00109.22	Beta-ketoacyl_synthase_N-terminal_domain	253	gi|523523753|ref|YP_008209832.1|	-	401	2.3e-07	18.3	0.8	2	2	0.31	0.92	-3.3	0	89	192	363	377	360	391	0.54
YP_008209875.1	Acetyl-CoA acetyltransferase [Acinetobacter baumannii BJAB07104]	Acetyl-CoA acetyltransferase	Acinetobacter baumannii BJAB07104	ketoacyl-synt	PF00109.22	Beta-ketoacyl_synthase_N-terminal_domain	253	gi|523523796|ref|YP_008209875.1|	-	522	2.6e-07	18.1	0.1	1	1	2.4e-07	7.3e-07	16.7	0.1	166	206	177	217	168	231	0.82
YP_008210200.1	Non-ribosomal peptide synthetase modules-related protein [Acinetobacter baumannii BJAB07104]	Non-ribosomal peptide synthetase modules-related protein	Acinetobacter baumannii BJAB07104	Condensation	PF00668.16	Condensation_domain	301	gi|523524121|ref|YP_008210200.1|	-	980	4.3e-55	174.5	14.5	1	2	1.5e-36	4.4e-36	112.1	1.2	4	301	26	321	23	321	0.9
YP_008210200.1	Non-ribosomal peptide synthetase modules-related protein [Acinetobacter baumannii BJAB07104]	Non-ribosomal peptide synthetase modules-related protein	Acinetobacter baumannii BJAB07104	Condensation	PF00668.16	Condensation_domain	301	gi|523524121|ref|YP_008210200.1|	-	980	4.3e-55	174.5	14.5	2	2	6.7e-23	2e-22	67.2	6.2	6	272	472	726	468	728	0.9
YP_008210208.1	Non-ribosomal peptide synthetase modules-related protein [Acinetobacter baumannii BJAB07104]	Non-ribosomal peptide synthetase modules-related protein	Acinetobacter baumannii BJAB07104	Condensation	PF00668.16	Condensation_domain	301	gi|523524129|ref|YP_008210208.1|	-	676	1.6e-47	149.7	11.6	1	2	7.2e-05	0.00022	8	1.5	34	160	18	138	5	191	0.82
YP_008210208.1	Non-ribosomal peptide synthetase modules-related protein [Acinetobacter baumannii BJAB07104]	Non-ribosomal peptide synthetase modules-related protein	Acinetobacter baumannii BJAB07104	Condensation	PF00668.16	Condensation_domain	301	gi|523524129|ref|YP_008210208.1|	-	676	1.6e-47	149.7	11.6	2	2	4.2e-47	1.3e-46	146.7	2.9	3	299	253	545	251	547	0.9
YP_008210573.1	hypothetical protein BJAB07104_03110 [Acinetobacter baumannii BJAB07104]	hypothetical protein BJAB07104_03110	Acinetobacter baumannii BJAB07104	Condensation	PF00668.16	Condensation_domain	301	gi|523524494|ref|YP_008210573.1|	-	461	1e-09	25.5	0.2	1	2	5.8e-07	1.7e-06	14.9	0.1	82	154	79	151	67	175	0.72
YP_008210573.1	hypothetical protein BJAB07104_03110 [Acinetobacter baumannii BJAB07104]	hypothetical protein BJAB07104_03110	Acinetobacter baumannii BJAB07104	Condensation	PF00668.16	Condensation_domain	301	gi|523524494|ref|YP_008210573.1|	-	461	1e-09	25.5	0.2	2	2	5.3e-05	0.00016	8.5	0	224	261	237	274	205	309	0.8
YP_008210641.1	Acetyl-CoA acetyltransferase [Acinetobacter baumannii BJAB07104]	Acetyl-CoA acetyltransferase	Acinetobacter baumannii BJAB07104	ketoacyl-synt	PF00109.22	Beta-ketoacyl_synthase_N-terminal_domain	253	gi|523524562|ref|YP_008210641.1|	-	391	3.3e-08	21	6.9	1	4	0.00096	0.0029	4.9	0	91	127	29	65	26	85	0.77
YP_008210641.1	Acetyl-CoA acetyltransferase [Acinetobacter baumannii BJAB07104]	Acetyl-CoA acetyltransferase	Acinetobacter baumannii BJAB07104	ketoacyl-synt	PF00109.22	Beta-ketoacyl_synthase_N-terminal_domain	253	gi|523524562|ref|YP_008210641.1|	-	391	3.3e-08	21	6.9	2	4	7e-08	2.1e-07	18.4	1.3	169	208	82	121	76	136	0.87
YP_008210641.1	Acetyl-CoA acetyltransferase [Acinetobacter baumannii BJAB07104]	Acetyl-CoA acetyltransferase	Acinetobacter baumannii BJAB07104	ketoacyl-synt	PF00109.22	Beta-ketoacyl_synthase_N-terminal_domain	253	gi|523524562|ref|YP_008210641.1|	-	391	3.3e-08	21	6.9	3	4	0.25	0.74	-3	0	113	136	151	174	145	198	0.56
YP_008210641.1	Acetyl-CoA acetyltransferase [Acinetobacter baumannii BJAB07104]	Acetyl-CoA acetyltransferase	Acinetobacter baumannii BJAB07104	ketoacyl-synt	PF00109.22	Beta-ketoacyl_synthase_N-terminal_domain	253	gi|523524562|ref|YP_008210641.1|	-	391	3.3e-08	21	6.9	4	4	0.22	0.66	-2.8	0.1	233	251	243	261	233	263	0.67
YP_008210651.1	Acetyl-CoA acetyltransferase [Acinetobacter baumannii BJAB07104]	Acetyl-CoA acetyltransferase	Acinetobacter baumannii BJAB07104	ketoacyl-synt	PF00109.22	Beta-ketoacyl_synthase_N-terminal_domain	253	gi|523524572|ref|YP_008210651.1|	-	401	4.3e-10	27.3	0.1	1	2	1.2e-09	3.7e-09	24.2	0	175	206	91	122	73	145	0.92
YP_008210651.1	Acetyl-CoA acetyltransferase [Acinetobacter baumannii BJAB07104]	Acetyl-CoA acetyltransferase	Acinetobacter baumannii BJAB07104	ketoacyl-synt	PF00109.22	Beta-ketoacyl_synthase_N-terminal_domain	253	gi|523524572|ref|YP_008210651.1|	-	401	4.3e-10	27.3	0.1	2	2	0.028	0.085	0.1	0	95	114	304	323	292	364	0.81
YP_008215311.1	Non-ribosomal peptide synthetase modules-related protein [Acinetobacter baumannii BJAB0715]	Non-ribosomal peptide synthetase modules-related protein	Acinetobacter baumannii BJAB0715	Condensation	PF00668.16	Condensation_domain	301	gi|523529284|ref|YP_008215311.1|	-	607	2e-50	159.2	0	1	1	1.5e-50	4.5e-50	158	0	7	300	17	305	13	306	0.93
YP_008215495.1	Acetyl-CoA acetyltransferase [Acinetobacter baumannii BJAB0715]	Acetyl-CoA acetyltransferase	Acinetobacter baumannii BJAB0715	ketoacyl-synt	PF00109.22	Beta-ketoacyl_synthase_N-terminal_domain	253	gi|523529468|ref|YP_008215495.1|	-	390	6.6e-07	16.8	0.4	1	4	0.44	1.3	-3.9	0	195	219	8	32	7	36	0.72
YP_008215495.1	Acetyl-CoA acetyltransferase [Acinetobacter baumannii BJAB0715]	Acetyl-CoA acetyltransferase	Acinetobacter baumannii BJAB0715	ketoacyl-synt	PF00109.22	Beta-ketoacyl_synthase_N-terminal_domain	253	gi|523529468|ref|YP_008215495.1|	-	390	6.6e-07	16.8	0.4	2	4	2.2e-07	6.6e-07	16.8	0.4	174	218	94	138	88	155	0.86
YP_008215495.1	Acetyl-CoA acetyltransferase [Acinetobacter baumannii BJAB0715]	Acetyl-CoA acetyltransferase	Acinetobacter baumannii BJAB0715	ketoacyl-synt	PF00109.22	Beta-ketoacyl_synthase_N-terminal_domain	253	gi|523529468|ref|YP_008215495.1|	-	390	6.6e-07	16.8	0.4	3	4	0.11	0.33	-1.9	0.2	173	251	239	258	222	284	0.64
YP_008215495.1	Acetyl-CoA acetyltransferase [Acinetobacter baumannii BJAB0715]	Acetyl-CoA acetyltransferase	Acinetobacter baumannii BJAB0715	ketoacyl-synt	PF00109.22	Beta-ketoacyl_synthase_N-terminal_domain	253	gi|523529468|ref|YP_008215495.1|	-	390	6.6e-07	16.8	0.4	4	4	0.11	0.34	-1.9	0	95	114	291	310	289	346	0.67
YP_008215998.1	3-oxoacyl-(acyl-carrier-protein) synthase [Acinetobacter baumannii BJAB0715]	3-oxoacyl-(acyl-carrier-protein) synthase	Acinetobacter baumannii BJAB0715	ketoacyl-synt	PF00109.22	Beta-ketoacyl_synthase_N-terminal_domain	253	gi|523529971|ref|YP_008215998.1|	-	409	8.1e-44	137.7	1.4	1	1	1.2e-43	1.8e-43	136.6	1.4	1	253	1	244	1	244	0.87
YP_008215998.1	3-oxoacyl-(acyl-carrier-protein) synthase [Acinetobacter baumannii BJAB0715]	3-oxoacyl-(acyl-carrier-protein) synthase	Acinetobacter baumannii BJAB0715	Ketoacyl-synt_C	PF02801.18	Beta-ketoacyl_synthase_C-terminal_domain	118	gi|523529971|ref|YP_008215998.1|	-	409	2.7e-35	108.8	0.7	1	1	3.2e-35	4.9e-35	107.9	0.7	1	117	252	364	252	365	0.95
YP_008216515.1	3-oxoacyl-[acyl-carrier-protein] synthase III [Acinetobacter baumannii BJAB0715]	3-oxoacyl-acyl-carrier-protein synthase III	Acinetobacter baumannii BJAB0715	ketoacyl-synt	PF00109.22	Beta-ketoacyl_synthase_N-terminal_domain	253	gi|523530488|ref|YP_008216515.1|	-	368	4.4e-09	23.9	1.6	1	2	8e-06	2.4e-05	11.7	0	61	111	71	118	2	133	0.68
YP_008216515.1	3-oxoacyl-[acyl-carrier-protein] synthase III [Acinetobacter baumannii BJAB0715]	3-oxoacyl-acyl-carrier-protein synthase III	Acinetobacter baumannii BJAB0715	ketoacyl-synt	PF00109.22	Beta-ketoacyl_synthase_N-terminal_domain	253	gi|523530488|ref|YP_008216515.1|	-	368	4.4e-09	23.9	1.6	2	2	1e-05	3.1e-05	11.3	0.6	154	199	134	179	122	184	0.86
YP_008216675.1	Acetyl-CoA acetyltransferase [Acinetobacter baumannii BJAB0715]	Acetyl-CoA acetyltransferase	Acinetobacter baumannii BJAB0715	ketoacyl-synt	PF00109.22	Beta-ketoacyl_synthase_N-terminal_domain	253	gi|523530648|ref|YP_008216675.1|	-	402	2.3e-11	31.4	0	1	1	1.6e-11	4.8e-11	30.4	0	167	222	82	136	79	142	0.84
YP_008216721.1	Acetyl-CoA acetyltransferase [Acinetobacter baumannii BJAB0715]	Acetyl-CoA acetyltransferase	Acinetobacter baumannii BJAB0715	ketoacyl-synt	PF00109.22	Beta-ketoacyl_synthase_N-terminal_domain	253	gi|523530694|ref|YP_008216721.1|	-	401	2.3e-07	18.3	0.8	1	2	1.8e-07	5.4e-07	17.1	0.2	170	222	84	135	65	143	0.77
YP_008216721.1	Acetyl-CoA acetyltransferase [Acinetobacter baumannii BJAB0715]	Acetyl-CoA acetyltransferase	Acinetobacter baumannii BJAB0715	ketoacyl-synt	PF00109.22	Beta-ketoacyl_synthase_N-terminal_domain	253	gi|523530694|ref|YP_008216721.1|	-	401	2.3e-07	18.3	0.8	2	2	0.31	0.92	-3.3	0	89	192	363	377	360	391	0.54
YP_008217099.1	Acetyl-CoA acetyltransferase [Acinetobacter baumannii BJAB0715]	Acetyl-CoA acetyltransferase	Acinetobacter baumannii BJAB0715	ketoacyl-synt	PF00109.22	Beta-ketoacyl_synthase_N-terminal_domain	253	gi|523531072|ref|YP_008217099.1|	-	390	3.1e-07	17.9	5.3	1	5	0.0022	0.0033	4.7	0	93	137	31	75	26	86	0.8
YP_008217099.1	Acetyl-CoA acetyltransferase [Acinetobacter baumannii BJAB0715]	Acetyl-CoA acetyltransferase	Acinetobacter baumannii BJAB0715	ketoacyl-synt	PF00109.22	Beta-ketoacyl_synthase_N-terminal_domain	253	gi|523531072|ref|YP_008217099.1|	-	390	3.1e-07	17.9	5.3	2	5	5.8e-06	8.7e-06	13.1	1.2	169	208	82	121	78	131	0.89
YP_008217099.1	Acetyl-CoA acetyltransferase [Acinetobacter baumannii BJAB0715]	Acetyl-CoA acetyltransferase	Acinetobacter baumannii BJAB0715	ketoacyl-synt	PF00109.22	Beta-ketoacyl_synthase_N-terminal_domain	253	gi|523531072|ref|YP_008217099.1|	-	390	3.1e-07	17.9	5.3	3	5	0.42	0.63	-2.8	0	82	101	172	191	148	210	0.63
YP_008217099.1	Acetyl-CoA acetyltransferase [Acinetobacter baumannii BJAB0715]	Acetyl-CoA acetyltransferase	Acinetobacter baumannii BJAB0715	ketoacyl-synt	PF00109.22	Beta-ketoacyl_synthase_N-terminal_domain	253	gi|523531072|ref|YP_008217099.1|	-	390	3.1e-07	17.9	5.3	4	5	0.18	0.26	-1.6	0	234	251	244	261	231	263	0.7
YP_008217099.1	Acetyl-CoA acetyltransferase [Acinetobacter baumannii BJAB0715]	Acetyl-CoA acetyltransferase	Acinetobacter baumannii BJAB0715	ketoacyl-synt	PF00109.22	Beta-ketoacyl_synthase_N-terminal_domain	253	gi|523531072|ref|YP_008217099.1|	-	390	3.1e-07	17.9	5.3	5	5	0.39	0.58	-2.7	0	96	112	295	311	292	350	0.67
YP_008217099.1	Acetyl-CoA acetyltransferase [Acinetobacter baumannii BJAB0715]	Acetyl-CoA acetyltransferase	Acinetobacter baumannii BJAB0715	Ketoacyl-synt_C	PF02801.18	Beta-ketoacyl_synthase_C-terminal_domain	118	gi|523531072|ref|YP_008217099.1|	-	390	6.3e-06	14	0.1	1	2	0.00038	0.00056	7.7	0	14	47	20	51	5	53	0.7
YP_008217099.1	Acetyl-CoA acetyltransferase [Acinetobacter baumannii BJAB0715]	Acetyl-CoA acetyltransferase	Acinetobacter baumannii BJAB0715	Ketoacyl-synt_C	PF02801.18	Beta-ketoacyl_synthase_C-terminal_domain	118	gi|523531072|ref|YP_008217099.1|	-	390	6.3e-06	14	0.1	2	2	0.015	0.022	2.6	0	27	49	292	314	269	367	0.72
YP_008217255.1	Acetyl-CoA acetyltransferase [Acinetobacter baumannii BJAB0715]	Acetyl-CoA acetyltransferase	Acinetobacter baumannii BJAB0715	ketoacyl-synt	PF00109.22	Beta-ketoacyl_synthase_N-terminal_domain	253	gi|523531228|ref|YP_008217255.1|	-	404	4.8e-10	27.1	0.8	1	2	5e-10	1.5e-09	25.5	0.2	167	208	82	123	67	142	0.84
YP_008217255.1	Acetyl-CoA acetyltransferase [Acinetobacter baumannii BJAB0715]	Acetyl-CoA acetyltransferase	Acinetobacter baumannii BJAB0715	ketoacyl-synt	PF00109.22	Beta-ketoacyl_synthase_N-terminal_domain	253	gi|523531228|ref|YP_008217255.1|	-	404	4.8e-10	27.1	0.8	2	2	0.051	0.15	-0.8	0	73	110	247	281	203	336	0.72
YP_008217295.1	Acetyl-CoA acetyltransferase [Acinetobacter baumannii BJAB0715]	Acetyl-CoA acetyltransferase	Acinetobacter baumannii BJAB0715	ketoacyl-synt	PF00109.22	Beta-ketoacyl_synthase_N-terminal_domain	253	gi|523531268|ref|YP_008217295.1|	-	403	4.8e-10	27.1	0.8	1	2	4.9e-10	1.5e-09	25.5	0.2	167	208	84	125	69	144	0.84
YP_008217295.1	Acetyl-CoA acetyltransferase [Acinetobacter baumannii BJAB0715]	Acetyl-CoA acetyltransferase	Acinetobacter baumannii BJAB0715	ketoacyl-synt	PF00109.22	Beta-ketoacyl_synthase_N-terminal_domain	253	gi|523531268|ref|YP_008217295.1|	-	403	4.8e-10	27.1	0.8	2	2	0.05	0.15	-0.8	0	73	110	249	283	205	338	0.72
YP_008217461.1	Acetyl-CoA acetyltransferase [Acinetobacter baumannii BJAB0715]	Acetyl-CoA acetyltransferase	Acinetobacter baumannii BJAB0715	ketoacyl-synt	PF00109.22	Beta-ketoacyl_synthase_N-terminal_domain	253	gi|523531434|ref|YP_008217461.1|	-	522	2.6e-07	18.1	0.1	1	1	2.4e-07	7.3e-07	16.7	0.1	166	206	177	217	168	231	0.82
YP_008217933.1	Non-ribosomal peptide synthetase modules-related protein [Acinetobacter baumannii BJAB0715]	Non-ribosomal peptide synthetase modules-related protein	Acinetobacter baumannii BJAB0715	Condensation	PF00668.16	Condensation_domain	301	gi|523531906|ref|YP_008217933.1|	-	980	2.3e-56	178.7	13.3	1	2	3.3e-36	1e-35	110.9	0.8	4	301	26	321	23	321	0.9
YP_008217933.1	Non-ribosomal peptide synthetase modules-related protein [Acinetobacter baumannii BJAB0715]	Non-ribosomal peptide synthetase modules-related protein	Acinetobacter baumannii BJAB0715	Condensation	PF00668.16	Condensation_domain	301	gi|523531906|ref|YP_008217933.1|	-	980	2.3e-56	178.7	13.3	2	2	2.1e-24	6.2e-24	72.2	5.7	6	272	472	726	468	728	0.9
YP_008217941.1	Non-ribosomal peptide synthetase modules-related protein [Acinetobacter baumannii BJAB0715]	Non-ribosomal peptide synthetase modules-related protein	Acinetobacter baumannii BJAB0715	Condensation	PF00668.16	Condensation_domain	301	gi|523531914|ref|YP_008217941.1|	-	698	1.9e-47	149.4	9.9	1	2	1.3e-06	3.8e-06	13.8	0.9	13	160	20	160	12	182	0.81
YP_008217941.1	Non-ribosomal peptide synthetase modules-related protein [Acinetobacter baumannii BJAB0715]	Non-ribosomal peptide synthetase modules-related protein	Acinetobacter baumannii BJAB0715	Condensation	PF00668.16	Condensation_domain	301	gi|523531914|ref|YP_008217941.1|	-	698	1.9e-47	149.4	9.9	2	2	4.3e-45	1.3e-44	140.1	2.4	3	299	275	567	273	569	0.89
YP_008218325.1	hypothetical protein BJAB0715_03177 [Acinetobacter baumannii BJAB0715]	hypothetical protein BJAB0715_03177	Acinetobacter baumannii BJAB0715	Condensation	PF00668.16	Condensation_domain	301	gi|523532298|ref|YP_008218325.1|	-	461	6.7e-10	26.1	0.1	1	2	4e-07	1.2e-06	15.4	0.1	82	157	79	154	67	181	0.73
YP_008218325.1	hypothetical protein BJAB0715_03177 [Acinetobacter baumannii BJAB0715]	hypothetical protein BJAB0715_03177	Acinetobacter baumannii BJAB0715	Condensation	PF00668.16	Condensation_domain	301	gi|523532298|ref|YP_008218325.1|	-	461	6.7e-10	26.1	0.1	2	2	4.9e-05	0.00015	8.6	0	224	261	237	274	205	310	0.79
YP_008218390.1	Acetyl-CoA acetyltransferase [Acinetobacter baumannii BJAB0715]	Acetyl-CoA acetyltransferase	Acinetobacter baumannii BJAB0715	ketoacyl-synt	PF00109.22	Beta-ketoacyl_synthase_N-terminal_domain	253	gi|523532363|ref|YP_008218390.1|	-	391	5.5e-08	20.3	6.4	1	4	0.0022	0.0066	3.7	0	91	128	29	66	26	86	0.77
YP_008218390.1	Acetyl-CoA acetyltransferase [Acinetobacter baumannii BJAB0715]	Acetyl-CoA acetyltransferase	Acinetobacter baumannii BJAB0715	ketoacyl-synt	PF00109.22	Beta-ketoacyl_synthase_N-terminal_domain	253	gi|523532363|ref|YP_008218390.1|	-	391	5.5e-08	20.3	6.4	2	4	7.6e-08	2.3e-07	18.3	1.4	169	208	82	121	77	136	0.87
YP_008218390.1	Acetyl-CoA acetyltransferase [Acinetobacter baumannii BJAB0715]	Acetyl-CoA acetyltransferase	Acinetobacter baumannii BJAB0715	ketoacyl-synt	PF00109.22	Beta-ketoacyl_synthase_N-terminal_domain	253	gi|523532363|ref|YP_008218390.1|	-	391	5.5e-08	20.3	6.4	3	4	0.24	0.71	-3	0	113	136	151	174	145	200	0.56
YP_008218390.1	Acetyl-CoA acetyltransferase [Acinetobacter baumannii BJAB0715]	Acetyl-CoA acetyltransferase	Acinetobacter baumannii BJAB0715	ketoacyl-synt	PF00109.22	Beta-ketoacyl_synthase_N-terminal_domain	253	gi|523532363|ref|YP_008218390.1|	-	391	5.5e-08	20.3	6.4	4	4	0.22	0.66	-2.8	0.1	233	251	243	261	233	263	0.67
YP_008218400.1	Acetyl-CoA acetyltransferase [Acinetobacter baumannii BJAB0715]	Acetyl-CoA acetyltransferase	Acinetobacter baumannii BJAB0715	ketoacyl-synt	PF00109.22	Beta-ketoacyl_synthase_N-terminal_domain	253	gi|523532373|ref|YP_008218400.1|	-	401	4.2e-10	27.3	0.1	1	2	1.2e-09	3.7e-09	24.2	0	175	206	91	122	73	145	0.92
YP_008218400.1	Acetyl-CoA acetyltransferase [Acinetobacter baumannii BJAB0715]	Acetyl-CoA acetyltransferase	Acinetobacter baumannii BJAB0715	ketoacyl-synt	PF00109.22	Beta-ketoacyl_synthase_N-terminal_domain	253	gi|523532373|ref|YP_008218400.1|	-	401	4.2e-10	27.3	0.1	2	2	0.028	0.085	0.1	0	95	114	304	323	292	364	0.81
YP_008211454.1	3-oxoacyl-(acyl-carrier-protein) synthase [Acinetobacter baumannii BJAB0868]	3-oxoacyl-(acyl-carrier-protein) synthase	Acinetobacter baumannii BJAB0868	ketoacyl-synt	PF00109.22	Beta-ketoacyl_synthase_N-terminal_domain	253	gi|523525423|ref|YP_008211454.1|	-	409	6.9e-44	138	1.7	1	1	8.1e-44	1.2e-43	137.2	1.7	1	253	1	244	1	244	0.89
YP_008211454.1	3-oxoacyl-(acyl-carrier-protein) synthase [Acinetobacter baumannii BJAB0868]	3-oxoacyl-(acyl-carrier-protein) synthase	Acinetobacter baumannii BJAB0868	Ketoacyl-synt_C	PF02801.18	Beta-ketoacyl_synthase_C-terminal_domain	118	gi|523525423|ref|YP_008211454.1|	-	409	1.1e-34	106.8	0.2	1	1	1.5e-34	2.3e-34	105.8	0.2	1	117	252	364	252	365	0.95
YP_008211485.1	Non-ribosomal peptide synthetase modules-related protein [Acinetobacter baumannii BJAB0868]	Non-ribosomal peptide synthetase modules-related protein	Acinetobacter baumannii BJAB0868	Condensation	PF00668.16	Condensation_domain	301	gi|523525454|ref|YP_008211485.1|	-	352	3e-50	158.6	0.2	1	2	1.5e-50	4.5e-50	158	0	7	300	17	305	13	306	0.93
YP_008211485.1	Non-ribosomal peptide synthetase modules-related protein [Acinetobacter baumannii BJAB0868]	Non-ribosomal peptide synthetase modules-related protein	Acinetobacter baumannii BJAB0868	Condensation	PF00668.16	Condensation_domain	301	gi|523525454|ref|YP_008211485.1|	-	352	3e-50	158.6	0.2	2	2	0.31	0.93	-3.9	0.2	225	244	312	331	307	336	0.57
YP_008211694.1	Acetyl-CoA acetyltransferase [Acinetobacter baumannii BJAB0868]	Acetyl-CoA acetyltransferase	Acinetobacter baumannii BJAB0868	ketoacyl-synt	PF00109.22	Beta-ketoacyl_synthase_N-terminal_domain	253	gi|523525663|ref|YP_008211694.1|	-	390	6.6e-07	16.8	0.4	1	4	0.44	1.3	-3.9	0	195	219	8	32	7	36	0.72
YP_008211694.1	Acetyl-CoA acetyltransferase [Acinetobacter baumannii BJAB0868]	Acetyl-CoA acetyltransferase	Acinetobacter baumannii BJAB0868	ketoacyl-synt	PF00109.22	Beta-ketoacyl_synthase_N-terminal_domain	253	gi|523525663|ref|YP_008211694.1|	-	390	6.6e-07	16.8	0.4	2	4	2.2e-07	6.6e-07	16.8	0.4	174	218	94	138	88	155	0.86
YP_008211694.1	Acetyl-CoA acetyltransferase [Acinetobacter baumannii BJAB0868]	Acetyl-CoA acetyltransferase	Acinetobacter baumannii BJAB0868	ketoacyl-synt	PF00109.22	Beta-ketoacyl_synthase_N-terminal_domain	253	gi|523525663|ref|YP_008211694.1|	-	390	6.6e-07	16.8	0.4	3	4	0.11	0.33	-1.9	0.2	173	251	239	258	222	284	0.64
YP_008211694.1	Acetyl-CoA acetyltransferase [Acinetobacter baumannii BJAB0868]	Acetyl-CoA acetyltransferase	Acinetobacter baumannii BJAB0868	ketoacyl-synt	PF00109.22	Beta-ketoacyl_synthase_N-terminal_domain	253	gi|523525663|ref|YP_008211694.1|	-	390	6.6e-07	16.8	0.4	4	4	0.11	0.34	-1.9	0	95	114	291	310	289	346	0.67
YP_008211906.1	3-oxoacyl-(acyl-carrier-protein) synthase [Acinetobacter baumannii BJAB0868]	3-oxoacyl-(acyl-carrier-protein) synthase	Acinetobacter baumannii BJAB0868	ketoacyl-synt	PF00109.22	Beta-ketoacyl_synthase_N-terminal_domain	253	gi|523525875|ref|YP_008211906.1|	-	400	1.3e-24	74.8	0.1	1	1	1.3e-24	2e-24	74.2	0.1	87	250	78	240	52	242	0.83
YP_008211906.1	3-oxoacyl-(acyl-carrier-protein) synthase [Acinetobacter baumannii BJAB0868]	3-oxoacyl-(acyl-carrier-protein) synthase	Acinetobacter baumannii BJAB0868	Ketoacyl-synt_C	PF02801.18	Beta-ketoacyl_synthase_C-terminal_domain	118	gi|523525875|ref|YP_008211906.1|	-	400	2.2e-31	96.1	0.6	1	1	3.5e-31	5.3e-31	94.9	0.6	4	113	246	351	244	357	0.94
YP_008211909.1	3-oxoacyl-(acyl-carrier-protein) synthase [Acinetobacter baumannii BJAB0868]	3-oxoacyl-(acyl-carrier-protein) synthase	Acinetobacter baumannii BJAB0868	ketoacyl-synt	PF00109.22	Beta-ketoacyl_synthase_N-terminal_domain	253	gi|523525878|ref|YP_008211909.1|	-	408	1e-45	143.9	2.7	1	1	1e-45	1.5e-45	143.4	2.7	1	253	1	246	1	246	0.89
YP_008211909.1	3-oxoacyl-(acyl-carrier-protein) synthase [Acinetobacter baumannii BJAB0868]	3-oxoacyl-(acyl-carrier-protein) synthase	Acinetobacter baumannii BJAB0868	Ketoacyl-synt_C	PF02801.18	Beta-ketoacyl_synthase_C-terminal_domain	118	gi|523525878|ref|YP_008211909.1|	-	408	3e-33	102.1	0	1	1	4.7e-33	7e-33	100.9	0	1	117	254	362	254	363	0.96
YP_008212198.1	3-oxoacyl-(acyl-carrier-protein) synthase [Acinetobacter baumannii BJAB0868]	3-oxoacyl-(acyl-carrier-protein) synthase	Acinetobacter baumannii BJAB0868	ketoacyl-synt	PF00109.22	Beta-ketoacyl_synthase_N-terminal_domain	253	gi|523526167|ref|YP_008212198.1|	-	409	8.1e-44	137.7	1.4	1	1	1.2e-43	1.8e-43	136.6	1.4	1	253	1	244	1	244	0.87
YP_008212198.1	3-oxoacyl-(acyl-carrier-protein) synthase [Acinetobacter baumannii BJAB0868]	3-oxoacyl-(acyl-carrier-protein) synthase	Acinetobacter baumannii BJAB0868	Ketoacyl-synt_C	PF02801.18	Beta-ketoacyl_synthase_C-terminal_domain	118	gi|523526167|ref|YP_008212198.1|	-	409	2.7e-35	108.8	0.7	1	1	3.2e-35	4.9e-35	107.9	0.7	1	117	252	364	252	365	0.95
YP_008212627.1	3-oxoacyl-[acyl-carrier-protein] synthase III [Acinetobacter baumannii BJAB0868]	3-oxoacyl-acyl-carrier-protein synthase III	Acinetobacter baumannii BJAB0868	ketoacyl-synt	PF00109.22	Beta-ketoacyl_synthase_N-terminal_domain	253	gi|523526596|ref|YP_008212627.1|	-	368	4.4e-09	23.9	1.6	1	2	8e-06	2.4e-05	11.7	0	61	111	71	118	2	133	0.68
YP_008212627.1	3-oxoacyl-[acyl-carrier-protein] synthase III [Acinetobacter baumannii BJAB0868]	3-oxoacyl-acyl-carrier-protein synthase III	Acinetobacter baumannii BJAB0868	ketoacyl-synt	PF00109.22	Beta-ketoacyl_synthase_N-terminal_domain	253	gi|523526596|ref|YP_008212627.1|	-	368	4.4e-09	23.9	1.6	2	2	1e-05	3.1e-05	11.3	0.6	154	199	134	179	122	184	0.86
YP_008212782.1	Acetyl-CoA acetyltransferase [Acinetobacter baumannii BJAB0868]	Acetyl-CoA acetyltransferase	Acinetobacter baumannii BJAB0868	ketoacyl-synt	PF00109.22	Beta-ketoacyl_synthase_N-terminal_domain	253	gi|523526751|ref|YP_008212782.1|	-	402	9.8e-12	32.6	0	1	1	6.9e-12	2.1e-11	31.6	0	167	222	82	136	78	142	0.85
YP_008212828.1	Acetyl-CoA acetyltransferase [Acinetobacter baumannii BJAB0868]	Acetyl-CoA acetyltransferase	Acinetobacter baumannii BJAB0868	ketoacyl-synt	PF00109.22	Beta-ketoacyl_synthase_N-terminal_domain	253	gi|523526797|ref|YP_008212828.1|	-	401	2.3e-07	18.3	0.8	1	2	1.8e-07	5.4e-07	17.1	0.2	170	222	84	135	65	143	0.77
YP_008212828.1	Acetyl-CoA acetyltransferase [Acinetobacter baumannii BJAB0868]	Acetyl-CoA acetyltransferase	Acinetobacter baumannii BJAB0868	ketoacyl-synt	PF00109.22	Beta-ketoacyl_synthase_N-terminal_domain	253	gi|523526797|ref|YP_008212828.1|	-	401	2.3e-07	18.3	0.8	2	2	0.31	0.92	-3.3	0	89	192	363	377	360	391	0.54
YP_008213214.1	Acetyl-CoA acetyltransferase [Acinetobacter baumannii BJAB0868]	Acetyl-CoA acetyltransferase	Acinetobacter baumannii BJAB0868	ketoacyl-synt	PF00109.22	Beta-ketoacyl_synthase_N-terminal_domain	253	gi|523527183|ref|YP_008213214.1|	-	390	3.7e-07	17.6	5.6	1	5	0.0022	0.0033	4.7	0	93	137	31	75	26	86	0.8
YP_008213214.1	Acetyl-CoA acetyltransferase [Acinetobacter baumannii BJAB0868]	Acetyl-CoA acetyltransferase	Acinetobacter baumannii BJAB0868	ketoacyl-synt	PF00109.22	Beta-ketoacyl_synthase_N-terminal_domain	253	gi|523527183|ref|YP_008213214.1|	-	390	3.7e-07	17.6	5.6	2	5	5.8e-06	8.7e-06	13.1	1.2	169	208	82	121	78	131	0.89
YP_008213214.1	Acetyl-CoA acetyltransferase [Acinetobacter baumannii BJAB0868]	Acetyl-CoA acetyltransferase	Acinetobacter baumannii BJAB0868	ketoacyl-synt	PF00109.22	Beta-ketoacyl_synthase_N-terminal_domain	253	gi|523527183|ref|YP_008213214.1|	-	390	3.7e-07	17.6	5.6	3	5	0.37	0.56	-2.6	0	82	101	172	191	148	217	0.65
YP_008213214.1	Acetyl-CoA acetyltransferase [Acinetobacter baumannii BJAB0868]	Acetyl-CoA acetyltransferase	Acinetobacter baumannii BJAB0868	ketoacyl-synt	PF00109.22	Beta-ketoacyl_synthase_N-terminal_domain	253	gi|523527183|ref|YP_008213214.1|	-	390	3.7e-07	17.6	5.6	4	5	0.17	0.25	-1.5	0	234	251	244	261	229	263	0.71
YP_008213214.1	Acetyl-CoA acetyltransferase [Acinetobacter baumannii BJAB0868]	Acetyl-CoA acetyltransferase	Acinetobacter baumannii BJAB0868	ketoacyl-synt	PF00109.22	Beta-ketoacyl_synthase_N-terminal_domain	253	gi|523527183|ref|YP_008213214.1|	-	390	3.7e-07	17.6	5.6	5	5	0.39	0.58	-2.7	0	96	112	295	311	292	350	0.67
YP_008213214.1	Acetyl-CoA acetyltransferase [Acinetobacter baumannii BJAB0868]	Acetyl-CoA acetyltransferase	Acinetobacter baumannii BJAB0868	Ketoacyl-synt_C	PF02801.18	Beta-ketoacyl_synthase_C-terminal_domain	118	gi|523527183|ref|YP_008213214.1|	-	390	6.2e-06	14	0.1	1	2	0.00038	0.00056	7.7	0	14	47	20	51	5	53	0.7
YP_008213214.1	Acetyl-CoA acetyltransferase [Acinetobacter baumannii BJAB0868]	Acetyl-CoA acetyltransferase	Acinetobacter baumannii BJAB0868	Ketoacyl-synt_C	PF02801.18	Beta-ketoacyl_synthase_C-terminal_domain	118	gi|523527183|ref|YP_008213214.1|	-	390	6.2e-06	14	0.1	2	2	0.015	0.022	2.6	0	27	49	292	314	269	367	0.72
YP_008213424.1	Acetyl-CoA acetyltransferase [Acinetobacter baumannii BJAB0868]	Acetyl-CoA acetyltransferase	Acinetobacter baumannii BJAB0868	ketoacyl-synt	PF00109.22	Beta-ketoacyl_synthase_N-terminal_domain	253	gi|523527393|ref|YP_008213424.1|	-	404	4.4e-10	27.2	0.7	1	2	4.8e-10	1.4e-09	25.5	0.2	167	208	82	123	67	142	0.84
YP_008213424.1	Acetyl-CoA acetyltransferase [Acinetobacter baumannii BJAB0868]	Acetyl-CoA acetyltransferase	Acinetobacter baumannii BJAB0868	ketoacyl-synt	PF00109.22	Beta-ketoacyl_synthase_N-terminal_domain	253	gi|523527393|ref|YP_008213424.1|	-	404	4.4e-10	27.2	0.7	2	2	0.046	0.14	-0.6	0	67	110	241	281	189	332	0.73
YP_008213463.1	Acetyl-CoA acetyltransferase [Acinetobacter baumannii BJAB0868]	Acetyl-CoA acetyltransferase	Acinetobacter baumannii BJAB0868	ketoacyl-synt	PF00109.22	Beta-ketoacyl_synthase_N-terminal_domain	253	gi|523527432|ref|YP_008213463.1|	-	403	6.1e-10	26.7	0.6	1	2	4.9e-10	1.5e-09	25.5	0.2	167	208	84	125	69	144	0.84
YP_008213463.1	Acetyl-CoA acetyltransferase [Acinetobacter baumannii BJAB0868]	Acetyl-CoA acetyltransferase	Acinetobacter baumannii BJAB0868	ketoacyl-synt	PF00109.22	Beta-ketoacyl_synthase_N-terminal_domain	253	gi|523527432|ref|YP_008213463.1|	-	403	6.1e-10	26.7	0.6	2	2	0.14	0.41	-2.2	0	80	107	256	280	208	324	0.65
YP_008213618.1	Acetyl-CoA acetyltransferase [Acinetobacter baumannii BJAB0868]	Acetyl-CoA acetyltransferase	Acinetobacter baumannii BJAB0868	ketoacyl-synt	PF00109.22	Beta-ketoacyl_synthase_N-terminal_domain	253	gi|523527587|ref|YP_008213618.1|	-	522	2.6e-07	18.1	0.1	1	1	2.4e-07	7.3e-07	16.7	0.1	166	206	177	217	168	231	0.82
YP_008213943.1	Non-ribosomal peptide synthetase modules-related protein [Acinetobacter baumannii BJAB0868]	Non-ribosomal peptide synthetase modules-related protein	Acinetobacter baumannii BJAB0868	Condensation	PF00668.16	Condensation_domain	301	gi|523527912|ref|YP_008213943.1|	-	980	4.3e-55	174.5	14.5	1	2	1.5e-36	4.4e-36	112.1	1.2	4	301	26	321	23	321	0.9
YP_008213943.1	Non-ribosomal peptide synthetase modules-related protein [Acinetobacter baumannii BJAB0868]	Non-ribosomal peptide synthetase modules-related protein	Acinetobacter baumannii BJAB0868	Condensation	PF00668.16	Condensation_domain	301	gi|523527912|ref|YP_008213943.1|	-	980	4.3e-55	174.5	14.5	2	2	6.7e-23	2e-22	67.2	6.2	6	272	472	726	468	728	0.9
YP_008213951.1	Non-ribosomal peptide synthetase modules-related protein [Acinetobacter baumannii BJAB0868]	Non-ribosomal peptide synthetase modules-related protein	Acinetobacter baumannii BJAB0868	Condensation	PF00668.16	Condensation_domain	301	gi|523527920|ref|YP_008213951.1|	-	698	2.3e-47	149.2	13.7	1	2	7e-05	0.00021	8.1	3.2	14	160	21	160	12	213	0.78
YP_008213951.1	Non-ribosomal peptide synthetase modules-related protein [Acinetobacter baumannii BJAB0868]	Non-ribosomal peptide synthetase modules-related protein	Acinetobacter baumannii BJAB0868	Condensation	PF00668.16	Condensation_domain	301	gi|523527920|ref|YP_008213951.1|	-	698	2.3e-47	149.2	13.7	2	2	4.6e-47	1.4e-46	146.6	2.9	3	299	275	567	273	569	0.9
YP_008214392.1	hypothetical protein BJAB0868_03068 [Acinetobacter baumannii BJAB0868]	hypothetical protein BJAB0868_03068	Acinetobacter baumannii BJAB0868	Condensation	PF00668.16	Condensation_domain	301	gi|523528361|ref|YP_008214392.1|	-	461	1e-09	25.5	0.2	1	2	5.8e-07	1.7e-06	14.9	0.1	82	154	79	151	67	175	0.72
YP_008214392.1	hypothetical protein BJAB0868_03068 [Acinetobacter baumannii BJAB0868]	hypothetical protein BJAB0868_03068	Acinetobacter baumannii BJAB0868	Condensation	PF00668.16	Condensation_domain	301	gi|523528361|ref|YP_008214392.1|	-	461	1e-09	25.5	0.2	2	2	5.3e-05	0.00016	8.5	0	224	261	237	274	205	309	0.8
YP_008214461.1	Acetyl-CoA acetyltransferase [Acinetobacter baumannii BJAB0868]	Acetyl-CoA acetyltransferase	Acinetobacter baumannii BJAB0868	ketoacyl-synt	PF00109.22	Beta-ketoacyl_synthase_N-terminal_domain	253	gi|523528430|ref|YP_008214461.1|	-	391	3.3e-08	21	6.9	1	4	0.00096	0.0029	4.9	0	91	127	29	65	26	85	0.77
YP_008214461.1	Acetyl-CoA acetyltransferase [Acinetobacter baumannii BJAB0868]	Acetyl-CoA acetyltransferase	Acinetobacter baumannii BJAB0868	ketoacyl-synt	PF00109.22	Beta-ketoacyl_synthase_N-terminal_domain	253	gi|523528430|ref|YP_008214461.1|	-	391	3.3e-08	21	6.9	2	4	7e-08	2.1e-07	18.4	1.3	169	208	82	121	76	136	0.87
YP_008214461.1	Acetyl-CoA acetyltransferase [Acinetobacter baumannii BJAB0868]	Acetyl-CoA acetyltransferase	Acinetobacter baumannii BJAB0868	ketoacyl-synt	PF00109.22	Beta-ketoacyl_synthase_N-terminal_domain	253	gi|523528430|ref|YP_008214461.1|	-	391	3.3e-08	21	6.9	3	4	0.25	0.74	-3	0	113	136	151	174	145	198	0.56
YP_008214461.1	Acetyl-CoA acetyltransferase [Acinetobacter baumannii BJAB0868]	Acetyl-CoA acetyltransferase	Acinetobacter baumannii BJAB0868	ketoacyl-synt	PF00109.22	Beta-ketoacyl_synthase_N-terminal_domain	253	gi|523528430|ref|YP_008214461.1|	-	391	3.3e-08	21	6.9	4	4	0.22	0.66	-2.8	0.1	233	251	243	261	233	263	0.67
YP_008214471.1	Acetyl-CoA acetyltransferase [Acinetobacter baumannii BJAB0868]	Acetyl-CoA acetyltransferase	Acinetobacter baumannii BJAB0868	ketoacyl-synt	PF00109.22	Beta-ketoacyl_synthase_N-terminal_domain	253	gi|523528440|ref|YP_008214471.1|	-	401	4.3e-10	27.3	0.1	1	2	1.2e-09	3.7e-09	24.2	0	175	206	91	122	73	145	0.92
YP_008214471.1	Acetyl-CoA acetyltransferase [Acinetobacter baumannii BJAB0868]	Acetyl-CoA acetyltransferase	Acinetobacter baumannii BJAB0868	ketoacyl-synt	PF00109.22	Beta-ketoacyl_synthase_N-terminal_domain	253	gi|523528440|ref|YP_008214471.1|	-	401	4.3e-10	27.3	0.1	2	2	0.028	0.085	0.1	0	95	114	304	323	292	364	0.81
YP_007594673.1	long-chain fatty acid CoA ligase [Acinetobacter baumannii D1279779]	long-chain fatty acid CoA ligase	Acinetobacter baumannii D1279779	Condensation	PF00668.16	Condensation_domain	301	gi|469820303|ref|YP_007594673.1|	-	1319	5.9e-49	154.4	0	1	1	4.6e-49	1.4e-48	153.2	0	7	300	17	305	13	306	0.93
YP_007594834.1	3-ketoacyl-CoA thiolase [Acinetobacter baumannii D1279779]	3-ketoacyl-CoA thiolase	Acinetobacter baumannii D1279779	ketoacyl-synt	PF00109.22	Beta-ketoacyl_synthase_N-terminal_domain	253	gi|469820464|ref|YP_007594834.1|	-	390	6.6e-07	16.8	0.4	1	4	0.44	1.3	-3.9	0	195	219	8	32	7	36	0.72
YP_007594834.1	3-ketoacyl-CoA thiolase [Acinetobacter baumannii D1279779]	3-ketoacyl-CoA thiolase	Acinetobacter baumannii D1279779	ketoacyl-synt	PF00109.22	Beta-ketoacyl_synthase_N-terminal_domain	253	gi|469820464|ref|YP_007594834.1|	-	390	6.6e-07	16.8	0.4	2	4	2.2e-07	6.6e-07	16.8	0.4	174	218	94	138	88	155	0.86
YP_007594834.1	3-ketoacyl-CoA thiolase [Acinetobacter baumannii D1279779]	3-ketoacyl-CoA thiolase	Acinetobacter baumannii D1279779	ketoacyl-synt	PF00109.22	Beta-ketoacyl_synthase_N-terminal_domain	253	gi|469820464|ref|YP_007594834.1|	-	390	6.6e-07	16.8	0.4	3	4	0.11	0.33	-1.9	0.2	173	251	239	258	222	284	0.64
YP_007594834.1	3-ketoacyl-CoA thiolase [Acinetobacter baumannii D1279779]	3-ketoacyl-CoA thiolase	Acinetobacter baumannii D1279779	ketoacyl-synt	PF00109.22	Beta-ketoacyl_synthase_N-terminal_domain	253	gi|469820464|ref|YP_007594834.1|	-	390	6.6e-07	16.8	0.4	4	4	0.11	0.34	-1.9	0	95	114	291	310	289	346	0.67
YP_007595044.1	putative 3-oxoacyl-[ACP] synthase FabV [Acinetobacter baumannii D1279779]	putative 3-oxoacyl-ACP synthase FabV	Acinetobacter baumannii D1279779	ketoacyl-synt	PF00109.22	Beta-ketoacyl_synthase_N-terminal_domain	253	gi|469820674|ref|YP_007595044.1|	-	400	2e-24	74.2	0	1	2	2.5e-24	3.7e-24	73.3	0	88	250	79	240	32	242	0.85
YP_007595044.1	putative 3-oxoacyl-[ACP] synthase FabV [Acinetobacter baumannii D1279779]	putative 3-oxoacyl-ACP synthase FabV	Acinetobacter baumannii D1279779	ketoacyl-synt	PF00109.22	Beta-ketoacyl_synthase_N-terminal_domain	253	gi|469820674|ref|YP_007595044.1|	-	400	2e-24	74.2	0	2	2	0.77	1.1	-3.6	0	95	124	306	334	301	371	0.67
YP_007595044.1	putative 3-oxoacyl-[ACP] synthase FabV [Acinetobacter baumannii D1279779]	putative 3-oxoacyl-ACP synthase FabV	Acinetobacter baumannii D1279779	Ketoacyl-synt_C	PF02801.18	Beta-ketoacyl_synthase_C-terminal_domain	118	gi|469820674|ref|YP_007595044.1|	-	400	1.2e-31	97	0.3	1	1	2.1e-31	3.1e-31	95.6	0.3	4	113	246	351	244	357	0.93
YP_007595047.1	3-oxoacyl-[ACP] synthase [Acinetobacter baumannii D1279779]	3-oxoacyl-ACP synthase	Acinetobacter baumannii D1279779	ketoacyl-synt	PF00109.22	Beta-ketoacyl_synthase_N-terminal_domain	253	gi|469820677|ref|YP_007595047.1|	-	408	5.4e-45	141.6	2.8	1	1	5.4e-45	8.1e-45	141	2.8	1	253	1	246	1	246	0.89
YP_007595047.1	3-oxoacyl-[ACP] synthase [Acinetobacter baumannii D1279779]	3-oxoacyl-ACP synthase	Acinetobacter baumannii D1279779	Ketoacyl-synt_C	PF02801.18	Beta-ketoacyl_synthase_C-terminal_domain	118	gi|469820677|ref|YP_007595047.1|	-	408	3e-33	102.1	0	1	1	4.7e-33	7e-33	100.9	0	1	117	254	362	254	363	0.96
YP_007595361.1	3-oxoacyl-[acyl-carrier-protein] synthase [Acinetobacter baumannii D1279779]	3-oxoacyl-acyl-carrier-protein synthase	Acinetobacter baumannii D1279779	ketoacyl-synt	PF00109.22	Beta-ketoacyl_synthase_N-terminal_domain	253	gi|469820991|ref|YP_007595361.1|	-	409	9.2e-44	137.6	1.4	1	1	1.2e-43	1.8e-43	136.6	1.4	1	253	1	244	1	244	0.87
YP_007595361.1	3-oxoacyl-[acyl-carrier-protein] synthase [Acinetobacter baumannii D1279779]	3-oxoacyl-acyl-carrier-protein synthase	Acinetobacter baumannii D1279779	Ketoacyl-synt_C	PF02801.18	Beta-ketoacyl_synthase_C-terminal_domain	118	gi|469820991|ref|YP_007595361.1|	-	409	1.8e-35	109.3	0.7	1	1	2.2e-35	3.2e-35	108.5	0.7	1	117	252	364	252	365	0.95
YP_007595766.1	3-oxoacyl-[acyl-carrier-protein] synthase III [Acinetobacter baumannii D1279779]	3-oxoacyl-acyl-carrier-protein synthase III	Acinetobacter baumannii D1279779	ketoacyl-synt	PF00109.22	Beta-ketoacyl_synthase_N-terminal_domain	253	gi|469821396|ref|YP_007595766.1|	-	368	4.4e-09	23.9	1.6	1	2	8e-06	2.4e-05	11.7	0	61	111	71	118	2	133	0.68
YP_007595766.1	3-oxoacyl-[acyl-carrier-protein] synthase III [Acinetobacter baumannii D1279779]	3-oxoacyl-acyl-carrier-protein synthase III	Acinetobacter baumannii D1279779	ketoacyl-synt	PF00109.22	Beta-ketoacyl_synthase_N-terminal_domain	253	gi|469821396|ref|YP_007595766.1|	-	368	4.4e-09	23.9	1.6	2	2	1e-05	3.1e-05	11.3	0.6	154	199	134	179	122	184	0.86
YP_007595902.1	phenylacetate degradation beta-ketoadipyl CoA thiolase [Acinetobacter baumannii D1279779]	phenylacetate degradation beta-ketoadipyl CoA thiolase	Acinetobacter baumannii D1279779	ketoacyl-synt	PF00109.22	Beta-ketoacyl_synthase_N-terminal_domain	253	gi|469821532|ref|YP_007595902.1|	-	402	9.9e-12	32.6	0	1	1	6.9e-12	2.1e-11	31.6	0	167	222	82	136	78	142	0.85
YP_007596270.1	acetyl-CoA acetyltransferase [Acinetobacter baumannii D1279779]	acetyl-CoA acetyltransferase	Acinetobacter baumannii D1279779	ketoacyl-synt	PF00109.22	Beta-ketoacyl_synthase_N-terminal_domain	253	gi|469821900|ref|YP_007596270.1|	-	390	7.3e-07	16.7	6.1	1	5	0.0013	0.004	4.4	0	93	137	31	75	26	86	0.79
YP_007596270.1	acetyl-CoA acetyltransferase [Acinetobacter baumannii D1279779]	acetyl-CoA acetyltransferase	Acinetobacter baumannii D1279779	ketoacyl-synt	PF00109.22	Beta-ketoacyl_synthase_N-terminal_domain	253	gi|469821900|ref|YP_007596270.1|	-	390	7.3e-07	16.7	6.1	2	5	2.8e-06	8.3e-06	13.2	1.1	169	208	82	121	78	131	0.89
YP_007596270.1	acetyl-CoA acetyltransferase [Acinetobacter baumannii D1279779]	acetyl-CoA acetyltransferase	Acinetobacter baumannii D1279779	ketoacyl-synt	PF00109.22	Beta-ketoacyl_synthase_N-terminal_domain	253	gi|469821900|ref|YP_007596270.1|	-	390	7.3e-07	16.7	6.1	3	5	0.29	0.88	-3.3	0	82	97	172	187	147	199	0.52
YP_007596270.1	acetyl-CoA acetyltransferase [Acinetobacter baumannii D1279779]	acetyl-CoA acetyltransferase	Acinetobacter baumannii D1279779	ketoacyl-synt	PF00109.22	Beta-ketoacyl_synthase_N-terminal_domain	253	gi|469821900|ref|YP_007596270.1|	-	390	7.3e-07	16.7	6.1	4	5	0.091	0.27	-1.6	0	234	251	244	261	232	263	0.7
YP_007596270.1	acetyl-CoA acetyltransferase [Acinetobacter baumannii D1279779]	acetyl-CoA acetyltransferase	Acinetobacter baumannii D1279779	ketoacyl-synt	PF00109.22	Beta-ketoacyl_synthase_N-terminal_domain	253	gi|469821900|ref|YP_007596270.1|	-	390	7.3e-07	16.7	6.1	5	5	0.19	0.58	-2.7	0	96	112	295	311	292	350	0.67
YP_007596418.1	beta-ketoadipyl CoA thiolase [Acinetobacter baumannii D1279779]	beta-ketoadipyl CoA thiolase	Acinetobacter baumannii D1279779	ketoacyl-synt	PF00109.22	Beta-ketoacyl_synthase_N-terminal_domain	253	gi|469822048|ref|YP_007596418.1|	-	404	7.5e-10	26.4	0.6	1	2	5e-10	1.5e-09	25.5	0.2	167	208	82	123	67	142	0.84
YP_007596418.1	beta-ketoadipyl CoA thiolase [Acinetobacter baumannii D1279779]	beta-ketoadipyl CoA thiolase	Acinetobacter baumannii D1279779	ketoacyl-synt	PF00109.22	Beta-ketoacyl_synthase_N-terminal_domain	253	gi|469822048|ref|YP_007596418.1|	-	404	7.5e-10	26.4	0.6	2	2	0.38	1.1	-3.6	0	88	107	259	278	232	293	0.6
YP_007596457.1	beta-ketoadipyl CoA thiolase [Acinetobacter baumannii D1279779]	beta-ketoadipyl CoA thiolase	Acinetobacter baumannii D1279779	ketoacyl-synt	PF00109.22	Beta-ketoacyl_synthase_N-terminal_domain	253	gi|469822087|ref|YP_007596457.1|	-	403	5e-10	27	1	1	2	4.9e-10	1.5e-09	25.5	0.2	167	208	84	125	69	144	0.84
YP_007596457.1	beta-ketoadipyl CoA thiolase [Acinetobacter baumannii D1279779]	beta-ketoadipyl CoA thiolase	Acinetobacter baumannii D1279779	ketoacyl-synt	PF00109.22	Beta-ketoacyl_synthase_N-terminal_domain	253	gi|469822087|ref|YP_007596457.1|	-	403	5e-10	27	1	2	2	0.043	0.13	-0.5	0	67	110	243	283	191	337	0.72
YP_007596604.1	acetyl-CoA acetyltransferase [Acinetobacter baumannii D1279779]	acetyl-CoA acetyltransferase	Acinetobacter baumannii D1279779	ketoacyl-synt	PF00109.22	Beta-ketoacyl_synthase_N-terminal_domain	253	gi|469822234|ref|YP_007596604.1|	-	522	2.2e-07	18.4	0.1	1	1	2.4e-07	7.3e-07	16.7	0.1	166	206	177	217	168	231	0.82
YP_007596923.1	acinetobactin biosynthesis protein [Acinetobacter baumannii D1279779]	acinetobactin biosynthesis protein	Acinetobacter baumannii D1279779	Condensation	PF00668.16	Condensation_domain	301	gi|469822553|ref|YP_007596923.1|	-	980	2.1e-56	178.8	12.4	1	2	7e-36	2.1e-35	109.9	1	4	301	26	321	23	321	0.89
YP_007596923.1	acinetobactin biosynthesis protein [Acinetobacter baumannii D1279779]	acinetobactin biosynthesis protein	Acinetobacter baumannii D1279779	Condensation	PF00668.16	Condensation_domain	301	gi|469822553|ref|YP_007596923.1|	-	980	2.1e-56	178.8	12.4	2	2	1.1e-24	3.2e-24	73.1	4.6	6	272	472	726	468	728	0.91
YP_007596930.1	non-ribosomal peptide synthase [Acinetobacter baumannii D1279779]	non-ribosomal peptide synthase	Acinetobacter baumannii D1279779	Condensation	PF00668.16	Condensation_domain	301	gi|469822560|ref|YP_007596930.1|	-	697	3e-48	152.1	9.7	1	2	1.1e-05	3.4e-05	10.7	0.7	13	139	20	139	12	191	0.78
YP_007596930.1	non-ribosomal peptide synthase [Acinetobacter baumannii D1279779]	non-ribosomal peptide synthase	Acinetobacter baumannii D1279779	Condensation	PF00668.16	Condensation_domain	301	gi|469822560|ref|YP_007596930.1|	-	697	3e-48	152.1	9.7	2	2	8.3e-47	2.5e-46	145.8	2.6	3	299	274	566	272	568	0.93
YP_007597267.1	wax ester synthase/acyl-CoA:diacylglycerol acyltransferase [Acinetobacter baumannii D1279779]	wax ester synthase/acyl-CoA:diacylglycerol acyltransferase	Acinetobacter baumannii D1279779	Condensation	PF00668.16	Condensation_domain	301	gi|469822897|ref|YP_007597267.1|	-	461	6.7e-10	26.1	0.1	1	2	4e-07	1.2e-06	15.4	0.1	82	157	79	154	67	181	0.73
YP_007597267.1	wax ester synthase/acyl-CoA:diacylglycerol acyltransferase [Acinetobacter baumannii D1279779]	wax ester synthase/acyl-CoA:diacylglycerol acyltransferase	Acinetobacter baumannii D1279779	Condensation	PF00668.16	Condensation_domain	301	gi|469822897|ref|YP_007597267.1|	-	461	6.7e-10	26.1	0.1	2	2	4.9e-05	0.00015	8.6	0	224	261	237	274	205	310	0.79
YP_007597333.1	acetyl-CoA acetyltransferasee [Acinetobacter baumannii D1279779]	acetyl-CoA acetyltransferasee	Acinetobacter baumannii D1279779	ketoacyl-synt	PF00109.22	Beta-ketoacyl_synthase_N-terminal_domain	253	gi|469822963|ref|YP_007597333.1|	-	391	2.8e-08	21.3	6.6	1	4	0.00096	0.0029	4.9	0	91	127	29	65	26	85	0.77
YP_007597333.1	acetyl-CoA acetyltransferasee [Acinetobacter baumannii D1279779]	acetyl-CoA acetyltransferasee	Acinetobacter baumannii D1279779	ketoacyl-synt	PF00109.22	Beta-ketoacyl_synthase_N-terminal_domain	253	gi|469822963|ref|YP_007597333.1|	-	391	2.8e-08	21.3	6.6	2	4	7e-08	2.1e-07	18.4	1.3	169	208	82	121	76	136	0.87
YP_007597333.1	acetyl-CoA acetyltransferasee [Acinetobacter baumannii D1279779]	acetyl-CoA acetyltransferasee	Acinetobacter baumannii D1279779	ketoacyl-synt	PF00109.22	Beta-ketoacyl_synthase_N-terminal_domain	253	gi|469822963|ref|YP_007597333.1|	-	391	2.8e-08	21.3	6.6	3	4	0.25	0.76	-3.1	0	113	136	151	174	145	197	0.57
YP_007597333.1	acetyl-CoA acetyltransferasee [Acinetobacter baumannii D1279779]	acetyl-CoA acetyltransferasee	Acinetobacter baumannii D1279779	ketoacyl-synt	PF00109.22	Beta-ketoacyl_synthase_N-terminal_domain	253	gi|469822963|ref|YP_007597333.1|	-	391	2.8e-08	21.3	6.6	4	4	0.24	0.71	-3	0	233	251	243	261	234	263	0.67
YP_007597341.1	acetyl-CoA acetyltransferase [Acinetobacter baumannii D1279779]	acetyl-CoA acetyltransferase	Acinetobacter baumannii D1279779	ketoacyl-synt	PF00109.22	Beta-ketoacyl_synthase_N-terminal_domain	253	gi|469822971|ref|YP_007597341.1|	-	401	4.2e-10	27.3	0.1	1	2	1.2e-09	3.7e-09	24.2	0	175	206	91	122	73	145	0.92
YP_007597341.1	acetyl-CoA acetyltransferase [Acinetobacter baumannii D1279779]	acetyl-CoA acetyltransferase	Acinetobacter baumannii D1279779	ketoacyl-synt	PF00109.22	Beta-ketoacyl_synthase_N-terminal_domain	253	gi|469822971|ref|YP_007597341.1|	-	401	4.2e-10	27.3	0.1	2	2	0.028	0.085	0.1	0	95	114	304	323	292	364	0.81
YP_006288540.1	acetyl-CoA acetyltransferase [Acinetobacter baumannii MDR-TJ]	acetyl-CoA acetyltransferase	Acinetobacter baumannii MDR-TJ	ketoacyl-synt	PF00109.22	Beta-ketoacyl_synthase_N-terminal_domain	253	gi|387122658|ref|YP_006288540.1|	-	401	4.3e-10	27.3	0.1	1	2	1.2e-09	3.7e-09	24.2	0	175	206	91	122	73	145	0.92
YP_006288540.1	acetyl-CoA acetyltransferase [Acinetobacter baumannii MDR-TJ]	acetyl-CoA acetyltransferase	Acinetobacter baumannii MDR-TJ	ketoacyl-synt	PF00109.22	Beta-ketoacyl_synthase_N-terminal_domain	253	gi|387122658|ref|YP_006288540.1|	-	401	4.3e-10	27.3	0.1	2	2	0.028	0.085	0.1	0	95	114	304	323	292	364	0.81
YP_006288549.1	acetyl-CoA acetyltransferase [Acinetobacter baumannii MDR-TJ]	acetyl-CoA acetyltransferase	Acinetobacter baumannii MDR-TJ	ketoacyl-synt	PF00109.22	Beta-ketoacyl_synthase_N-terminal_domain	253	gi|387122667|ref|YP_006288549.1|	-	391	3.3e-08	21	6.9	1	4	0.00096	0.0029	4.9	0	91	127	29	65	26	85	0.77
YP_006288549.1	acetyl-CoA acetyltransferase [Acinetobacter baumannii MDR-TJ]	acetyl-CoA acetyltransferase	Acinetobacter baumannii MDR-TJ	ketoacyl-synt	PF00109.22	Beta-ketoacyl_synthase_N-terminal_domain	253	gi|387122667|ref|YP_006288549.1|	-	391	3.3e-08	21	6.9	2	4	7e-08	2.1e-07	18.4	1.3	169	208	82	121	76	136	0.87
YP_006288549.1	acetyl-CoA acetyltransferase [Acinetobacter baumannii MDR-TJ]	acetyl-CoA acetyltransferase	Acinetobacter baumannii MDR-TJ	ketoacyl-synt	PF00109.22	Beta-ketoacyl_synthase_N-terminal_domain	253	gi|387122667|ref|YP_006288549.1|	-	391	3.3e-08	21	6.9	3	4	0.25	0.74	-3	0	113	136	151	174	145	198	0.56
YP_006288549.1	acetyl-CoA acetyltransferase [Acinetobacter baumannii MDR-TJ]	acetyl-CoA acetyltransferase	Acinetobacter baumannii MDR-TJ	ketoacyl-synt	PF00109.22	Beta-ketoacyl_synthase_N-terminal_domain	253	gi|387122667|ref|YP_006288549.1|	-	391	3.3e-08	21	6.9	4	4	0.22	0.66	-2.8	0.1	233	251	243	261	233	263	0.67
YP_006288616.1	acyltransferase, WS/DGAT/MGAT [Acinetobacter baumannii MDR-TJ]	acyltransferase, WS/DGAT/MGAT	Acinetobacter baumannii MDR-TJ	Condensation	PF00668.16	Condensation_domain	301	gi|387122734|ref|YP_006288616.1|	-	461	1e-09	25.5	0.2	1	2	5.8e-07	1.7e-06	14.9	0.1	82	154	79	151	67	175	0.72
YP_006288616.1	acyltransferase, WS/DGAT/MGAT [Acinetobacter baumannii MDR-TJ]	acyltransferase, WS/DGAT/MGAT	Acinetobacter baumannii MDR-TJ	Condensation	PF00668.16	Condensation_domain	301	gi|387122734|ref|YP_006288616.1|	-	461	1e-09	25.5	0.2	2	2	5.3e-05	0.00016	8.5	0	224	261	237	274	205	309	0.8
YP_006289041.1	non-ribosomal peptide synthase [Acinetobacter baumannii MDR-TJ]	non-ribosomal peptide synthase	Acinetobacter baumannii MDR-TJ	Condensation	PF00668.16	Condensation_domain	301	gi|387123159|ref|YP_006289041.1|	-	698	2.3e-47	149.2	13.7	1	2	7e-05	0.00021	8.1	3.2	14	160	21	160	12	213	0.78
YP_006289041.1	non-ribosomal peptide synthase [Acinetobacter baumannii MDR-TJ]	non-ribosomal peptide synthase	Acinetobacter baumannii MDR-TJ	Condensation	PF00668.16	Condensation_domain	301	gi|387123159|ref|YP_006289041.1|	-	698	2.3e-47	149.2	13.7	2	2	4.6e-47	1.4e-46	146.6	2.9	3	299	275	567	273	569	0.9
YP_006289050.1	non-ribosomal peptide synthase [Acinetobacter baumannii MDR-TJ]	non-ribosomal peptide synthase	Acinetobacter baumannii MDR-TJ	Condensation	PF00668.16	Condensation_domain	301	gi|387123168|ref|YP_006289050.1|	-	980	4.3e-55	174.5	14.5	1	2	1.5e-36	4.4e-36	112.1	1.2	4	301	26	321	23	321	0.9
YP_006289050.1	non-ribosomal peptide synthase [Acinetobacter baumannii MDR-TJ]	non-ribosomal peptide synthase	Acinetobacter baumannii MDR-TJ	Condensation	PF00668.16	Condensation_domain	301	gi|387123168|ref|YP_006289050.1|	-	980	4.3e-55	174.5	14.5	2	2	6.7e-23	2e-22	67.2	6.2	6	272	472	726	468	728	0.9
YP_006289391.1	acetyl-CoA acetyltransferase [Acinetobacter baumannii MDR-TJ]	acetyl-CoA acetyltransferase	Acinetobacter baumannii MDR-TJ	ketoacyl-synt	PF00109.22	Beta-ketoacyl_synthase_N-terminal_domain	253	gi|387123509|ref|YP_006289391.1|	-	522	2.6e-07	18.1	0.1	1	1	2.4e-07	7.3e-07	16.7	0.1	166	206	177	217	168	231	0.82
YP_006289608.1	3-oxoadipyl-CoA thiolase [Acinetobacter baumannii MDR-TJ]	3-oxoadipyl-CoA thiolase	Acinetobacter baumannii MDR-TJ	ketoacyl-synt	PF00109.22	Beta-ketoacyl_synthase_N-terminal_domain	253	gi|387123726|ref|YP_006289608.1|	-	403	6.1e-10	26.7	0.6	1	2	4.9e-10	1.5e-09	25.5	0.2	167	208	84	125	69	144	0.84
YP_006289608.1	3-oxoadipyl-CoA thiolase [Acinetobacter baumannii MDR-TJ]	3-oxoadipyl-CoA thiolase	Acinetobacter baumannii MDR-TJ	ketoacyl-synt	PF00109.22	Beta-ketoacyl_synthase_N-terminal_domain	253	gi|387123726|ref|YP_006289608.1|	-	403	6.1e-10	26.7	0.6	2	2	0.14	0.41	-2.2	0	80	107	256	280	208	324	0.65
YP_006289647.1	3-oxoadipyl-CoA thiolase [Acinetobacter baumannii MDR-TJ]	3-oxoadipyl-CoA thiolase	Acinetobacter baumannii MDR-TJ	ketoacyl-synt	PF00109.22	Beta-ketoacyl_synthase_N-terminal_domain	253	gi|387123765|ref|YP_006289647.1|	-	404	4.4e-10	27.2	0.7	1	2	4.8e-10	1.4e-09	25.5	0.2	167	208	82	123	67	142	0.84
YP_006289647.1	3-oxoadipyl-CoA thiolase [Acinetobacter baumannii MDR-TJ]	3-oxoadipyl-CoA thiolase	Acinetobacter baumannii MDR-TJ	ketoacyl-synt	PF00109.22	Beta-ketoacyl_synthase_N-terminal_domain	253	gi|387123765|ref|YP_006289647.1|	-	404	4.4e-10	27.2	0.7	2	2	0.046	0.14	-0.6	0	67	110	241	281	189	332	0.73
YP_006289839.1	acetyl-CoA acetyltransferase [Acinetobacter baumannii MDR-TJ]	acetyl-CoA acetyltransferase	Acinetobacter baumannii MDR-TJ	ketoacyl-synt	PF00109.22	Beta-ketoacyl_synthase_N-terminal_domain	253	gi|387123957|ref|YP_006289839.1|	-	390	3.7e-07	17.6	5.6	1	5	0.0022	0.0033	4.7	0	93	137	31	75	26	86	0.8
YP_006289839.1	acetyl-CoA acetyltransferase [Acinetobacter baumannii MDR-TJ]	acetyl-CoA acetyltransferase	Acinetobacter baumannii MDR-TJ	ketoacyl-synt	PF00109.22	Beta-ketoacyl_synthase_N-terminal_domain	253	gi|387123957|ref|YP_006289839.1|	-	390	3.7e-07	17.6	5.6	2	5	5.8e-06	8.7e-06	13.1	1.2	169	208	82	121	78	131	0.89
YP_006289839.1	acetyl-CoA acetyltransferase [Acinetobacter baumannii MDR-TJ]	acetyl-CoA acetyltransferase	Acinetobacter baumannii MDR-TJ	ketoacyl-synt	PF00109.22	Beta-ketoacyl_synthase_N-terminal_domain	253	gi|387123957|ref|YP_006289839.1|	-	390	3.7e-07	17.6	5.6	3	5	0.37	0.56	-2.6	0	82	101	172	191	148	217	0.65
YP_006289839.1	acetyl-CoA acetyltransferase [Acinetobacter baumannii MDR-TJ]	acetyl-CoA acetyltransferase	Acinetobacter baumannii MDR-TJ	ketoacyl-synt	PF00109.22	Beta-ketoacyl_synthase_N-terminal_domain	253	gi|387123957|ref|YP_006289839.1|	-	390	3.7e-07	17.6	5.6	4	5	0.17	0.25	-1.5	0	234	251	244	261	229	263	0.71
YP_006289839.1	acetyl-CoA acetyltransferase [Acinetobacter baumannii MDR-TJ]	acetyl-CoA acetyltransferase	Acinetobacter baumannii MDR-TJ	ketoacyl-synt	PF00109.22	Beta-ketoacyl_synthase_N-terminal_domain	253	gi|387123957|ref|YP_006289839.1|	-	390	3.7e-07	17.6	5.6	5	5	0.39	0.58	-2.7	0	96	112	295	311	292	350	0.67
YP_006289839.1	acetyl-CoA acetyltransferase [Acinetobacter baumannii MDR-TJ]	acetyl-CoA acetyltransferase	Acinetobacter baumannii MDR-TJ	Ketoacyl-synt_C	PF02801.18	Beta-ketoacyl_synthase_C-terminal_domain	118	gi|387123957|ref|YP_006289839.1|	-	390	6.2e-06	14	0.1	1	2	0.00038	0.00056	7.7	0	14	47	20	51	5	53	0.7
YP_006289839.1	acetyl-CoA acetyltransferase [Acinetobacter baumannii MDR-TJ]	acetyl-CoA acetyltransferase	Acinetobacter baumannii MDR-TJ	Ketoacyl-synt_C	PF02801.18	Beta-ketoacyl_synthase_C-terminal_domain	118	gi|387123957|ref|YP_006289839.1|	-	390	6.2e-06	14	0.1	2	2	0.015	0.022	2.6	0	27	49	292	314	269	367	0.72
YP_006290213.1	acetyl-CoA acetyltransferase [Acinetobacter baumannii MDR-TJ]	acetyl-CoA acetyltransferase	Acinetobacter baumannii MDR-TJ	ketoacyl-synt	PF00109.22	Beta-ketoacyl_synthase_N-terminal_domain	253	gi|387124331|ref|YP_006290213.1|	-	401	2.3e-07	18.3	0.8	1	2	1.8e-07	5.4e-07	17.1	0.2	170	222	84	135	65	143	0.77
YP_006290213.1	acetyl-CoA acetyltransferase [Acinetobacter baumannii MDR-TJ]	acetyl-CoA acetyltransferase	Acinetobacter baumannii MDR-TJ	ketoacyl-synt	PF00109.22	Beta-ketoacyl_synthase_N-terminal_domain	253	gi|387124331|ref|YP_006290213.1|	-	401	2.3e-07	18.3	0.8	2	2	0.31	0.92	-3.3	0	89	192	363	377	360	391	0.54
YP_006290256.1	3-oxoadipyl-CoA thiolase [Acinetobacter baumannii MDR-TJ]	3-oxoadipyl-CoA thiolase	Acinetobacter baumannii MDR-TJ	ketoacyl-synt	PF00109.22	Beta-ketoacyl_synthase_N-terminal_domain	253	gi|387124374|ref|YP_006290256.1|	-	402	9.8e-12	32.6	0	1	1	6.9e-12	2.1e-11	31.6	0	167	222	82	136	78	142	0.85
YP_006290411.1	3-oxoacyl-(acyl-carrier-protein) synthase III [Acinetobacter baumannii MDR-TJ]	3-oxoacyl-(acyl-carrier-protein) synthase III	Acinetobacter baumannii MDR-TJ	ketoacyl-synt	PF00109.22	Beta-ketoacyl_synthase_N-terminal_domain	253	gi|387124529|ref|YP_006290411.1|	-	368	4.4e-09	23.9	1.6	1	2	8e-06	2.4e-05	11.7	0	61	111	71	118	2	133	0.68
YP_006290411.1	3-oxoacyl-(acyl-carrier-protein) synthase III [Acinetobacter baumannii MDR-TJ]	3-oxoacyl-(acyl-carrier-protein) synthase III	Acinetobacter baumannii MDR-TJ	ketoacyl-synt	PF00109.22	Beta-ketoacyl_synthase_N-terminal_domain	253	gi|387124529|ref|YP_006290411.1|	-	368	4.4e-09	23.9	1.6	2	2	1e-05	3.1e-05	11.3	0.6	154	199	134	179	122	184	0.86
YP_006290835.1	3-oxoacyl-ACP synthase [Acinetobacter baumannii MDR-TJ]	3-oxoacyl-ACP synthase	Acinetobacter baumannii MDR-TJ	ketoacyl-synt	PF00109.22	Beta-ketoacyl_synthase_N-terminal_domain	253	gi|387124953|ref|YP_006290835.1|	-	409	8.1e-44	137.7	1.4	1	1	1.2e-43	1.8e-43	136.6	1.4	1	253	1	244	1	244	0.87
YP_006290835.1	3-oxoacyl-ACP synthase [Acinetobacter baumannii MDR-TJ]	3-oxoacyl-ACP synthase	Acinetobacter baumannii MDR-TJ	Ketoacyl-synt_C	PF02801.18	Beta-ketoacyl_synthase_C-terminal_domain	118	gi|387124953|ref|YP_006290835.1|	-	409	2.7e-35	108.8	0.7	1	1	3.2e-35	4.9e-35	107.9	0.7	1	117	252	364	252	365	0.95
YP_006291114.1	3-oxoacyl-ACP synthase [Acinetobacter baumannii MDR-TJ]	3-oxoacyl-ACP synthase	Acinetobacter baumannii MDR-TJ	ketoacyl-synt	PF00109.22	Beta-ketoacyl_synthase_N-terminal_domain	253	gi|387125232|ref|YP_006291114.1|	-	408	1e-45	143.9	2.7	1	1	1e-45	1.5e-45	143.4	2.7	1	253	1	246	1	246	0.89
YP_006291114.1	3-oxoacyl-ACP synthase [Acinetobacter baumannii MDR-TJ]	3-oxoacyl-ACP synthase	Acinetobacter baumannii MDR-TJ	Ketoacyl-synt_C	PF02801.18	Beta-ketoacyl_synthase_C-terminal_domain	118	gi|387125232|ref|YP_006291114.1|	-	408	3e-33	102.1	0	1	1	4.7e-33	7e-33	100.9	0	1	117	254	362	254	363	0.96
YP_006291117.1	3-oxoacyl-ACP synthase [Acinetobacter baumannii MDR-TJ]	3-oxoacyl-ACP synthase	Acinetobacter baumannii MDR-TJ	ketoacyl-synt	PF00109.22	Beta-ketoacyl_synthase_N-terminal_domain	253	gi|387125235|ref|YP_006291117.1|	-	400	1.3e-24	74.8	0.1	1	1	1.3e-24	2e-24	74.2	0.1	87	250	78	240	52	242	0.83
YP_006291117.1	3-oxoacyl-ACP synthase [Acinetobacter baumannii MDR-TJ]	3-oxoacyl-ACP synthase	Acinetobacter baumannii MDR-TJ	Ketoacyl-synt_C	PF02801.18	Beta-ketoacyl_synthase_C-terminal_domain	118	gi|387125235|ref|YP_006291117.1|	-	400	2.2e-31	96.1	0.6	1	1	3.5e-31	5.3e-31	94.9	0.6	4	113	246	351	244	357	0.94
YP_006291328.1	fatty oxidation complex, beta subunit FadA [Acinetobacter baumannii MDR-TJ]	fatty oxidation complex, beta subunit FadA	Acinetobacter baumannii MDR-TJ	ketoacyl-synt	PF00109.22	Beta-ketoacyl_synthase_N-terminal_domain	253	gi|387125446|ref|YP_006291328.1|	-	390	6.6e-07	16.8	0.4	1	4	0.44	1.3	-3.9	0	195	219	8	32	7	36	0.72
YP_006291328.1	fatty oxidation complex, beta subunit FadA [Acinetobacter baumannii MDR-TJ]	fatty oxidation complex, beta subunit FadA	Acinetobacter baumannii MDR-TJ	ketoacyl-synt	PF00109.22	Beta-ketoacyl_synthase_N-terminal_domain	253	gi|387125446|ref|YP_006291328.1|	-	390	6.6e-07	16.8	0.4	2	4	2.2e-07	6.6e-07	16.8	0.4	174	218	94	138	88	155	0.86
YP_006291328.1	fatty oxidation complex, beta subunit FadA [Acinetobacter baumannii MDR-TJ]	fatty oxidation complex, beta subunit FadA	Acinetobacter baumannii MDR-TJ	ketoacyl-synt	PF00109.22	Beta-ketoacyl_synthase_N-terminal_domain	253	gi|387125446|ref|YP_006291328.1|	-	390	6.6e-07	16.8	0.4	3	4	0.11	0.33	-1.9	0.2	173	251	239	258	222	284	0.64
YP_006291328.1	fatty oxidation complex, beta subunit FadA [Acinetobacter baumannii MDR-TJ]	fatty oxidation complex, beta subunit FadA	Acinetobacter baumannii MDR-TJ	ketoacyl-synt	PF00109.22	Beta-ketoacyl_synthase_N-terminal_domain	253	gi|387125446|ref|YP_006291328.1|	-	390	6.6e-07	16.8	0.4	4	4	0.11	0.34	-1.9	0	95	114	291	310	289	346	0.67
YP_006291532.1	amino acid adenylation enzyme/thioester reductase family protein [Acinetobacter baumannii MDR-TJ]	amino acid adenylation enzyme/thioester reductase family protein	Acinetobacter baumannii MDR-TJ	Condensation	PF00668.16	Condensation_domain	301	gi|387125650|ref|YP_006291532.1|	-	1319	5.9e-49	154.4	0	1	1	4.6e-49	1.4e-48	153.2	0	7	300	17	305	13	306	0.93
YP_005524069.1	3-oxoacyl-ACP synthase [Acinetobacter baumannii MDR-ZJ06]	3-oxoacyl-ACP synthase	Acinetobacter baumannii MDR-ZJ06	ketoacyl-synt	PF00109.22	Beta-ketoacyl_synthase_N-terminal_domain	253	gi|384141359|ref|YP_005524069.1|	-	409	6.6e-44	138	1.3	1	1	8e-44	1.2e-43	137.2	1.3	1	253	1	244	1	244	0.89
YP_005524069.1	3-oxoacyl-ACP synthase [Acinetobacter baumannii MDR-ZJ06]	3-oxoacyl-ACP synthase	Acinetobacter baumannii MDR-ZJ06	Ketoacyl-synt_C	PF02801.18	Beta-ketoacyl_synthase_C-terminal_domain	118	gi|384141359|ref|YP_005524069.1|	-	409	1.1e-34	106.8	0.2	1	1	1.5e-34	2.3e-34	105.8	0.2	1	117	252	364	252	365	0.95
YP_005524100.1	non-ribosomal peptide synthetase protein [Acinetobacter baumannii MDR-ZJ06]	non-ribosomal peptide synthetase protein	Acinetobacter baumannii MDR-ZJ06	Condensation	PF00668.16	Condensation_domain	301	gi|384141390|ref|YP_005524100.1|	-	1319	5.8e-49	154.4	0	1	1	3.6e-49	1.1e-48	153.5	0	7	300	17	305	13	306	0.93
YP_005524304.1	3-ketoacyl-CoA thiolase [Acinetobacter baumannii MDR-ZJ06]	3-ketoacyl-CoA thiolase	Acinetobacter baumannii MDR-ZJ06	ketoacyl-synt	PF00109.22	Beta-ketoacyl_synthase_N-terminal_domain	253	gi|384141594|ref|YP_005524304.1|	-	390	6.6e-07	16.8	0.4	1	4	0.44	1.3	-3.9	0	195	219	8	32	7	36	0.72
YP_005524304.1	3-ketoacyl-CoA thiolase [Acinetobacter baumannii MDR-ZJ06]	3-ketoacyl-CoA thiolase	Acinetobacter baumannii MDR-ZJ06	ketoacyl-synt	PF00109.22	Beta-ketoacyl_synthase_N-terminal_domain	253	gi|384141594|ref|YP_005524304.1|	-	390	6.6e-07	16.8	0.4	2	4	2.2e-07	6.6e-07	16.8	0.4	174	218	94	138	88	155	0.86
YP_005524304.1	3-ketoacyl-CoA thiolase [Acinetobacter baumannii MDR-ZJ06]	3-ketoacyl-CoA thiolase	Acinetobacter baumannii MDR-ZJ06	ketoacyl-synt	PF00109.22	Beta-ketoacyl_synthase_N-terminal_domain	253	gi|384141594|ref|YP_005524304.1|	-	390	6.6e-07	16.8	0.4	3	4	0.11	0.33	-1.9	0.2	173	251	239	258	222	284	0.64
YP_005524304.1	3-ketoacyl-CoA thiolase [Acinetobacter baumannii MDR-ZJ06]	3-ketoacyl-CoA thiolase	Acinetobacter baumannii MDR-ZJ06	ketoacyl-synt	PF00109.22	Beta-ketoacyl_synthase_N-terminal_domain	253	gi|384141594|ref|YP_005524304.1|	-	390	6.6e-07	16.8	0.4	4	4	0.11	0.34	-1.9	0	95	114	291	310	289	346	0.67
YP_005524518.1	3-oxoacyl-ACP synthase [Acinetobacter baumannii MDR-ZJ06]	3-oxoacyl-ACP synthase	Acinetobacter baumannii MDR-ZJ06	ketoacyl-synt	PF00109.22	Beta-ketoacyl_synthase_N-terminal_domain	253	gi|384141808|ref|YP_005524518.1|	-	400	1.3e-24	74.8	0.1	1	1	1.3e-24	2e-24	74.2	0.1	87	250	78	240	52	242	0.83
YP_005524518.1	3-oxoacyl-ACP synthase [Acinetobacter baumannii MDR-ZJ06]	3-oxoacyl-ACP synthase	Acinetobacter baumannii MDR-ZJ06	Ketoacyl-synt_C	PF02801.18	Beta-ketoacyl_synthase_C-terminal_domain	118	gi|384141808|ref|YP_005524518.1|	-	400	2.2e-31	96.1	0.6	1	1	3.5e-31	5.3e-31	94.9	0.6	4	113	246	351	244	357	0.94
YP_005524521.1	3-oxoacyl-ACP synthase [Acinetobacter baumannii MDR-ZJ06]	3-oxoacyl-ACP synthase	Acinetobacter baumannii MDR-ZJ06	ketoacyl-synt	PF00109.22	Beta-ketoacyl_synthase_N-terminal_domain	253	gi|384141811|ref|YP_005524521.1|	-	408	1e-45	143.9	2.7	1	1	1e-45	1.5e-45	143.4	2.7	1	253	1	246	1	246	0.89
YP_005524521.1	3-oxoacyl-ACP synthase [Acinetobacter baumannii MDR-ZJ06]	3-oxoacyl-ACP synthase	Acinetobacter baumannii MDR-ZJ06	Ketoacyl-synt_C	PF02801.18	Beta-ketoacyl_synthase_C-terminal_domain	118	gi|384141811|ref|YP_005524521.1|	-	408	3e-33	102.1	0	1	1	4.7e-33	7e-33	100.9	0	1	117	254	362	254	363	0.96
YP_005524810.1	beta-ketoacyl-ACP synthase [Acinetobacter baumannii MDR-ZJ06]	beta-ketoacyl-ACP synthase	Acinetobacter baumannii MDR-ZJ06	ketoacyl-synt	PF00109.22	Beta-ketoacyl_synthase_N-terminal_domain	253	gi|384142100|ref|YP_005524810.1|	-	409	8.1e-44	137.7	1.4	1	1	1.2e-43	1.8e-43	136.6	1.4	1	253	1	244	1	244	0.87
YP_005524810.1	beta-ketoacyl-ACP synthase [Acinetobacter baumannii MDR-ZJ06]	beta-ketoacyl-ACP synthase	Acinetobacter baumannii MDR-ZJ06	Ketoacyl-synt_C	PF02801.18	Beta-ketoacyl_synthase_C-terminal_domain	118	gi|384142100|ref|YP_005524810.1|	-	409	2.7e-35	108.8	0.7	1	1	3.2e-35	4.9e-35	107.9	0.7	1	117	252	364	252	365	0.95
YP_005525300.1	3-oxoacyl-ACP synthase [Acinetobacter baumannii MDR-ZJ06]	3-oxoacyl-ACP synthase	Acinetobacter baumannii MDR-ZJ06	ketoacyl-synt	PF00109.22	Beta-ketoacyl_synthase_N-terminal_domain	253	gi|384142590|ref|YP_005525300.1|	-	368	4.4e-09	23.9	1.6	1	2	8e-06	2.4e-05	11.7	0	61	111	71	118	2	133	0.68
YP_005525300.1	3-oxoacyl-ACP synthase [Acinetobacter baumannii MDR-ZJ06]	3-oxoacyl-ACP synthase	Acinetobacter baumannii MDR-ZJ06	ketoacyl-synt	PF00109.22	Beta-ketoacyl_synthase_N-terminal_domain	253	gi|384142590|ref|YP_005525300.1|	-	368	4.4e-09	23.9	1.6	2	2	1e-05	3.1e-05	11.3	0.6	154	199	134	179	122	184	0.86
YP_005525462.1	Acetyl-CoA acetyltransferase [Acinetobacter baumannii MDR-ZJ06]	Acetyl-CoA acetyltransferase	Acinetobacter baumannii MDR-ZJ06	ketoacyl-synt	PF00109.22	Beta-ketoacyl_synthase_N-terminal_domain	253	gi|384142752|ref|YP_005525462.1|	-	402	9.8e-12	32.6	0	1	1	6.9e-12	2.1e-11	31.6	0	167	222	82	136	78	142	0.85
YP_005525508.1	Acetyl-CoA acetyltransferase [Acinetobacter baumannii MDR-ZJ06]	Acetyl-CoA acetyltransferase	Acinetobacter baumannii MDR-ZJ06	ketoacyl-synt	PF00109.22	Beta-ketoacyl_synthase_N-terminal_domain	253	gi|384142798|ref|YP_005525508.1|	-	401	2.3e-07	18.3	0.8	1	2	1.8e-07	5.4e-07	17.1	0.2	170	222	84	135	65	143	0.77
YP_005525508.1	Acetyl-CoA acetyltransferase [Acinetobacter baumannii MDR-ZJ06]	Acetyl-CoA acetyltransferase	Acinetobacter baumannii MDR-ZJ06	ketoacyl-synt	PF00109.22	Beta-ketoacyl_synthase_N-terminal_domain	253	gi|384142798|ref|YP_005525508.1|	-	401	2.3e-07	18.3	0.8	2	2	0.31	0.92	-3.3	0	89	192	363	377	360	391	0.54
YP_005525890.1	putative acetyl-CoA acetyltransferase (acetoacetyl-CoA thiolase) [Acinetobacter baumannii MDR-ZJ06]	putative acetyl-CoA acetyltransferase (acetoacetyl-CoA thiolase)	Acinetobacter baumannii MDR-ZJ06	ketoacyl-synt	PF00109.22	Beta-ketoacyl_synthase_N-terminal_domain	253	gi|384143180|ref|YP_005525890.1|	-	390	3.7e-07	17.6	5.6	1	5	0.0022	0.0033	4.7	0	93	137	31	75	26	86	0.8
YP_005525890.1	putative acetyl-CoA acetyltransferase (acetoacetyl-CoA thiolase) [Acinetobacter baumannii MDR-ZJ06]	putative acetyl-CoA acetyltransferase (acetoacetyl-CoA thiolase)	Acinetobacter baumannii MDR-ZJ06	ketoacyl-synt	PF00109.22	Beta-ketoacyl_synthase_N-terminal_domain	253	gi|384143180|ref|YP_005525890.1|	-	390	3.7e-07	17.6	5.6	2	5	5.8e-06	8.7e-06	13.1	1.2	169	208	82	121	78	131	0.89
YP_005525890.1	putative acetyl-CoA acetyltransferase (acetoacetyl-CoA thiolase) [Acinetobacter baumannii MDR-ZJ06]	putative acetyl-CoA acetyltransferase (acetoacetyl-CoA thiolase)	Acinetobacter baumannii MDR-ZJ06	ketoacyl-synt	PF00109.22	Beta-ketoacyl_synthase_N-terminal_domain	253	gi|384143180|ref|YP_005525890.1|	-	390	3.7e-07	17.6	5.6	3	5	0.37	0.56	-2.6	0	82	101	172	191	148	217	0.65
YP_005525890.1	putative acetyl-CoA acetyltransferase (acetoacetyl-CoA thiolase) [Acinetobacter baumannii MDR-ZJ06]	putative acetyl-CoA acetyltransferase (acetoacetyl-CoA thiolase)	Acinetobacter baumannii MDR-ZJ06	ketoacyl-synt	PF00109.22	Beta-ketoacyl_synthase_N-terminal_domain	253	gi|384143180|ref|YP_005525890.1|	-	390	3.7e-07	17.6	5.6	4	5	0.17	0.25	-1.5	0	234	251	244	261	229	263	0.71
YP_005525890.1	putative acetyl-CoA acetyltransferase (acetoacetyl-CoA thiolase) [Acinetobacter baumannii MDR-ZJ06]	putative acetyl-CoA acetyltransferase (acetoacetyl-CoA thiolase)	Acinetobacter baumannii MDR-ZJ06	ketoacyl-synt	PF00109.22	Beta-ketoacyl_synthase_N-terminal_domain	253	gi|384143180|ref|YP_005525890.1|	-	390	3.7e-07	17.6	5.6	5	5	0.39	0.58	-2.7	0	96	112	295	311	292	350	0.67
YP_005525890.1	putative acetyl-CoA acetyltransferase (acetoacetyl-CoA thiolase) [Acinetobacter baumannii MDR-ZJ06]	putative acetyl-CoA acetyltransferase (acetoacetyl-CoA thiolase)	Acinetobacter baumannii MDR-ZJ06	Ketoacyl-synt_C	PF02801.18	Beta-ketoacyl_synthase_C-terminal_domain	118	gi|384143180|ref|YP_005525890.1|	-	390	6.2e-06	14	0.1	1	2	0.00038	0.00056	7.7	0	14	47	20	51	5	53	0.7
YP_005525890.1	putative acetyl-CoA acetyltransferase (acetoacetyl-CoA thiolase) [Acinetobacter baumannii MDR-ZJ06]	putative acetyl-CoA acetyltransferase (acetoacetyl-CoA thiolase)	Acinetobacter baumannii MDR-ZJ06	Ketoacyl-synt_C	PF02801.18	Beta-ketoacyl_synthase_C-terminal_domain	118	gi|384143180|ref|YP_005525890.1|	-	390	6.2e-06	14	0.1	2	2	0.015	0.022	2.6	0	27	49	292	314	269	367	0.72
YP_005526098.1	Acetyl-CoA acetyltransferase [Acinetobacter baumannii MDR-ZJ06]	Acetyl-CoA acetyltransferase	Acinetobacter baumannii MDR-ZJ06	ketoacyl-synt	PF00109.22	Beta-ketoacyl_synthase_N-terminal_domain	253	gi|384143388|ref|YP_005526098.1|	-	404	4.4e-10	27.2	0.7	1	2	4.8e-10	1.4e-09	25.5	0.2	167	208	82	123	67	142	0.84
YP_005526098.1	Acetyl-CoA acetyltransferase [Acinetobacter baumannii MDR-ZJ06]	Acetyl-CoA acetyltransferase	Acinetobacter baumannii MDR-ZJ06	ketoacyl-synt	PF00109.22	Beta-ketoacyl_synthase_N-terminal_domain	253	gi|384143388|ref|YP_005526098.1|	-	404	4.4e-10	27.2	0.7	2	2	0.046	0.14	-0.6	0	67	110	241	281	189	332	0.73
YP_005526138.1	Acetyl-CoA acetyltransferase [Acinetobacter baumannii MDR-ZJ06]	Acetyl-CoA acetyltransferase	Acinetobacter baumannii MDR-ZJ06	ketoacyl-synt	PF00109.22	Beta-ketoacyl_synthase_N-terminal_domain	253	gi|384143428|ref|YP_005526138.1|	-	403	6.1e-10	26.7	0.6	1	2	4.9e-10	1.5e-09	25.5	0.2	167	208	84	125	69	144	0.84
YP_005526138.1	Acetyl-CoA acetyltransferase [Acinetobacter baumannii MDR-ZJ06]	Acetyl-CoA acetyltransferase	Acinetobacter baumannii MDR-ZJ06	ketoacyl-synt	PF00109.22	Beta-ketoacyl_synthase_N-terminal_domain	253	gi|384143428|ref|YP_005526138.1|	-	403	6.1e-10	26.7	0.6	2	2	0.14	0.41	-2.2	0	80	107	256	280	208	324	0.65
YP_005526363.1	Acetyl-CoA acetyltransferase [Acinetobacter baumannii MDR-ZJ06]	Acetyl-CoA acetyltransferase	Acinetobacter baumannii MDR-ZJ06	ketoacyl-synt	PF00109.22	Beta-ketoacyl_synthase_N-terminal_domain	253	gi|384143653|ref|YP_005526363.1|	-	522	2.6e-07	18.1	0.1	1	1	2.4e-07	7.3e-07	16.7	0.1	166	206	177	217	168	231	0.82
YP_005526729.1	BasD [Acinetobacter baumannii MDR-ZJ06]	BasD	Acinetobacter baumannii MDR-ZJ06	Condensation	PF00668.16	Condensation_domain	301	gi|384144019|ref|YP_005526729.1|	-	980	4.3e-55	174.5	14.5	1	2	1.5e-36	4.4e-36	112.1	1.2	4	301	26	321	23	321	0.9
YP_005526729.1	BasD [Acinetobacter baumannii MDR-ZJ06]	BasD	Acinetobacter baumannii MDR-ZJ06	Condensation	PF00668.16	Condensation_domain	301	gi|384144019|ref|YP_005526729.1|	-	980	4.3e-55	174.5	14.5	2	2	6.7e-23	2e-22	67.2	6.2	6	272	472	726	468	728	0.9
YP_005526737.1	non-ribosomal peptide synthetase module [Acinetobacter baumannii MDR-ZJ06]	non-ribosomal peptide synthetase module	Acinetobacter baumannii MDR-ZJ06	Condensation	PF00668.16	Condensation_domain	301	gi|384144027|ref|YP_005526737.1|	-	698	2.3e-47	149.2	13.7	1	2	7e-05	0.00021	8.1	3.2	14	160	21	160	12	213	0.78
YP_005526737.1	non-ribosomal peptide synthetase module [Acinetobacter baumannii MDR-ZJ06]	non-ribosomal peptide synthetase module	Acinetobacter baumannii MDR-ZJ06	Condensation	PF00668.16	Condensation_domain	301	gi|384144027|ref|YP_005526737.1|	-	698	2.3e-47	149.2	13.7	2	2	4.6e-47	1.4e-46	146.6	2.9	3	299	275	567	273	569	0.9
YP_005527165.1	bifunctional protein wax ester synthase/acyl-CoA diacylglycerol acyltransferase [Acinetobacter baumannii MDR-ZJ06]	bifunctional protein wax ester synthase/acyl-CoA diacylglycerol acyltransferase	Acinetobacter baumannii MDR-ZJ06	Condensation	PF00668.16	Condensation_domain	301	gi|384144455|ref|YP_005527165.1|	-	461	1e-09	25.5	0.2	1	2	5.8e-07	1.7e-06	14.9	0.1	82	154	79	151	67	175	0.72
YP_005527165.1	bifunctional protein wax ester synthase/acyl-CoA diacylglycerol acyltransferase [Acinetobacter baumannii MDR-ZJ06]	bifunctional protein wax ester synthase/acyl-CoA diacylglycerol acyltransferase	Acinetobacter baumannii MDR-ZJ06	Condensation	PF00668.16	Condensation_domain	301	gi|384144455|ref|YP_005527165.1|	-	461	1e-09	25.5	0.2	2	2	5.3e-05	0.00016	8.5	0	224	261	237	274	205	309	0.8
YP_005527231.1	putative acetyl-CoA acetyltransferase (acetoacetyl-CoA thiolase) [Acinetobacter baumannii MDR-ZJ06]	putative acetyl-CoA acetyltransferase (acetoacetyl-CoA thiolase)	Acinetobacter baumannii MDR-ZJ06	ketoacyl-synt	PF00109.22	Beta-ketoacyl_synthase_N-terminal_domain	253	gi|384144521|ref|YP_005527231.1|	-	391	3.3e-08	21	6.9	1	4	0.00096	0.0029	4.9	0	91	127	29	65	26	85	0.77
YP_005527231.1	putative acetyl-CoA acetyltransferase (acetoacetyl-CoA thiolase) [Acinetobacter baumannii MDR-ZJ06]	putative acetyl-CoA acetyltransferase (acetoacetyl-CoA thiolase)	Acinetobacter baumannii MDR-ZJ06	ketoacyl-synt	PF00109.22	Beta-ketoacyl_synthase_N-terminal_domain	253	gi|384144521|ref|YP_005527231.1|	-	391	3.3e-08	21	6.9	2	4	7e-08	2.1e-07	18.4	1.3	169	208	82	121	76	136	0.87
YP_005527231.1	putative acetyl-CoA acetyltransferase (acetoacetyl-CoA thiolase) [Acinetobacter baumannii MDR-ZJ06]	putative acetyl-CoA acetyltransferase (acetoacetyl-CoA thiolase)	Acinetobacter baumannii MDR-ZJ06	ketoacyl-synt	PF00109.22	Beta-ketoacyl_synthase_N-terminal_domain	253	gi|384144521|ref|YP_005527231.1|	-	391	3.3e-08	21	6.9	3	4	0.25	0.74	-3	0	113	136	151	174	145	198	0.56
YP_005527231.1	putative acetyl-CoA acetyltransferase (acetoacetyl-CoA thiolase) [Acinetobacter baumannii MDR-ZJ06]	putative acetyl-CoA acetyltransferase (acetoacetyl-CoA thiolase)	Acinetobacter baumannii MDR-ZJ06	ketoacyl-synt	PF00109.22	Beta-ketoacyl_synthase_N-terminal_domain	253	gi|384144521|ref|YP_005527231.1|	-	391	3.3e-08	21	6.9	4	4	0.22	0.66	-2.8	0.1	233	251	243	261	233	263	0.67
YP_005527241.1	Acetyl-CoA acetyltransferase [Acinetobacter baumannii MDR-ZJ06]	Acetyl-CoA acetyltransferase	Acinetobacter baumannii MDR-ZJ06	ketoacyl-synt	PF00109.22	Beta-ketoacyl_synthase_N-terminal_domain	253	gi|384144531|ref|YP_005527241.1|	-	401	4.3e-10	27.3	0.1	1	2	1.2e-09	3.7e-09	24.2	0	175	206	91	122	73	145	0.92
YP_005527241.1	Acetyl-CoA acetyltransferase [Acinetobacter baumannii MDR-ZJ06]	Acetyl-CoA acetyltransferase	Acinetobacter baumannii MDR-ZJ06	ketoacyl-synt	PF00109.22	Beta-ketoacyl_synthase_N-terminal_domain	253	gi|384144531|ref|YP_005527241.1|	-	401	4.3e-10	27.3	0.1	2	2	0.028	0.085	0.1	0	95	114	304	323	292	364	0.81
YP_001706219.1	acetyl-CoA acetyltransferase [Acinetobacter baumannii SDF]	acetyl-CoA acetyltransferase	Acinetobacter baumannii SDF	ketoacyl-synt	PF00109.22	Beta-ketoacyl_synthase_N-terminal_domain	253	gi|169632483|ref|YP_001706219.1|	-	401	4.2e-10	27.3	0.1	1	2	1.2e-09	3.7e-09	24.2	0	175	206	91	122	73	145	0.92
YP_001706219.1	acetyl-CoA acetyltransferase [Acinetobacter baumannii SDF]	acetyl-CoA acetyltransferase	Acinetobacter baumannii SDF	ketoacyl-synt	PF00109.22	Beta-ketoacyl_synthase_N-terminal_domain	253	gi|169632483|ref|YP_001706219.1|	-	401	4.2e-10	27.3	0.1	2	2	0.028	0.085	0.1	0	95	114	304	323	292	364	0.81
YP_001706229.1	acetyl-CoA acetyltransferase (acetoacetyl-CoA thiolase) [Acinetobacter baumannii SDF]	acetyl-CoA acetyltransferase (acetoacetyl-CoA thiolase)	Acinetobacter baumannii SDF	ketoacyl-synt	PF00109.22	Beta-ketoacyl_synthase_N-terminal_domain	253	gi|169632493|ref|YP_001706229.1|	-	392	2.9e-08	21.2	7	1	4	0.00089	0.0027	5	0	91	128	29	66	26	87	0.77
YP_001706229.1	acetyl-CoA acetyltransferase (acetoacetyl-CoA thiolase) [Acinetobacter baumannii SDF]	acetyl-CoA acetyltransferase (acetoacetyl-CoA thiolase)	Acinetobacter baumannii SDF	ketoacyl-synt	PF00109.22	Beta-ketoacyl_synthase_N-terminal_domain	253	gi|169632493|ref|YP_001706229.1|	-	392	2.9e-08	21.2	7	2	4	8.1e-08	2.4e-07	18.2	1.6	169	208	82	121	77	140	0.87
YP_001706229.1	acetyl-CoA acetyltransferase (acetoacetyl-CoA thiolase) [Acinetobacter baumannii SDF]	acetyl-CoA acetyltransferase (acetoacetyl-CoA thiolase)	Acinetobacter baumannii SDF	ketoacyl-synt	PF00109.22	Beta-ketoacyl_synthase_N-terminal_domain	253	gi|169632493|ref|YP_001706229.1|	-	392	2.9e-08	21.2	7	3	4	0.13	0.4	-2.1	0	82	100	172	190	146	206	0.6
YP_001706229.1	acetyl-CoA acetyltransferase (acetoacetyl-CoA thiolase) [Acinetobacter baumannii SDF]	acetyl-CoA acetyltransferase (acetoacetyl-CoA thiolase)	Acinetobacter baumannii SDF	ketoacyl-synt	PF00109.22	Beta-ketoacyl_synthase_N-terminal_domain	253	gi|169632493|ref|YP_001706229.1|	-	392	2.9e-08	21.2	7	4	4	0.22	0.66	-2.9	0.1	233	251	243	261	233	263	0.67
YP_001706290.1	bifunctional wax ester synthase / acyl-CoA:diacylglycerol acyltransferase [Acinetobacter baumannii SDF]	bifunctional wax ester synthase / acyl-CoA:diacylglycerol acyltransferase	Acinetobacter baumannii SDF	Condensation	PF00668.16	Condensation_domain	301	gi|169632554|ref|YP_001706290.1|	-	461	9.8e-10	25.6	0.2	1	2	5.8e-07	1.7e-06	14.9	0.1	82	154	79	151	67	175	0.72
YP_001706290.1	bifunctional wax ester synthase / acyl-CoA:diacylglycerol acyltransferase [Acinetobacter baumannii SDF]	bifunctional wax ester synthase / acyl-CoA:diacylglycerol acyltransferase	Acinetobacter baumannii SDF	Condensation	PF00668.16	Condensation_domain	301	gi|169632554|ref|YP_001706290.1|	-	461	9.8e-10	25.6	0.2	2	2	4.9e-05	0.00015	8.6	0	224	261	237	274	205	310	0.79
YP_001706919.1	3-oxoacyl-ACP synthase [Acinetobacter baumannii SDF]	3-oxoacyl-ACP synthase	Acinetobacter baumannii SDF	ketoacyl-synt	PF00109.22	Beta-ketoacyl_synthase_N-terminal_domain	253	gi|169633183|ref|YP_001706919.1|	-	368	4.4e-09	23.9	1.6	1	2	8e-06	2.4e-05	11.7	0	61	111	71	118	2	133	0.68
YP_001706919.1	3-oxoacyl-ACP synthase [Acinetobacter baumannii SDF]	3-oxoacyl-ACP synthase	Acinetobacter baumannii SDF	ketoacyl-synt	PF00109.22	Beta-ketoacyl_synthase_N-terminal_domain	253	gi|169633183|ref|YP_001706919.1|	-	368	4.4e-09	23.9	1.6	2	2	1e-05	3.1e-05	11.3	0.6	154	199	134	179	122	184	0.86
YP_001707333.1	beta-ketoadipyl CoA thiolase [Acinetobacter baumannii SDF]	beta-ketoadipyl CoA thiolase	Acinetobacter baumannii SDF	ketoacyl-synt	PF00109.22	Beta-ketoacyl_synthase_N-terminal_domain	253	gi|169633597|ref|YP_001707333.1|	-	406	6.6e-10	26.6	0.6	1	2	5e-10	1.5e-09	25.5	0.2	167	208	84	125	69	144	0.84
YP_001707333.1	beta-ketoadipyl CoA thiolase [Acinetobacter baumannii SDF]	beta-ketoadipyl CoA thiolase	Acinetobacter baumannii SDF	ketoacyl-synt	PF00109.22	Beta-ketoacyl_synthase_N-terminal_domain	253	gi|169633597|ref|YP_001707333.1|	-	406	6.6e-10	26.6	0.6	2	2	0.15	0.46	-2.3	0	84	107	257	280	213	331	0.67
YP_001707349.1	beta-ketoadipyl CoA thiolase [Acinetobacter baumannii SDF]	beta-ketoadipyl CoA thiolase	Acinetobacter baumannii SDF	ketoacyl-synt	PF00109.22	Beta-ketoacyl_synthase_N-terminal_domain	253	gi|169633613|ref|YP_001707349.1|	-	403	6.6e-10	26.6	0.6	1	2	4.9e-10	1.5e-09	25.5	0.2	167	208	84	125	69	144	0.84
YP_001707349.1	beta-ketoadipyl CoA thiolase [Acinetobacter baumannii SDF]	beta-ketoadipyl CoA thiolase	Acinetobacter baumannii SDF	ketoacyl-synt	PF00109.22	Beta-ketoacyl_synthase_N-terminal_domain	253	gi|169633613|ref|YP_001707349.1|	-	403	6.6e-10	26.6	0.6	2	2	0.15	0.44	-2.3	0	84	107	257	280	212	332	0.67
YP_001707502.1	acetyl-CoA acetyltransferase [Acinetobacter baumannii SDF]	acetyl-CoA acetyltransferase	Acinetobacter baumannii SDF	ketoacyl-synt	PF00109.22	Beta-ketoacyl_synthase_N-terminal_domain	253	gi|169633766|ref|YP_001707502.1|	-	429	2.2e-07	18.4	0.1	1	1	1.9e-07	5.6e-07	17	0.1	166	206	84	124	75	138	0.82
YP_001707797.1	beta-ketoacyl-ACP synthase [Acinetobacter baumannii SDF]	beta-ketoacyl-ACP synthase	Acinetobacter baumannii SDF	ketoacyl-synt	PF00109.22	Beta-ketoacyl_synthase_N-terminal_domain	253	gi|169634061|ref|YP_001707797.1|	-	409	8.1e-44	137.7	1.4	1	1	1.2e-43	1.8e-43	136.6	1.4	1	253	1	244	1	244	0.87
YP_001707797.1	beta-ketoacyl-ACP synthase [Acinetobacter baumannii SDF]	beta-ketoacyl-ACP synthase	Acinetobacter baumannii SDF	Ketoacyl-synt_C	PF02801.18	Beta-ketoacyl_synthase_C-terminal_domain	118	gi|169634061|ref|YP_001707797.1|	-	409	2.7e-35	108.8	0.7	1	1	3.2e-35	4.9e-35	107.9	0.7	1	117	252	364	252	365	0.95
YP_001708315.1	3-ketoacyl-CoA thiolase [Acinetobacter baumannii SDF]	3-ketoacyl-CoA thiolase	Acinetobacter baumannii SDF	ketoacyl-synt	PF00109.22	Beta-ketoacyl_synthase_N-terminal_domain	253	gi|169634579|ref|YP_001708315.1|	-	390	6.6e-07	16.8	0.4	1	4	0.44	1.3	-3.9	0	195	219	8	32	7	36	0.72
YP_001708315.1	3-ketoacyl-CoA thiolase [Acinetobacter baumannii SDF]	3-ketoacyl-CoA thiolase	Acinetobacter baumannii SDF	ketoacyl-synt	PF00109.22	Beta-ketoacyl_synthase_N-terminal_domain	253	gi|169634579|ref|YP_001708315.1|	-	390	6.6e-07	16.8	0.4	2	4	2.2e-07	6.6e-07	16.8	0.4	174	218	94	138	88	155	0.86
YP_001708315.1	3-ketoacyl-CoA thiolase [Acinetobacter baumannii SDF]	3-ketoacyl-CoA thiolase	Acinetobacter baumannii SDF	ketoacyl-synt	PF00109.22	Beta-ketoacyl_synthase_N-terminal_domain	253	gi|169634579|ref|YP_001708315.1|	-	390	6.6e-07	16.8	0.4	3	4	0.11	0.33	-1.9	0.2	173	251	239	258	222	284	0.64
YP_001708315.1	3-ketoacyl-CoA thiolase [Acinetobacter baumannii SDF]	3-ketoacyl-CoA thiolase	Acinetobacter baumannii SDF	ketoacyl-synt	PF00109.22	Beta-ketoacyl_synthase_N-terminal_domain	253	gi|169634579|ref|YP_001708315.1|	-	390	6.6e-07	16.8	0.4	4	4	0.11	0.34	-1.9	0	95	114	291	310	289	346	0.67
YP_005797002.1	3-oxoacyl-ACP synthase [Acinetobacter baumannii TCDC-AB0715]	3-oxoacyl-ACP synthase	Acinetobacter baumannii TCDC-AB0715	ketoacyl-synt	PF00109.22	Beta-ketoacyl_synthase_N-terminal_domain	253	gi|385235663|ref|YP_005797002.1|	-	409	6.9e-44	138	1.7	1	1	8.1e-44	1.2e-43	137.2	1.7	1	253	1	244	1	244	0.89
YP_005797002.1	3-oxoacyl-ACP synthase [Acinetobacter baumannii TCDC-AB0715]	3-oxoacyl-ACP synthase	Acinetobacter baumannii TCDC-AB0715	Ketoacyl-synt_C	PF02801.18	Beta-ketoacyl_synthase_C-terminal_domain	118	gi|385235663|ref|YP_005797002.1|	-	409	1.1e-34	106.8	0.2	1	1	1.5e-34	2.3e-34	105.8	0.2	1	117	252	364	252	365	0.95
YP_005797030.1	non-ribosomal peptide synthetase protein [Acinetobacter baumannii TCDC-AB0715]	non-ribosomal peptide synthetase protein	Acinetobacter baumannii TCDC-AB0715	Condensation	PF00668.16	Condensation_domain	301	gi|385235691|ref|YP_005797030.1|	-	1319	5.1e-49	154.6	0	1	1	3.6e-49	1.1e-48	153.5	0	7	300	17	305	13	306	0.93
YP_005797247.1	3-ketoacyl-CoA thiolase [Acinetobacter baumannii TCDC-AB0715]	3-ketoacyl-CoA thiolase	Acinetobacter baumannii TCDC-AB0715	ketoacyl-synt	PF00109.22	Beta-ketoacyl_synthase_N-terminal_domain	253	gi|385235908|ref|YP_005797247.1|	-	390	6.6e-07	16.8	0.4	1	4	0.44	1.3	-3.9	0	195	219	8	32	7	36	0.72
YP_005797247.1	3-ketoacyl-CoA thiolase [Acinetobacter baumannii TCDC-AB0715]	3-ketoacyl-CoA thiolase	Acinetobacter baumannii TCDC-AB0715	ketoacyl-synt	PF00109.22	Beta-ketoacyl_synthase_N-terminal_domain	253	gi|385235908|ref|YP_005797247.1|	-	390	6.6e-07	16.8	0.4	2	4	2.2e-07	6.6e-07	16.8	0.4	174	218	94	138	88	155	0.86
YP_005797247.1	3-ketoacyl-CoA thiolase [Acinetobacter baumannii TCDC-AB0715]	3-ketoacyl-CoA thiolase	Acinetobacter baumannii TCDC-AB0715	ketoacyl-synt	PF00109.22	Beta-ketoacyl_synthase_N-terminal_domain	253	gi|385235908|ref|YP_005797247.1|	-	390	6.6e-07	16.8	0.4	3	4	0.11	0.33	-1.9	0.2	173	251	239	258	222	284	0.64
YP_005797247.1	3-ketoacyl-CoA thiolase [Acinetobacter baumannii TCDC-AB0715]	3-ketoacyl-CoA thiolase	Acinetobacter baumannii TCDC-AB0715	ketoacyl-synt	PF00109.22	Beta-ketoacyl_synthase_N-terminal_domain	253	gi|385235908|ref|YP_005797247.1|	-	390	6.6e-07	16.8	0.4	4	4	0.11	0.34	-1.9	0	95	114	291	310	289	346	0.67
YP_005797458.1	3-oxoacyl-ACP synthase [Acinetobacter baumannii TCDC-AB0715]	3-oxoacyl-ACP synthase	Acinetobacter baumannii TCDC-AB0715	ketoacyl-synt	PF00109.22	Beta-ketoacyl_synthase_N-terminal_domain	253	gi|385236119|ref|YP_005797458.1|	-	400	1.3e-24	74.8	0.1	1	1	1.3e-24	2e-24	74.2	0.1	87	250	78	240	52	242	0.83
YP_005797458.1	3-oxoacyl-ACP synthase [Acinetobacter baumannii TCDC-AB0715]	3-oxoacyl-ACP synthase	Acinetobacter baumannii TCDC-AB0715	Ketoacyl-synt_C	PF02801.18	Beta-ketoacyl_synthase_C-terminal_domain	118	gi|385236119|ref|YP_005797458.1|	-	400	2.2e-31	96.1	0.6	1	1	3.5e-31	5.3e-31	94.9	0.6	4	113	246	351	244	357	0.94
YP_005797461.1	3-oxoacyl-(acyl carrier protein) synthase II [Acinetobacter baumannii TCDC-AB0715]	3-oxoacyl-(acyl carrier protein) synthase II	Acinetobacter baumannii TCDC-AB0715	ketoacyl-synt	PF00109.22	Beta-ketoacyl_synthase_N-terminal_domain	253	gi|385236122|ref|YP_005797461.1|	-	408	1e-45	143.9	2.7	1	1	1e-45	1.5e-45	143.4	2.7	1	253	1	246	1	246	0.89
YP_005797461.1	3-oxoacyl-(acyl carrier protein) synthase II [Acinetobacter baumannii TCDC-AB0715]	3-oxoacyl-(acyl carrier protein) synthase II	Acinetobacter baumannii TCDC-AB0715	Ketoacyl-synt_C	PF02801.18	Beta-ketoacyl_synthase_C-terminal_domain	118	gi|385236122|ref|YP_005797461.1|	-	408	3e-33	102.1	0	1	1	4.7e-33	7e-33	100.9	0	1	117	254	362	254	363	0.96
YP_005797740.1	3-oxoacyl-ACP synthase [Acinetobacter baumannii TCDC-AB0715]	3-oxoacyl-ACP synthase	Acinetobacter baumannii TCDC-AB0715	ketoacyl-synt	PF00109.22	Beta-ketoacyl_synthase_N-terminal_domain	253	gi|385236401|ref|YP_005797740.1|	-	409	8.1e-44	137.7	1.4	1	1	1.2e-43	1.8e-43	136.6	1.4	1	253	1	244	1	244	0.87
YP_005797740.1	3-oxoacyl-ACP synthase [Acinetobacter baumannii TCDC-AB0715]	3-oxoacyl-ACP synthase	Acinetobacter baumannii TCDC-AB0715	Ketoacyl-synt_C	PF02801.18	Beta-ketoacyl_synthase_C-terminal_domain	118	gi|385236401|ref|YP_005797740.1|	-	409	2.7e-35	108.8	0.7	1	1	3.2e-35	4.9e-35	107.9	0.7	1	117	252	364	252	365	0.95
YP_005798262.1	3-oxoacyl-ACP synthase [Acinetobacter baumannii TCDC-AB0715]	3-oxoacyl-ACP synthase	Acinetobacter baumannii TCDC-AB0715	ketoacyl-synt	PF00109.22	Beta-ketoacyl_synthase_N-terminal_domain	253	gi|385236923|ref|YP_005798262.1|	-	368	4.4e-09	23.9	1.6	1	2	8e-06	2.4e-05	11.7	0	61	111	71	118	2	133	0.68
YP_005798262.1	3-oxoacyl-ACP synthase [Acinetobacter baumannii TCDC-AB0715]	3-oxoacyl-ACP synthase	Acinetobacter baumannii TCDC-AB0715	ketoacyl-synt	PF00109.22	Beta-ketoacyl_synthase_N-terminal_domain	253	gi|385236923|ref|YP_005798262.1|	-	368	4.4e-09	23.9	1.6	2	2	1e-05	3.1e-05	11.3	0.6	154	199	134	179	122	184	0.86
YP_005798405.1	acetyl-CoA acetyltransferase [Acinetobacter baumannii TCDC-AB0715]	acetyl-CoA acetyltransferase	Acinetobacter baumannii TCDC-AB0715	ketoacyl-synt	PF00109.22	Beta-ketoacyl_synthase_N-terminal_domain	253	gi|385237066|ref|YP_005798405.1|	-	402	9.8e-12	32.6	0	1	1	6.9e-12	2.1e-11	31.6	0	167	222	82	136	78	142	0.85
YP_005798447.1	acetyl-CoA acetyltransferase [Acinetobacter baumannii TCDC-AB0715]	acetyl-CoA acetyltransferase	Acinetobacter baumannii TCDC-AB0715	ketoacyl-synt	PF00109.22	Beta-ketoacyl_synthase_N-terminal_domain	253	gi|385237108|ref|YP_005798447.1|	-	401	2.3e-07	18.3	0.8	1	2	1.8e-07	5.4e-07	17.1	0.2	170	222	84	135	65	143	0.77
YP_005798447.1	acetyl-CoA acetyltransferase [Acinetobacter baumannii TCDC-AB0715]	acetyl-CoA acetyltransferase	Acinetobacter baumannii TCDC-AB0715	ketoacyl-synt	PF00109.22	Beta-ketoacyl_synthase_N-terminal_domain	253	gi|385237108|ref|YP_005798447.1|	-	401	2.3e-07	18.3	0.8	2	2	0.31	0.92	-3.3	0	89	192	363	377	360	391	0.54
YP_005798867.1	acetyl-CoA acetyltransferase [Acinetobacter baumannii TCDC-AB0715]	acetyl-CoA acetyltransferase	Acinetobacter baumannii TCDC-AB0715	ketoacyl-synt	PF00109.22	Beta-ketoacyl_synthase_N-terminal_domain	253	gi|385237528|ref|YP_005798867.1|	-	390	3.7e-07	17.6	5.6	1	5	0.0022	0.0033	4.7	0	93	137	31	75	26	86	0.8
YP_005798867.1	acetyl-CoA acetyltransferase [Acinetobacter baumannii TCDC-AB0715]	acetyl-CoA acetyltransferase	Acinetobacter baumannii TCDC-AB0715	ketoacyl-synt	PF00109.22	Beta-ketoacyl_synthase_N-terminal_domain	253	gi|385237528|ref|YP_005798867.1|	-	390	3.7e-07	17.6	5.6	2	5	5.8e-06	8.7e-06	13.1	1.2	169	208	82	121	78	131	0.89
YP_005798867.1	acetyl-CoA acetyltransferase [Acinetobacter baumannii TCDC-AB0715]	acetyl-CoA acetyltransferase	Acinetobacter baumannii TCDC-AB0715	ketoacyl-synt	PF00109.22	Beta-ketoacyl_synthase_N-terminal_domain	253	gi|385237528|ref|YP_005798867.1|	-	390	3.7e-07	17.6	5.6	3	5	0.37	0.56	-2.6	0	82	101	172	191	148	217	0.65
YP_005798867.1	acetyl-CoA acetyltransferase [Acinetobacter baumannii TCDC-AB0715]	acetyl-CoA acetyltransferase	Acinetobacter baumannii TCDC-AB0715	ketoacyl-synt	PF00109.22	Beta-ketoacyl_synthase_N-terminal_domain	253	gi|385237528|ref|YP_005798867.1|	-	390	3.7e-07	17.6	5.6	4	5	0.17	0.25	-1.5	0	234	251	244	261	229	263	0.71
YP_005798867.1	acetyl-CoA acetyltransferase [Acinetobacter baumannii TCDC-AB0715]	acetyl-CoA acetyltransferase	Acinetobacter baumannii TCDC-AB0715	ketoacyl-synt	PF00109.22	Beta-ketoacyl_synthase_N-terminal_domain	253	gi|385237528|ref|YP_005798867.1|	-	390	3.7e-07	17.6	5.6	5	5	0.39	0.58	-2.7	0	96	112	295	311	292	350	0.67
YP_005798867.1	acetyl-CoA acetyltransferase [Acinetobacter baumannii TCDC-AB0715]	acetyl-CoA acetyltransferase	Acinetobacter baumannii TCDC-AB0715	Ketoacyl-synt_C	PF02801.18	Beta-ketoacyl_synthase_C-terminal_domain	118	gi|385237528|ref|YP_005798867.1|	-	390	6.2e-06	14	0.1	1	2	0.00038	0.00056	7.7	0	14	47	20	51	5	53	0.7
YP_005798867.1	acetyl-CoA acetyltransferase [Acinetobacter baumannii TCDC-AB0715]	acetyl-CoA acetyltransferase	Acinetobacter baumannii TCDC-AB0715	Ketoacyl-synt_C	PF02801.18	Beta-ketoacyl_synthase_C-terminal_domain	118	gi|385237528|ref|YP_005798867.1|	-	390	6.2e-06	14	0.1	2	2	0.015	0.022	2.6	0	27	49	292	314	269	367	0.72
YP_005799056.1	beta-ketoadipyl CoA thiolase [Acinetobacter baumannii TCDC-AB0715]	beta-ketoadipyl CoA thiolase	Acinetobacter baumannii TCDC-AB0715	ketoacyl-synt	PF00109.22	Beta-ketoacyl_synthase_N-terminal_domain	253	gi|385237717|ref|YP_005799056.1|	-	171	2.3e-10	28.1	0.1	1	1	1e-10	3e-10	27.7	0.1	167	208	82	123	63	142	0.84
YP_005799336.1	acetyl-CoA acetyltransferase [Acinetobacter baumannii TCDC-AB0715]	acetyl-CoA acetyltransferase	Acinetobacter baumannii TCDC-AB0715	ketoacyl-synt	PF00109.22	Beta-ketoacyl_synthase_N-terminal_domain	253	gi|385237997|ref|YP_005799336.1|	-	522	2.6e-07	18.1	0.1	1	1	2.4e-07	7.3e-07	16.7	0.1	166	206	177	217	168	231	0.82
YP_005799710.1	acinetobactin biosynthesis protein [Acinetobacter baumannii TCDC-AB0715]	acinetobactin biosynthesis protein	Acinetobacter baumannii TCDC-AB0715	Condensation	PF00668.16	Condensation_domain	301	gi|385238371|ref|YP_005799710.1|	-	949	3.4e-53	168.3	14.2	1	2	1.4e-34	4.1e-34	105.6	1	15	301	6	290	1	290	0.88
YP_005799710.1	acinetobactin biosynthesis protein [Acinetobacter baumannii TCDC-AB0715]	acinetobactin biosynthesis protein	Acinetobacter baumannii TCDC-AB0715	Condensation	PF00668.16	Condensation_domain	301	gi|385238371|ref|YP_005799710.1|	-	949	3.4e-53	168.3	14.2	2	2	6.4e-23	1.9e-22	67.3	6.2	6	272	441	695	437	697	0.9
YP_005799717.1	non-ribosomal peptide synthetase module [Acinetobacter baumannii TCDC-AB0715]	non-ribosomal peptide synthetase module	Acinetobacter baumannii TCDC-AB0715	Condensation	PF00668.16	Condensation_domain	301	gi|385238378|ref|YP_005799717.1|	-	676	1.6e-47	149.7	11.6	1	2	7.2e-05	0.00022	8	1.5	34	160	18	138	5	191	0.82
YP_005799717.1	non-ribosomal peptide synthetase module [Acinetobacter baumannii TCDC-AB0715]	non-ribosomal peptide synthetase module	Acinetobacter baumannii TCDC-AB0715	Condensation	PF00668.16	Condensation_domain	301	gi|385238378|ref|YP_005799717.1|	-	676	1.6e-47	149.7	11.6	2	2	4.2e-47	1.3e-46	146.7	2.9	3	299	253	545	251	547	0.9
YP_005800124.1	bifunctional protein wax ester synthase/acyl-CoA diacylglycerol acyltransferase [Acinetobacter baumannii TCDC-AB0715]	bifunctional protein wax ester synthase/acyl-CoA diacylglycerol acyltransferase	Acinetobacter baumannii TCDC-AB0715	Condensation	PF00668.16	Condensation_domain	301	gi|385238785|ref|YP_005800124.1|	-	461	1e-09	25.5	0.2	1	2	5.8e-07	1.7e-06	14.9	0.1	82	154	79	151	67	175	0.72
YP_005800124.1	bifunctional protein wax ester synthase/acyl-CoA diacylglycerol acyltransferase [Acinetobacter baumannii TCDC-AB0715]	bifunctional protein wax ester synthase/acyl-CoA diacylglycerol acyltransferase	Acinetobacter baumannii TCDC-AB0715	Condensation	PF00668.16	Condensation_domain	301	gi|385238785|ref|YP_005800124.1|	-	461	1e-09	25.5	0.2	2	2	5.3e-05	0.00016	8.5	0	224	261	237	274	205	309	0.8
YP_005800188.1	acetyl-CoA acetyltransferase [Acinetobacter baumannii TCDC-AB0715]	acetyl-CoA acetyltransferase	Acinetobacter baumannii TCDC-AB0715	ketoacyl-synt	PF00109.22	Beta-ketoacyl_synthase_N-terminal_domain	253	gi|385238849|ref|YP_005800188.1|	-	391	3.3e-08	21	6.9	1	4	0.00096	0.0029	4.9	0	91	127	29	65	26	85	0.77
YP_005800188.1	acetyl-CoA acetyltransferase [Acinetobacter baumannii TCDC-AB0715]	acetyl-CoA acetyltransferase	Acinetobacter baumannii TCDC-AB0715	ketoacyl-synt	PF00109.22	Beta-ketoacyl_synthase_N-terminal_domain	253	gi|385238849|ref|YP_005800188.1|	-	391	3.3e-08	21	6.9	2	4	7e-08	2.1e-07	18.4	1.3	169	208	82	121	76	136	0.87
YP_005800188.1	acetyl-CoA acetyltransferase [Acinetobacter baumannii TCDC-AB0715]	acetyl-CoA acetyltransferase	Acinetobacter baumannii TCDC-AB0715	ketoacyl-synt	PF00109.22	Beta-ketoacyl_synthase_N-terminal_domain	253	gi|385238849|ref|YP_005800188.1|	-	391	3.3e-08	21	6.9	3	4	0.25	0.74	-3	0	113	136	151	174	145	198	0.56
YP_005800188.1	acetyl-CoA acetyltransferase [Acinetobacter baumannii TCDC-AB0715]	acetyl-CoA acetyltransferase	Acinetobacter baumannii TCDC-AB0715	ketoacyl-synt	PF00109.22	Beta-ketoacyl_synthase_N-terminal_domain	253	gi|385238849|ref|YP_005800188.1|	-	391	3.3e-08	21	6.9	4	4	0.22	0.66	-2.8	0.1	233	251	243	261	233	263	0.67
YP_005800197.1	acetyl-CoA acetyltransferase [Acinetobacter baumannii TCDC-AB0715]	acetyl-CoA acetyltransferase	Acinetobacter baumannii TCDC-AB0715	ketoacyl-synt	PF00109.22	Beta-ketoacyl_synthase_N-terminal_domain	253	gi|385238858|ref|YP_005800197.1|	-	401	4.3e-10	27.3	0.1	1	2	1.2e-09	3.7e-09	24.2	0	175	206	91	122	73	145	0.92
YP_005800197.1	acetyl-CoA acetyltransferase [Acinetobacter baumannii TCDC-AB0715]	acetyl-CoA acetyltransferase	Acinetobacter baumannii TCDC-AB0715	ketoacyl-synt	PF00109.22	Beta-ketoacyl_synthase_N-terminal_domain	253	gi|385238858|ref|YP_005800197.1|	-	401	4.3e-10	27.3	0.1	2	2	0.028	0.085	0.1	0	95	114	304	323	292	364	0.81
YP_006846645.1	hypothetical protein M3Q_318 [Acinetobacter baumannii TYTH-1]	hypothetical protein M3Q_318	Acinetobacter baumannii TYTH-1	ketoacyl-synt	PF00109.22	Beta-ketoacyl_synthase_N-terminal_domain	253	gi|407931002|ref|YP_006846645.1|	-	409	6.6e-44	138	1.3	1	1	8e-44	1.2e-43	137.2	1.3	1	253	1	244	1	244	0.89
YP_006846645.1	hypothetical protein M3Q_318 [Acinetobacter baumannii TYTH-1]	hypothetical protein M3Q_318	Acinetobacter baumannii TYTH-1	Ketoacyl-synt_C	PF02801.18	Beta-ketoacyl_synthase_C-terminal_domain	118	gi|407931002|ref|YP_006846645.1|	-	409	1.1e-34	106.8	0.2	1	1	1.5e-34	2.3e-34	105.8	0.2	1	117	252	364	252	365	0.95
YP_006846675.1	hypothetical protein M3Q_348 [Acinetobacter baumannii TYTH-1]	hypothetical protein M3Q_348	Acinetobacter baumannii TYTH-1	Condensation	PF00668.16	Condensation_domain	301	gi|407931032|ref|YP_006846675.1|	-	352	3e-50	158.6	0.2	1	2	1.5e-50	4.5e-50	158	0	7	300	17	305	13	306	0.93
YP_006846675.1	hypothetical protein M3Q_348 [Acinetobacter baumannii TYTH-1]	hypothetical protein M3Q_348	Acinetobacter baumannii TYTH-1	Condensation	PF00668.16	Condensation_domain	301	gi|407931032|ref|YP_006846675.1|	-	352	3e-50	158.6	0.2	2	2	0.31	0.93	-3.9	0.2	225	244	312	331	307	336	0.57
YP_006846683.1	non-ribosomal peptide synthetase protein [Acinetobacter baumannii TYTH-1]	non-ribosomal peptide synthetase protein	Acinetobacter baumannii TYTH-1	Condensation	PF00668.16	Condensation_domain	301	gi|407931040|ref|YP_006846683.1|	-	133	1.5e-19	57.8	0.1	1	1	6.3e-20	1.9e-19	57.5	0.1	48	154	21	124	18	127	0.9
YP_006846697.1	hypothetical protein M3Q_370 [Acinetobacter baumannii TYTH-1]	hypothetical protein M3Q_370	Acinetobacter baumannii TYTH-1	Condensation	PF00668.16	Condensation_domain	301	gi|407931054|ref|YP_006846697.1|	-	314	1.7e-45	143	0.4	1	2	7.6e-46	2.3e-45	142.6	0	48	300	21	267	18	268	0.95
YP_006846697.1	hypothetical protein M3Q_370 [Acinetobacter baumannii TYTH-1]	hypothetical protein M3Q_370	Acinetobacter baumannii TYTH-1	Condensation	PF00668.16	Condensation_domain	301	gi|407931054|ref|YP_006846697.1|	-	314	1.7e-45	143	0.4	2	2	0.27	0.81	-3.7	0.2	225	244	274	293	269	298	0.57
YP_006846889.1	3-ketoacyl-CoA thiolase [Acinetobacter baumannii TYTH-1]	3-ketoacyl-CoA thiolase	Acinetobacter baumannii TYTH-1	ketoacyl-synt	PF00109.22	Beta-ketoacyl_synthase_N-terminal_domain	253	gi|407931246|ref|YP_006846889.1|	-	390	6.6e-07	16.8	0.4	1	4	0.44	1.3	-3.9	0	195	219	8	32	7	36	0.72
YP_006846889.1	3-ketoacyl-CoA thiolase [Acinetobacter baumannii TYTH-1]	3-ketoacyl-CoA thiolase	Acinetobacter baumannii TYTH-1	ketoacyl-synt	PF00109.22	Beta-ketoacyl_synthase_N-terminal_domain	253	gi|407931246|ref|YP_006846889.1|	-	390	6.6e-07	16.8	0.4	2	4	2.2e-07	6.6e-07	16.8	0.4	174	218	94	138	88	155	0.86
YP_006846889.1	3-ketoacyl-CoA thiolase [Acinetobacter baumannii TYTH-1]	3-ketoacyl-CoA thiolase	Acinetobacter baumannii TYTH-1	ketoacyl-synt	PF00109.22	Beta-ketoacyl_synthase_N-terminal_domain	253	gi|407931246|ref|YP_006846889.1|	-	390	6.6e-07	16.8	0.4	3	4	0.11	0.33	-1.9	0.2	173	251	239	258	222	284	0.64
YP_006846889.1	3-ketoacyl-CoA thiolase [Acinetobacter baumannii TYTH-1]	3-ketoacyl-CoA thiolase	Acinetobacter baumannii TYTH-1	ketoacyl-synt	PF00109.22	Beta-ketoacyl_synthase_N-terminal_domain	253	gi|407931246|ref|YP_006846889.1|	-	390	6.6e-07	16.8	0.4	4	4	0.11	0.34	-1.9	0	95	114	291	310	289	346	0.67
YP_006847098.1	3-oxoacyl-ACP synthase [Acinetobacter baumannii TYTH-1]	3-oxoacyl-ACP synthase	Acinetobacter baumannii TYTH-1	ketoacyl-synt	PF00109.22	Beta-ketoacyl_synthase_N-terminal_domain	253	gi|407931455|ref|YP_006847098.1|	-	400	1.3e-24	74.8	0.1	1	1	1.3e-24	2e-24	74.2	0.1	87	250	78	240	52	242	0.83
YP_006847098.1	3-oxoacyl-ACP synthase [Acinetobacter baumannii TYTH-1]	3-oxoacyl-ACP synthase	Acinetobacter baumannii TYTH-1	Ketoacyl-synt_C	PF02801.18	Beta-ketoacyl_synthase_C-terminal_domain	118	gi|407931455|ref|YP_006847098.1|	-	400	2.2e-31	96.1	0.6	1	1	3.5e-31	5.3e-31	94.9	0.6	4	113	246	351	244	357	0.94
YP_006847101.1	3-oxoacyl-(acyl carrier protein) synthase II [Acinetobacter baumannii TYTH-1]	3-oxoacyl-(acyl carrier protein) synthase II	Acinetobacter baumannii TYTH-1	ketoacyl-synt	PF00109.22	Beta-ketoacyl_synthase_N-terminal_domain	253	gi|407931458|ref|YP_006847101.1|	-	408	1e-45	143.9	2.7	1	1	1e-45	1.5e-45	143.4	2.7	1	253	1	246	1	246	0.89
YP_006847101.1	3-oxoacyl-(acyl carrier protein) synthase II [Acinetobacter baumannii TYTH-1]	3-oxoacyl-(acyl carrier protein) synthase II	Acinetobacter baumannii TYTH-1	Ketoacyl-synt_C	PF02801.18	Beta-ketoacyl_synthase_C-terminal_domain	118	gi|407931458|ref|YP_006847101.1|	-	408	3e-33	102.1	0	1	1	4.7e-33	7e-33	100.9	0	1	117	254	362	254	363	0.96
YP_006847382.1	beta-ketoacyl-ACP synthase I [Acinetobacter baumannii TYTH-1]	beta-ketoacyl-ACP synthase I	Acinetobacter baumannii TYTH-1	ketoacyl-synt	PF00109.22	Beta-ketoacyl_synthase_N-terminal_domain	253	gi|407931739|ref|YP_006847382.1|	-	409	8.1e-44	137.7	1.4	1	1	1.2e-43	1.8e-43	136.6	1.4	1	253	1	244	1	244	0.87
YP_006847382.1	beta-ketoacyl-ACP synthase I [Acinetobacter baumannii TYTH-1]	beta-ketoacyl-ACP synthase I	Acinetobacter baumannii TYTH-1	Ketoacyl-synt_C	PF02801.18	Beta-ketoacyl_synthase_C-terminal_domain	118	gi|407931739|ref|YP_006847382.1|	-	409	2.7e-35	108.8	0.7	1	1	3.2e-35	4.9e-35	107.9	0.7	1	117	252	364	252	365	0.95
YP_006847887.1	3-oxoacyl-ACP synthase [Acinetobacter baumannii TYTH-1]	3-oxoacyl-ACP synthase	Acinetobacter baumannii TYTH-1	ketoacyl-synt	PF00109.22	Beta-ketoacyl_synthase_N-terminal_domain	253	gi|407932244|ref|YP_006847887.1|	-	368	4.4e-09	23.9	1.6	1	2	8e-06	2.4e-05	11.7	0	61	111	71	118	2	133	0.68
YP_006847887.1	3-oxoacyl-ACP synthase [Acinetobacter baumannii TYTH-1]	3-oxoacyl-ACP synthase	Acinetobacter baumannii TYTH-1	ketoacyl-synt	PF00109.22	Beta-ketoacyl_synthase_N-terminal_domain	253	gi|407932244|ref|YP_006847887.1|	-	368	4.4e-09	23.9	1.6	2	2	1e-05	3.1e-05	11.3	0.6	154	199	134	179	122	184	0.86
YP_006848028.1	acetyl-CoA acetyltransferase [Acinetobacter baumannii TYTH-1]	acetyl-CoA acetyltransferase	Acinetobacter baumannii TYTH-1	ketoacyl-synt	PF00109.22	Beta-ketoacyl_synthase_N-terminal_domain	253	gi|407932385|ref|YP_006848028.1|	-	402	9.8e-12	32.6	0	1	1	6.9e-12	2.1e-11	31.6	0	167	222	82	136	78	142	0.85
YP_006848071.1	acetyl-CoA acetyltransferase [Acinetobacter baumannii TYTH-1]	acetyl-CoA acetyltransferase	Acinetobacter baumannii TYTH-1	ketoacyl-synt	PF00109.22	Beta-ketoacyl_synthase_N-terminal_domain	253	gi|407932428|ref|YP_006848071.1|	-	401	2.3e-07	18.3	0.8	1	2	1.8e-07	5.4e-07	17.1	0.2	170	222	84	135	65	143	0.77
YP_006848071.1	acetyl-CoA acetyltransferase [Acinetobacter baumannii TYTH-1]	acetyl-CoA acetyltransferase	Acinetobacter baumannii TYTH-1	ketoacyl-synt	PF00109.22	Beta-ketoacyl_synthase_N-terminal_domain	253	gi|407932428|ref|YP_006848071.1|	-	401	2.3e-07	18.3	0.8	2	2	0.31	0.92	-3.3	0	89	192	363	377	360	391	0.54
YP_006848168.1	hypothetical protein M3Q_1845 [Acinetobacter baumannii TYTH-1]	hypothetical protein M3Q_1845	Acinetobacter baumannii TYTH-1	Condensation	PF00668.16	Condensation_domain	301	gi|407932525|ref|YP_006848168.1|	-	352	3e-50	158.6	0.2	1	2	1.5e-50	4.5e-50	158	0	7	300	17	305	13	306	0.93
YP_006848168.1	hypothetical protein M3Q_1845 [Acinetobacter baumannii TYTH-1]	hypothetical protein M3Q_1845	Acinetobacter baumannii TYTH-1	Condensation	PF00668.16	Condensation_domain	301	gi|407932525|ref|YP_006848168.1|	-	352	3e-50	158.6	0.2	2	2	0.31	0.93	-3.9	0.2	225	244	312	331	307	336	0.57
YP_006848441.1	acetyl-CoA acetyltransferase [Acinetobacter baumannii TYTH-1]	acetyl-CoA acetyltransferase	Acinetobacter baumannii TYTH-1	ketoacyl-synt	PF00109.22	Beta-ketoacyl_synthase_N-terminal_domain	253	gi|407932798|ref|YP_006848441.1|	-	390	3.7e-07	17.6	5.6	1	5	0.0022	0.0033	4.7	0	93	137	31	75	26	86	0.8
YP_006848441.1	acetyl-CoA acetyltransferase [Acinetobacter baumannii TYTH-1]	acetyl-CoA acetyltransferase	Acinetobacter baumannii TYTH-1	ketoacyl-synt	PF00109.22	Beta-ketoacyl_synthase_N-terminal_domain	253	gi|407932798|ref|YP_006848441.1|	-	390	3.7e-07	17.6	5.6	2	5	5.8e-06	8.7e-06	13.1	1.2	169	208	82	121	78	131	0.89
YP_006848441.1	acetyl-CoA acetyltransferase [Acinetobacter baumannii TYTH-1]	acetyl-CoA acetyltransferase	Acinetobacter baumannii TYTH-1	ketoacyl-synt	PF00109.22	Beta-ketoacyl_synthase_N-terminal_domain	253	gi|407932798|ref|YP_006848441.1|	-	390	3.7e-07	17.6	5.6	3	5	0.37	0.56	-2.6	0	82	101	172	191	148	217	0.65
YP_006848441.1	acetyl-CoA acetyltransferase [Acinetobacter baumannii TYTH-1]	acetyl-CoA acetyltransferase	Acinetobacter baumannii TYTH-1	ketoacyl-synt	PF00109.22	Beta-ketoacyl_synthase_N-terminal_domain	253	gi|407932798|ref|YP_006848441.1|	-	390	3.7e-07	17.6	5.6	4	5	0.17	0.25	-1.5	0	234	251	244	261	229	263	0.71
YP_006848441.1	acetyl-CoA acetyltransferase [Acinetobacter baumannii TYTH-1]	acetyl-CoA acetyltransferase	Acinetobacter baumannii TYTH-1	ketoacyl-synt	PF00109.22	Beta-ketoacyl_synthase_N-terminal_domain	253	gi|407932798|ref|YP_006848441.1|	-	390	3.7e-07	17.6	5.6	5	5	0.39	0.58	-2.7	0	96	112	295	311	292	350	0.67
YP_006848441.1	acetyl-CoA acetyltransferase [Acinetobacter baumannii TYTH-1]	acetyl-CoA acetyltransferase	Acinetobacter baumannii TYTH-1	Ketoacyl-synt_C	PF02801.18	Beta-ketoacyl_synthase_C-terminal_domain	118	gi|407932798|ref|YP_006848441.1|	-	390	6.2e-06	14	0.1	1	2	0.00038	0.00056	7.7	0	14	47	20	51	5	53	0.7
YP_006848441.1	acetyl-CoA acetyltransferase [Acinetobacter baumannii TYTH-1]	acetyl-CoA acetyltransferase	Acinetobacter baumannii TYTH-1	Ketoacyl-synt_C	PF02801.18	Beta-ketoacyl_synthase_C-terminal_domain	118	gi|407932798|ref|YP_006848441.1|	-	390	6.2e-06	14	0.1	2	2	0.015	0.022	2.6	0	27	49	292	314	269	367	0.72
YP_006848630.1	beta-ketoadipyl CoA thiolase [Acinetobacter baumannii TYTH-1]	beta-ketoadipyl CoA thiolase	Acinetobacter baumannii TYTH-1	ketoacyl-synt	PF00109.22	Beta-ketoacyl_synthase_N-terminal_domain	253	gi|407932987|ref|YP_006848630.1|	-	404	4.4e-10	27.2	0.7	1	2	4.8e-10	1.4e-09	25.5	0.2	167	208	82	123	67	142	0.84
YP_006848630.1	beta-ketoadipyl CoA thiolase [Acinetobacter baumannii TYTH-1]	beta-ketoadipyl CoA thiolase	Acinetobacter baumannii TYTH-1	ketoacyl-synt	PF00109.22	Beta-ketoacyl_synthase_N-terminal_domain	253	gi|407932987|ref|YP_006848630.1|	-	404	4.4e-10	27.2	0.7	2	2	0.046	0.14	-0.6	0	67	110	241	281	189	332	0.73
YP_006848669.1	pcaF [Acinetobacter baumannii TYTH-1]	pcaF	Acinetobacter baumannii TYTH-1	ketoacyl-synt	PF00109.22	Beta-ketoacyl_synthase_N-terminal_domain	253	gi|407933026|ref|YP_006848669.1|	-	403	6.1e-10	26.7	0.6	1	2	4.9e-10	1.5e-09	25.5	0.2	167	208	84	125	69	144	0.84
YP_006848669.1	pcaF [Acinetobacter baumannii TYTH-1]	pcaF	Acinetobacter baumannii TYTH-1	ketoacyl-synt	PF00109.22	Beta-ketoacyl_synthase_N-terminal_domain	253	gi|407933026|ref|YP_006848669.1|	-	403	6.1e-10	26.7	0.6	2	2	0.14	0.41	-2.2	0	80	107	256	280	208	324	0.65
YP_006848825.1	acetyl-CoA acetyltransferase [Acinetobacter baumannii TYTH-1]	acetyl-CoA acetyltransferase	Acinetobacter baumannii TYTH-1	ketoacyl-synt	PF00109.22	Beta-ketoacyl_synthase_N-terminal_domain	253	gi|407933182|ref|YP_006848825.1|	-	522	2.6e-07	18.1	0.1	1	1	2.4e-07	7.3e-07	16.7	0.1	166	206	177	217	168	231	0.82
YP_006849165.1	basD [Acinetobacter baumannii TYTH-1]	basD	Acinetobacter baumannii TYTH-1	Condensation	PF00668.16	Condensation_domain	301	gi|407933522|ref|YP_006849165.1|	-	980	4.3e-55	174.5	14.5	1	2	1.5e-36	4.4e-36	112.1	1.2	4	301	26	321	23	321	0.9
YP_006849165.1	basD [Acinetobacter baumannii TYTH-1]	basD	Acinetobacter baumannii TYTH-1	Condensation	PF00668.16	Condensation_domain	301	gi|407933522|ref|YP_006849165.1|	-	980	4.3e-55	174.5	14.5	2	2	6.7e-23	2e-22	67.2	6.2	6	272	472	726	468	728	0.9
YP_006849174.1	non-ribosomal peptide synthase [Acinetobacter baumannii TYTH-1]	non-ribosomal peptide synthase	Acinetobacter baumannii TYTH-1	Condensation	PF00668.16	Condensation_domain	301	gi|407933531|ref|YP_006849174.1|	-	698	2.3e-47	149.2	13.7	1	2	7e-05	0.00021	8.1	3.2	14	160	21	160	12	213	0.78
YP_006849174.1	non-ribosomal peptide synthase [Acinetobacter baumannii TYTH-1]	non-ribosomal peptide synthase	Acinetobacter baumannii TYTH-1	Condensation	PF00668.16	Condensation_domain	301	gi|407933531|ref|YP_006849174.1|	-	698	2.3e-47	149.2	13.7	2	2	4.6e-47	1.4e-46	146.6	2.9	3	299	275	567	273	569	0.9
YP_006849573.1	bifunctional protein wax ester synthase/acyl-CoA diacylglycerol acyltransferase [Acinetobacter baumannii TYTH-1]	bifunctional protein wax ester synthase/acyl-CoA diacylglycerol acyltransferase	Acinetobacter baumannii TYTH-1	Condensation	PF00668.16	Condensation_domain	301	gi|407933930|ref|YP_006849573.1|	-	461	1e-09	25.5	0.2	1	2	5.8e-07	1.7e-06	14.9	0.1	82	154	79	151	67	175	0.72
YP_006849573.1	bifunctional protein wax ester synthase/acyl-CoA diacylglycerol acyltransferase [Acinetobacter baumannii TYTH-1]	bifunctional protein wax ester synthase/acyl-CoA diacylglycerol acyltransferase	Acinetobacter baumannii TYTH-1	Condensation	PF00668.16	Condensation_domain	301	gi|407933930|ref|YP_006849573.1|	-	461	1e-09	25.5	0.2	2	2	5.3e-05	0.00016	8.5	0	224	261	237	274	205	309	0.8
YP_006849645.1	acetyl-CoA acetyltransferase [Acinetobacter baumannii TYTH-1]	acetyl-CoA acetyltransferase	Acinetobacter baumannii TYTH-1	ketoacyl-synt	PF00109.22	Beta-ketoacyl_synthase_N-terminal_domain	253	gi|407934002|ref|YP_006849645.1|	-	391	3.3e-08	21	6.9	1	4	0.00096	0.0029	4.9	0	91	127	29	65	26	85	0.77
YP_006849645.1	acetyl-CoA acetyltransferase [Acinetobacter baumannii TYTH-1]	acetyl-CoA acetyltransferase	Acinetobacter baumannii TYTH-1	ketoacyl-synt	PF00109.22	Beta-ketoacyl_synthase_N-terminal_domain	253	gi|407934002|ref|YP_006849645.1|	-	391	3.3e-08	21	6.9	2	4	7e-08	2.1e-07	18.4	1.3	169	208	82	121	76	136	0.87
YP_006849645.1	acetyl-CoA acetyltransferase [Acinetobacter baumannii TYTH-1]	acetyl-CoA acetyltransferase	Acinetobacter baumannii TYTH-1	ketoacyl-synt	PF00109.22	Beta-ketoacyl_synthase_N-terminal_domain	253	gi|407934002|ref|YP_006849645.1|	-	391	3.3e-08	21	6.9	3	4	0.25	0.74	-3	0	113	136	151	174	145	198	0.56
YP_006849645.1	acetyl-CoA acetyltransferase [Acinetobacter baumannii TYTH-1]	acetyl-CoA acetyltransferase	Acinetobacter baumannii TYTH-1	ketoacyl-synt	PF00109.22	Beta-ketoacyl_synthase_N-terminal_domain	253	gi|407934002|ref|YP_006849645.1|	-	391	3.3e-08	21	6.9	4	4	0.22	0.66	-2.8	0.1	233	251	243	261	233	263	0.67
YP_006849654.1	acetyl-CoA acetyltransferase [Acinetobacter baumannii TYTH-1]	acetyl-CoA acetyltransferase	Acinetobacter baumannii TYTH-1	ketoacyl-synt	PF00109.22	Beta-ketoacyl_synthase_N-terminal_domain	253	gi|407934011|ref|YP_006849654.1|	-	401	4.3e-10	27.3	0.1	1	2	1.2e-09	3.7e-09	24.2	0	175	206	91	122	73	145	0.92
YP_006849654.1	acetyl-CoA acetyltransferase [Acinetobacter baumannii TYTH-1]	acetyl-CoA acetyltransferase	Acinetobacter baumannii TYTH-1	ketoacyl-synt	PF00109.22	Beta-ketoacyl_synthase_N-terminal_domain	253	gi|407934011|ref|YP_006849654.1|	-	401	4.3e-10	27.3	0.1	2	2	0.028	0.085	0.1	0	95	114	304	323	292	364	0.81
YP_008889436.1	putative thiolase [Acinetobacter baumannii ZW85-1]	putative thiolase	Acinetobacter baumannii ZW85-1	ketoacyl-synt	PF00109.22	Beta-ketoacyl_synthase_N-terminal_domain	253	gi|565637193|ref|YP_008889436.1|	-	401	4.2e-10	27.3	0.1	1	2	1.2e-09	3.7e-09	24.2	0	175	206	91	122	73	145	0.92
YP_008889436.1	putative thiolase [Acinetobacter baumannii ZW85-1]	putative thiolase	Acinetobacter baumannii ZW85-1	ketoacyl-synt	PF00109.22	Beta-ketoacyl_synthase_N-terminal_domain	253	gi|565637193|ref|YP_008889436.1|	-	401	4.2e-10	27.3	0.1	2	2	0.028	0.085	0.1	0	95	114	304	323	292	364	0.81
YP_008889445.1	putative acetyl-CoA acetyltransferase (acetoacetyl-CoA thiolase) [Acinetobacter baumannii ZW85-1]	putative acetyl-CoA acetyltransferase (acetoacetyl-CoA thiolase)	Acinetobacter baumannii ZW85-1	ketoacyl-synt	PF00109.22	Beta-ketoacyl_synthase_N-terminal_domain	253	gi|565637202|ref|YP_008889445.1|	-	391	3.3e-08	21	6.9	1	4	0.00096	0.0029	4.9	0	91	127	29	65	26	85	0.77
YP_008889445.1	putative acetyl-CoA acetyltransferase (acetoacetyl-CoA thiolase) [Acinetobacter baumannii ZW85-1]	putative acetyl-CoA acetyltransferase (acetoacetyl-CoA thiolase)	Acinetobacter baumannii ZW85-1	ketoacyl-synt	PF00109.22	Beta-ketoacyl_synthase_N-terminal_domain	253	gi|565637202|ref|YP_008889445.1|	-	391	3.3e-08	21	6.9	2	4	7e-08	2.1e-07	18.4	1.3	169	208	82	121	76	136	0.87
[truncated: 68,270 more rows]

## Sheet: 46_marine_filtered_NRPS_PKS
	Protein	Model	Accession	Domain Partial Hit	Number of Partial Hits	E-Value	i-E-Value	Score	i-Score	Hmm From	Hmm to	Ali from	Ali to	PFAM_domain_Description	Protein_NCBI_annotation	Species	NRPS_protein	KS_protein
[truncated: 2,223 more rows]

## Sheet: summary
	total C-KS domains	C-domains	total proteins	NRPS/hybrid proteins
Acaryochloris marina MBIC11017	10	10	6	6
Alteromonas macleodii AltDE1	16	16	10	10
[truncated: 45 more rows]
